# Supplementary material for: Nickel-catalyzed directed sulfenylation of sp2 and sp3 C–H bonds
Source: Royal Society of Chemistry journal article supplement (doi:10.1039/c5cc01970b), 2015-01-01

# Supporting Information

## Nickel-Catalyzed Directed Sulfenylation of $sp^2$ and $sp^3$ C-H Bonds

*Xiaohan Ye,<sup>a</sup> Jeffery. L. Petersen,<sup>a</sup> and Xiaodong Shi<sup>\*a</sup>*

<sup>a</sup>C. Eugene Bennett Department of Chemistry, West Virginia University,  
Morgantown, West Virginia 26506, United States.

Email: <sup>a</sup> [Xiaodong.Shi@mail.wvu.edu](mailto:Xiaodong.Shi@mail.wvu.edu);

|                                                   |            |
|---------------------------------------------------|------------|
| <b>I. General Methods and Materials</b>           | <b>S2</b>  |
| <b>II. Mercury poisoning experiment</b>           | <b>S5</b>  |
| <b>III. Competition experiment</b>                | <b>S5</b>  |
| <b>IV. Proposed Reaction Mechanism</b>            | <b>S6</b>  |
| <b>V. ORTEP Drawing of the Crystal Structures</b> | <b>S7</b>  |
| <b>VI. Compounds Characterization</b>             | <b>S25</b> |
| <b>VII. NMR Spectra Data</b>                      | <b>S46</b> |

## I. General Methods and Materials

All of the reactions dealing with air and/or moisture-sensitive reactions were carried out under an atmosphere of Ar using oven/flame-dried glassware and standard syringe/septa techniques. Unless otherwise noted, all commercial reagents and solvents were obtained from the commercial provider and used without further purification.  $^1\text{H}$  NMR and  $^{13}\text{C}$  NMR spectra were recorded on Agilent 400 MHz spectrometers. Chemical shifts were reported relative to internal tetramethylsilane ( $\delta$  0.00 ppm) or  $\text{CDCl}_3$  ( $\delta$  7.26 ppm) for  $^1\text{H}$  and  $\text{CDCl}_3$  ( $\delta$  77.00 ppm) for  $^{13}\text{C}$ . Flash column chromatography was performed on 230-430 mesh silica gel. Analytical thin layer chromatography was performed with precoated glass baked plates (250 $\mu$ ) and visualized by fluorescence and by charring after treatment with potassium permanganate stain. HRMS were recorded on Thermo Q-Exactive MS

### 1.1 General Procedure for preparation of $\text{sp}^2$ starting materials

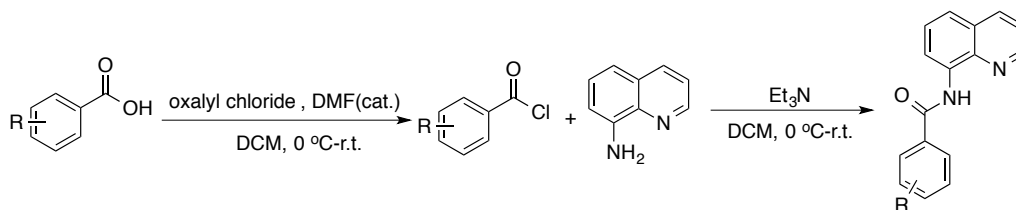

To the solution of carboxylic acid (10 mmol) and 10 drops of DMF in 30mL dry DCM at 0 °C, oxalyl chloride (20 mmol) was added dropwise under Ar. The mixture was then warm to r.t and stirred for another 5h. The solvent was removed under vacuum to give crude acid cholid, which was used directly for next step without further purification.

To the mixture of 8 aminoquinoline (10 mmol) and  $\text{Et}_3\text{N}$  (12 mmol) in dry DCM (30 mL) at 0 °C, the crude acid chloride obtained from previous step in 20 mL dry DCM was added dropwise. The mixture was then warm to r.t and stirred overnight. The reaction was quenched with  $\text{H}_2\text{O}$ . The mixture was extracted, washed with saturated  $\text{NaHCO}_3$  solution. The combined organic layers were dried ( $\text{MgSO}_4$ ), and concentrated in vacuum and then purified by silica gel chromatography with a mixture of hexanes and ethyl acetate as the eluent to afford the corresponding amide products.

### 1.2 General Procedure for preparation of $\text{sp}^3$ starting materials

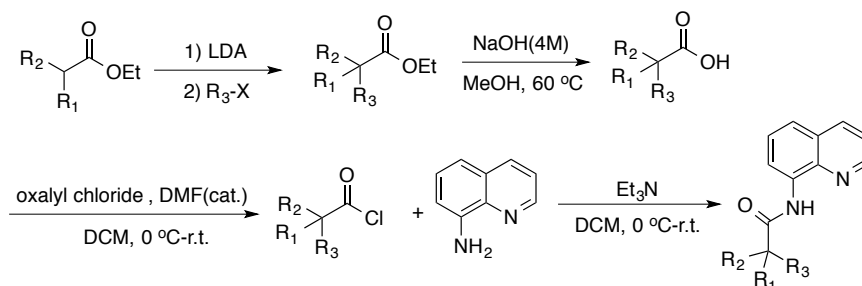

The LDA solution was prepared freshly, by adding 2.5 M n-BuLi in hexane (10 mmol) into the THF solution (30 mL) of diisopropylamine (10 mmol) at -78 °C under Ar atmosphere. The ester (10 mmol) was then added at -78 °C. After stirring at same

temperature for another 1h, Alkyl halide (15mmol) was then added. The mixture was warmed to r.t. and stirred overnight. The reaction was carefully quenched with the  $\text{NH}_4\text{Cl}$  solution. The aqueous phase was extracted with ether and the combined organic layers were dried ( $\text{MgSO}_4$ ), and concentrated in vacuum, affording the crude ester. The crude ester used directly for next step without further purification.

$\text{NaOH}$  (4M, 10 mL) was then adding into a solution of crude ester in 20mL MeOH. The mixture was then stirred at 60 °C overnight. The reaction was carefully acidified with 2M HCl. The aqueous phase was extracted with ether and the combined organic layers were dried ( $\text{MgSO}_4$ ), and concentrated in vacuum, affording the crude acid. The crude acid used directly for next step without further purification.

To the solution of carboxylic acid (10 mmol) and 10 drops of DMF in 30mL dry DCM at 0 °C, oxalyl chloride (20 mmol) was added dropwise under Ar. The mixture was then warm to r.t and stired for another 5h. The solvent was removed under vacuum to give crude acid cholid, which was used directly for next step without further purification.

To the mixuture of 8 aminoquinoline (10 mmol) and  $\text{Et}_3\text{N}$  (12 mmol) in dry DCM (30 mL) at 0 °C, the crude acid chloride obtained from previous step in 20 mL dry DCM was added dropwise. The mixture was then warm to r.t and stirred overnight. The reaction was quenched with  $\text{H}_2\text{O}$ . The mixture was extracted, washed with saturated  $\text{NaHCO}_3$  solution. The combined organic layers were dried ( $\text{MgSO}_4$ ), and concentrated in vacuum and then purified by silica gel chromatography with a mixture of hexanes and ethyl acetate as the eluent to afford the corresponding amide products.

### 1.3 General Procedure for $\text{sp}^2$ C-H Sulfenylation.

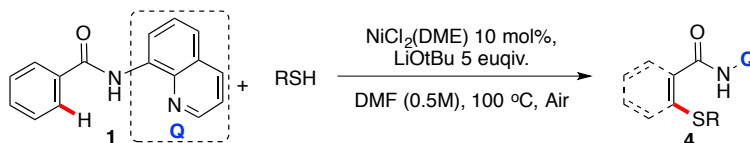

A 10 mL tube was charged with the amides (0.3 mmol, 1.0 equiv.),  $\text{LiOtBu}$  (1.5 mmol, 5.0 equiv.) and  $\text{NiCl}_2(\text{DME})$  (0.03 mmol, 10 mol%) in 0.6 mL anhydrous DMF. The benzenethiol (0.66 mmol, 2.2 equiv.) was then added into mixture slowly. After stirring at r.t for 15 min, the mixture was then heated at 100 °C. The reaction was monitored by TLC. After the reaction was completed, the solvent was removed under reduced pressure and the residue was purified by flash chromatography on silica gel (ethyl acetate/hexane = 15 : 1, V/V) to give desired sulfenylation product.

### 1.4 General Procedure for $\text{sp}^3$ C-H Sulfenylation.

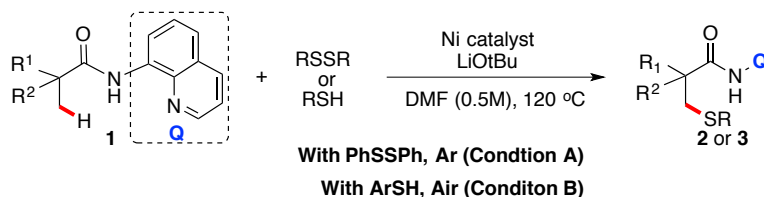

**Condition A:** A 10 mL sealed tube was charged with the amides (0.3 mmol, 1.0 equiv.),  $\text{LiOtBu}$  (1.5 mmol, 5.0 equiv.) and  $\text{Ni}(\text{OTf})_2$  (0.06 mmol, 20 mol%) in 0.6 mL anhydrous DMF. The disulfide (0.75 mmol, 2.5 equiv.) was then added into mixture slowly. The mixture was purged, protected under Ar, and then heated under 120 °C.

After the reaction was completed (20h), the solvent was removed under reduced pressure and the residue was purified by flash chromatography on silica gel (ethyl acetate/hexane = 15 : 1, V/V) to give desired sulfenylation product.

**Condition B:** A 10 mL sealed tube was charged with the amides (0.3 mmol, 1.0 equiv.), LiOtBu (2.1 mmol, 7.0 equiv.) and NiCl<sub>2</sub>(DME) (0.06 mmol, 20 mol%) in 0.6 mL anhydrous DMF. The disulfide (1.2 mmol, 4 equiv.) was then added into mixture dropwise. The mixture was first stirred at r.t for 15min, and then heated under 120 °C. The reaction was monitored by TLC. After the completion of the reaction (5-6 h), the solvent was removed under reduced pressure and the residue was purified by flash chromatography on silica gel (ethyl acetate/hexane = 15 : 1, V/V) to give desired sulfenylation product.



## II. Mercury poisoning experiment.

Excess Hg (100 equiv) was added to Nickel catalyzed  $sp^2$  sulfonylation.

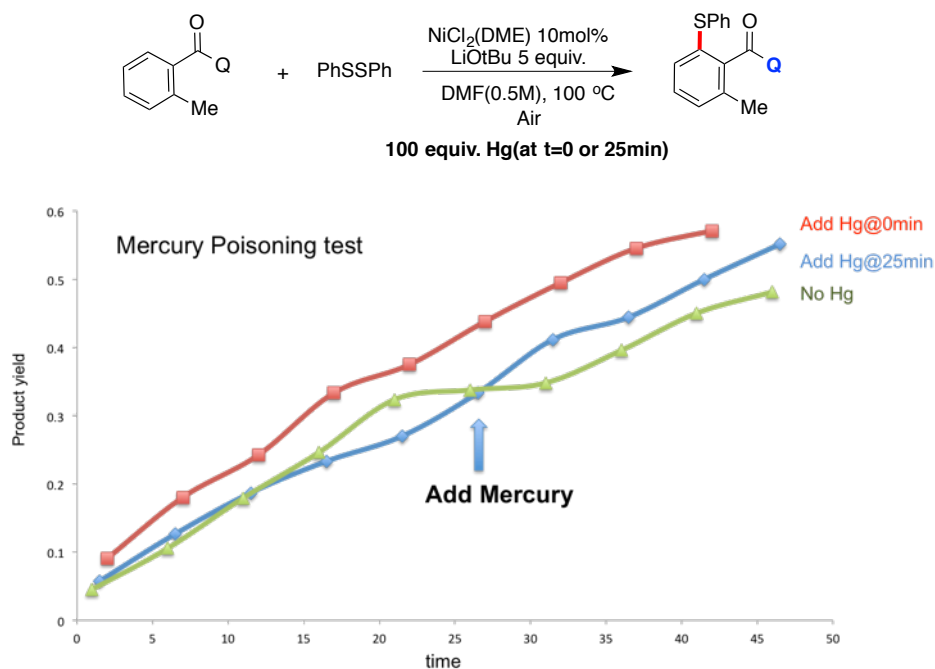

## III. Competition experiment.

To a mixture of benzamide **1c** (0.20 mmol), **1f** (0.20 mmol), phenyldisulfide (0.10 mmol),  $NiCl_2(DME)$  (10.0 mol %) and  $LiOt-Bu$  (1.00 mmol) was added DMF (0.4 mL). The reaction mixture was stirred at 100 °C for 4 h. After cooling to room temperature, the reaction mixture was passed through a silica pad and washed by EtOAc. 1, 3, 5 trimethoxybenzene was then added as internal standard. The mixture was concentrated under vacuum and analyzed by  $^1H$ NMR.

## V. Proposed Reaction Mechanism

Here is one plausible reaction mechanism. Detailed mechanistic investigations are currently undergoing in our lab.

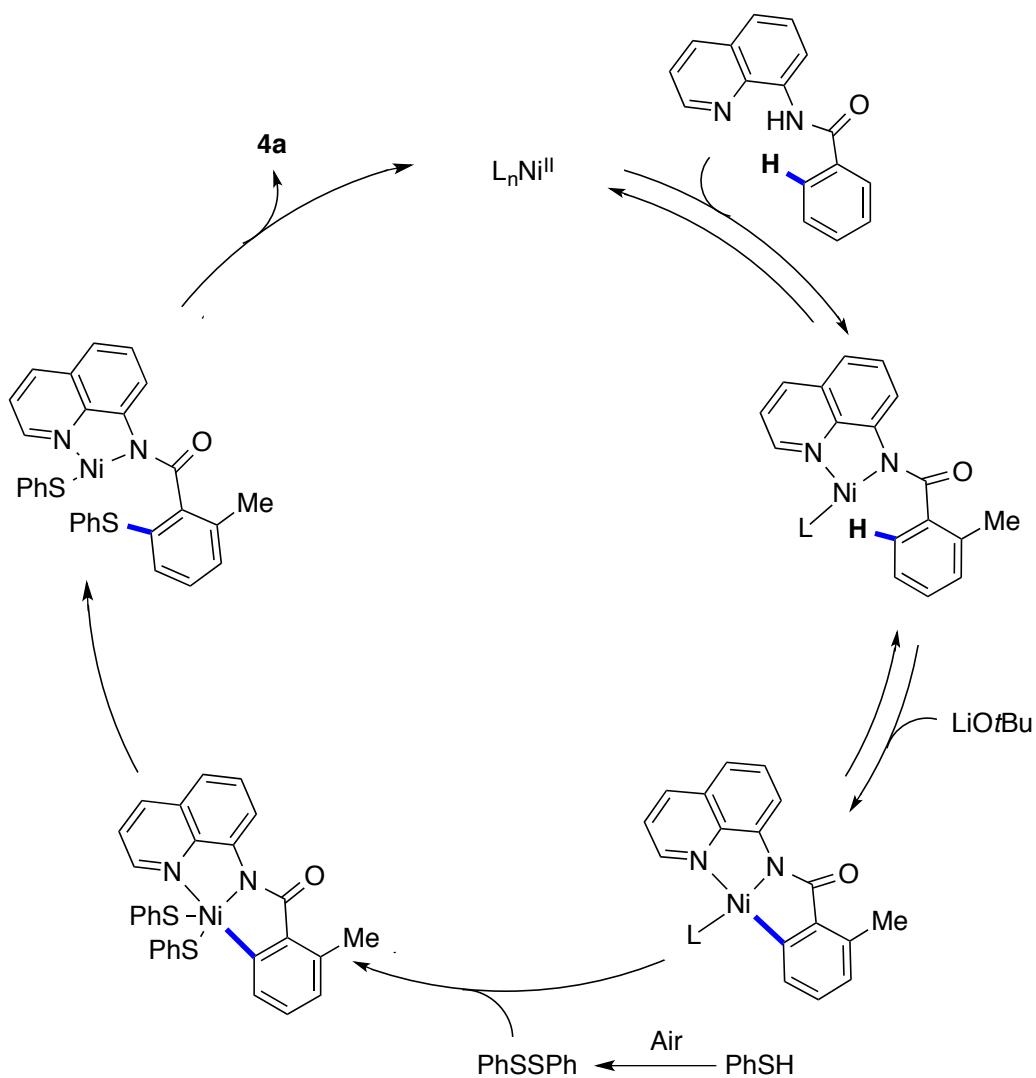

## VI. ORTEP Drawing of the Crystal Structures

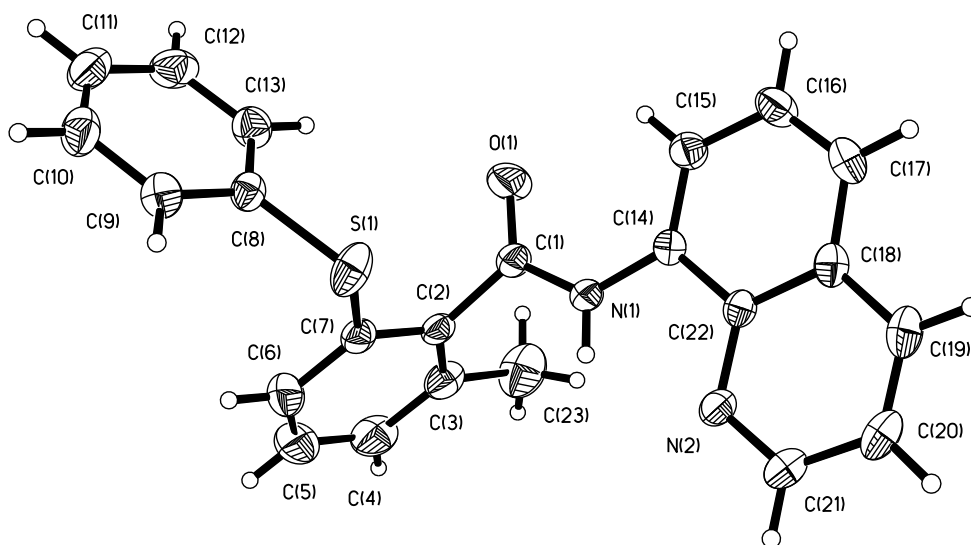

Figure 1. Perspective view of the molecular structure of C<sub>23</sub>H<sub>18</sub>N<sub>2</sub>OS with the atom labeling scheme. The thermal ellipsoids are scaled to enclose 30% probability. CCDC 1052404

## Description of the X-ray Structural Analysis of C<sub>23</sub>H<sub>18</sub>N<sub>2</sub>OS

A colorless crystal cleaved from a larger crystal of C<sub>23</sub>H<sub>18</sub>N<sub>2</sub>OS was washed with the perfluoropolyether PFO-XR75 (Lancaster) and wedged in a glass capillary. The sample was optically aligned on a Bruker AXS D8 Venture fixed-chi X-ray diffractometer equipped with a Triumph monochromator, a Mo K $\alpha$  radiation source ( $\lambda = 0.71073$  Å), and a PHOTON 100 CMOS detector. Two sets of 12 frames each were collected using the omega scan method with a 10 s exposure time. Integration of these frames followed by reflection indexing and least-squares refinement produced a crystal orientation matrix for the monoclinic crystal lattice.

Data collection consisted of the measurement of a total of 812 frames in two runs using omega scans with the detector held at 6.00 cm from the crystal. Frame scan parameters are summarized in Table 1 below:

Table 1. Data collection details for C<sub>23</sub>H<sub>18</sub>N<sub>2</sub>OS.

| Run | 2 $\theta$ | $\omega$ | $\phi$ | $\chi$ | Scan Width (°) | Frames | Exposure Time (sec) |
|-----|------------|----------|--------|--------|----------------|--------|---------------------|
| 1   | 17.51      | -173.99  | -77.17 | 54.79  | 0.50           | 406    | 10.00               |
| 2   | 17.51      | -173.99  | 47.94  | 54.79  | 0.50           | 406    | 10.00               |

The APEX2 software program (version 2014.1-1)<sup>1</sup> was used for diffractometer control, preliminary frame scans, indexing, orientation matrix calculations, least-squares refinement of cell parameters, and the data collection. The frames were integrated with the Bruker SAINT software package using a narrow-frame algorithm. The integration of the data using a [monoclinic](#) unit cell yielded a total of [15986](#) reflections to a maximum  $\theta$  angle of [27.50°](#) ([0.77](#) Å resolution), of which [4423](#) were independent (average redundancy [3.614](#), completeness = [99.3%](#),  $R_{\text{int}}$  = [2.40%](#),  $R_{\text{sig}}$  = [2.37%](#)) and [3405](#) ([76.98%](#)) were greater than  $2\sigma(F^2)$ . The final cell constants of  $a =$  [16.2600\(6\)](#) Å,  $b =$  [8.0578\(3\)](#) Å,  $c =$  [16.7298\(7\)](#) Å,  $\beta =$  [118.2165\(10\)°](#), volume = [1931.46\(13\)](#) Å<sup>3</sup>, are based upon the refinement of the XYZ-centroids of [9986](#) reflections above  $20\sigma(I)$  with  $6.981^\circ < 2\theta < 58.02^\circ$ . Data were corrected for absorption effects using the multi-scan method (SADABS). The ratio of minimum to maximum apparent transmission was [0.839](#). The calculated minimum and maximum transmission coefficients (based on crystal size) are [0.895](#) and [0.947](#).

The structure was solved by the direct methods and difference Fourier analysis using the programs provided by SHELXL-2013.<sup>2</sup> Idealized positions for the hydrogen atoms were included as fixed contributions using a riding model with isotropic temperature factors set at 1.2 times (aromatic hydrogens) or 1.5 (methyl hydrogens) times that of the adjacent carbon atom. The fractional coordinates and isotropic temperature factor for the H atom bound to N(1) was refined. The positions of the methyl hydrogen atoms were optimized by a rigid rotating group refinement with idealized angles. Full-

matrix least-squares refinement, based upon the minimization of  $\sum w_i |F_o^2 - F_c^2|^2$ , with weighting  $w_i^{-1} = [\sigma^2(F_o^2) + (0.0393 P)^2 + 0.09520 P]$ , where  $P = (\text{Max}(F_o^2, 0) + 2 F_c^2)/3$ .<sup>2</sup> The final anisotropic full-matrix least-squares refinement on  $F^2$  with 249 variables converged at  $R1 = 5.53\%$ , for the observed data and  $wR2 = 12.65\%$  for all data. The goodness-of-fit was 1.094.<sup>3</sup>

A correction for secondary extinction was not applied. The largest peak in the final difference electron density synthesis was  $0.291 \text{ e}^-/\text{\AA}^3$  and the largest hole was  $-0.373 \text{ e}^-/\text{\AA}^3$  with an RMS deviation of  $0.039 \text{ e}^-/\text{\AA}^3$ . The linear absorption coefficient, atomic scattering factors, and anomalous dispersion corrections were calculated from values found in the International Tables of X-ray Crystallography.<sup>4</sup>

## References

1. APEX2 is a Bruker AXS crystallographic software package for single crystal data collection, reduction and preparation.
2. Sheldrick, G. M., SHELXL-2013, Crystallographic software package, Bruker AXS, Inc., Madison, Wisconsin, USA.
3.  $R_1 = \sum(|F_o| - |F_c|) / \sum|F_o|$ ,  $wR_2 = [\sum[w(F_o^2 - F_c^2)^2] / \sum[w(F_o^2)^2]]^{1/2}$ ,  $R_{\text{int}} = \sum|F_o^2 - F_o^2(\text{mean})|^2 / \sum[F_o^2]$ , and  $\text{GOF} = [\sum[w(F_o^2 - F_c^2)^2] / (n-p)]^{1/2}$ , where  $n$  is the number of reflections and  $p$  is the total number of parameters which were varied during the last refinement cycle.
4. International Tables for X-ray Crystallography (1974). Vol. IV, p. 55. Birmingham: Kynoch Press. (Present distributor, D. Reidel, Dordrecht.).

Table 2. Crystal data for C<sub>23</sub>H<sub>18</sub>N<sub>2</sub>OS.

|                        |                                                                                                    |
|------------------------|----------------------------------------------------------------------------------------------------|
| Identification code    | xs24cms                                                                                            |
| Chemical formula       | C <sub>23</sub> H <sub>18</sub> N <sub>2</sub> OS                                                  |
| Formula weight         | 370.45                                                                                             |
| Temperature            | 296(2) K                                                                                           |
| Wavelength             | 0.71073 Å                                                                                          |
| Crystal size           | 0.304 x 0.435 x 0.623 mm                                                                           |
| Crystal system         | monoclinic                                                                                         |
| Space group            | P2 <sub>1</sub> /c (No. 14)                                                                        |
| Unit cell dimensions   | a = 16.2600(6) Å    α = 90°<br>b = 8.0578(3) Å    β = 118.2165(10)°<br>c = 16.7298(7) Å    γ = 90° |
| Volume                 | 1931.46(13) Å <sup>3</sup>                                                                         |
| Z                      | 4                                                                                                  |
| Density (calculated)   | 1.274 g/cm <sup>3</sup>                                                                            |
| Absorption coefficient | 0.182 mm <sup>-1</sup>                                                                             |
| F(000)                 | 776                                                                                                |

Table 3. Data collection and structure refinement for C<sub>23</sub>H<sub>18</sub>N<sub>2</sub>OS.

|                                     |                                                                                            |
|-------------------------------------|--------------------------------------------------------------------------------------------|
| Theta range for data analysis       | 2.88 to 27.50°                                                                             |
| Index ranges                        | -20 ≤ h ≤ 21, -9 ≤ k ≤ 10, -21 ≤ l ≤ 21                                                    |
| Reflections collected               | 15986                                                                                      |
| Independent reflections             | 4423 [R(int) = 0.0240]                                                                     |
| Coverage of independent reflections | 99.3%                                                                                      |
| Absorption correction               | multi-scan                                                                                 |
| Max. and min. transmission          | 0.947 and 0.895                                                                            |
| Refinement method                   | Full-matrix least-squares on F <sup>2</sup>                                                |
| Refinement program                  | SHELXL-2013 (Sheldrick, 2013)                                                              |
| Data / restraints / parameters      | 4423 / 0 / 249                                                                             |
| Goodness-of-fit on F <sup>2</sup>   | 1.094                                                                                      |
| Final R indices                     | 3405 data; I > 2σ(I)    R1 = 0.0553, wR2 = 0.1182<br>all data    R1 = 0.0692, wR2 = 0.1265 |
| Largest diff. peak and hole         | 0.291 and -0.373 e <sup>-</sup> /Å <sup>3</sup>                                            |

Table 4. Atomic coordinates and equivalent isotropic atomic displacement parameters ( $\text{\AA}^2$ ) for  $\text{C}_{23}\text{H}_{18}\text{N}_2\text{OS}$ .  $U(\text{eq})$  is defined as one third of the trace of the orthogonalized  $U_{ij}$  tensor.

|     | x/a         | y/b         | z/c         | $U(\text{eq})$ |
|-----|-------------|-------------|-------------|----------------|
| S1  | 0.26690(4)  | 0.41082(7)  | 0.03971(4)  | 0.0647(2)      |
| O1  | 0.22416(12) | 0.45723(19) | 0.81527(13) | 0.0750(5)      |
| N1  | 0.27461(11) | 0.1957(2)   | 0.86306(11) | 0.0441(4)      |
| N2  | 0.35986(11) | 0.90485(19) | 0.90311(11) | 0.0454(4)      |
| C1  | 0.21675(13) | 0.3260(2)   | 0.84671(13) | 0.0448(4)      |
| C2  | 0.14006(12) | 0.2976(2)   | 0.87108(13) | 0.0426(4)      |
| C3  | 0.05402(15) | 0.2334(3)   | 0.80678(16) | 0.0594(6)      |
| C4  | 0.98443(16) | 0.2174(3)   | 0.8317(2)   | 0.0787(8)      |
| C5  | 0.99832(19) | 0.2655(4)   | 0.9158(2)   | 0.0825(8)      |
| C6  | 0.08256(17) | 0.3275(3)   | 0.97851(18) | 0.0676(6)      |
| C7  | 0.15420(13) | 0.3429(2)   | 0.95666(14) | 0.0460(4)      |
| C8  | 0.24392(12) | 0.6148(2)   | 0.06322(12) | 0.0429(4)      |
| C9  | 0.26360(14) | 0.6540(3)   | 0.15083(13) | 0.0538(5)      |
| C10 | 0.25035(16) | 0.8128(3)   | 0.17219(16) | 0.0637(6)      |
| C11 | 0.21705(16) | 0.9316(3)   | 0.1071(2)   | 0.0692(7)      |
| C12 | 0.19655(18) | 0.8942(3)   | 0.01921(19) | 0.0696(6)      |
| C13 | 0.21082(15) | 0.7354(3)   | 0.99702(14) | 0.0555(5)      |
| C14 | 0.35532(12) | 0.1834(2)   | 0.85317(11) | 0.0392(4)      |
| C15 | 0.39246(14) | 0.3086(3)   | 0.82507(13) | 0.0494(5)      |
| C16 | 0.47608(15) | 0.2825(3)   | 0.82110(15) | 0.0573(5)      |
| C17 | 0.52067(14) | 0.1347(3)   | 0.84376(14) | 0.0561(5)      |
| C18 | 0.48374(13) | 0.0022(2)   | 0.87168(12) | 0.0448(4)      |
| C19 | 0.52566(15) | 0.8443(3)   | 0.89651(14) | 0.0565(5)      |
| C20 | 0.48539(16) | 0.7253(3)   | 0.92308(15) | 0.0595(6)      |
| C21 | 0.40237(15) | 0.7601(2)   | 0.92532(14) | 0.0544(5)      |
| C22 | 0.40020(12) | 0.0256(2)   | 0.87656(11) | 0.0381(4)      |
| C23 | 0.0377(2)   | 0.1876(4)   | 0.71306(19) | 0.0952(10)     |

Table 5. Interatomic distances (Å) for C<sub>23</sub>H<sub>18</sub>N<sub>2</sub>OS.

|         |            |         |          |
|---------|------------|---------|----------|
| S1-C8   | 1.7705(19) | S1-C7   | 1.783(2) |
| O1-C1   | 1.212(2)   | N1-C1   | 1.349(2) |
| N1-C14  | 1.402(2)   | N2-C21  | 1.316(2) |
| N2-C22  | 1.360(2)   | C1-C2   | 1.501(3) |
| C2-C7   | 1.387(3)   | C2-C3   | 1.400(3) |
| C3-C4   | 1.384(3)   | C3-C23  | 1.507(4) |
| C4-C5   | 1.372(4)   | C5-C6   | 1.366(4) |
| C6-C7   | 1.382(3)   | C8-C13  | 1.377(3) |
| C8-C9   | 1.381(3)   | C9-C10  | 1.373(3) |
| C10-C11 | 1.356(4)   | C11-C12 | 1.378(4) |
| C12-C13 | 1.382(3)   | C14-C15 | 1.368(3) |
| C14-C22 | 1.426(2)   | C15-C16 | 1.408(3) |
| C16-C17 | 1.352(3)   | C17-C18 | 1.409(3) |
| C18-C19 | 1.410(3)   | C18-C22 | 1.412(3) |
| C19-C20 | 1.350(3)   | C20-C21 | 1.397(3) |



Table 6. Bond angles (°) for C<sub>23</sub>H<sub>18</sub>N<sub>2</sub>OS.

|             |            |             |            |
|-------------|------------|-------------|------------|
| C8-S1-C7    | 102.18(8)  | C1-N1-C14   | 129.27(17) |
| C21-N2-C22  | 117.14(17) | O1-C1-N1    | 124.35(18) |
| O1-C1-C2    | 121.11(17) | N1-C1-C2    | 114.54(16) |
| C7-C2-C3    | 120.53(18) | C7-C2-C1    | 119.11(17) |
| C3-C2-C1    | 120.29(18) | C4-C3-C2    | 117.7(2)   |
| C4-C3-C23   | 121.6(2)   | C2-C3-C23   | 120.7(2)   |
| C5-C4-C3    | 121.4(2)   | C6-C5-C4    | 120.7(2)   |
| C5-C6-C7    | 119.6(2)   | C6-C7-C2    | 120.0(2)   |
| C6-C7-S1    | 120.38(18) | C2-C7-S1    | 119.51(14) |
| C13-C8-C9   | 119.91(19) | C13-C8-S1   | 121.30(15) |
| C9-C8-S1    | 118.73(16) | C10-C9-C8   | 120.2(2)   |
| C11-C10-C9  | 120.1(2)   | C10-C11-C12 | 120.4(2)   |
| C11-C12-C13 | 120.1(2)   | C8-C13-C12  | 119.2(2)   |
| C15-C14-N1  | 125.37(17) | C15-C14-C22 | 120.00(16) |
| N1-C14-C22  | 114.62(16) | C14-C15-C16 | 119.94(19) |
| C17-C16-C15 | 121.4(2)   | C16-C17-C18 | 120.29(18) |
| C17-C18-C19 | 124.00(19) | C17-C18-C22 | 119.38(18) |
| C19-C18-C22 | 116.62(19) | C20-C19-C18 | 119.73(19) |
| C19-C20-C21 | 119.45(19) | N2-C21-C20  | 123.8(2)   |
| N2-C22-C18  | 123.29(17) | N2-C22-C14  | 117.68(15) |
| C18-C22-C14 | 119.02(17) |             |            |

Table 7. Anisotropic atomic displacement parameters ( $\text{\AA}^2$ ) for C<sub>23</sub>H<sub>18</sub>N<sub>2</sub>OS. The anisotropic atomic displacement factor exponent takes the form:  $-2\pi^2 [h^2 a^{*2} U_{11}$

$$+ \dots + 2 h k a^* b^* U_{12}] .$$

|     | U <sub>11</sub> | U <sub>22</sub> | U <sub>33</sub> | U <sub>23</sub> | U <sub>13</sub> | U <sub>12</sub> |
|-----|-----------------|-----------------|-----------------|-----------------|-----------------|-----------------|
| S1  | 0.0490(3)       | 0.0584(4)       | 0.0677(4)       | -0.0115(3)      | 0.0119(3)       | 0.0207(3)       |
| O1  | 0.0789(11)      | 0.0509(9)       | 0.1191(14)      | 0.0367(9)       | 0.0665(11)      | 0.0218(8)       |
| N1  | 0.0474(9)       | 0.0319(8)       | 0.0613(10)      | 0.0036(7)       | 0.0327(8)       | 0.0035(7)       |
| N2  | 0.0497(9)       | 0.0348(8)       | 0.0516(9)       | -0.0023(7)      | 0.0238(7)       | 0.0011(7)       |
| C1  | 0.0451(10)      | 0.0365(10)      | 0.0546(11)      | 0.0036(8)       | 0.0250(9)       | 0.0046(8)       |
| C2  | 0.0408(9)       | 0.0281(8)       | 0.0602(11)      | 0.0013(8)       | 0.0250(8)       | 0.0041(7)       |
| C3  | 0.0486(11)      | 0.0459(12)      | 0.0754(14)      | -0.0082(10)     | 0.0225(10)      | -0.0017(9)      |
| C4  | 0.0441(12)      | 0.0650(16)      | 0.121(2)        | -0.0143(15)     | 0.0340(14)      | -0.0135(11)     |
| C5  | 0.0627(16)      | 0.0771(18)      | 0.130(3)        | -0.0016(17)     | 0.0644(18)      | -0.0063(13)     |
| C6  | 0.0709(15)      | 0.0639(15)      | 0.0883(17)      | 0.0019(13)      | 0.0543(14)      | 0.0094(12)      |
| C7  | 0.0434(10)      | 0.0346(9)       | 0.0629(12)      | 0.0012(8)       | 0.0275(9)       | 0.0058(8)       |
| C8  | 0.0347(9)       | 0.0452(10)      | 0.0464(10)      | -0.0033(8)      | 0.0173(8)       | 0.0042(8)       |
| C9  | 0.0494(11)      | 0.0623(13)      | 0.0457(10)      | -0.0009(9)      | 0.0191(9)       | 0.0023(10)      |
| C10 | 0.0556(12)      | 0.0728(16)      | 0.0626(13)      | -0.0239(12)     | 0.0279(11)      | -0.0070(12)     |
| C11 | 0.0594(13)      | 0.0500(13)      | 0.1005(19)      | -0.0219(13)     | 0.0395(14)      | -0.0059(11)     |
| C12 | 0.0730(15)      | 0.0481(13)      | 0.0901(18)      | 0.0165(12)      | 0.0406(14)      | 0.0053(11)      |
| C13 | 0.0597(12)      | 0.0586(13)      | 0.0504(11)      | 0.0056(9)       | 0.0279(10)      | 0.0045(10)      |
| C14 | 0.0402(9)       | 0.0394(9)       | 0.0396(9)       | -0.0014(7)      | 0.0202(7)       | 0.0020(8)       |
| C15 | 0.0532(11)      | 0.0461(11)      | 0.0532(11)      | 0.0088(9)       | 0.0285(9)       | 0.0053(9)       |
| C16 | 0.0562(12)      | 0.0640(14)      | 0.0625(13)      | 0.0096(10)      | 0.0370(11)      | -0.0020(11)     |
| C17 | 0.0453(11)      | 0.0722(15)      | 0.0594(12)      | 0.0005(11)      | 0.0319(10)      | 0.0035(10)      |
| C18 | 0.0415(10)      | 0.0516(11)      | 0.0394(9)       | -0.0050(8)      | 0.0175(8)       | 0.0056(8)       |
| C19 | 0.0480(11)      | 0.0609(13)      | 0.0570(12)      | -0.0057(10)     | 0.0219(10)      | 0.0155(10)      |
| C20 | 0.0615(13)      | 0.0436(11)      | 0.0619(13)      | -0.0024(10)     | 0.0198(11)      | 0.0164(10)      |
| C21 | 0.0615(13)      | 0.0364(10)      | 0.0611(12)      | -0.0011(9)      | 0.0254(10)      | 0.0021(9)       |
| C22 | 0.0392(9)       | 0.0389(9)       | 0.0338(8)       | -0.0048(7)      | 0.0153(7)       | 0.0010(7)       |
| C23 | 0.0804(18)      | 0.101(2)        | 0.0782(18)      | -0.0321(17)     | 0.0160(15)      | -0.0080(17)     |

Table 8. Hydrogen atom coordinates and isotropic atomic displacement parameters ( $\text{\AA}^2$ ) for  $\text{C}_{23}\text{H}_{18}\text{N}_2\text{OS}$ .

|      | x/a        | y/b      | z/c        | U(eq)    |
|------|------------|----------|------------|----------|
| H1N  | 0.2634(15) | 0.107(3) | 0.8832(14) | 0.053(6) |
| H4   | -0.0730    | 0.1731   | 0.7905     | 0.094    |
| H5   | -0.0501    | 0.2559   | 0.9303     | 0.099    |
| H6   | 0.0916     | 0.3591   | 1.0356     | 0.081    |
| H9   | 0.2859     | 0.5725   | 1.1955     | 0.065    |
| H10  | 0.2642     | 0.8390   | 1.2314     | 0.076    |
| H11  | 0.2080     | 1.0390   | 1.1218     | 0.083    |
| H12  | 0.1731     | 0.9760   | 0.9747     | 0.083    |
| H13  | 0.1982     | 0.7102   | 0.9381     | 0.067    |
| H15  | 0.3625     | 0.4108   | 0.8086     | 0.059    |
| H16  | 0.5011     | 0.3687   | 0.8025     | 0.069    |
| H17  | 0.5760     | 0.1205   | 0.8409     | 0.067    |
| H19  | 0.5808     | -0.1777  | 0.8946     | 0.068    |
| H20  | 0.5127     | -0.3791  | 0.9398     | 0.071    |
| H21  | 0.3756     | -0.3237  | 0.9436     | 0.065    |
| H23A | -0.0218    | 0.1338   | 0.6806     | 0.143    |
| H23B | 0.0861     | 0.1136   | 0.7177     | 0.143    |
| H23C | 0.0385     | 0.2861   | 0.6812     | 0.143    |

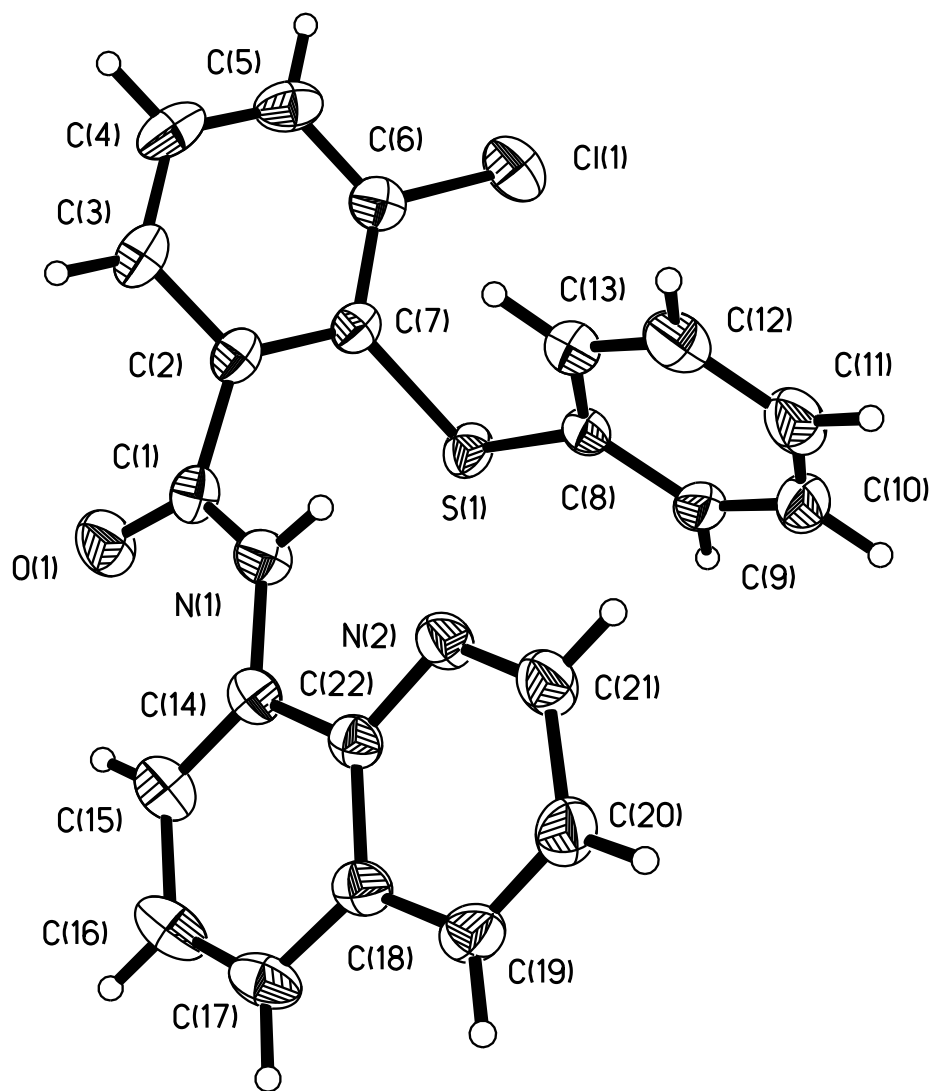

Figure 1. Perspective view of the molecular structure of  $C_{22}H_{15}N_2ClSO$  with the atom labeling scheme for the non-hydrogen atoms. The thermal ellipsoids are scaled to enclose 30% probability. CCDC 1052405

## Description of the X-ray Structural Analysis of C<sub>22</sub>H<sub>15</sub>N<sub>2</sub>ClSO

A light yellow crystalline fragment of C<sub>22</sub>H<sub>15</sub>N<sub>2</sub>ClSO was washed with the perfluoropolyether PFO-XR75 (Lancaster) and wedged in a glass capillary. The sample was optically aligned on a Bruker AXS D8 Venture fixed-chi X-ray diffractometer equipped with a Triumph monochromator, a Mo K $\alpha$  radiation source ( $\lambda = 0.71073$  Å), and a PHOTON 100 CMOS detector. Two sets of 12 frames each were collected using the omega scan method with a 10 s exposure time. Integration of these frames followed by reflection indexing and least-squares refinement produced a crystal orientation matrix for the monoclinic setting of the crystal lattice that was used for the structural analysis.

Data collection consisted of the measurement of a total of 1472 frames in four runs using omega scans with the detector held at 5.00 cm from the crystal. Frame scan parameters are summarized in Table 1 below:

Table 1. Data collection details for C<sub>22</sub>H<sub>15</sub>N<sub>2</sub>ClSO.

| Run | 2 $\theta$ | $\omega$ | $\phi$  | $\chi$ | Scan Width (°) | Frames | Exposure Time (sec) |
|-----|------------|----------|---------|--------|----------------|--------|---------------------|
| 1   | 21.65      | -160.35  | 0.00    | 54.74  | 0.50           | 368    | 20.00               |
| 2   | 21.65      | -160.35  | 120.00  | 54.74  | 0.50           | 368    | 20.00               |
| 3   | 21.65      | -160.35  | -120.00 | 54.74  | 0.50           | 368    | 20.00               |
| 4   | 21.65      | -160.35  | 60.00   | 54.74  | 0.50           | 368    | 20.00               |

The APEX2 software program (version 2014.1-1)<sup>1</sup> was used for diffractometer control, preliminary frame scans, indexing, orientation matrix calculations, least-squares refinement of cell parameters, and the data collection. The frames were integrated with the Bruker SAINT software package using a narrow-frame algorithm. The integration of the data using a **monoclinic** unit cell yielded a total of **28740** reflections to a maximum  $\theta$  angle of **27.50°** (**0.77** Å resolution), of which **4214** were independent (average redundancy **6.820**, completeness = **99.5%**,  $R_{\text{int}}$  = **3.02%**,  $R_{\text{sig}}$  = **1.82%**) and **3444** (**81.73%**) were greater than  $2\sigma(F^2)$ . The final cell constants of  $a = 12.0459(5)$  Å,  $b = 10.3781(5)$  Å,  $c = 15.4051(7)$  Å,  $\beta = 107.3945(12)^\circ$ , volume = **1837.78(14)** Å<sup>3</sup>, are based upon the refinement of the XYZ-centroids of **9974** reflections above  $20\sigma(I)$  with **6.444°**  $< 2\theta < 65.16^\circ$ . Data were corrected for absorption effects using the multi-scan method (SADABS). The calculated minimum and maximum transmission coefficients (based on crystal size) are **0.809** and **0.843**.

The structure was solved by direct methods and difference Fourier analysis using the programs provided by SHELXL-2014.<sup>2</sup> Idealized positions for the hydrogen atoms were included as fixed contributions using a riding model with isotropic temperature factors set at 1.2 times (N-H and aromatic hydrogens) of the adjacent non-hydrogen atom. Full-matrix least-squares refinement, based upon the minimization of  $\sum w_i |F_o^2 - F_c^2|^2$ , with weighting  $w_i^{-1} = [\sigma^2(F_o^2) + (0.0835 P)^2 + 1.1019 P]$ , where  $P = (\text{Max}(F_o^2, 0) + 2 F_c^2)/3$ .<sup>2</sup> The final anisotropic full-matrix least-squares refinement on  $F^2$  with **244**

variables converged at  $R_1 = 5.60\%$ , for the 3444 observed data with  $I > 2\sigma(I)$  and  $wR_2 = 16.76\%$  for all data. The goodness-of-fit was 1.055.<sup>3</sup>

A correction for secondary extinction was not applied. The largest peak in the final difference electron density synthesis was  $0.559 \text{ e}^-/\text{\AA}^3$  and the largest hole was  $-0.380 \text{ e}^-/\text{\AA}^3$  with an RMS deviation of  $0.058 \text{ e}^-/\text{\AA}^3$ . The linear absorption coefficient, atomic scattering factors, and anomalous dispersion corrections were calculated from values found in the International Tables of X-ray Crystallography.<sup>4</sup>

## References

1. APEX2 is a Bruker AXS crystallographic software package for single crystal data collection, reduction and preparation.
2. Sheldrick, G. M., SHELXL-2014, Crystallographic software package, Bruker AXS, Inc., Madison, Wisconsin, USA.
3.  $R_1 = \sum(|F_o| - |F_c|) / \sum|F_o|$ ,  $wR_2 = [\sum[w(F_o^2 - F_c^2)^2] / \sum[w(F_o^2)^2]]^{1/2}$ ,  $R_{\text{int.}} = \sum|F_o^2 - F_o^2(\text{mean})| / \sum[F_o^2]$ , and  $\text{GOF} = [\sum[w(F_o^2 - F_c^2)^2] / (n-p)]^{1/2}$ , where n is the number of reflections and p is the total number of parameters which were varied during the last refinement cycle.
4. International Tables for X-ray Crystallography (1974). Vol. IV, p. 55. Birmingham: Kynoch Press. (Present distributor, D. Reidel, Dordrecht.).

Table 2. Crystal data for C<sub>22</sub>H<sub>15</sub>N<sub>2</sub>ClSO.

|                        |                                                                                                           |
|------------------------|-----------------------------------------------------------------------------------------------------------|
| Identification code    | xs32cms                                                                                                   |
| Chemical formula       | C <sub>22</sub> H <sub>15</sub> N <sub>2</sub> ClSO                                                       |
| Formula weight         | 390.87 g/mol                                                                                              |
| Temperature            | 293(2) K                                                                                                  |
| Wavelength             | 0.71073 Å                                                                                                 |
| Crystal size           | 0.526 x 0.607 x 0.660 mm                                                                                  |
| Crystal system         | monoclinic                                                                                                |
| Space group            | P 2 <sub>1</sub> /n (No. 14, non-standard setting)                                                        |
| Unit cell dimensions   | a = 12.0459(5) Å      α = 90°<br>b = 10.3781(5) Å      β = 107.3945(12)°<br>c = 15.4051(7) Å      γ = 90° |
| Volume                 | 1837.78(14) Å <sup>3</sup>                                                                                |
| Z                      | 4                                                                                                         |
| Density (calculated)   | 1.413 g/cm <sup>3</sup>                                                                                   |
| Absorption coefficient | 0.336 mm <sup>-1</sup>                                                                                    |
| F(000)                 | 808                                                                                                       |

Table 3. Data collection and structure refinement for C<sub>22</sub>H<sub>15</sub>N<sub>2</sub>ClSO.

|                                                        |                                                                                                          |
|--------------------------------------------------------|----------------------------------------------------------------------------------------------------------|
| Theta range for data used in the structural refinement | 2.77 to 25.00°                                                                                           |
| Index ranges                                           | -15 ≤ h ≤ 15, -13 ≤ k ≤ 13, -20 ≤ l ≤ 20                                                                 |
| Reflections                                            | 28740                                                                                                    |
| Independent reflections                                | 4214 [R(int) = 0.0302]                                                                                   |
| Coverage of independent reflections                    | 99.5%                                                                                                    |
| Absorption correction                                  | multi-scan                                                                                               |
| Max. and min. transmission                             | 0.843 and 0.809                                                                                          |
| Refinement method                                      | Full-matrix least-squares on F <sup>2</sup>                                                              |
| Refinement program                                     | SHELXL-2014 (Sheldrick, 2014)                                                                            |
| Data / restraints / parameters                         | 4214 / 0 / 244                                                                                           |
| Goodness-of-fit on F <sup>2</sup>                      | 1.055                                                                                                    |
| Final R indices                                        | 3444 data; I>2σ(I)    R1 = 0.0560, wR2 = 0.1495<br>all data                    R1 = 0.0679, wR2 = 0.1676 |
| Largest diff. peak and hole                            | 0.559 and -0.380 e <sup>-</sup> /Å <sup>3</sup>                                                          |

Table 4. Atomic coordinates and equivalent isotropic atomic displacement parameters ( $\text{\AA}^2$ ) for  $\text{C}_{22}\text{H}_{15}\text{N}_2\text{ClSO}$ .  $U(\text{eq})$  is defined as one third of the trace of the orthogonalized  $U_{ij}$  tensor.

|     | x/a         | y/b         | z/c         | $U(\text{eq})$ |
|-----|-------------|-------------|-------------|----------------|
| Cl1 | 0.33168(7)  | 0.52839(8)  | 0.11672(5)  | 0.0787(3)      |
| S1  | 0.59522(5)  | 0.48751(6)  | 0.23561(4)  | 0.0533(2)      |
| O1  | 0.67933(18) | 0.13640(19) | 0.32607(14) | 0.0748(6)      |
| N1  | 0.69058(17) | 0.31069(19) | 0.41662(13) | 0.0507(4)      |
| N2  | 0.75732(17) | 0.49700(18) | 0.53759(13) | 0.0505(4)      |
| C1  | 0.6362(2)   | 0.2325(2)   | 0.34750(15) | 0.0478(5)      |
| C2  | 0.51317(19) | 0.2684(2)   | 0.29605(14) | 0.0453(5)      |
| C3  | 0.4261(2)   | 0.1793(3)   | 0.29601(17) | 0.0580(6)      |
| C4  | 0.3126(2)   | 0.2025(3)   | 0.24305(19) | 0.0681(8)      |
| C5  | 0.2845(2)   | 0.3098(3)   | 0.18969(18) | 0.0647(7)      |
| C6  | 0.3705(2)   | 0.3964(2)   | 0.18859(16) | 0.0540(5)      |
| C7  | 0.48536(19) | 0.3786(2)   | 0.24198(14) | 0.0450(5)      |
| C8  | 0.58105(18) | 0.6120(2)   | 0.31105(15) | 0.0451(5)      |
| C9  | 0.6468(2)   | 0.7222(2)   | 0.31205(18) | 0.0560(6)      |
| C10 | 0.6445(2)   | 0.8216(3)   | 0.3706(2)   | 0.0700(8)      |
| C11 | 0.5769(3)   | 0.8130(3)   | 0.4284(2)   | 0.0752(9)      |
| C12 | 0.5109(2)   | 0.7043(3)   | 0.42684(19) | 0.0657(7)      |
| C13 | 0.5122(2)   | 0.6038(2)   | 0.36840(17) | 0.0538(5)      |
| C14 | 0.80788(19) | 0.3082(2)   | 0.47011(14) | 0.0454(5)      |
| C15 | 0.8889(2)   | 0.2174(3)   | 0.46488(16) | 0.0582(6)      |
| C16 | 0.0041(2)   | 0.2301(3)   | 0.52041(18) | 0.0683(8)      |
| C17 | 0.0392(2)   | 0.3291(3)   | 0.57955(16) | 0.0618(7)      |
| C18 | 0.95850(19) | 0.4227(2)   | 0.58741(14) | 0.0489(5)      |
| C19 | 0.9862(2)   | 0.5283(3)   | 0.64795(17) | 0.0587(6)      |
| C20 | 0.9026(2)   | 0.6126(3)   | 0.65187(18) | 0.0639(7)      |
| C21 | 0.7883(2)   | 0.5935(3)   | 0.59484(18) | 0.0627(7)      |
| C22 | 0.84156(18) | 0.4121(2)   | 0.53288(13) | 0.0436(5)      |



Table 5. Interatomic distances (Å) for C<sub>22</sub>H<sub>15</sub>N<sub>2</sub>ClSO.

|         |          |         |          |
|---------|----------|---------|----------|
| Cl1-C6  | 1.735(3) | S1-C7   | 1.765(2) |
| S1-C8   | 1.780(2) | O1-C1   | 1.215(3) |
| N1-C1   | 1.344(3) | N1-C14  | 1.407(3) |
| N2-C21  | 1.313(3) | N2-C22  | 1.362(3) |
| C1-C2   | 1.504(3) | C2-C7   | 1.396(3) |
| C2-C3   | 1.399(3) | C3-C4   | 1.387(4) |
| C4-C5   | 1.365(4) | C5-C6   | 1.376(4) |
| C6-C7   | 1.394(3) | C8-C13  | 1.384(3) |
| C8-C9   | 1.389(3) | C9-C10  | 1.377(4) |
| C10-C11 | 1.377(5) | C11-C12 | 1.376(4) |
| C12-C13 | 1.381(4) | C14-C15 | 1.376(3) |
| C14-C22 | 1.424(3) | C15-C16 | 1.402(4) |
| C16-C17 | 1.355(4) | C17-C18 | 1.405(3) |
| C18-C22 | 1.412(3) | C18-C19 | 1.413(4) |
| C19-C20 | 1.349(4) | C20-C21 | 1.408(4) |

Table 6. Bond angles (°) for C<sub>22</sub>H<sub>15</sub>N<sub>2</sub>ClSO.

|             |            |             |            |
|-------------|------------|-------------|------------|
| C7-S1-C8    | 102.03(10) | C1-N1-C14   | 128.3(2)   |
| C21-N2-C22  | 117.5(2)   | O1-C1-N1    | 124.4(2)   |
| O1-C1-C2    | 119.7(2)   | N1-C1-C2    | 116.0(2)   |
| C7-C2-C3    | 119.7(2)   | C7-C2-C1    | 122.75(19) |
| C3-C2-C1    | 117.2(2)   | C4-C3-C2    | 119.5(2)   |
| C5-C4-C3    | 121.3(2)   | C4-C5-C6    | 119.2(2)   |
| C5-C6-C7    | 121.6(2)   | C5-C6-Cl1   | 117.6(2)   |
| C7-C6-Cl1   | 120.76(19) | C6-C7-C2    | 118.6(2)   |
| C6-C7-S1    | 120.71(18) | C2-C7-S1    | 120.51(17) |
| C13-C8-C9   | 119.5(2)   | C13-C8-S1   | 124.42(18) |
| C9-C8-S1    | 116.07(18) | C10-C9-C8   | 120.1(3)   |
| C9-C10-C11  | 120.5(3)   | C12-C11-C10 | 119.5(3)   |
| C11-C12-C13 | 120.8(3)   | C12-C13-C8  | 119.7(2)   |
| C15-C14-N1  | 125.7(2)   | C15-C14-C22 | 119.7(2)   |
| N1-C14-C22  | 114.57(18) | C14-C15-C16 | 119.4(2)   |
| C17-C16-C15 | 122.3(2)   | C16-C17-C18 | 119.9(2)   |
| C17-C18-C22 | 119.2(2)   | C17-C18-C19 | 124.1(2)   |
| C22-C18-C19 | 116.7(2)   | C20-C19-C18 | 120.0(2)   |
| C19-C20-C21 | 119.0(2)   | N2-C21-C20  | 123.7(2)   |
| N2-C22-C18  | 123.0(2)   | N2-C22-C14  | 117.41(18) |

Table 7. Anisotropic atomic displacement parameters ( $\text{\AA}^2$ ) for  $\text{C}_{22}\text{H}_{15}\text{N}_2\text{ClSO}$ . The anisotropic atomic displacement factor exponent takes the form:  $-2\pi^2[\text{h}^2 \text{a}^{*2} \text{U}_{11} + \dots + 2 \text{h k a}^* \text{b}^* \text{U}_{12}]$ .

|     | $\text{U}_{11}$ | $\text{U}_{22}$ | $\text{U}_{33}$ | $\text{U}_{23}$ | $\text{U}_{13}$ | $\text{U}_{12}$ |
|-----|-----------------|-----------------|-----------------|-----------------|-----------------|-----------------|
| Cl1 | 0.0830(5)       | 0.0780(5)       | 0.0704(5)       | 0.0082(3)       | 0.0158(4)       | 0.0228(4)       |
| S1  | 0.0582(4)       | 0.0474(3)       | 0.0622(4)       | 0.0003(2)       | 0.0303(3)       | -0.0063(2)      |
| O1  | 0.0807(13)      | 0.0544(11)      | 0.0793(13)      | -0.0221(9)      | 0.0089(10)      | 0.0097(9)       |
| N1  | 0.0509(10)      | 0.0531(11)      | 0.0458(10)      | -0.0112(8)      | 0.0110(8)       | 0.0047(8)       |
| N2  | 0.0501(10)      | 0.0493(10)      | 0.0455(10)      | -0.0056(8)      | 0.0042(8)       | 0.0063(8)       |
| C1  | 0.0589(12)      | 0.0433(11)      | 0.0416(11)      | -0.0016(9)      | 0.0157(9)       | -0.0045(9)      |
| C2  | 0.0546(11)      | 0.0452(11)      | 0.0391(10)      | -0.0100(8)      | 0.0183(9)       | -0.0097(9)      |
| C3  | 0.0719(16)      | 0.0532(13)      | 0.0535(13)      | -0.0064(10)     | 0.0259(12)      | -0.0199(11)     |
| C4  | 0.0605(15)      | 0.0824(19)      | 0.0669(16)      | -0.0204(14)     | 0.0273(13)      | -0.0318(14)     |
| C5  | 0.0475(13)      | 0.0859(19)      | 0.0592(15)      | -0.0194(14)     | 0.0136(11)      | -0.0090(12)     |
| C6  | 0.0552(13)      | 0.0595(14)      | 0.0471(12)      | -0.0093(10)     | 0.0151(10)      | 0.0021(10)      |
| C7  | 0.0486(11)      | 0.0454(11)      | 0.0446(11)      | -0.0076(8)      | 0.0194(9)       | -0.0063(9)      |
| C8  | 0.0394(10)      | 0.0419(10)      | 0.0482(11)      | 0.0044(8)       | 0.0041(8)       | 0.0041(8)       |
| C9  | 0.0425(11)      | 0.0504(13)      | 0.0664(15)      | 0.0100(11)      | 0.0032(10)      | -0.0015(9)      |
| C10 | 0.0603(15)      | 0.0490(14)      | 0.0835(19)      | -0.0017(13)     | -0.0048(14)     | -0.0028(11)     |
| C11 | 0.0702(17)      | 0.0615(16)      | 0.0769(19)      | -0.0199(14)     | -0.0039(14)     | 0.0138(13)      |
| C12 | 0.0597(14)      | 0.0718(17)      | 0.0610(15)      | -0.0076(13)     | 0.0109(12)      | 0.0148(13)      |
| C13 | 0.0485(12)      | 0.0519(13)      | 0.0596(13)      | 0.0002(10)      | 0.0140(10)      | 0.0027(10)      |
| C14 | 0.0518(11)      | 0.0492(11)      | 0.0355(10)      | 0.0044(8)       | 0.0137(8)       | 0.0048(9)       |
| C15 | 0.0700(15)      | 0.0625(15)      | 0.0432(11)      | 0.0009(10)      | 0.0186(10)      | 0.0176(12)      |
| C16 | 0.0657(15)      | 0.089(2)        | 0.0532(14)      | 0.0138(13)      | 0.0218(12)      | 0.0344(14)      |
| C17 | 0.0495(12)      | 0.0871(19)      | 0.0458(12)      | 0.0168(12)      | 0.0098(10)      | 0.0155(12)      |
| C18 | 0.0477(11)      | 0.0587(13)      | 0.0374(10)      | 0.0134(9)       | 0.0082(8)       | 0.0013(10)      |
| C19 | 0.0546(13)      | 0.0647(15)      | 0.0458(12)      | 0.0083(11)      | -0.0014(10)     | -0.0083(11)     |
| C20 | 0.0716(16)      | 0.0524(13)      | 0.0531(13)      | -0.0047(11)     | -0.0036(12)     | -0.0057(12)     |
| C21 | 0.0651(15)      | 0.0529(14)      | 0.0587(14)      | -0.0084(11)     | 0.0012(11)      | 0.0093(11)      |
| C22 | 0.0457(10)      | 0.0471(11)      | 0.0370(10)      | 0.0074(8)       | 0.0105(8)       | 0.0031(8)       |

Table 8. Hydrogen atom coordinates and isotropic atomic displacement parameters ( $\text{\AA}^2$ ) for  $\text{C}_{22}\text{H}_{15}\text{N}_2\text{ClSO}$ .

|     | x/a    | y/b    | z/c    | U(eq) |
|-----|--------|--------|--------|-------|
| H1  | 0.6483 | 0.3698 | 0.4299 | 0.061 |
| H3  | 0.4440 | 0.1050 | 0.3312 | 0.07  |
| H4  | 0.2546 | 0.1439 | 0.2439 | 0.082 |
| H5  | 0.2081 | 0.3241 | 0.1545 | 0.078 |
| H9  | 0.6924 | 0.7288 | 0.2731 | 0.067 |
| H10 | 0.6888 | 0.8951 | 0.3712 | 0.084 |
| H11 | 0.5760 | 0.8800 | 0.4682 | 0.09  |
| H12 | 0.4649 | 0.6985 | 0.4656 | 0.079 |
| H13 | 0.4670 | 0.5309 | 0.3676 | 0.065 |
| H15 | 0.8674 | 0.1483 | 0.4249 | 0.07  |
| H16 | 1.0584 | 0.1683 | 0.5165 | 0.082 |
| H17 | 1.1165 | 0.3351 | 0.6149 | 0.074 |
| H19 | 1.0621 | 0.5397 | 0.6851 | 0.07  |
| H20 | 0.9201 | 0.6823 | 0.6916 | 0.077 |
| H21 | 0.7316 | 0.6526 | 0.5979 | 0.075 |

## **VI. Compounds Characterization**

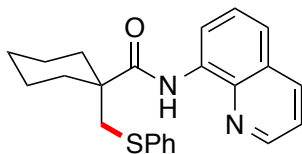

**2a**

**2a:** 1-((phenylthio)methyl)-N-(quinolin-8-yl)cyclohexanecarboxamide was prepared following the general procedure **1.4 Condition A** and purified by flash chromatography (Hexane-EtOAc, v/v 20/1) as colorless oil; Isolated yield 86%;

**<sup>1</sup>H NMR** (400 MHz; CDCl<sub>3</sub>): δ 10.40 (s, 1H), 8.82 (dd, *J* = 4.2, 1.7 Hz, 1H), 8.71 (dd, *J* = 5.8, 3.3 Hz, 1H), 8.15 (dd, *J* = 8.3, 1.7 Hz, 1H), 7.50-7.44 (m, 3H), 7.32-7.29 (m, 2H), 7.08-7.04 (m, 2H), 7.01-6.97 (m, 1H), 3.32 (s, 2H), 2.35-2.30 (m, 2H), 1.74-1.55 (m, 7H), 1.43-1.37 (m, 1H).

**<sup>13</sup>C NMR** (101 MHz; CDCl<sub>3</sub>): δ 173.4, 148.2, 138.8, 136.7, 136.2, 134.3, 129.9, 128.6, 127.8, 127.3, 125.9, 121.47, 121.29, 116.4, 49.1, 44.5, 33.8, 25.7, 22.8.

**HRMS** Calculated for [C<sub>23</sub>H<sub>25</sub>N<sub>2</sub>OS]<sup>+</sup>: 377.1682, Found: 377.1687

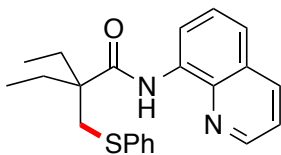

**2b**

**2b:** 2-ethyl-2-((phenylthio)methyl)-N-(quinolin-8-yl)butanamide was prepared following the general procedure **1.4 Condition A** and purified by flash chromatography (Hexane-EtOAc, v/v 20/1) as colorless oil; Isolated yield 74%;

**<sup>1</sup>H NMR** (400 MHz; CDCl<sub>3</sub>): δ 10.32 (s, 1H), 8.81 (dd, *J* = 4.3, 1.7 Hz, 1H), 8.76 (dd, *J* = 7.0, 2.0 Hz, 1H), 8.15 (dd, *J* = 8.3, 1.7 Hz, 1H), 7.54-7.40 (m, 6H), 7.21-7.17 (m, 2H), 7.12-7.10 (m, 1H), 3.41 (s, 2H), 2.04-1.89 (m, 4H), 0.93 (t, *J* = 7.4 Hz, 6H).

**<sup>13</sup>C NMR** (101 MHz; CDCl<sub>3</sub>): δ 173.8, 148.2, 138.8, 136.9, 136.2, 134.3, 132.4, 130.0, 128.7, 127.9, 127.4, 126.0, 121.5, 121.3, 116.3, 52.0, 38.6, 28.0, 8.6.

**HRMS** Calculated for [C<sub>22</sub>H<sub>25</sub>N<sub>2</sub>OS]<sup>+</sup>: 365.1682, Found: 365.1684.

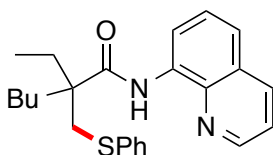

**2c**

**2c:** 2-ethyl-2-((phenylthio)methyl)-N-(quinolin-8-yl)heptanamide was prepared following the general procedure **1.4 Condition A** and purified by flash chromatography (Hexane-EtOAc, v/v 20/1) as colorless oil; Isolated yield 87%;

**<sup>1</sup>H NMR** (400 MHz; CDCl<sub>3</sub>): δ 10.33 (s, 1H), 8.81 (dd, *J* = 4.2, 1.7 Hz, 1H), 8.75 (dd, *J* = 7.0, 1.9 Hz, 1H), 8.15 (dd, *J* = 8.3, 1.7 Hz, 1H), 7.52-7.41 (m, 5H), 7.22-7.18 (m, 2H), 7.12 (m, 1H), 3.45-3.38 (ABq, *J* = 12.8 Hz, 2H), 2.05-1.78 (m, 5H), 1.31-1.26 (m, 5H), 0.93 (t, *J* = 7.4 Hz, 3H), 0.85 (t, *J* = 6.9 Hz, 3H).

**<sup>13</sup>C NMR** (101 MHz; CDCl<sub>3</sub>): δ 173.9, 148.2, 138.8, 137.0, 136.2, 134.3, 130.0, 128.7, 127.9, 127.4, 126.0, 121.5, 121.3, 116.3, 51.7, 38.9, 35.3, 28.4, 26.3, 23.1, 13.9, 8.6

**HRMS** Calculated for [C<sub>24</sub>H<sub>29</sub>N<sub>2</sub>OS]<sup>+</sup>: 393.1995, Found: 393.2000.

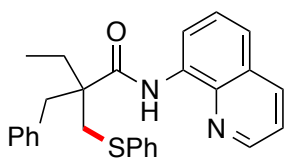

**2d**

**2d: 2-benzyl-2-((phenylthio)methyl)-N-(quinolin-8-yl)butanamide** was prepared following the general procedure **1.4 Condition A** and purified by flash chromatography (Hexane-EtOAc, v/v 20/1) as colorless oil; Isolated yield 75%;

**<sup>1</sup>H NMR** (400 MHz; CDCl<sub>3</sub>): δ 10.27 (s, 1H), 8.75-8.73 (m, 2H), 8.15 (dd, *J* = 8.3, 1.7 Hz, 1H), 7.55-7.49 (m, 2H), 7.45-7.39 (m, 3H), 7.25-7.10 (m, 8H), 3.40-3.21 (m, 4H), 1.97 (q, *J* = 7.4 Hz, 2H), 1.02 (t, *J* = 7.4 Hz, 3H).

**<sup>13</sup>C NMR** (101 MHz; CDCl<sub>3</sub>): δ 172.9, 148.2, 138.7, 136.74, 136.68, 136.2, 130.08, 129.93, 128.8, 128.2, 127.98, 127.87, 127.4, 126.6, 126.0, 121.52, 121.41, 116.4, 53.1, 41.0, 38.6, 28.2, 8.8.

**HRMS** Calculated for [C<sub>27</sub>H<sub>27</sub>N<sub>2</sub>OS]<sup>+</sup>: 427.1839, Found: 427.1845.

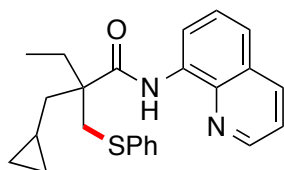

**2e**

**2e: 2-(cyclopropylmethyl)-2-((phenylthio)methyl)-N-(quinolin-8-yl)butanamide** was prepared following the general procedure **1.4 Condition A** and purified by flash chromatography (Hexane-EtOAc, v/v 20/1) as colorless oil; Isolated yield 71%;

**<sup>1</sup>H NMR** (400 MHz; CDCl<sub>3</sub>): δ 10.34 (s, 1H), 8.81 (dd, *J* = 4.2, 1.7 Hz, 1H), 8.76 (dd, *J* = 7.1, 1.9 Hz, 1H), 8.16 (dd, *J* = 8.3, 1.7 Hz, 1H), 7.53-7.50 (m, 2H), 7.47-7.41 (m, 3H), 7.23-7.19 (m, 2H), 7.12 (d, *J* = 7.4 Hz, 1H), 3.54 (d, *J* = 0.9 Hz, 2H), 2.05 (dt, *J* = 17.2, 7.2 Hz, 2H), 1.86 (dd, *J* = 6.8, 3.4 Hz, 2H), 0.95 (t, *J* = 7.4 Hz, 3H), 0.72-0.68 (m, 1H), 0.41-0.38 (m, 2H), 0.21-0.11 (m, 2H).

**<sup>13</sup>C NMR** (101 MHz; CDCl<sub>3</sub>): δ 173.9, 148.2, 138.8, 137.0, 136.3, 134.3, 129.8, 128.7, 127.9, 127.4, 125.9, 121.5, 121.3, 116.4, 52.4, 40.3, 38.8, 28.3, 8.6, 6.4, 4.4, 4.1

**HRMS** Calculated for [C<sub>24</sub>H<sub>27</sub>N<sub>2</sub>OS]<sup>+</sup>: 391.1839, Found: 391.1840.

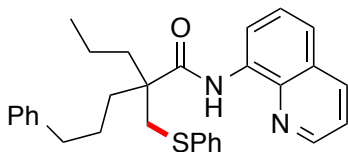

**2f**

**2f:** 2-ethyl-5-phenyl-2-((phenylthio)methyl)-N-(quinolin-8-yl)pentanamide was prepared following the general procedure **1.4 Condition A** and purified by flash chromatography (Hexane-EtOAc, v/v 20/1) as colorless oil; Isolated yield 75%;

**<sup>1</sup>H NMR** (400 MHz; CDCl<sub>3</sub>): δ 10.29 (s, 1H), 8.79 (dd, *J* = 4.2, 1.7 Hz, 1H), 8.72 (dd, *J* = 6.7, 2.3 Hz, 1H), 8.16 (dd, *J* = 8.3, 1.7 Hz, 1H), 7.52-7.40 (m, 5H), 7.19-7.07 (m, 8H), 3.41 (s, 2H), 2.58 (t, *J* = 7.6 Hz, 2H), 2.00-1.96 (m, 1H), 1.92-1.84 (m, 2H), 1.82-1.74 (m, 1H), 1.65-1.60 (m, 2H), 1.32-1.24 (m, 2H), 0.87 (t, *J* = 7.3 Hz, 3H).

**<sup>13</sup>C NMR** (101 MHz; CDCl<sub>3</sub>): δ 173.8, 148.2, 141.9, 138.8, 136.9, 136.2, 134.3, 130.1, 128.8, 128.34, 128.18, 127.9, 127.4, 126.1, 125.7, 121.53, 121.34, 116.4, 51.5, 39.4, 38.2, 36.1, 35.4, 25.9, 17.5, 14.4

**HRMS** Calculated for [C<sub>30</sub>H<sub>33</sub>N<sub>2</sub>OS]<sup>+</sup>: 469.2308, Found: 469.2315.

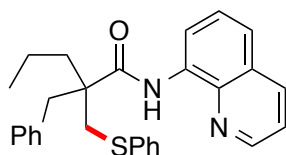

**2g**

**2g:** 2-benzyl-2-((phenylthio)methyl)-N-(quinolin-8-yl)pentanamide was prepared following the general procedure **1.4 Condition A** and purified by flash chromatography (Hexane-EtOAc, v/v 20/1) as colorless oil; Isolated yield 88%;

**<sup>1</sup>H NMR** (400 MHz; CDCl<sub>3</sub>): δ 10.28 (s, 1H), 8.75-8.72 (m, 2H), 8.14 (dd, *J* = 8.3, 1.7 Hz, 1H), 7.55-7.48 (m, 2H), 7.44-7.39 (m, 3H), 7.25-7.09 (m, 8H), 3.38-3.26 (m, 4H), 1.91-1.82 (m, 2H), 1.46-1.40 (m, 2H), 0.90 (t, *J* = 7.3 Hz, 3H).

**<sup>13</sup>C NMR** (101 MHz; CDCl<sub>3</sub>): δ 173.0, 148.2, 138.7, 136.71, 136.70, 136.2, 134.1, 130.07, 129.91, 128.8, 128.2, 127.9, 127.4, 126.6, 126.0, 121.51, 121.39, 116.4, 52.8, 41.4, 38.9, 37.9, 17.7, 14.3

**HRMS** Calculated for [C<sub>28</sub>H<sub>29</sub>N<sub>2</sub>OS]<sup>+</sup>: 441.1995, Found: 441.2001.

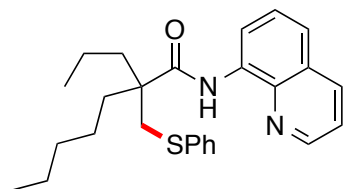

**2h:** 2-((phenylthio)methyl)-2-propyl-N-(quinolin-8-yl)heptanamide was prepared following the general procedure **1.4 Condition A** and purified by flash chromatography (Hexane-EtOAc, v/v 20/1) as colorless oil; Isolated yield 72%;

**<sup>1</sup>H NMR** (400 MHz; CDCl<sub>3</sub>): δ 10.32 (s, 1H), 8.81 (dd, *J* = 4.2, 1.7 Hz, 1H), 8.74 (dd, *J* = 7.0, 2.0 Hz, 1H), 8.15 (dd, *J* = 8.3, 1.7 Hz, 1H), 7.54-7.41 (m, 3H), 7.23-7.19 (m, 2H),



7.14-7.10 (m, 1H), 3.42 (s, 2H), 1.97-1.89 (m,  $J = 5.7$  Hz, 2H), 1.85-1.76 (m,  $J = 5.3$  Hz, 2H), 1.36-1.24 (m, 8H), 0.89 (t,  $J = 7.3$  Hz, 3H), 0.83-0.80 (m, 3H).

$^{13}\text{C}$  NMR (101 MHz;  $\text{CDCl}_3$ ):  $\delta$  174.1, 148.2, 138.8, 137.0, 136.2, 134.4, 130.0, 128.7, 127.9, 127.4, 126.0, 121.5, 121.3, 116.4, 51.5, 39.3, 38.4, 35.9, 32.2, 23.8, 22.4, 17.5, 14.5, 14.0

HRMS Calculated for  $[\text{C}_{26}\text{H}_{33}\text{N}_2\text{OS}]^+$ : 421.2308, Found: 421.2315

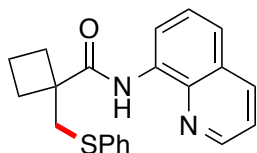

**2i**

**2i: 1-((phenylthio)methyl)-N-(quinolin-8-yl)cyclobutanecarboxamide** was prepared following the general procedure **1.4 Condition A** and purified by flash chromatography (Hexane-EtOAc, v/v 20/1) as colorless oil; Isolated yield 63%;

$^1\text{H}$  NMR (400 MHz;  $\text{CDCl}_3$ ):  $\delta$  10.19 (s, 1H), 8.82 (dd,  $J = 4.2, 1.7$  Hz, 1H), 8.69 (dd,  $J = 5.6, 3.4$  Hz, 1H), 8.16 (dd,  $J = 8.3, 1.7$  Hz, 1H), 7.50-7.44 (m, 3H), 7.35-7.33 (m, 2H), 7.09-7.05 (m, 2H), 7.02-7.00 (m, 1H), 3.56 (s, 2H), 2.67 (ddd,  $J = 12.7, 9.5, 7.5$  Hz, 2H), 2.30-2.23 (m, 2H), 2.04 (ddt,  $J = 19.6, 10.7, 5.1$  Hz, 2H).

$^{13}\text{C}$  NMR (101 MHz;  $\text{CDCl}_3$ ):  $\delta$  174.2, 148.2, 138.7, 136.2, 134.2, 130.0, 128.6, 127.8, 127.3, 126.0, 121.49, 121.37, 116.3, 50.3, 42.9, 30.3, 15.1

HRMS Calculated for  $[\text{C}_{21}\text{H}_{21}\text{N}_2\text{OS}]^+$ : 349.1369, Found: 349.1373.

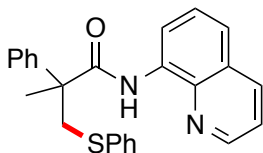

**2j**

**2j: 2-methyl-2-phenyl-3-(phenylthio)-N-(quinolin-8-yl)propanamide** was prepared following the general procedure **1.4 Condition A** and purified by flash chromatography (Hexane-EtOAc, v/v 20/1) as colorless oil; Isolated yield 53%;

$^1\text{H}$  NMR (400 MHz;  $\text{CDCl}_3$ ):  $\delta$  9.91 (s, 1H), 8.75 (dd,  $J = 7.5, 1.5$  Hz, 1H), 8.58 (dd,  $J = 4.2, 1.7$  Hz, 1H), 8.08 (dd,  $J = 8.3, 1.7$  Hz, 1H), 7.54-7.44 (m, 4H), 7.40-7.29 (m, 6H), 7.20-7.16 (m, 2H), 7.12-7.08 (m, 1H), 3.86-3.71 (ABq,  $J = 12.8$  Hz, 2H), 1.97 (s, 3H).

$^{13}\text{C}$  NMR (101 MHz;  $\text{CDCl}_3$ ):  $\delta$  173.8, 148.1, 141.7, 138.6, 137.4, 136.1, 134.4, 129.8, 128.80, 128.71, 127.8, 127.6, 127.2, 126.9, 126.0, 121.47, 121.44, 116.1, 52.9, 44.9, 23.2

HRMS Calculated for  $[\text{C}_{25}\text{H}_{23}\text{N}_2\text{OS}]^+$ : 399.1526, Found: 399.1530.

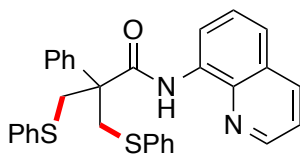

**2j-di**

**2j-di: 2-phenyl-3-(phenylthio)-2-((phenylthio)methyl)-N-(quinolin-8-yl)propanamide** was prepared following the general procedure **1.4 Condition A** and purified by flash chromatography (Hexane-EtOAc, v/v 20/1) as colorless oil; Isolated yield 27%;

**<sup>1</sup>H NMR** (400 MHz; CDCl<sub>3</sub>): δ 9.93 (s, 1H), 8.64 (dd, *J* = 7.2, 1.8 Hz, 1H), 8.53 (dd, *J* = 4.2, 1.7 Hz, 1H), 8.06 (dd, *J* = 8.3, 1.7 Hz, 1H), 7.50-7.43 (m, 5H), 7.37-7.31 (m, 3H), 7.30 (s, 4H), 7.08-6.98 (m, 5H), 4.03 (s, 4H).

**<sup>13</sup>C NMR** (101 MHz; CDCl<sub>3</sub>): δ 171.4, 148.0, 139.8, 138.5, 136.2, 135.9, 134.1, 130.5, 129.4, 128.79, 128.59, 128.0, 127.22, 127.18, 126.2, 121.47, 121.37, 116.3, 56.7, 41.7

**HRMS** Calculated for [C<sub>31</sub>H<sub>27</sub>N<sub>2</sub>OS<sub>2</sub>]<sup>+</sup>: 507.1559, Found: 507.1568.

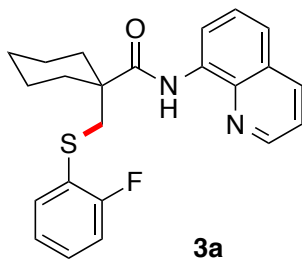

**3a: 1-(((2-fluorophenyl)thio)methyl)-N-(quinolin-8-yl)cyclohexanecarboxamide** was prepared following the general procedure **1.4 Condition B** and purified by flash chromatography (Hexane-EtOAc, v/v 20/1) as colorless oil; Isolated yield 80%;

**<sup>1</sup>H NMR** (400 MHz; CDCl<sub>3</sub>): δ 10.37 (s, 1H), 8.82 (dd, *J* = 4.2, 1.7 Hz, 1H), 8.66 (t, *J* = 4.5 Hz, 1H), 8.15 (dd, *J* = 8.3, 1.7 Hz, 1H), 7.48-7.44 (m, 3H), 7.34-7.30 (m, 1H), 6.99-6.94 (m, 1H), 6.81-6.76 (m, 2H), 3.30 (s, 2H), 2.34-2.30 (m, 2H), 1.75-1.58 (m, 7H), 1.43-1.38 (m, 1H).

**<sup>13</sup>C NMR** (101 MHz; CDCl<sub>3</sub>): δ 173.2, 161.5 (d, *J* = 244.4 Hz), 148.2, 138.8, 136.1, 134.3, 132.93 (d, *J* = 1.9 Hz), 128.26, 128.18, 127.8, 127.3, 124.08 (d, *J* = 3.7 Hz), 123.24, 121.5, 121.3, 116.4, 115.34 (d, *J* = 22.2 Hz), 49.0, 43.6, 33.7, 25.7, 22.8

**HRMS** Calculated for [C<sub>23</sub>H<sub>24</sub>FN<sub>2</sub>OS]<sup>+</sup>: 395.1588, Found: 395.2595.

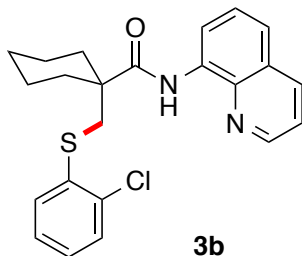

**3b: 1-(((2-chlorophenyl)thio)methyl)-N-(quinolin-8-yl)cyclohexanecarboxamide** was prepared following the general procedure **1.4 Condition B** and purified by flash chromatography (Hexane-EtOAc, v/v 20/1) as colorless oil; Isolated yield 78%;

**<sup>1</sup>H NMR** (400 MHz; CDCl<sub>3</sub>): δ 10.40 (s, 1H), 8.81 (dd, *J* = 4.2, 1.7 Hz, 1H), 8.69 (dd, *J* = 5.4, 3.6 Hz, 1H), 8.13 (dd, *J* = 8.3, 1.7 Hz, 1H), 7.48-7.42 (m, 3H), 7.34 (dd, *J* = 7.9, 1.6 Hz, 1H), 7.10 (dd, *J* = 7.9, 1.4 Hz, 1H), 6.99-6.95 (m, 1H), 6.89 (td, *J* = 7.6, 1.6 Hz, 1H), 3.32 (s, 2H), 2.39-2.34 (m, 2H), 1.78-1.58 (m, 7H), 1.45-1.39 (m, 1H).

**<sup>13</sup>C NMR** (101 MHz; CDCl<sub>3</sub>): δ 173.2, 148.2, 138.8, 136.1, 135.5, 134.39, 134.29, 130.3, 129.3, 127.8, 127.3, 126.80, 126.66, 121.47, 121.35, 116.5, 48.8, 43.12, 33.8, 25.7, 22.8.

**HRMS** Calculated for [C<sub>23</sub>H<sub>24</sub>ClN<sub>2</sub>OS]<sup>+</sup>: 411.1292, Found: 411.1297.

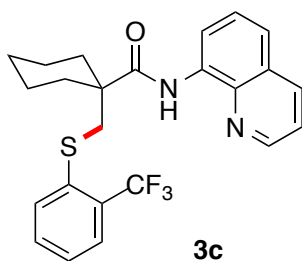

**3c:** N-(quinolin-8-yl)-1-(((2-(trifluoromethyl)phenyl)thio)methyl)cyclohexanecarboxamide was prepared following the general procedure **1.4 Condition B** and purified by flash chromatography (Hexane-EtOAc, v/v 20/1) as colorless oil; Isolated yield 42%;

**<sup>1</sup>H-NMR** (400 MHz; CDCl<sub>3</sub>): δ 10.40 (s, 1H), 8.80 (dd, *J* = 4.2, 1.7 Hz, 1H), 8.71 (dd, *J* = 5.7, 3.3 Hz, 1H), 8.14 (dd, *J* = 8.3, 1.7 Hz, 1H), 7.55 (d, *J* = 7.9 Hz, 1H), 7.52-7.40 (m, 3H), 7.31-7.28 (m, 1H), 7.10-7.05 (m, 1H), 3.36 (s, 2H), 2.37-2.31 (m, 2H), 1.79-1.57 (m, 7H), 1.43-1.36 (m, 1H).

**<sup>13</sup>C NMR** (101 MHz; CDCl<sub>3</sub>): δ 173.3, 148.3, 138.8, 136.1, 134.3, 132.3, 131.8, 127.8, 127.3, 126.38 (q, *J* = 5.8 Hz), 125.8, 125.0, 123.7 (q, *J* = 272.3 Hz), 121.51, 121.44, 116.5, 49.0, 45.01, 44.99, 33.6, 25.7, 22.8

**HRMS** Calculated for [C<sub>24</sub>H<sub>24</sub>F<sub>3</sub>N<sub>2</sub>OS]<sup>+</sup>: 445.1556, Found: 455.1559

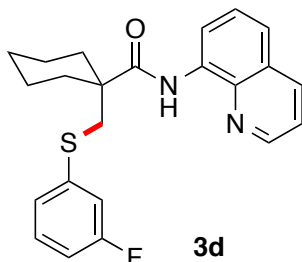

**3d:** 1-(((3-fluorophenyl)thio)methyl)-N-(quinolin-8-yl)cyclohexanecarboxamide was prepared following the general procedure **1.4 Condition B** and purified by flash chromatography (Hexane-EtOAc, v/v 20/1) as colorless oil; Isolated yield 75%;

**<sup>1</sup>H-NMR** (400 MHz; CDCl<sub>3</sub>): δ 10.38 (s, 1H), 8.82 (dd, *J* = 4.2, 1.7 Hz, 1H), 8.70 (dd, *J* = 5.2, 3.8 Hz, 1H), 8.15 (dd, *J* = 8.3, 1.7 Hz, 1H), 7.49-7.43 (m, 3H), 7.05-6.95 (m, 3H), 6.66-6.61 (m, 1H), 3.31 (s, 2H), 2.34 (dd, *J* = 12.9, 4.5 Hz, 2H), 1.72-1.56 (m, 8H).

**<sup>13</sup>C NMR** (101 MHz; CDCl<sub>3</sub>): δ 173.1, 163.48 (d, *J* = 246.6 Hz), 148.2, 139.00 (d, *J* = 7.6 Hz), 138.796, 136.2, 134.2, 129.72 (d, *J* = 8.5 Hz), 127.9, 127.3, 124.976 (d, *J* = 2.8 Hz), 121.50, 121.38, 116.39, 116.24 (d, *J* = 23.2 Hz), 112.66 (d, *J* = 21.2 Hz), 49.0, 44.1, 33.9, 25.7, 22.8.

**HRMS** Calculated for [C<sub>23</sub>H<sub>24</sub>FN<sub>2</sub>OS]<sup>+</sup>: 395.1588, Found: 395.1590.

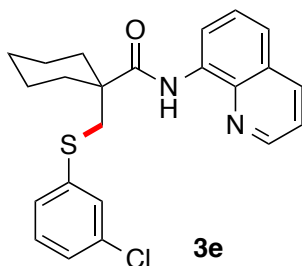

**3e: 1-(((3-chlorophenyl)thio)methyl)-N-(quinolin-8-yl)cyclohexanecarboxamide** was prepared following the general procedure **1.4 Condition B** and purified by flash chromatography (Hexane-EtOAc, v/v 20/1) as colorless oil; Isolated yield 81%;

**<sup>1</sup>H-NMR** (400 MHz; CDCl<sub>3</sub>): δ 10.37 (s, 1H), 8.82 (dd, *J* = 4.2, 1.7 Hz, 1H), 8.68 (t, *J* = 4.5 Hz, 1H), 8.14 (dd, *J* = 8.3, 1.6 Hz, 1H), 7.49-7.43 (m, 3H), 7.24 (t, *J* = 1.8 Hz, 1H), 7.14 (dt, *J* = 7.5, 1.5 Hz, 1H), 6.95-6.87 (m, 2H), 3.31 (s, 2H), 2.38-2.32 (m, 2H), 1.70-1.59 (m, 8H), 1.42-1.38 (m, 1H).

**<sup>13</sup>C NMR** (101 MHz; CDCl<sub>3</sub>): δ 173.0, 148.3, 138.78, 138.60, 136.2, 134.25, 134.17, 129.46, 129.26, 127.9, 127.7, 127.3, 125.9, 121.49, 121.38, 116.4, 48.9, 44.2, 33.9, 25.7, 22.8

**HRMS** Calculated for [C<sub>23</sub>H<sub>24</sub>ClN<sub>2</sub>OS]<sup>+</sup>: 411.1292, Found: 411.1203.

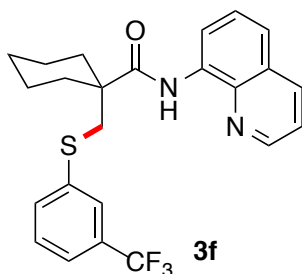

**3f: N-(quinolin-8-yl)-1-(((3-(trifluoromethyl)phenyl)thio)methyl)cyclohexanecarboxamide** was prepared following the general procedure **1.4 Condition B** and purified by flash chromatography (Hexane-EtOAc, v/v 20/1) as colorless oil; Isolated yield 70%;

**<sup>1</sup>H-NMR** (400 MHz; CDCl<sub>3</sub>): δ 10.38 (s, 1H), 8.81 (dd, *J* = 4.2, 1.7 Hz, 1H), 8.65 (dd, *J* = 5.6, 3.4 Hz, 1H), 8.14 (dd, *J* = 8.3, 1.7 Hz, 1H), 7.50-7.42 (m, 5H), 7.12 (dt, *J* = 17.2, 8.3 Hz, 2H), 3.34 (s, 2H), 2.37 (dd, *J* = 15.4, 7.3 Hz, 2H), 1.72-1.56 (m, 7H), 1.44-1.36 (m, 1H).

**<sup>13</sup>C NMR** (101 MHz; CDCl<sub>3</sub>): δ 172.9, 148.2, 138.7, 138.0, 136.2, 134.1, 132.5, 131.0-130.7 (q, *J* = 32.1 Hz), 128.8, 127.8, 127.3, 125.98 (q, *J* = 5.8 Hz), 123.6 (q, *J* = 271.6 Hz), 122.390 (q, *J* = 5.8 Hz), 121.50, 121.41, 116.3, 48.9, 44.1, 33.9, 25.7, 22.8

**HRMS** Calculated for [C<sub>24</sub>H<sub>27</sub>N<sub>2</sub>OS]<sup>+</sup>: 445.1556, Found: 455.1564.

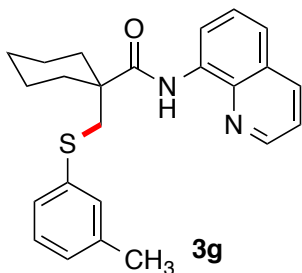

**3g: N-(quinolin-8-yl)-1-((m-tolylthio)methyl)cyclohexanecarboxamide** was prepared following the general procedure **1.4 Condition B** and purified by flash chromatography (Hexane-EtOAc, v/v 20/1) as colorless oil; Isolated yield 37%;

**<sup>1</sup>H-NMR** (400 MHz; CDCl<sub>3</sub>): δ 10.38 (s, 1H), 8.82 (dd, *J* = 4.2, 1.7 Hz, 1H), 8.70 (dd, *J* = 5.7, 3.3 Hz, 1H), 8.15 (dd, *J* = 8.3, 1.7 Hz, 1H), 7.49-7.43 (m, 3H), 7.12-7.08 (m, 2H), 6.94 (t, *J* = 7.6 Hz, 1H), 6.77-6.75 (m, 1H), 3.30 (s, 2H), 2.36-2.32 (m, 3H), 2.07 (s, 3H), 1.73-1.58 (m, 7H), 1.39 (dd, *J* = 5.9, 4.2 Hz, 1H).

**<sup>13</sup>C NMR** (101 MHz; CDCl<sub>3</sub>): δ 173.4, 148.2, 138.8, 138.3, 136.26, 136.17, 134.4, 130.6, 128.4, 127.8, 127.3, 127.0, 126.7, 121.4, 121.2, 116.4, 49.0, 44.6, 33.8, 25.8, 22.9, 21.0  
**HRMS** Calculated for [C<sub>24</sub>H<sub>27</sub>N<sub>2</sub>OS]<sup>+</sup>: 391.1837, Found: 391.1848.

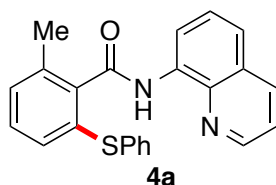

**4a: 2-methyl-6-(phenylthio)-N-(quinolin-8-yl)benzamide** was prepared following the general procedure **1.3** and purified by flash chromatography (Hexane-EtOAc, v/v 20/1) as colorless solid; Isolated yield 89%;

**<sup>1</sup>H-NMR** (400 MHz; CDCl<sub>3</sub>): δ 9.94 (s, 1H), 8.96 (dd, *J* = 7.4, 1.6 Hz, 1H), 8.68 (dd, *J* = 4.2, 1.7 Hz, 1H), 8.15 (dd, *J* = 8.3, 1.7 Hz, 1H), 7.61-7.53 (m, 2H), 7.41 (dd, *J* = 8.3, 4.2 Hz, 1H), 7.34-7.31 (m, 2H), 7.25-7.12 (m, 6H), 2.47 (s, 3H).

**<sup>13</sup>C NMR** (101 MHz; CDCl<sub>3</sub>): δ 166.94, 166.94, 148.13, 148.13, 140.11, 140.11, 138.46, 138.46, 136.22, 136.22, 136.13, 136.13, 135.68, 135.68, 134.28, 134.28, 133.00, 133.00, 131.31, 131.31, 130.41, 130.41, 129.65, 129.65, 129.55, 129.55, 129.06, 129.06, 127.92, 127.92, 127.39, 127.39, 127.05, 127.05, 121.93, 121.93, 121.54, 121.54, 116.87, 116.87, 19.59, 19.59.

**HRMS** Calculated for [C<sub>23</sub>H<sub>19</sub>N<sub>2</sub>OS]<sup>+</sup>: 371.1213, Found: 371.1217.

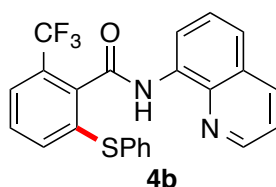

**4b: 2-(phenylthio)-N-(quinolin-8-yl)-6-(trifluoromethyl)benzamide** was prepared following the general procedure **1.3** and purified by flash chromatography (Hexane-EtOAc, v/v 20/1) as colorless solid; Isolated yield 85%;

**<sup>1</sup>H-NMR** (400 MHz; CDCl<sub>3</sub>): δ 10.07 (s, 1H), 8.96 (dd, *J* = 7.1, 1.8 Hz, 1H), 8.73 (dd, *J* = 4.2, 1.7 Hz, 1H), 8.17 (dd, *J* = 8.3, 1.6 Hz, 1H), 7.63-7.57 (m, 3H), 7.46-7.41 (m, 5H), 7.30-7.25 (m, 3H).

**<sup>13</sup>C NMR** (101 MHz; CDCl<sub>3</sub>): δ 164.0, 148.2, 138.4, 137.6, 136.3, 134.8, 134.1, 133.5, 133.0, 129.8, 129.5, 128.32 (q, *J* = 31.2 Hz), 128.28, 128.0, 127.4, 124.6 (q, *J* = 4.7 Hz), 123.4 (q, *J* = 272.4 Hz), 122.3, 121.6, 117.1.

**HRMS** Calculated for [C<sub>23</sub>H<sub>16</sub>F<sub>3</sub>N<sub>2</sub>OS]<sup>+</sup>: 425.0930, Found: 425.0939

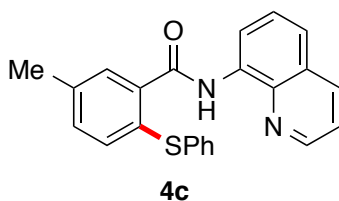

**4c: 5-methyl-2-(phenylthio)-N-(quinolin-8-yl)benzamide** was prepared following the general procedure **1.3** and purified by flash chromatography (Hexane-EtOAc, v/v 20/1) as colorless oil; Isolated yield 78%;

**<sup>1</sup>H-NMR** (400 MHz; CDCl<sub>3</sub>): δ 10.51 (s, 1H), 8.91 (dd, *J* = 7.3, 1.6 Hz, 1H), 8.74 (dd, *J* = 4.2, 1.7 Hz, 1H), 8.17 (dd, *J* = 8.3, 1.7 Hz, 1H), 7.63-7.62 (m, 1H), 7.59-7.52 (m, 2H), 7.44 (dd, *J* = 8.3, 4.2 Hz, 1H), 7.39-7.36 (m, 2H), 7.27-7.25 (m, 2H), 7.24-7.19 (m, 3H), 2.41 (s, 3H).

**<sup>13</sup>C NMR** (101 MHz; CDCl<sub>3</sub>): δ 166.5, 148.2, 137.34, 137.16, 136.3, 135.4, 134.6, 132.4, 132.11, 132.00, 131.82, 129.27, 129.19, 127.9, 127.42, 127.35, 121.8, 121.6, 116.8, 21.0

**HRMS** Calculated for [C<sub>23</sub>H<sub>19</sub>N<sub>2</sub>OS]<sup>+</sup>: 371.1213, Found: 371.1221.

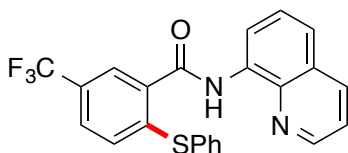

**4d**

**4d: 2-(phenylthio)-N-(quinolin-8-yl)-5-(trifluoromethyl)benzamide** was prepared following the general procedure **1.3** and purified by flash chromatography (Hexane-EtOAc, v/v 20/1) as colorless oil; Isolated yield 65%;

**<sup>1</sup>H-NMR** (400 MHz; CDCl<sub>3</sub>): δ 10.55 (s, 1H), 8.93 (dd, *J* = 6.7, 2.3 Hz, 1H), 8.82 (dd, *J* = 4.2, 1.7 Hz, 1H), 8.21 (dd, *J* = 8.3, 1.7 Hz, 1H), 8.00 (t, *J* = 0.7 Hz, 1H), 7.64-7.58 (m, 2H), 7.55-7.47 (m, 4H), 7.41-7.38 (m, 3H), 7.12 (d, *J* = 8.4 Hz, 1H).

**<sup>13</sup>C NMR** (101 MHz; CDCl<sub>3</sub>): δ 165.0, 148.4, 143.9, 138.6, 136.4, 134.96, 134.76, 134.2, 132.0, 129.8, 129.27, 129.23, 128.0, 127.7 (q, *J* = 33.3 Hz), 127.40, 127.3 (q, *J* = 3.5 Hz), 125.0 (q, *J* = 3.5 Hz), 123.7 (q, *J* = 271.0 Hz), 122.3, 121.8, 117.0

**HRMS** Calculated for [C<sub>23</sub>H<sub>15</sub>F<sub>3</sub>N<sub>2</sub>OSNa]<sup>+</sup>: 447.0749, Found: 447.0749

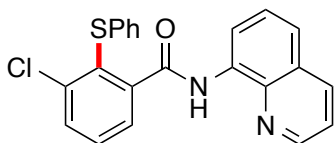

**4e**

**4e: 3-chloro-2-(phenylthio)-N-(quinolin-8-yl)benzamide** was prepared following the general procedure **1.3** and purified by flash chromatography (Hexane-EtOAc, v/v 20/1) as colorless solid; Isolated yield 81%;

**<sup>1</sup>H-NMR** (400 MHz; CDCl<sub>3</sub>): δ 10.25 (s, 1H), 8.80 (dd, *J* = 6.4, 2.6 Hz, 1H), 8.62 (dd, *J* = 4.2, 1.7 Hz, 1H), 8.14 (dd, *J* = 8.3, 1.7 Hz, 1H), 7.64 (ddd, *J* = 13.6, 7.8, 1.4 Hz, 2H), 7.55-7.51 (m, 2H), 7.46 (d, *J* = 7.7 Hz, 1H), 7.43-7.39 (m, 2H), 7.17-7.10 (m, 4H), 7.07-7.03 (m, 1H).

**<sup>13</sup>C NMR** (101 MHz; CDCl<sub>3</sub>): δ 165.8, 148.1, 144.5, 140.8, 138.4, 136.2, 135.7, 134.2, 131.9, 130.3, 129.9, 128.9, 128.7, 127.8, 127.3, 126.2, 122.0, 121.6, 116.8

**HRMS** Calculated for [C<sub>22</sub>H<sub>16</sub>ClN<sub>2</sub>OS]<sup>+</sup>: 391.0666, Found: 391.0678.

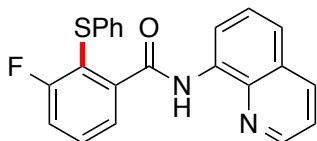

**4f**

**4f: 3-fluoro-2-(phenylthio)-N-(quinolin-8-yl)benzamide** was prepared following the general procedure **1.3** and purified by flash chromatography (Hexane-EtOAc, v/v 20/1) as colorless solid; Isolated yield 80%;

**<sup>1</sup>H-NMR** (400 MHz; CDCl<sub>3</sub>): δ 10.42 (s, 1H), 8.63 (dd, *J* = 4.2, 1.7 Hz, 1H), 8.14 (dd, *J* = 8.3, 1.7 Hz, 1H), 7.62-7.58 (m, 1H), 7.56-7.46 (m, 3H), 7.41 (dd, *J* = 8.3, 4.2 Hz, 1H), 7.27-7.22 (m, 3H), 7.17-7.13 (m, 2H), 7.11-7.07 (m, 1H).

**<sup>13</sup>C NMR** (101 MHz; CDCl<sub>3</sub>): δ 165.2, 162.91 (d, *J* = 248.8 Hz), 148.2, 143.3, 138.5, 136.2, 135.5, 134.3, 130.92 (d, *J* = 9.0 Hz), 129.02 (d, *J* = 23.7 Hz), 127.9, 127.3, 126.5, 124.55 (d, *J* = 3.8 Hz), 122.1, 121.6, 119.50, 119.30, 117.91 (d, *J* = 23.9 Hz), 116.8

**HRMS** Calculated for [C<sub>22</sub>H<sub>16</sub>FN<sub>2</sub>OS]<sup>+</sup>: 375.0962, Found: 375.0969.

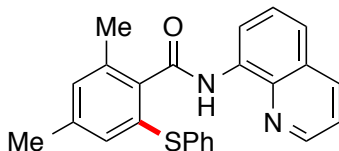

**4g**

**4g: 2,4-dimethyl-6-(phenylthio)-N-(quinolin-8-yl)benzamide** was prepared following the general procedure **1.3** and purified by flash chromatography (Hexane-EtOAc, v/v 20/1) as colorless solid; Isolated yield 91%;

**<sup>1</sup>H-NMR** (400 MHz; CDCl<sub>3</sub>): δ 9.91 (s, 1H), 8.94 (dd, *J* = 7.4, 1.6 Hz, 1H), 8.66 (dd, *J* = 4.2, 1.7 Hz, 1H), 8.15 (dd, *J* = 8.3, 1.7 Hz, 1H), 7.60-7.52 (m, 2H), 7.41 (dd, *J* = 8.3, 4.2 Hz, 1H), 7.32-7.30 (m, 2H), 7.21-7.15 (m, 2H), 7.15-7.11 (m, 1H), 7.07-7.03 (m, 2H), 2.43 (s, 3H), 2.29 (s, 3H).

**<sup>13</sup>C NMR** (101 MHz; CDCl<sub>3</sub>): δ 167.2, 148.1, 139.7, 138.5, 137.9, 136.19, 136.11, 136.03, 134.4, 132.3, 131.2, 130.9, 130.7, 129.0, 127.9, 127.4, 126.8, 121.8, 121.5, 116.8, 21.1, 19.5

**HRMS** Calculated for [C<sub>24</sub>H<sub>21</sub>N<sub>2</sub>OS]<sup>+</sup>: 385.1369, Found: 385.1376.

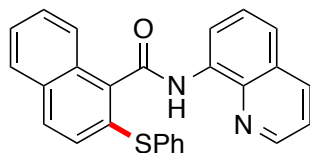

**4h**

**4h: 2-(phenylthio)-N-(quinolin-8-yl)-1-naphthamide** was prepared following the general procedure **1.3** and purified by flash chromatography (Hexane-EtOAc, v/v 20/1) as colorless solid; Isolated yield 90%;

**<sup>1</sup>H-NMR** (400 MHz; CDCl<sub>3</sub>): δ 10.21 (s, 1H), 9.11 (dd, *J* = 7.5, 1.4 Hz, 1H), 8.63 (dd, *J* = 4.2, 1.7 Hz, 1H), 8.16 (dd, *J* = 8.3, 1.6 Hz, 1H), 8.06-8.04 (m, 1H), 7.86-7.81 (m, 2H), 7.66-7.56 (m, 3H), 7.53-7.49 (m, 2H), 7.42-7.38 (m, 4H), 7.27-7.18 (m, 4H).

$^{13}\text{C}$  NMR (101 MHz;  $\text{CDCl}_3$ ):  $\delta$  166.5, 148.2, 138.5, 137.5, 136.2, 134.4, 132.4, 131.5, 130.78, 130.63, 130.0, 129.34, 129.15, 128.08, 127.97, 127.7, 127.44, 127.24, 126.8, 125.3, 122.1, 121.6, 117.0.

HRMS Calculated for  $[\text{C}_{26}\text{H}_{19}\text{N}_2\text{OS}]^+$ : 407.1212, Found: 407.1190.

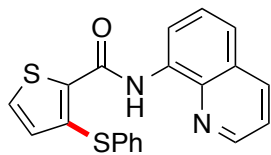

**4i**

**4i: 3-(phenylthio)-N-(quinolin-8-yl)thiophene-2-carboxamide** was prepared following the general procedure **1.3** and purified by flash chromatography (Hexane-EtOAc, v/v 20/1) as colorless oil; Isolated yield 72%;

$^1\text{H}$ -NMR (400 MHz;  $\text{CDCl}_3$ ):  $\delta$  11.71 (s, 1H), 8.89 (dd,  $J = 7.3, 1.7$  Hz, 1H), 8.74 (dd,  $J = 4.2, 1.7$  Hz, 1H), 8.14 (dd,  $J = 8.3, 1.7$  Hz, 1H), 7.55-7.49 (m, 3H), 7.45-7.40 (m, 3H), 7.32-7.24 (m, 3H), 6.98 (d,  $J = 5.2$  Hz, 1H).

$^{13}\text{C}$  NMR (101 MHz;  $\text{CDCl}_3$ ):  $\delta$  159.8, 148.3, 139.0, 138.3, 136.1, 135.1, 134.9, 133.4, 131.8, 130.3, 129.44, 129.27, 128.0, 127.35, 127.33, 121.9, 121.5, 117.3

HRMS Calculated for  $[\text{C}_{20}\text{H}_{15}\text{N}_2\text{OS}_2]^+$ : 363.0620, Found: 363.0627

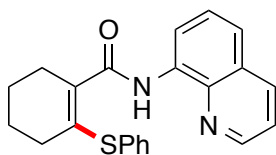

**4j**

**4j: 2-(phenylthio)-N-(quinolin-8-yl)cyclohex-1-enecarboxamide** was prepared following the general procedure **1.3** and purified by flash chromatography (Hexane-EtOAc, v/v 20/1) as colorless oil; Isolated yield 82%;

$^1\text{H}$ -NMR (400 MHz;  $\text{CDCl}_3$ ):  $\delta$  10.24 (s, 1H), 8.87 (dd,  $J = 7.5, 1.5$  Hz, 1H), 8.72 (dd,  $J = 4.2, 1.7$  Hz, 1H), 8.14 (dd,  $J = 8.3, 1.7$  Hz, 1H), 7.53-7.47 (m, 4H), 7.44-7.40 (m, 1H), 7.35-7.27 (m, 3H), 2.66 (tt,  $J = 6.1, 2.3$  Hz, 2H), 2.21 (tt,  $J = 6.1, 2.3$  Hz, 2H), 1.80-1.68 (m, 4H).

$^{13}\text{C}$  NMR (101 MHz;  $\text{CDCl}_3$ ):  $\delta$  167.8, 148.0, 136.9, 136.6, 136.3, 134.6, 133.7, 132.7, 131.5, 129.4, 128.9, 127.9, 127.5, 121.49, 121.41, 116.6, 77.3, 77.0, 76.7, 31.3, 28.4, 23.3, 21.9

HRMS Calculated for  $[\text{C}_{22}\text{H}_{21}\text{N}_2\text{OS}]^+$ : 361.1369, Found: 361.1371.

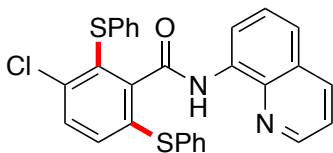

**4k**

**4k: 3-chloro-2,6-bis(phenylthio)-N-(quinolin-8-yl)benzamide** was prepared following the general procedure **1.3** with 4 equiv. PhSH, 7 equiv. LiOtBu, and 15 mol%



NiCl<sub>2</sub>(DME) and purified by flash chromatography (Hexane-EtOAc, v/v 20/1) as colorless oil; Isolated yield 77%;

**<sup>1</sup>H-NMR** (400 MHz; CDCl<sub>3</sub>): δ 9.97 (s, 1H), 8.98 (dd, *J* = 7.2, 1.7 Hz, 1H), 8.68 (dd, *J* = 4.2, 1.7 Hz, 1H), 8.20 (dd, *J* = 8.3, 1.7 Hz, 1H), 7.65-7.58 (m, 2H), 7.52-7.45 (m, 4H), 7.38-7.28 (m, 5H), 7.23-7.20 (m, 2H), 7.16-7.12 (m, 1H).

**<sup>13</sup>C NMR** (101 MHz; CDCl<sub>3</sub>): δ 164.4, 148.0, 145.7, 139.3, 138.3, 136.1, 135.4, 134.7, 134.0, 133.6, 133.3, 132.8, 131.4, 130.4, 129.5, 128.92, 128.87, 128.2, 127.8, 127.4, 126.4, 122.1, 121.5, 117.0

**HRMS** Calculated for [C<sub>28</sub>H<sub>19</sub>ClN<sub>2</sub>OS<sub>2</sub>Na]<sup>+</sup>: 521.0520, Found: 521.0527.

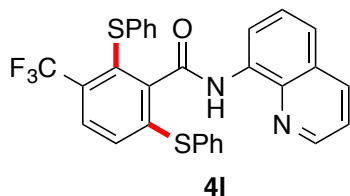

**4l: 2,6-bis(phenylthio)-N-(quinolin-8-yl)-3-(trifluoromethyl)benzamide** was prepared following the general procedure **1.3** with 4 equiv. PhSH, 7 equiv. LiOtBU, and 15 mol% NiCl<sub>2</sub>(DME) and purified by flash chromatography (Hexane-EtOAc, v/v 20/1) as colorless oil; Isolated yield 72%;

**<sup>1</sup>H-NMR** (400 MHz; CDCl<sub>3</sub>): δ 9.80 (s, 1H), 8.83 (dd, *J* = 6.8, 2.2 Hz, 1H), 8.62 (dd, *J* = 4.2, 1.7 Hz, 1H), 8.12 (dd, *J* = 8.3, 1.7 Hz, 1H), 7.64 (d, *J* = 8.6 Hz, 1H), 7.56-7.49 (m, 4H), 7.41-7.34 (m, 4H), 7.10 (dd, *J* = 8.5, 0.6 Hz, 1H), 7.06-7.03 (m, 2H), 7.00-6.95 (m, 2H).

**<sup>13</sup>C NMR** (101 MHz; CDCl<sub>3</sub>): δ 163.8, 148.0, 144.3, 143.5, 138.3, 136.7, 136.1, 134.7, 134.0, 131.6 (q, *J* = 30.0 Hz), 131.2, 130.03 (q, *J* = 1.6 Hz), 129.9, 129.33, 129.16, 128.8, 128.5, 127.83 (q, *J* = 5.5 Hz), 127.77, 127.3, 126.1, 123.3 (q, *J* = 271.0 Hz), 122.1, 121.5, 116.9

**HRMS** Calculated for [C<sub>29</sub>H<sub>20</sub>F<sub>3</sub>N<sub>2</sub>OS<sub>2</sub>]<sup>+</sup>: 533.0964, Found: 533.0969.

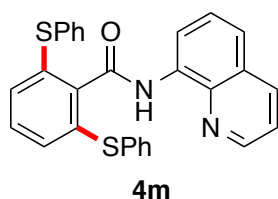

**4m: 2,6-bis(phenylthio)-N-(quinolin-8-yl)benzamide** was prepared following the general procedure **1.3** with 4 equiv. PhSH, 7 equiv. LiOtBU, and 15 mol% NiCl<sub>2</sub>(DME) and purified by flash chromatography (Hexane-EtOAc, v/v 20/1) as colorless oil; Isolated yield 83%;

**<sup>1</sup>H-NMR** (400 MHz; CDCl<sub>3</sub>): δ 10.05 (s, 1H), 8.97 (dd, *J* = 7.4, 1.4 Hz, 1H), 8.69 (dd, *J* = 4.2, 1.7 Hz, 1H), 8.15 (dd, *J* = 8.3, 1.6 Hz, 1H), 7.60-7.53 (m, 2H), 7.43-7.40 (m, 5H), 7.27-7.12 (m, 9H).

**<sup>13</sup>C NMR** (101 MHz; CDCl<sub>3</sub>): δ 165.2, 148.1, 138.5, 136.2, 135.7, 134.38, 134.23, 132.5, 130.16, 130.08, 129.3, 127.91, 127.75, 127.5, 122.0, 121.5, 117.0.

**HRMS** Calculated for [C<sub>28</sub>H<sub>21</sub>N<sub>2</sub>OS<sub>2</sub>]<sup>+</sup>: 465.1098, Found: 465.1090.

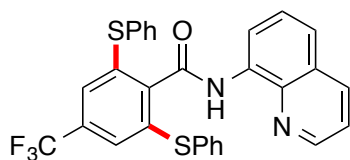

**4n**

**4n: 2,6-bis(phenylthio)-N-(quinolin-8-yl)-4-(trifluoromethyl)benzamide** was prepared following the general procedure **1.3** with 4 equiv. PhSH, 7 equiv. LiOtBU, and 15 mol% NiCl<sub>2</sub>(DME) and purified by flash chromatography (Hexane-EtOAc, v/v 20/1) as yellow solid; Isolated yield 81%;

**<sup>1</sup>H-NMR** (400 MHz; CDCl<sub>3</sub>): δ 10.12 (s, 1H), 8.96 (dd, *J* = 7.0, 2.0 Hz, 1H), 8.74 (dd, *J* = 4.2, 1.7 Hz, 1H), 8.18 (dd, *J* = 8.3, 1.7 Hz, 1H), 7.62-7.56 (m, 2H), 7.47-7.43 (m, 5H), 7.33-7.28 (m, 6H), 7.26-7.22 (m, 3H).

**<sup>13</sup>C NMR** (101 MHz; CDCl<sub>3</sub>): δ 164.0, 148.6, 148.2, 138.5, 138.0, 136.6, 136.3, 136.2, 133.9, 133.3, 132.5, 131.1, 129.66, 129.51, 128.7, 128.02-127.98(q, *J* = 4.4 Hz), 127.9, 127.4, 125.1(q, *J* = 3.7 Hz), 123.1(q, *J* = 265.6 Hz), 122.4, 121.7, 121.60-121.23 (q, *J* = 37.3 Hz), 117.2

**HRMS** Calculated for [C<sub>29</sub>H<sub>20</sub>F<sub>3</sub>N<sub>2</sub>OS<sub>2</sub>]<sup>+</sup>: 533.0963, Found: 533.0977.

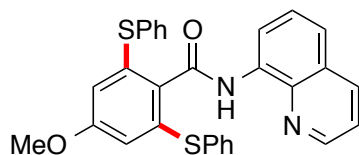

**4o**

**4o: 4-methoxy-2,6-bis(phenylthio)-N-(quinolin-8-yl)benzamide** was prepared following the general procedure **1.3** with 4 equiv. PhSH, 7 equiv. LiOtBU, and 15 mol% NiCl<sub>2</sub>(DME) and purified by flash chromatography (Hexane-EtOAc, v/v 20/1) as yellow solid; Isolated yield 77%;

**<sup>1</sup>H-NMR** (400 MHz; CDCl<sub>3</sub>): δ 10.07 (s, 1H), 8.95 (dd, *J* = 7.4, 1.5 Hz, 1H), 8.69 (dd, *J* = 4.2, 1.6 Hz, 1H), 8.14 (dd, *J* = 8.3, 1.6 Hz, 1H), 7.59-7.51 (m, 2H), 7.45-7.39 (m, 5H), 7.29-7.20 (m, 6H), 6.60 (s, 2H), 3.59 (s, 3H).

**<sup>13</sup>C NMR** (101 MHz; CDCl<sub>3</sub>): δ 165.2, 160.1, 148.0, 138.5, 137.3, 136.2, 134.3, 133.9, 132.8, 132.3, 129.3, 127.93, 127.88, 127.4, 121.8, 121.5, 116.9, 115.1, 55.3

**HRMS** Calculated for [C<sub>29</sub>H<sub>23</sub>N<sub>2</sub>O<sub>2</sub>S<sub>2</sub>]<sup>+</sup>: 495.1196, Found: 495.1203.

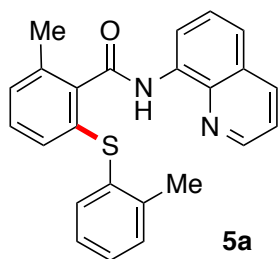

**5a**

**5a: 2-methyl-N-(quinolin-8-yl)-6-(o-tolylthio)benzamide** was prepared following the general procedure **1.3** and purified by flash chromatography (Hexane-EtOAc, v/v 20/1) as yellow solid; Isolated yield 86%;

**<sup>1</sup>H-NMR** (400 MHz; CDCl<sub>3</sub>): δ 9.98 (s, 1H), 8.98 (dd, *J* = 7.4, 1.6 Hz, 1H), 8.70 (dd, *J* = 4.2, 1.7 Hz, 1H), 8.16 (dd, *J* = 8.3, 1.6 Hz, 1H), 7.62-7.54 (m, 2H), 7.43 (dd, *J* = 8.3, 4.2 Hz, 1H), 7.35-7.33 (m, 1H), 7.20-7.10 (m, 5H), 6.94 (dd, *J* = 7.7, 0.6 Hz, 1H), 2.47 (s, 3H), 2.29 (s, 3H).

**<sup>13</sup>C NMR** (101 MHz; CDCl<sub>3</sub>): δ 19.59, 20.60, 116.88, 121.55, 121.91, 126.73, 127.42, 127.91, 128.29, 128.72, 129.58, 130.48, 133.35, 133.63, 133.76, 134.36, 136.10, 136.24, 138.51, 138.83, 140.12, 148.14, 166.95, 20.6, 19.6

**HRMS** Calculated for [C<sub>24</sub>H<sub>21</sub>N<sub>2</sub>OS]<sup>+</sup>: 385.1369, Found: 385.1373.

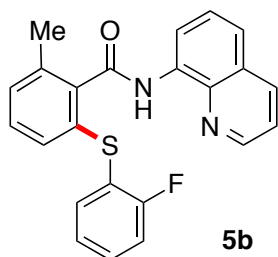

**5b: 2-((2-fluorophenyl)thio)-6-methyl-N-(quinolin-8-yl)benzamide** was prepared following the general procedure **1.3** and purified by flash chromatography (Hexane-EtOAc, v/v 20/1) as colorless oil; Isolated yield 84%;

**<sup>1</sup>H-NMR** (400 MHz; CDCl<sub>3</sub>): δ 9.98 (s, 1H), 8.96 (dd, *J* = 7.4, 1.6 Hz, 1H), 8.69 (dd, *J* = 4.2, 1.7 Hz, 1H), 8.15 (dd, *J* = 8.3, 1.6 Hz, 1H), 7.61-7.53 (m, 2H), 7.41 (dd, *J* = 8.3, 4.2 Hz, 1H), 7.32-7.25 (m, 2H), 7.22-7.13 (m, 3H), 7.02-6.93 (m, 2H), 2.47 (s, 3H).

**<sup>13</sup>C NMR** (101 MHz; CDCl<sub>3</sub>): δ 166.7, 161.15 (d, *J* = 246.3 Hz), 148.1, 140.2, 138.5, 136.2, 134.3, 133.74, 133.73, 131.5, 130.2, 129.84, 129.71, 129.33, 129.25, 127.9, 127.4, 124.635 (d, *J* = 3.8 Hz), 122.0, 121.6, 116.9, 115.78 (d, *J* = 22.0 Hz), 19.6

**HRMS** Calculated for [C<sub>23</sub>H<sub>18</sub>FN<sub>2</sub>OS]<sup>+</sup>: 389.1118, Found: 389.1122.

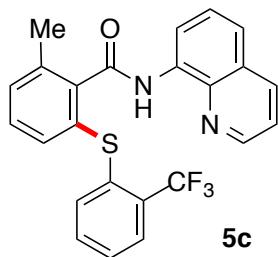

**5c: 2-methyl-N-(quinolin-8-yl)-6-((2-(trifluoromethyl)phenyl)thio)benzamide** was prepared following the general procedure **1.3** at 120 °C and purified by flash chromatography (Hexane-EtOAc, v/v 20/1) as colorless oil; Isolated yield 73%;

**<sup>1</sup>H-NMR** (400 MHz; CDCl<sub>3</sub>): δ 9.90 (s, 1H), 8.91 (dd, *J* = 7.1, 1.9 Hz, 1H), 8.66 (dd, *J* = 4.2, 1.7 Hz, 1H), 8.15 (dd, *J* = 8.3, 1.7 Hz, 1H), 7.59-7.51 (m, 3H), 7.43-7.34 (m, 3H), 7.32 (s, 3H), 7.21-7.18 (m, 1H), 2.49 (s, 3H).

<sup>13</sup>C NMR (101 MHz; CDCl<sub>3</sub>): δ 166.6, 148.1, 141.8, 138.5, 136.5, 136.3, 134.1, 132.8, 132.5, 132.2, 131.0, 130.8, 130.0, 127.9, 127.4, 126.4 (q, *J* = 3.7 Hz), 126.21, 123.6(q, *J* = 273.6 Hz), 122.0, 121.5, 117.0, 19.6

HRMS Calculated for [C<sub>24</sub>H<sub>18</sub>F<sub>3</sub>N<sub>2</sub>OS]<sup>+</sup>: 439.1086, Found: 439.1093.

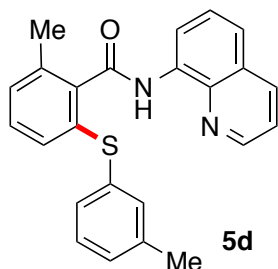

**5d: 2-methyl-N-(quinolin-8-yl)-6-(m-tolylthio)benzamide** was prepared following the general procedure **1.3** and purified by flash chromatography (Hexane-EtOAc, v/v 20/1) as colorless oil; Isolated yield 88%;

<sup>1</sup>H-NMR (400 MHz; CDCl<sub>3</sub>): δ 9.91 (s, 1H), 8.97 (dd, *J* = 7.4, 1.5 Hz, 1H), 8.68 (dd, *J* = 4.2, 1.7 Hz, 1H), 8.16 (dd, *J* = 8.3, 1.7 Hz, 1H), 7.62-7.53 (m, 2H), 7.42 (dd, *J* = 8.3, 4.2 Hz, 1H), 7.24-7.18 (m, 2H), 7.15-7.14 (m, 2H), 7.08 (dd, *J* = 9.9, 5.7 Hz, 1H), 6.94 (d, *J* = 7.2 Hz, 1H), 2.47 (s, 3H), 2.17 (s, 3H).

<sup>13</sup>C NMR (101 MHz; CDCl<sub>3</sub>): δ 167.0, 148.1, 138.9, 138.5, 136.26, 136.08, 135.2, 134.3, 133.4, 132.2, 130.3, 129.58, 129.40, 128.9, 128.7, 128.0, 127.4, 121.9, 121.5, 116.9, 21.2, 19.6

HRMS Calculated for [C<sub>24</sub>H<sub>21</sub>N<sub>2</sub>OS]<sup>+</sup>: 385.1369, Found: 385.1370.

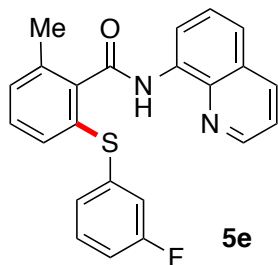

**5e: 2-((3-fluorophenyl)thio)-6-methyl-N-(quinolin-8-yl)benzamide** was prepared following the general procedure **1.3** and purified by flash chromatography (Hexane-EtOAc, v/v 20/1) as colorless oil; Isolated yield 84%;

<sup>1</sup>H-NMR (400 MHz; CDCl<sub>3</sub>): δ 9.87 (s, 1H), 8.93 (dd, *J* = 7.3, 1.6 Hz, 1H), 8.65 (dd, *J* = 4.2, 1.6 Hz, 1H), 8.15 (dd, *J* = 8.3, 1.6 Hz, 1H), 7.60-7.53 (m, 2H), 7.42 (t, *J* = 4.1 Hz, 1H), 7.31-7.28 (m, 3H), 7.12-7.08 (m, 1H), 7.01 (dt, *J* = 7.8, 1.3 Hz, 1H), 6.94 (dt, *J* = 9.3, 2.1 Hz, 1H), 6.76 (tdd, *J* = 8.3, 2.5, 0.9 Hz, 1H), 2.48 (s, 3H).

<sup>13</sup>C NMR (101 MHz; CDCl<sub>3</sub>): δ 166.7, 162.87 (d, *J* = 246.8 Hz), 148.1, 141.4, 139.1, 138.4, 136.5, 136.2, 134.2, 132.0, 130.78, 130.66, 130.11 (d, *J* = 8.3 Hz), 129.88, 127.9, 127.37, 127.34, 125.465 (d, *J* = 3.0 Hz), 122.0, 121.6, 116.8, 116.6, 113.504 (d, *J* = 21.2 Hz), 19.6

HRMS Calculated for [C<sub>23</sub>H<sub>18</sub>FN<sub>2</sub>OS]<sup>+</sup>: 389.1118, Found: 389.1112.

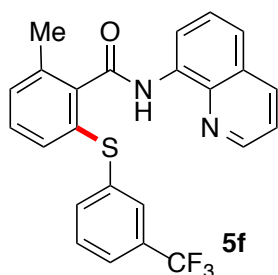

**5f: 2-methyl-N-(quinolin-8-yl)-6-((3-(trifluoromethyl)phenyl)thio)benzamide** was prepared following the general procedure **1.3** at 120 °C and purified by flash chromatography (Hexane-EtOAc, v/v 20/1) as colorless oil; Isolated yield 75%;

**<sup>1</sup>H-NMR** (400 MHz; CDCl<sub>3</sub>): δ 9.80 (s, 1H), 8.90 (dd, *J* = 7.2, 1.8 Hz, 1H), 8.57 (dd, *J* = 4.2, 1.7 Hz, 1H), 8.14 (dd, *J* = 8.3, 1.7 Hz, 1H), 7.59-7.52 (m, 2H), 7.44-7.34 (m, 5H), 7.26-7.22 (m, 2H), 2.50 (s, 3H).

**<sup>13</sup>C NMR** (101 MHz; CDCl<sub>3</sub>): δ 166.6, 148.1, 142.6, 142.3, 138.2, 136.9, 136.2, 134.0, 133.1, 131.4, 130.1, 129.2, 128.4, 127.87, 127.78, 127.34, 127.31, 126.6, 125.70 (q, *J* = 3.7 Hz), 124.0 (q, *J* = 270.2 Hz), 122.1, 116.8, 19.6

**HRMS** Calculated for [C<sub>24</sub>H<sub>18</sub>F<sub>3</sub>N<sub>2</sub>OS]<sup>+</sup>: 439.1086, Found: 439.1091.

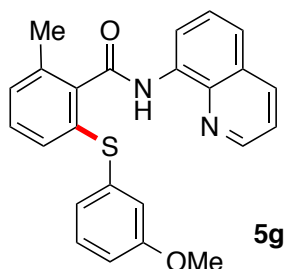

**5g: 2-((3-methoxyphenyl)thio)-6-methyl-N-(quinolin-8-yl)benzamide** was prepared following the general procedure **1.3** and purified by flash chromatography (Hexane-EtOAc, v/v 20/1) as colorless oil; Isolated yield 80%;

**<sup>1</sup>H-NMR** (400 MHz; CDCl<sub>3</sub>): δ 9.90 (s, 1H), 8.97 (dd, *J* = 7.4, 1.6 Hz, 1H), 8.66 (dd, *J* = 4.2, 1.7 Hz, 1H), 8.15 (dd, *J* = 8.3, 1.6 Hz, 1H), 7.61-7.53 (m, 2H), 7.41 (dd, *J* = 8.3, 4.2 Hz, 1H), 7.28-7.26 (m, 2H), 7.21 (td, *J* = 4.4, 0.9 Hz, 1H), 7.10 (t, *J* = 8.0 Hz, 1H), 6.90 (ddd, *J* = 7.7, 1.7, 0.9 Hz, 1H), 6.84 (dd, *J* = 2.4, 1.7 Hz, 1H), 6.65 (ddd, *J* = 8.3, 2.5, 0.9 Hz, 1H), 3.63 (s, 3H), 2.47 (s, 3H).

**<sup>13</sup>C NMR** (101 MHz; CDCl<sub>3</sub>): δ 166.9, 159.9, 148.1, 140.4, 138.4, 137.0, 136.20, 136.18, 134.3, 132.5, 130.8, 129.81, 129.79, 129.65, 127.9, 127.4, 123.3, 121.9, 121.5, 116.8, 116.0, 113.1, 55.1, 19.6

**HRMS** Calculated for [C<sub>24</sub>H<sub>21</sub>N<sub>2</sub>O<sub>2</sub>S]<sup>+</sup>: 401.1318, Found: 401.1320.

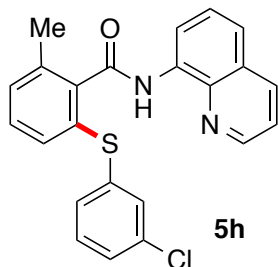

**5h:** 2-((3-chlorophenyl)thio)-6-methyl-N-(quinolin-8-yl)benzamide was prepared following the general procedure **1.3** and purified by flash chromatography (Hexane-EtOAc, v/v 20/1) as colorless oil; Isolated yield 72%;

**<sup>1</sup>H-NMR** (400 MHz; CDCl<sub>3</sub>): δ 9.85 (s, 1H), 8.92 (dd, *J* = 7.4, 1.6 Hz, 1H), 8.65 (dd, *J* = 4.2, 1.7 Hz, 1H), 8.13 (dd, *J* = 8.3, 1.7 Hz, 1H), 7.59-7.51 (m, 2H), 7.40 (dd, *J* = 8.3, 4.2 Hz, 1H), 7.32-7.24 (m, 3H), 7.21 (q, *J* = 1.2 Hz, 1H), 7.13-7.09 (m, 1H), 7.06-7.01 (m, 2H), 2.52-2.42 (m, 3H).

**<sup>13</sup>C NMR** (101 MHz; CDCl<sub>3</sub>): δ 166.7, 148.1, 141.3, 138.6, 138.4, 136.5, 136.2, 134.7, 134.1, 131.9, 130.9, 130.6, 129.90, 129.88, 129.7, 128.2, 127.9, 127.4, 126.7, 122.0, 121.6, 116.8, 19.6

**HRMS** Calculated for [C<sub>23</sub>H<sub>18</sub>ClN<sub>2</sub>OS]<sup>+</sup>: 405.0823, Found: 405.0828.

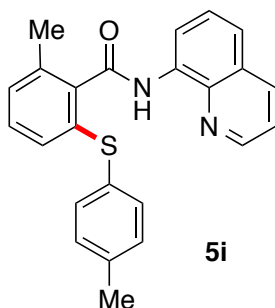

**5i:** 2-methyl-N-(quinolin-8-yl)-6-(p-tolylthio)benzamide was prepared following the general procedure **1.3** and purified by flash chromatography (Hexane-EtOAc, v/v 20/1) as colorless oil; Isolated yield 90%;

**<sup>1</sup>H-NMR** (400 MHz; CDCl<sub>3</sub>): δ 9.94 (s, 1H), 8.98 (dd, *J* = 7.4, 1.5 Hz, 1H), 8.70 (dd, *J* = 4.2, 1.6 Hz, 1H), 8.15 (dd, *J* = 8.3, 1.7 Hz, 1H), 7.61-7.53 (m, 2H), 7.42 (dd, *J* = 8.3, 4.2 Hz, 1H), 7.29-7.19 (m, 3H), 7.15-7.11 (m, 2H), 7.02-7.00 (m, 2H), 2.46 (s, 3H), 2.24 (s, 3H).

**<sup>13</sup>C NMR** (101 MHz; CDCl<sub>3</sub>): δ 167.0, 148.1, 139.2, 138.5, 137.5, 136.2, 135.9, 134.34, 134.32, 132.4, 131.4, 129.9, 129.5, 129.3, 129.0, 127.9, 127.4, 121.9, 121.5, 116.9, 21.0, 19.6

**HRMS** Calculated for [C<sub>24</sub>H<sub>21</sub>N<sub>2</sub>OS]<sup>+</sup>: 385.1369, Found: 385.1373.

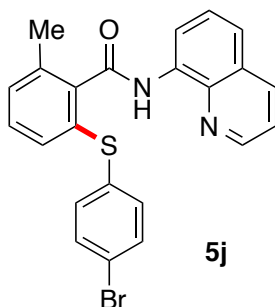

**5j:** 2-((4-bromophenyl)thio)-6-methyl-N-(quinolin-8-yl)benzamide was prepared following the general procedure **1.3** and purified by flash chromatography (Hexane-EtOAc, v/v 20/1) as colorless oil; Isolated yield 83%;

**<sup>1</sup>H-NMR** (400 MHz; CDCl<sub>3</sub>): δ 8.94 (dd, *J* = 7.3, 1.7 Hz, 1H), 8.65 (dd, *J* = 4.2, 1.7 Hz, 1H), 8.14 (dd, *J* = 8.3, 1.7 Hz, 1H), 7.58-7.54 (m, 2H), 7.42 (dd, *J* = 8.3, 4.2 Hz, 1H), 7.30-7.29 (m, 2H), 7.26-7.23 (m, 3H), 7.12-7.10 (m, 2H), 2.47 (s, 3H).

**<sup>13</sup>C NMR** (101 MHz; CDCl<sub>3</sub>): δ 166.7, 148.2, 141.0, 138.3, 136.5, 136.2, 135.6, 134.1, 132.04, 131.92, 131.53, 131.45, 130.4, 129.8, 127.9, 127.3, 122.0, 121.6, 120.8, 116.7, 19.6

**HRMS** Calculated for [C<sub>23</sub>H<sub>18</sub>BrN<sub>2</sub>OS]<sup>+</sup>: 449.0318, Found: 449.0322.

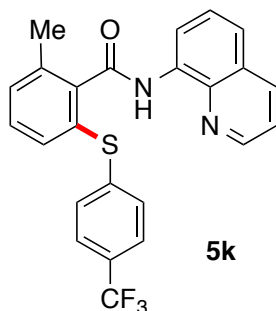

**5k: 2-methyl-N-(quinolin-8-yl)-6-((4-(trifluoromethyl)phenyl)thio)benzamide** was prepared following the general procedure **1.3** at 120 °C and purified by flash chromatography (Hexane-EtOAc, v/v 20/1) as colorless oil; Isolated yield 65%;

**<sup>1</sup>H-NMR** (400 MHz; CDCl<sub>3</sub>): δ 9.86 (s, 1H), 8.92 (dd, *J* = 7.2, 1.7 Hz, 1H), 8.62 (dd, *J* = 4.2, 1.6 Hz, 1H), 8.15 (dd, *J* = 8.3, 1.6 Hz, 1H), 7.58-7.55 (m, 2H), 7.49 (s, 1H), 7.41 (dd, *J* = 8.3, 4.1 Hz, 2H), 7.28-7.26 (m, 5H), 2.49 (s, 3H).

**<sup>13</sup>C NMR** (101 MHz; CDCl<sub>3</sub>): δ 166.6, 148.1, 141.4, 138.35, 138.24, 136.7, 136.3, 134.1, 133.16, 133.15, 131.9, 131.3 (q, *J* = 31.7 Hz), 130.8, 130.6, 130.0, 129.4, 127.9, 127.4, 126.4 (q, *J* = 3.9 Hz), 123.3 (q, *J* = 3.9 Hz), 122.9-121.8 (q, *J* = 113 Hz), 122.1, 121.6, 116.8, 19.6

**HRMS** Calculated for [C<sub>24</sub>H<sub>18</sub>F<sub>3</sub>N<sub>2</sub>OS]<sup>+</sup>: 439.1086, Found: 439.1093.

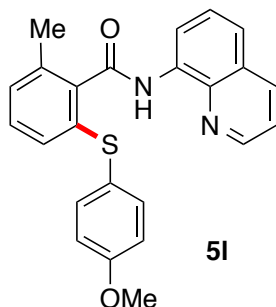

**5l: 2-((4-methoxyphenyl)thio)-6-methyl-N-(quinolin-8-yl)benzamide** was prepared following the general procedure **1.3** and purified by flash chromatography (Hexane-EtOAc, v/v 20/1) as colorless oil; Isolated yield 85%;

**<sup>1</sup>H-NMR** (400 MHz; CDCl<sub>3</sub>): δ 9.97 (s, 1H), 9.01 (dd, *J* = 7.5, 1.5 Hz, 1H), 8.72 (dd, *J* = 4.2, 1.7 Hz, 1H), 8.16 (dd, *J* = 8.3, 1.7 Hz, 1H), 7.62-7.54 (m, 2H), 7.44-7.37 (m, 3H), 7.18 (t, *J* = 7.7 Hz, 1H), 7.10 (d, *J* = 7.6 Hz, 1H), 7.01 (t, *J* = 8.5 Hz, 1H), 6.78-6.76 (m, 2H), 3.72 (s, 3H), 2.45 (s, 3H).

**<sup>13</sup>C NMR** (101 MHz; CDCl<sub>3</sub>): δ 167.0, 159.7, 148.2, 138.5, 138.2, 136.2, 135.8, 135.2, 134.3, 129.4, 128.4, 128.0, 127.4, 126.6, 124.6, 121.9, 121.6, 116.9, 114.8, 114.3, 55.2, 19.5

**HRMS** Calculated for [C<sub>24</sub>H<sub>21</sub>N<sub>2</sub>O<sub>2</sub>S]<sup>+</sup>: 401.1318, Found: 401.1323.

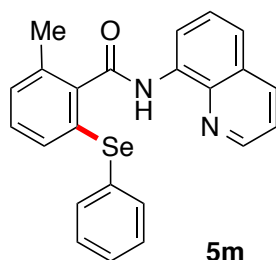

**5m: 2-methyl-6-(phenylselanyl)-N-(quinolin-8-yl)benzamide** was prepared following the general procedure **1.3** with 1.5 equiv. diphenylselenium and purified by flash chromatography (Hexane-EtOAc, v/v 20/1) as colorless oil; Isolated yield 81%;

**<sup>1</sup>H-NMR** (400 MHz; CDCl<sub>3</sub>): δ 9.93 (s, 1H), 8.98 (dd, *J* = 7.4, 1.5 Hz, 1H), 8.69 (dd, *J* = 4.2, 1.7 Hz, 1H), 8.17 (dd, *J* = 8.3, 1.6 Hz, 1H), 7.63-7.54 (m, 2H), 7.50-7.48 (m, 2H), 7.43 (dd, *J* = 8.3, 4.2 Hz, 1H), 7.29 (t, *J* = 4.5 Hz, 1H), 7.20-7.17 (m, 5H), 2.49 (s, 3H).

**<sup>13</sup>C NMR** (101 MHz; CDCl<sub>3</sub>): δ 167.5, 148.2, 140.6, 138.5, 136.3, 135.9, 134.3, 133.9, 131.6, 130.9, 129.8, 129.58, 129.46, 129.2, 128.0, 127.56, 127.43, 122.0, 121.6, 116.9, 19.9

**HRMS** Calculated for [C<sub>23</sub>H<sub>19</sub>N<sub>2</sub>OSe]<sup>+</sup>: 419.0657, Found: 419.0655.

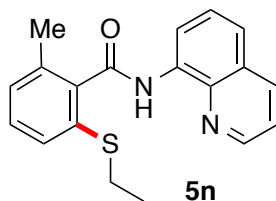

**5n: 2-(ethylthio)-6-methyl-N-(quinolin-8-yl)benzamide** was prepared following the general procedure **1.3** with 1.5 equiv. disulfide and purified by flash chromatography (Hexane-EtOAc, v/v 20/1) as colorless oil; Isolated yield 70%;

**<sup>1</sup>H-NMR** (400 MHz; CDCl<sub>3</sub>): δ 9.95 (s, 1H), 9.01 (dd, *J* = 7.5, 1.5 Hz, 1H), 8.74 (dd, *J* = 4.2, 1.7 Hz, 1H), 8.18 (dd, *J* = 8.3, 1.7 Hz, 1H), 7.63-7.55 (m, 2H), 7.44 (dd, *J* = 8.3, 4.2 Hz, 1H), 7.35-7.31 (m, 2H), 7.15 (dt, *J* = 7.3, 0.7 Hz, 1H), 2.94 (q, *J* = 7.4 Hz, 2H), 2.44 (s, 3H), 1.26 (t, *J* = 7.4 Hz, 4H).

**<sup>13</sup>C NMR** (101 MHz; CDCl<sub>3</sub>): δ 167.4, 148.2, 140.0, 138.6, 136.3, 135.8, 134.5, 133.3, 129.3, 128.6, 128.3, 128.0, 127.5, 121.9, 121.6, 116.9, 29.1, 19.5, 14.3

**HRMS** Calculated for [C<sub>19</sub>H<sub>19</sub>N<sub>2</sub>OS]<sup>+</sup>: 323.1213, Found: 323.1216.

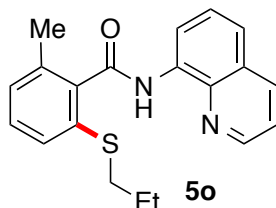

**5o: 2-methyl-6-(propylthio)-N-(quinolin-8-yl)benzamide** was prepared following the general procedure **1.3** with 1.5 equiv. disulfide and purified by flash chromatography (Hexane-EtOAc, v/v 20/1) as colorless oil; Isolated yield 72%;

**<sup>1</sup>H-NMR** (400 MHz; CDCl<sub>3</sub>): δ 9.94-9.94 (m, 1H), 9.01 (dd, *J* = 7.5, 1.5 Hz, 1H), 8.74 (dd, *J* = 4.2, 1.7 Hz, 1H), 8.18 (dd, *J* = 8.3, 1.7 Hz, 1H), 7.64-7.55 (m, 2H), 7.44 (dd, *J* =



8.3, 4.2 Hz, 1H), 7.35-7.29 (m, 2H), 7.14 (ddd,  $J = 7.4, 1.3, 0.7$  Hz, 1H), 2.88 (t,  $J = 7.3$  Hz, 2H), 2.43 (s, 3H), 1.66-1.57 (m, 2H), 0.93 (t,  $J = 7.3$  Hz, 3H).

$^{13}\text{C}$  NMR (101 MHz;  $\text{CDCl}_3$ ):  $\delta$  162.0, 148.2, 140.0, 139.5, 136.3, 135.8, 134.5, 133.6, 129.3, 128.51, 128.41, 128.0, 127.5, 121.9, 121.6, 116.9, 37.2, 22.6, 19.5, 13.4

HRMS Calculated for  $[\text{C}_{20}\text{H}_{21}\text{N}_2\text{OS}]^+$ : 337.1369, Found: 323.1371.

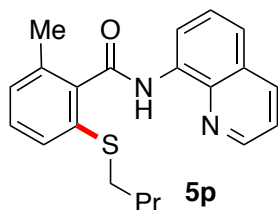

**5p**: 2-(butylthio)-6-methyl-N-(quinolin-8-yl)benzamide was prepared following the general procedure **1.3** with 1.5 equiv. disulfide and purified by flash chromatography (Hexane-EtOAc, v/v 20/1) as colorless oil; Isolated yield 73%;

$^1\text{H}$ -NMR (400 MHz;  $\text{CDCl}_3$ ):  $\delta$  9.95 (s, 1H), 9.01 (dd,  $J = 7.5, 1.4$  Hz, 1H), 8.73 (dd,  $J = 4.2, 1.7$  Hz, 1H), 8.17 (dd,  $J = 8.3, 1.6$  Hz, 1H), 7.63-7.54 (m, 2H), 7.43 (dd,  $J = 8.3, 4.2$  Hz, 1H), 7.30 (dt,  $J = 14.8, 7.4$  Hz, 2H), 7.14 (dd,  $J = 7.4, 0.5$  Hz, 1H), 2.91 (t,  $J = 7.5$  Hz, 2H), 2.43 (s, 3H), 1.61-1.53 (m, 2H), 1.37 (dt,  $J = 15.0, 7.4$  Hz, 2H), 0.83 (t,  $J = 7.4$  Hz, 3H).

$^{13}\text{C}$  NMR (101 MHz;  $\text{CDCl}_3$ ):  $\delta$  167.4, 148.2, 139.9, 138.5, 136.3, 135.7, 134.5, 133.8, 129.3, 128.4, 128.2, 128.0, 127.5, 121.9, 121.6, 116.8, 34.8, 31.2, 21.9, 19.5, 13.6

HRMS Calculated for  $[\text{C}_{20}\text{H}_{21}\text{N}_2\text{OS}]^+$ : 351.1526, Found: 351.1530.

## VII. NMR spectra data

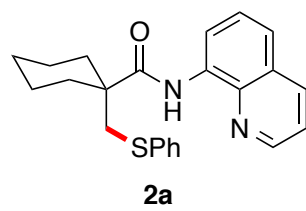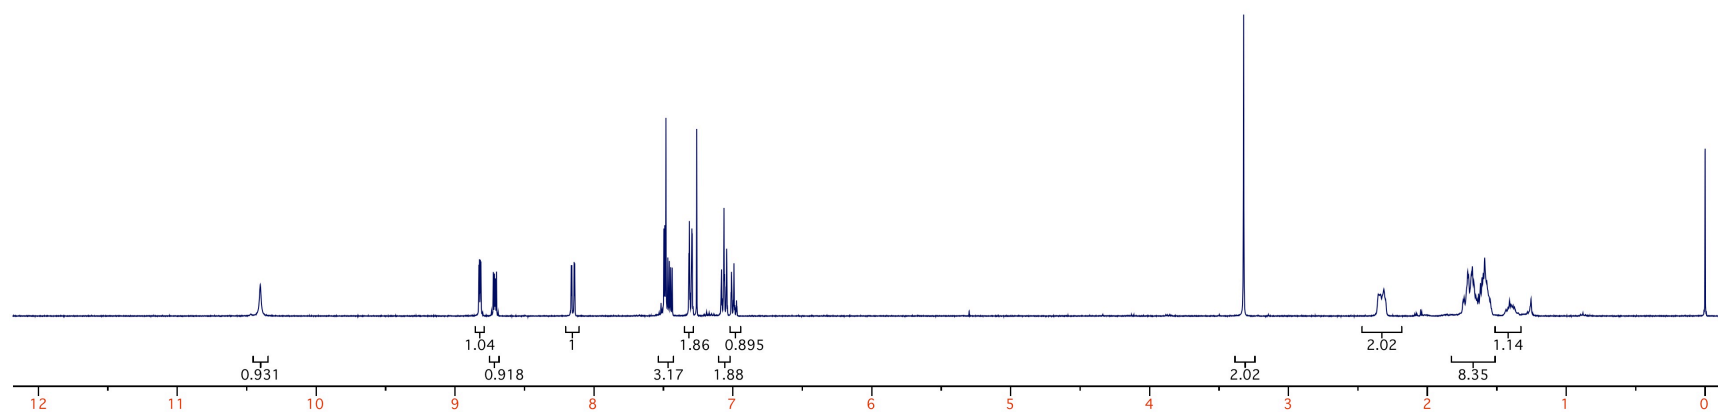

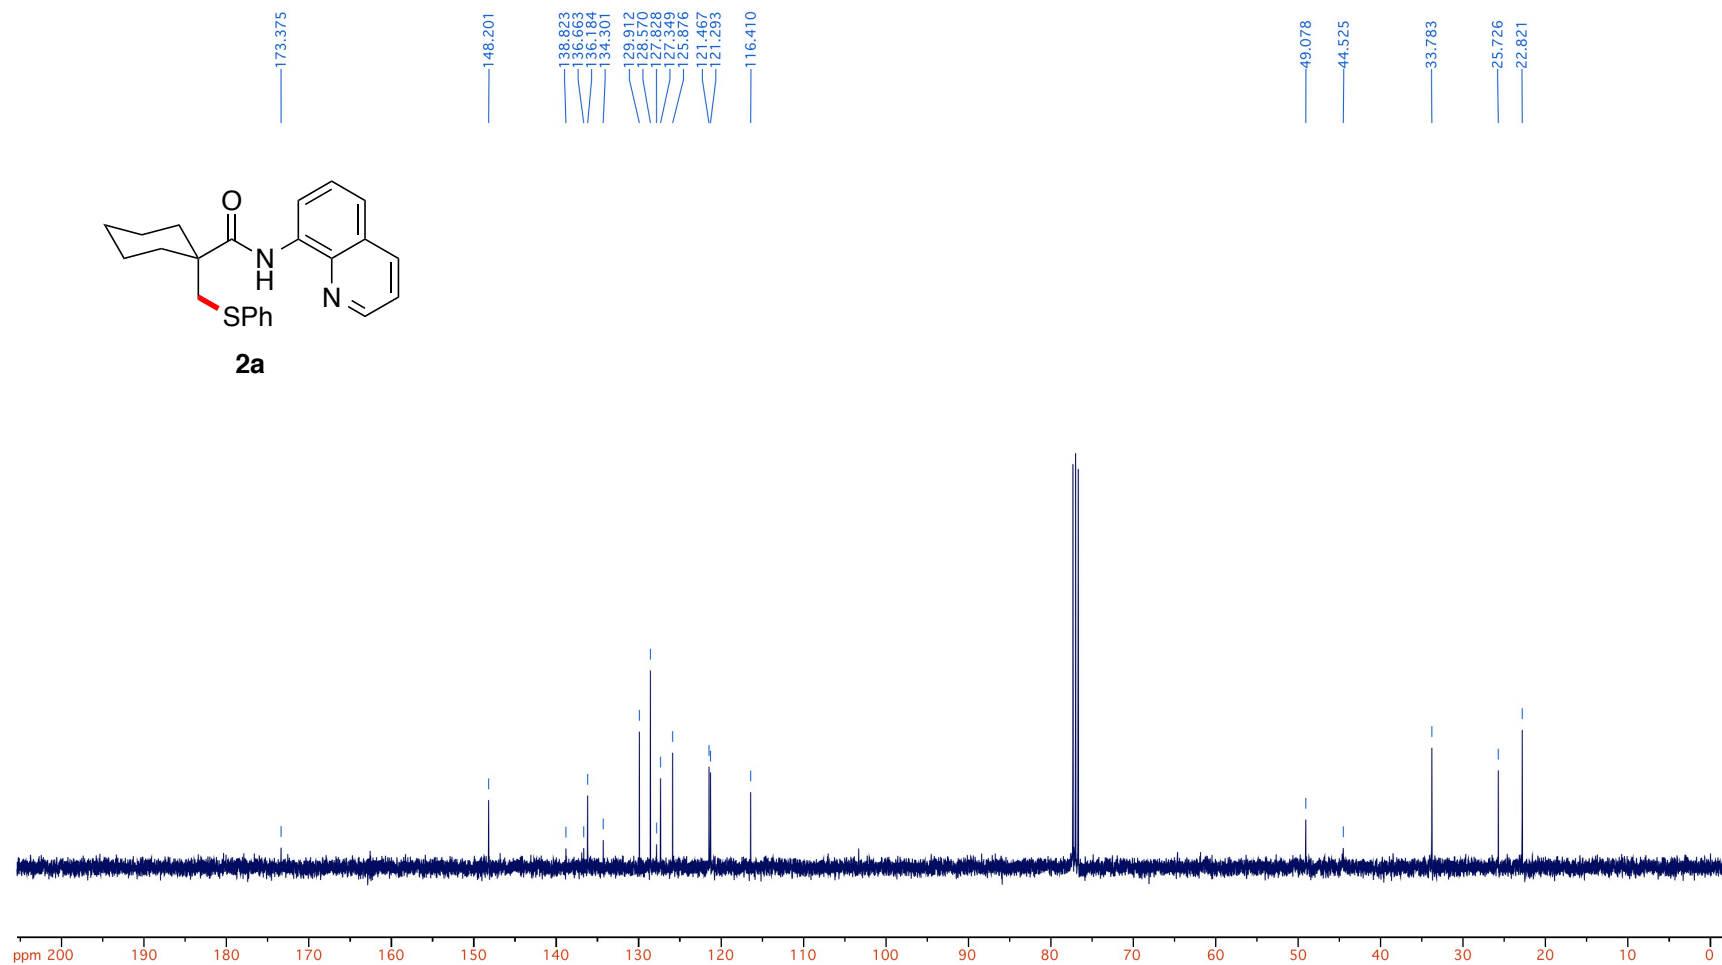

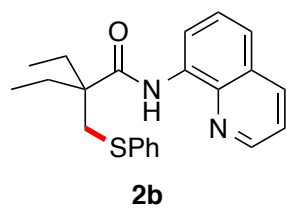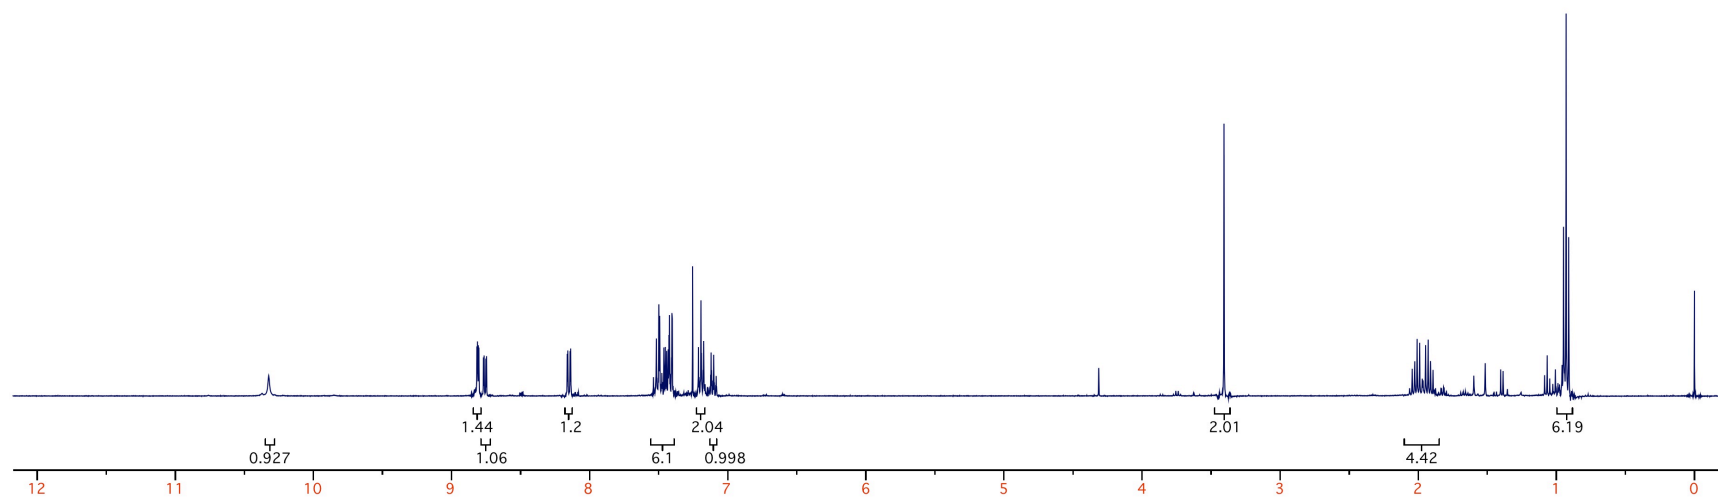

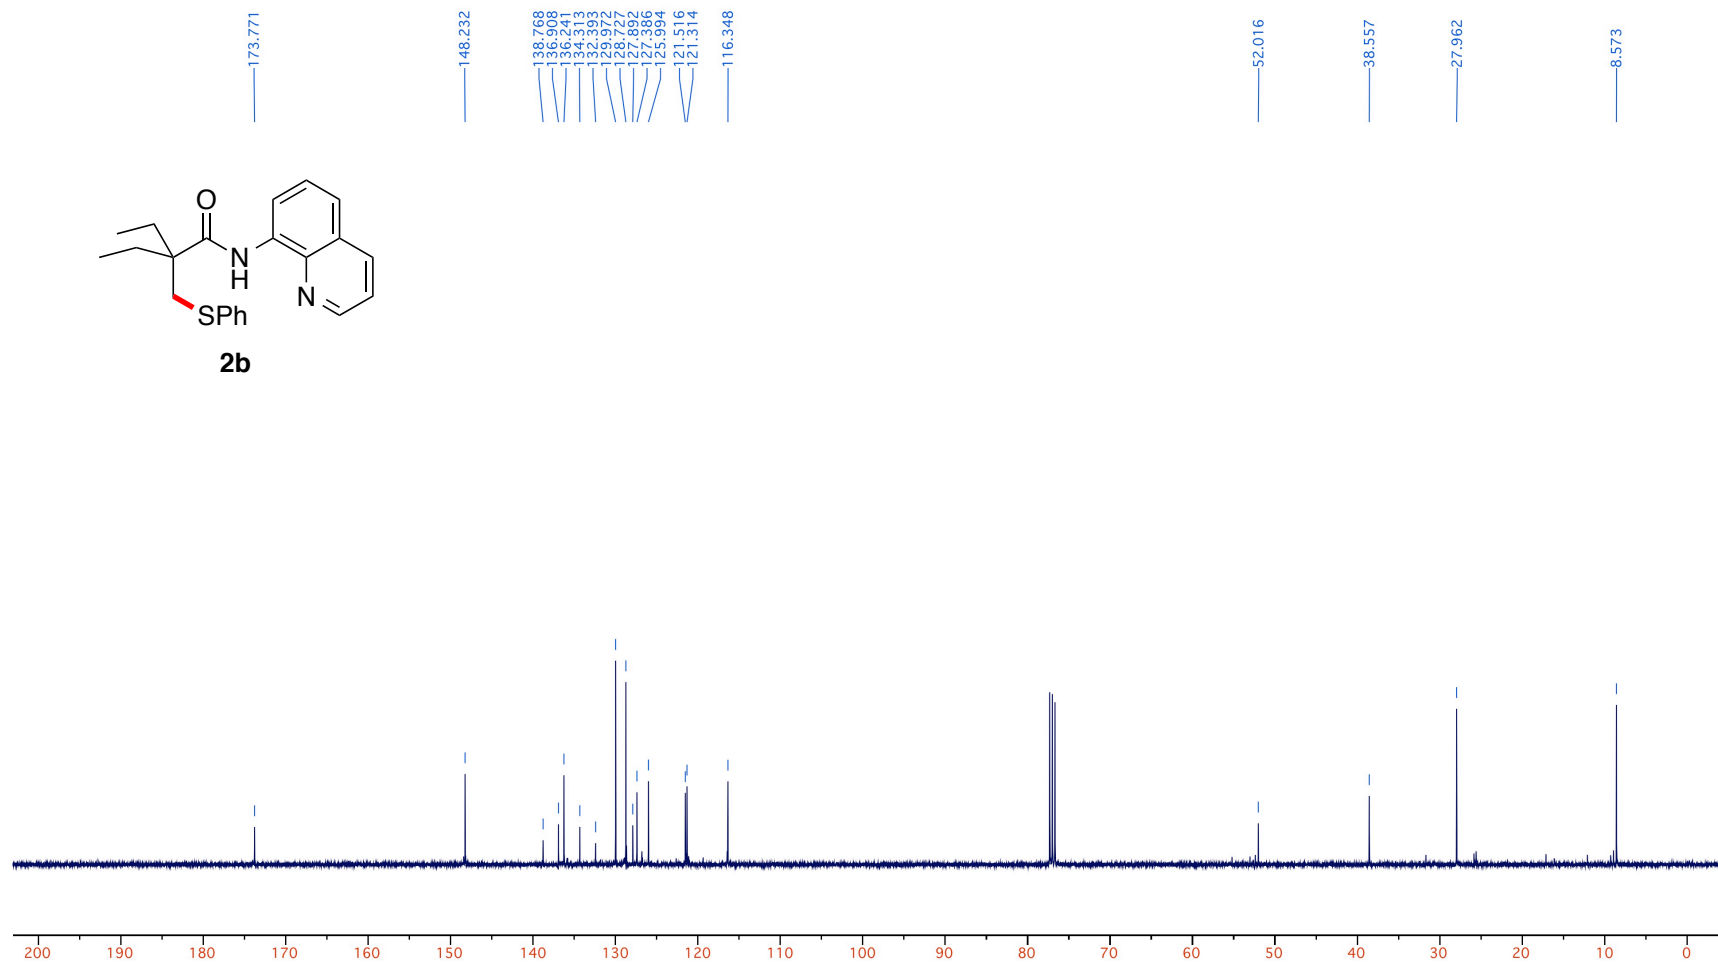

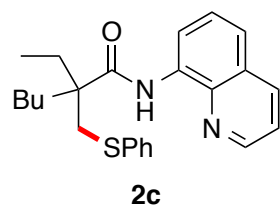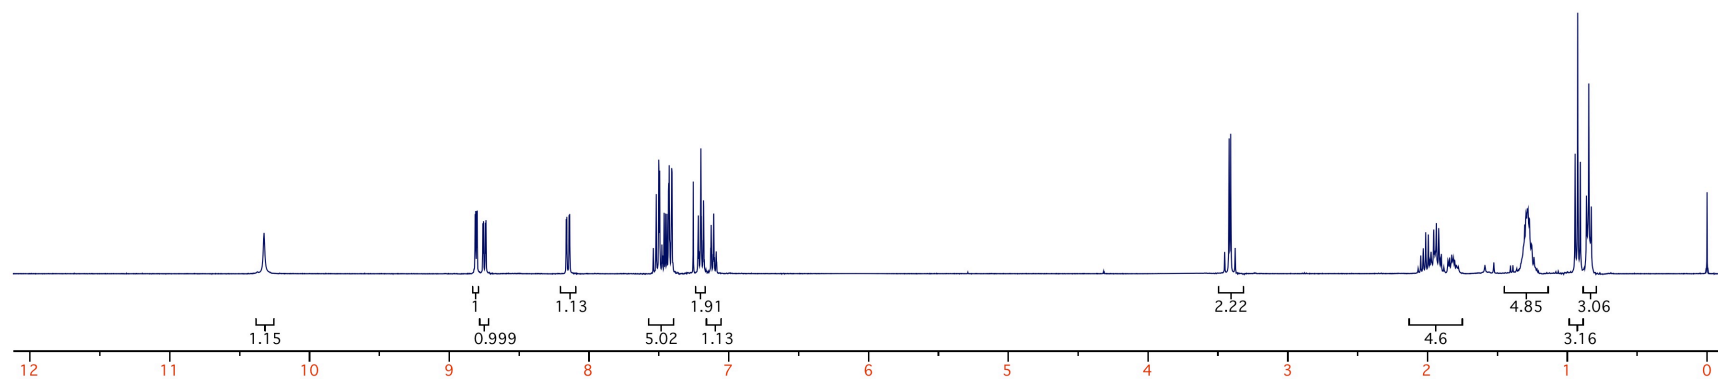

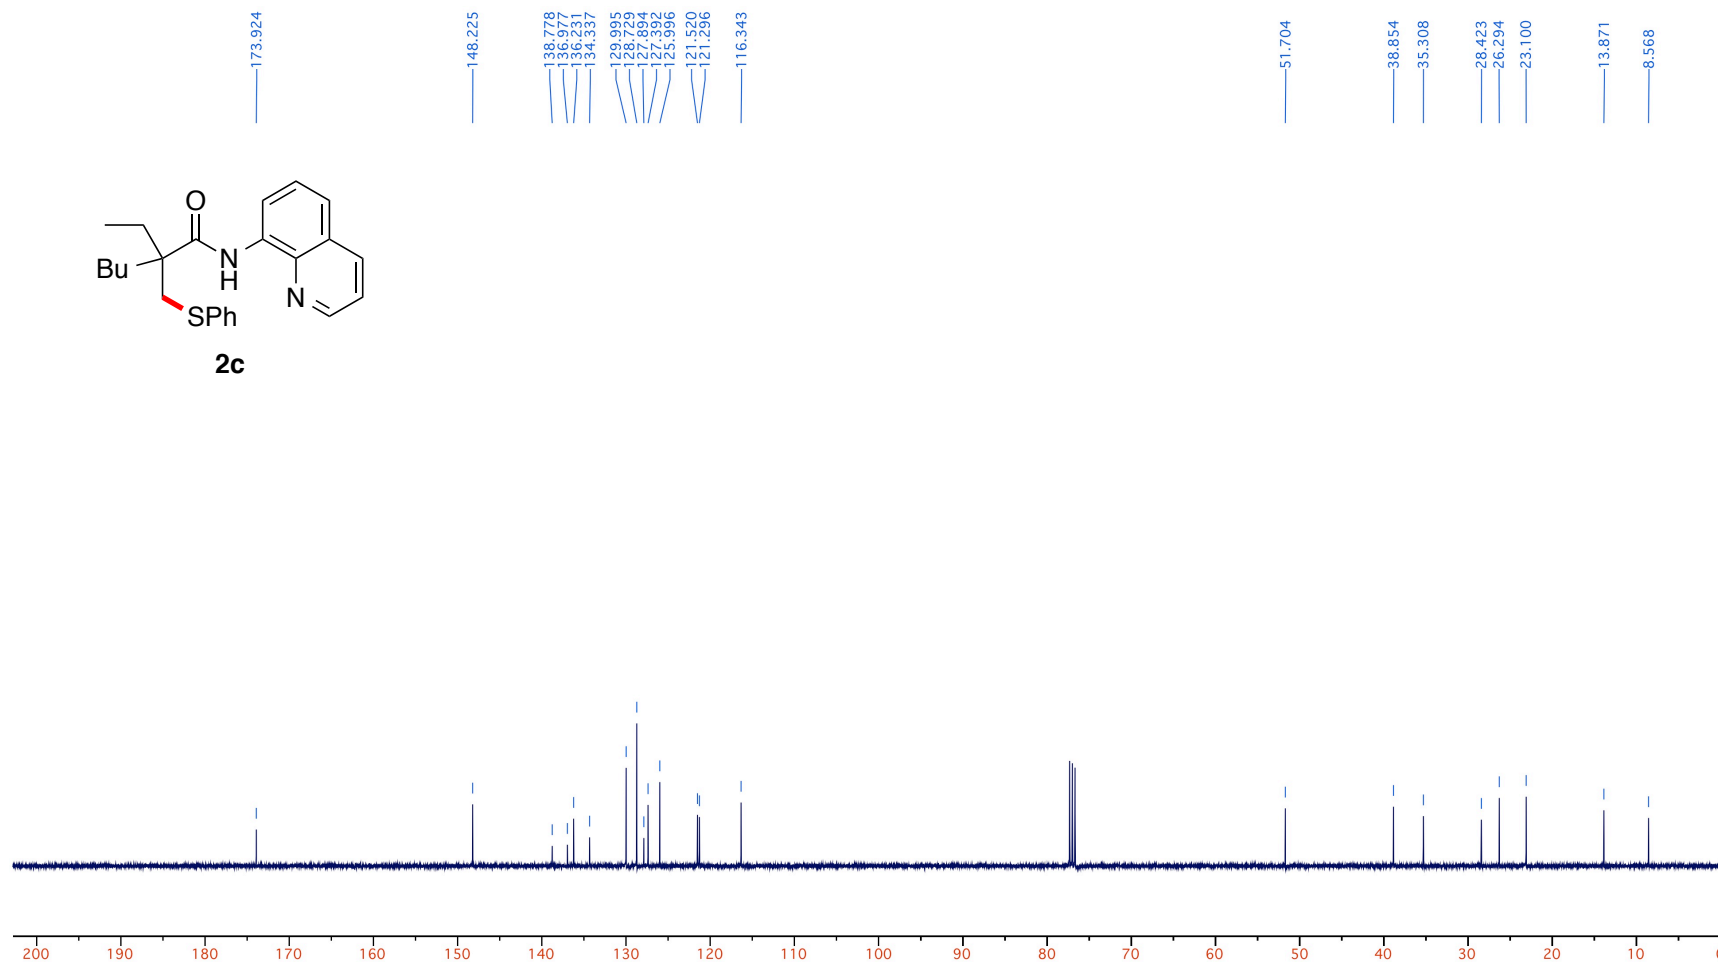



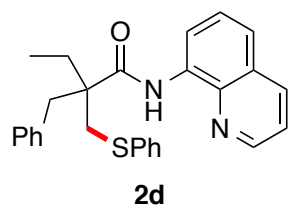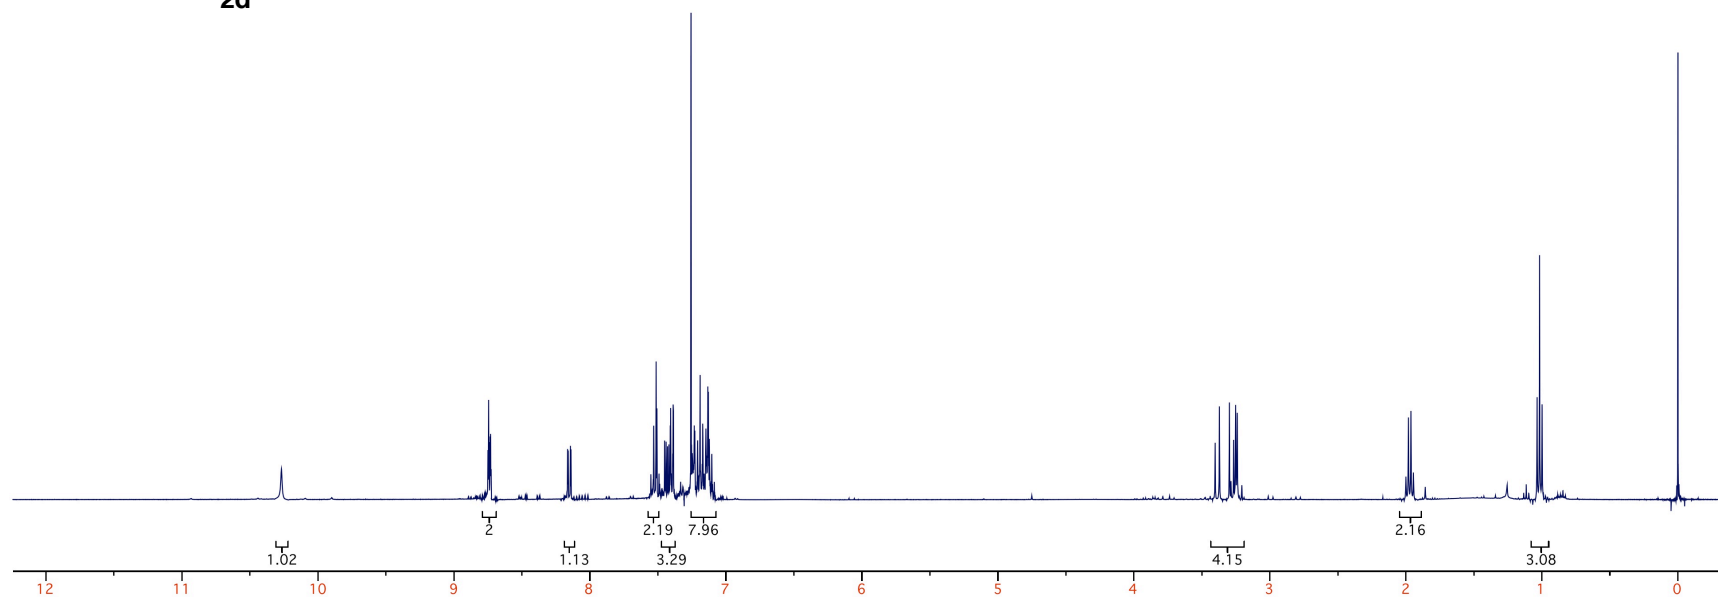

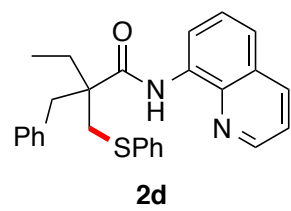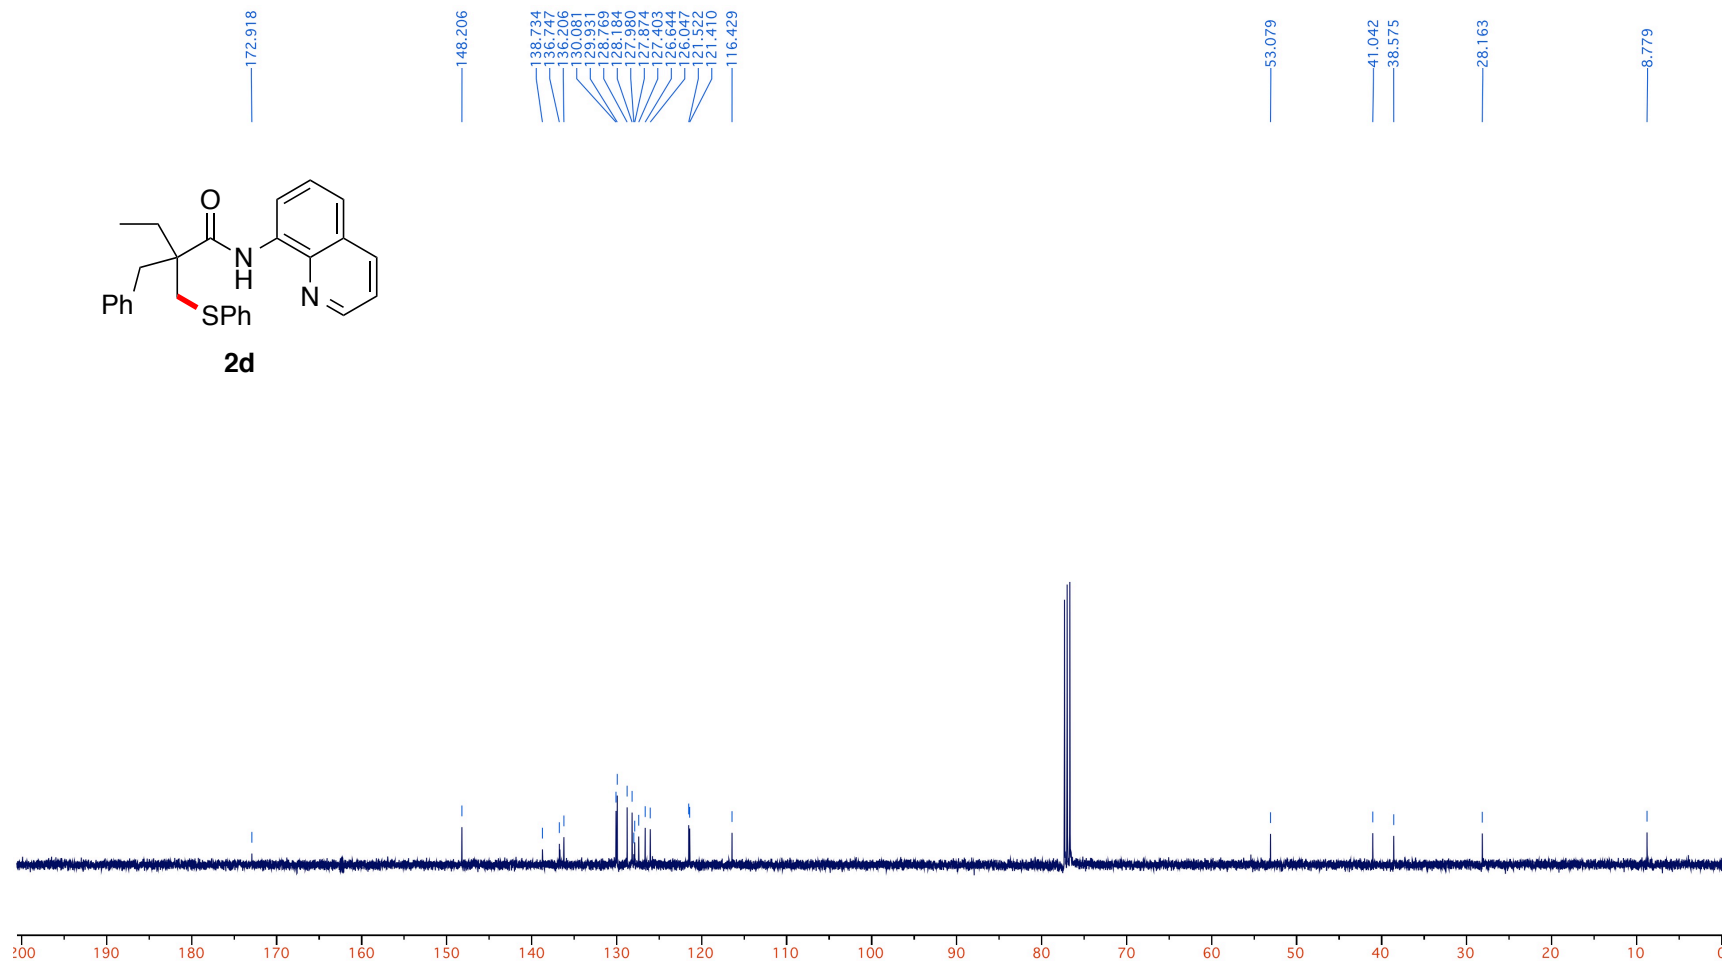

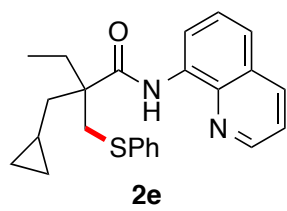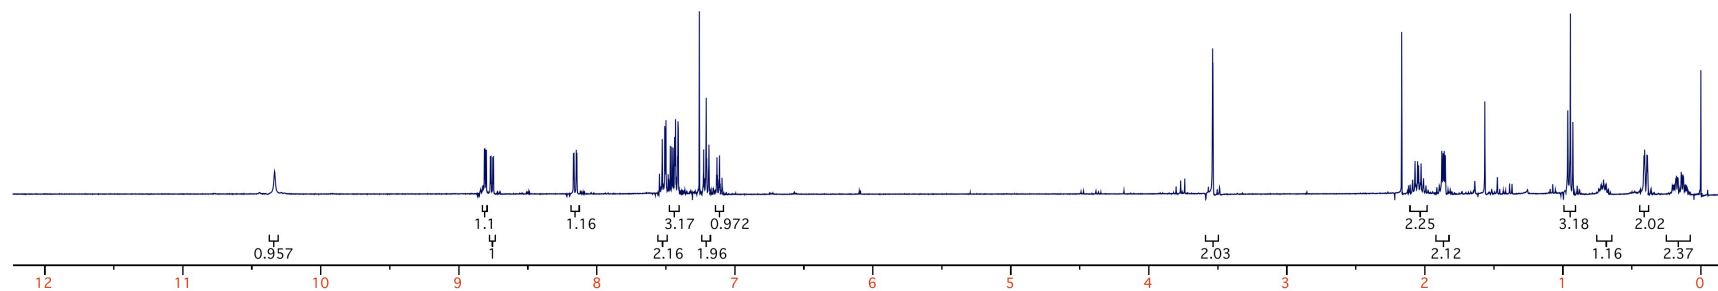

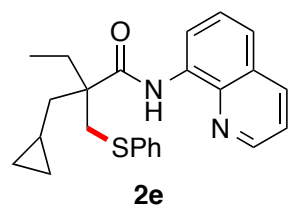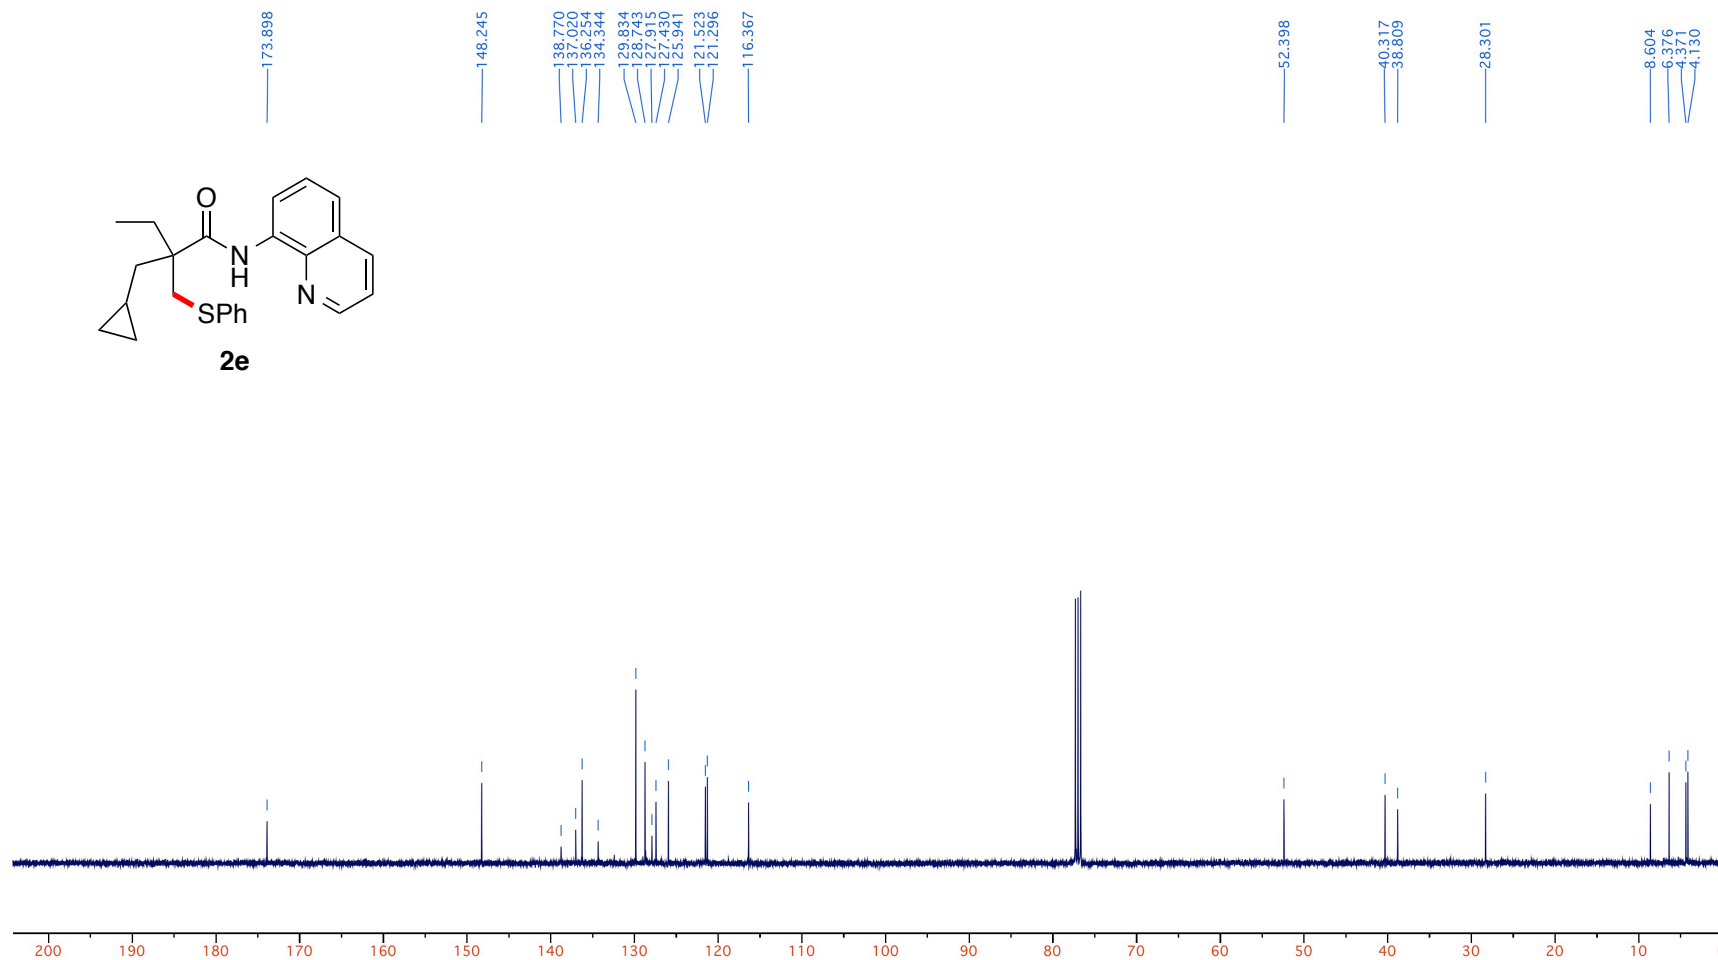

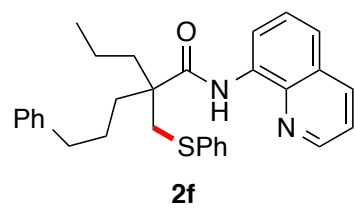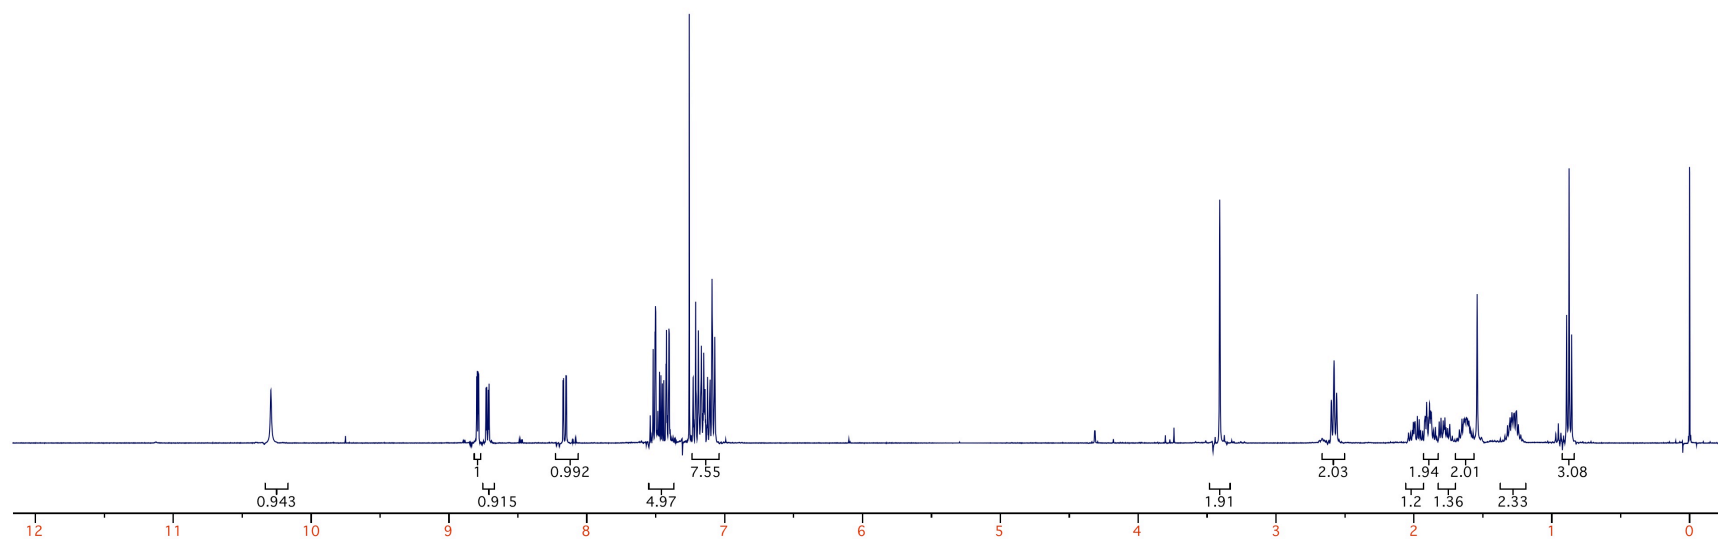

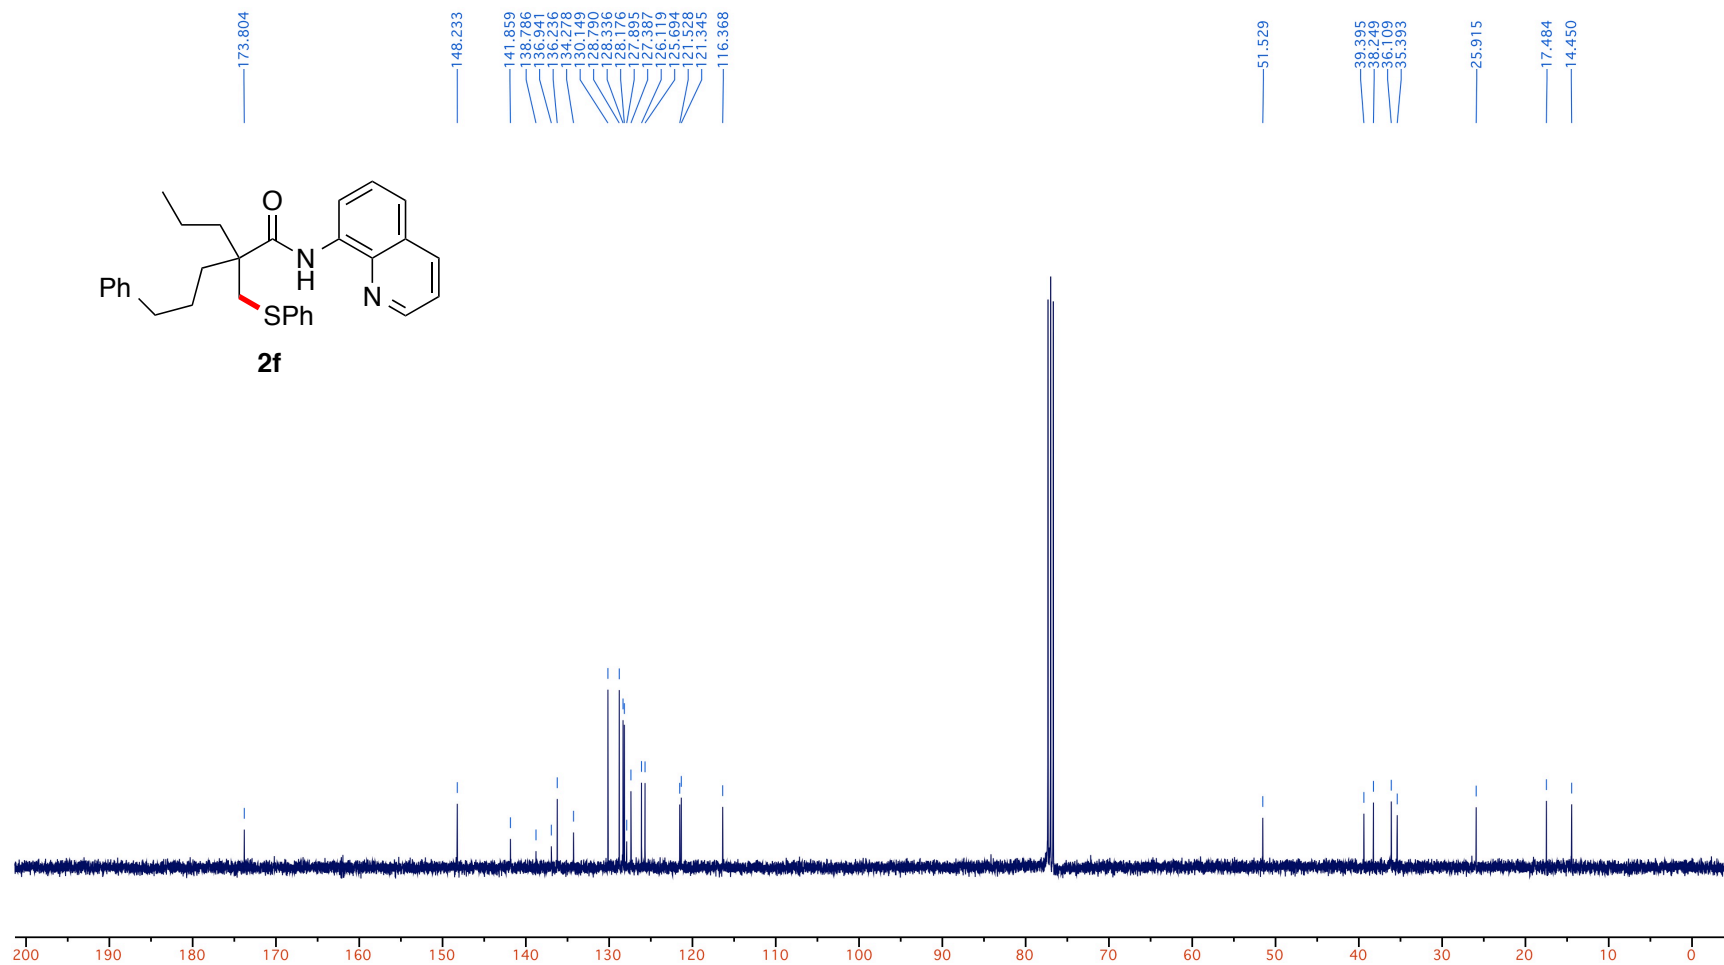

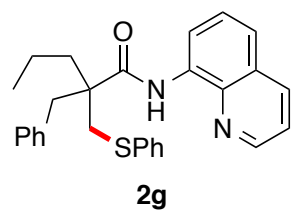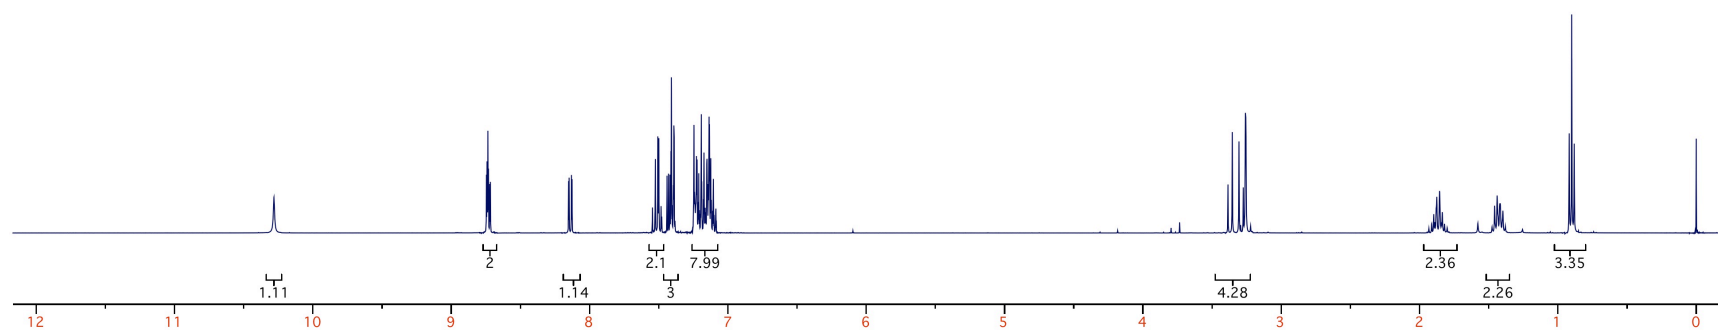

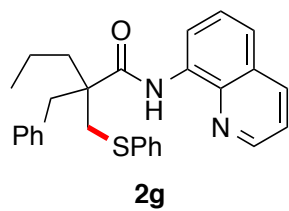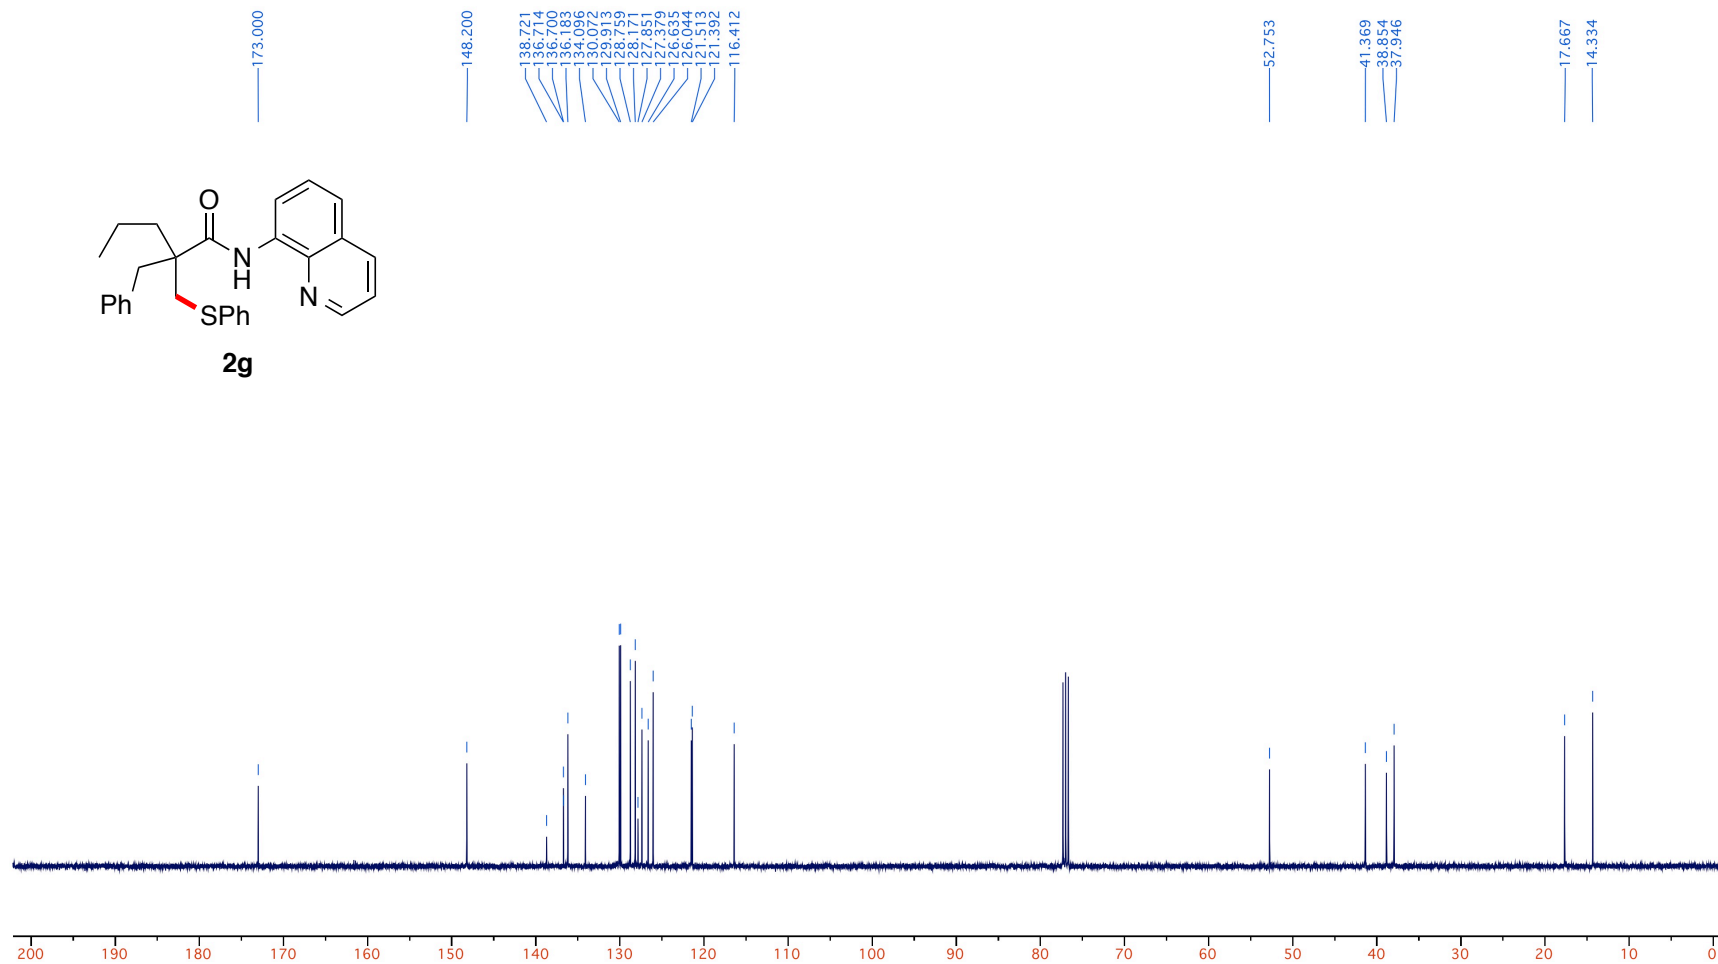



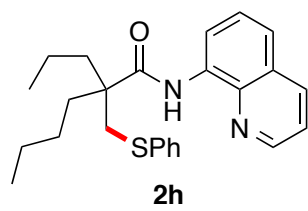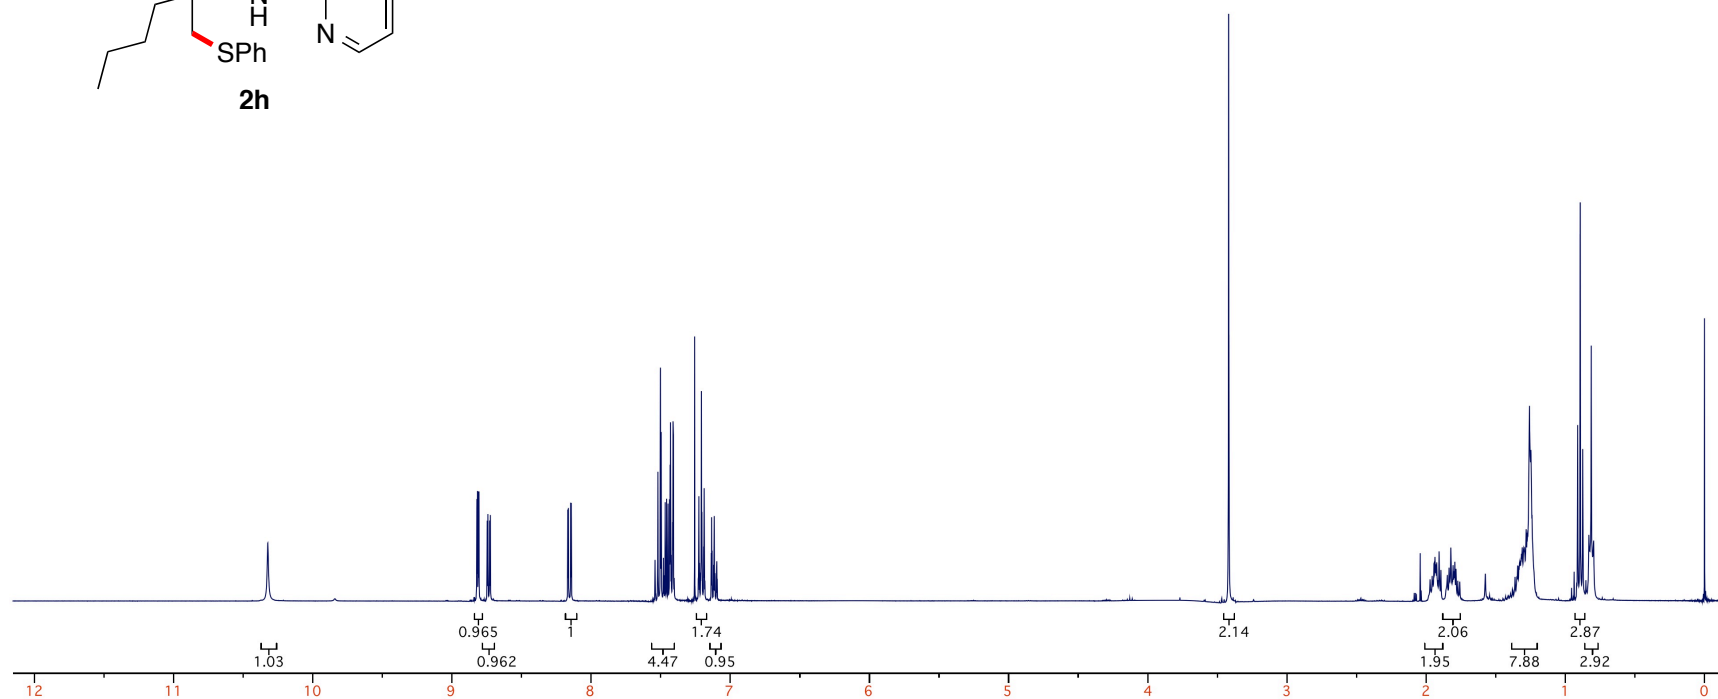

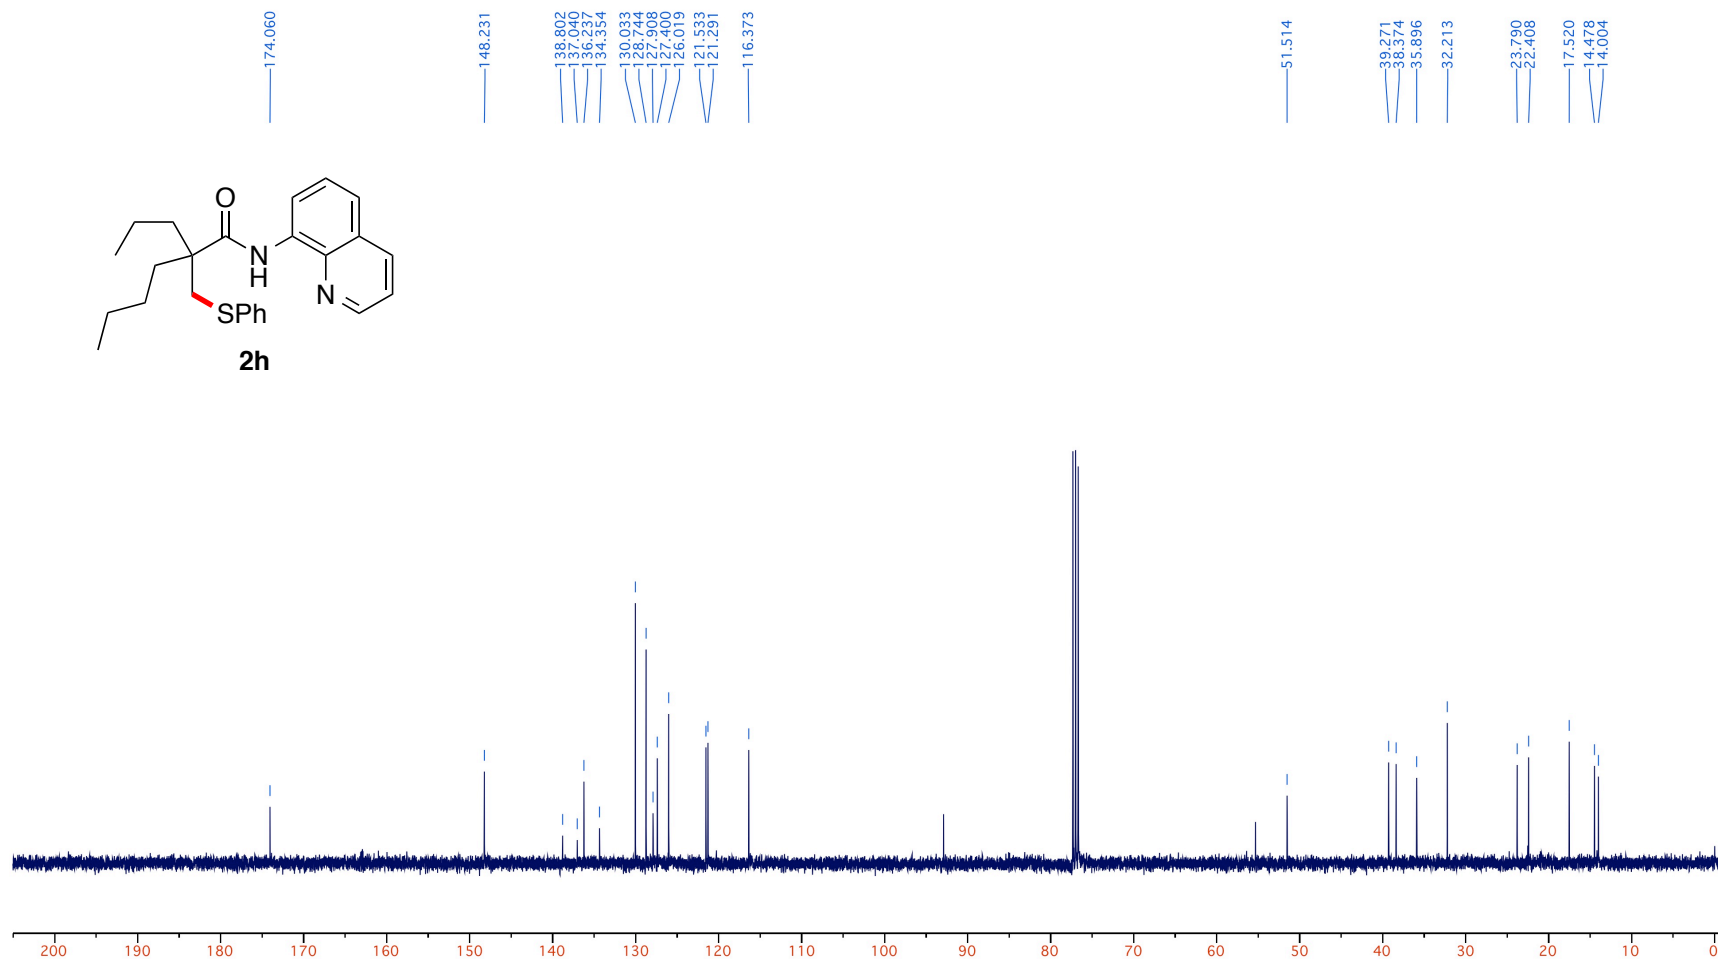

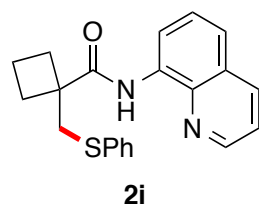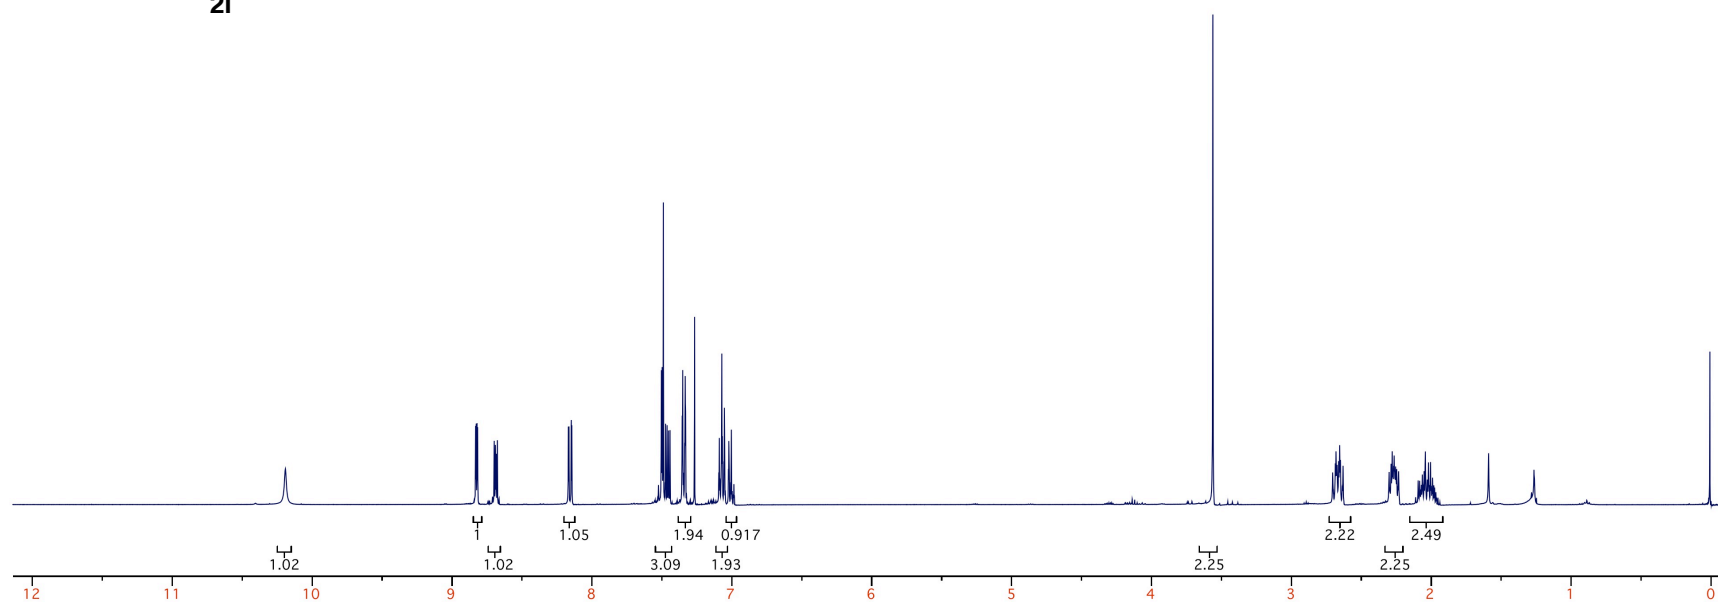

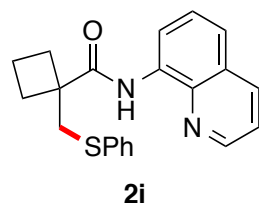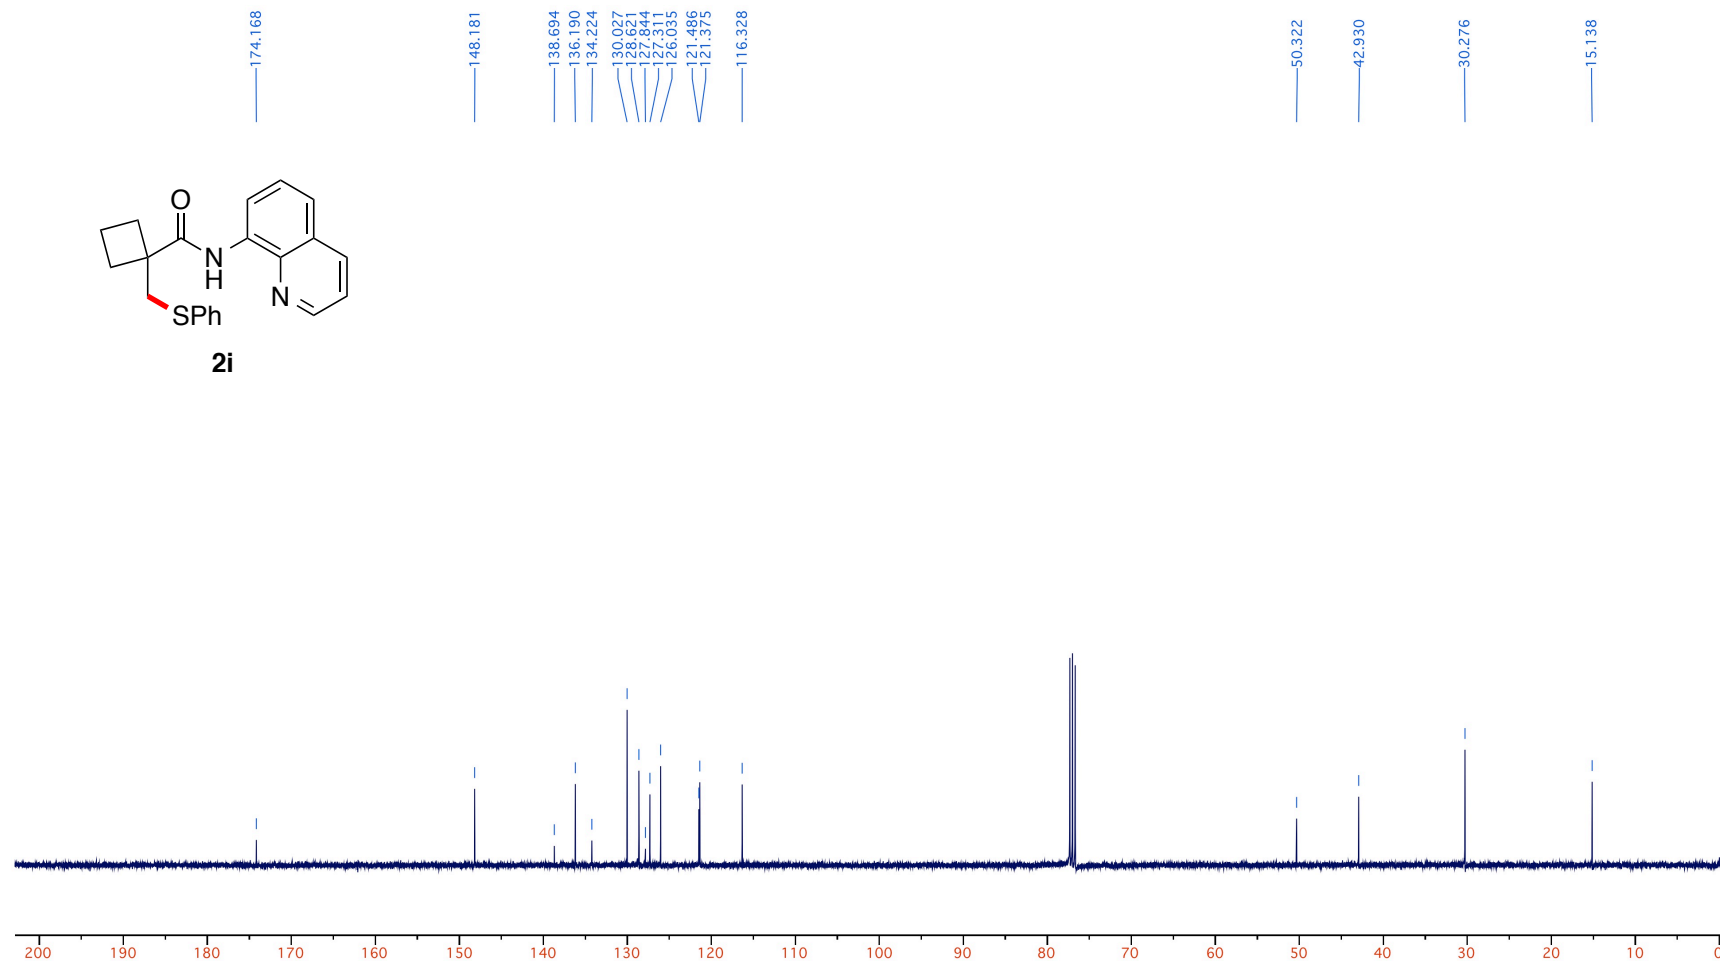

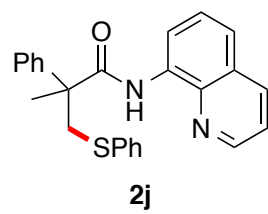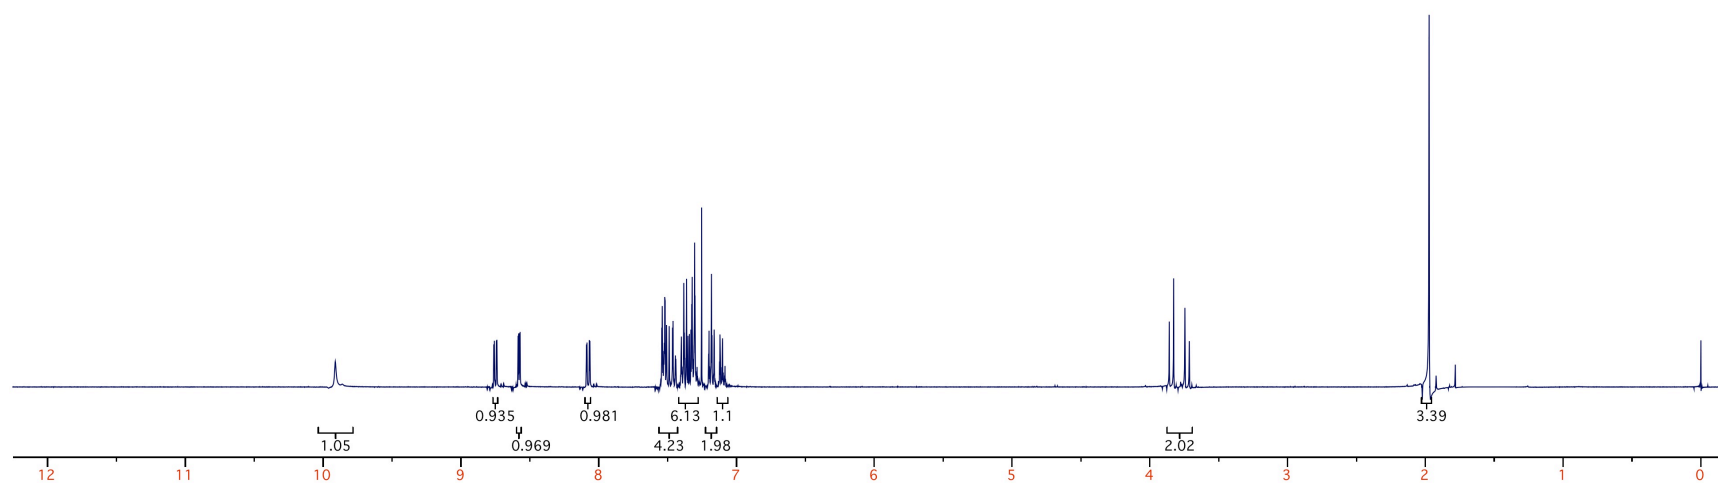

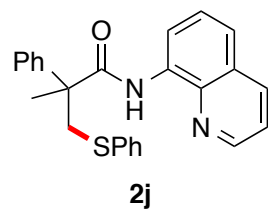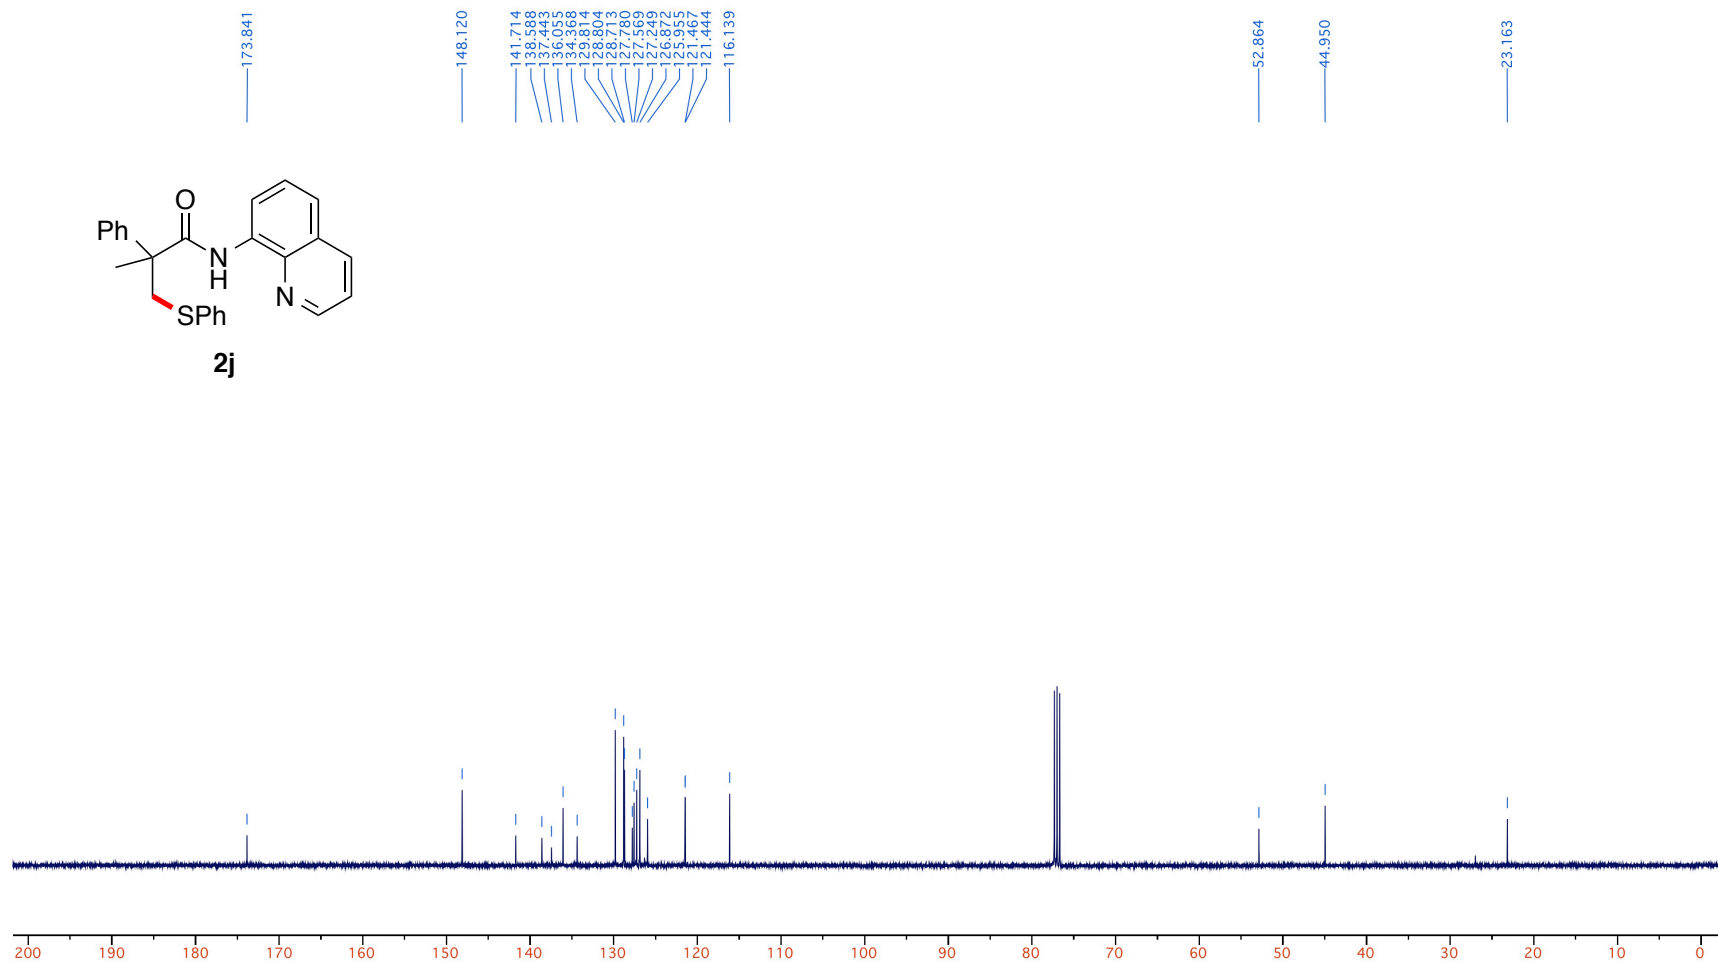

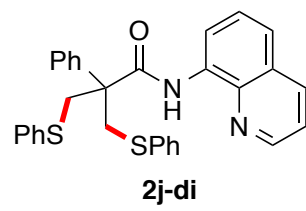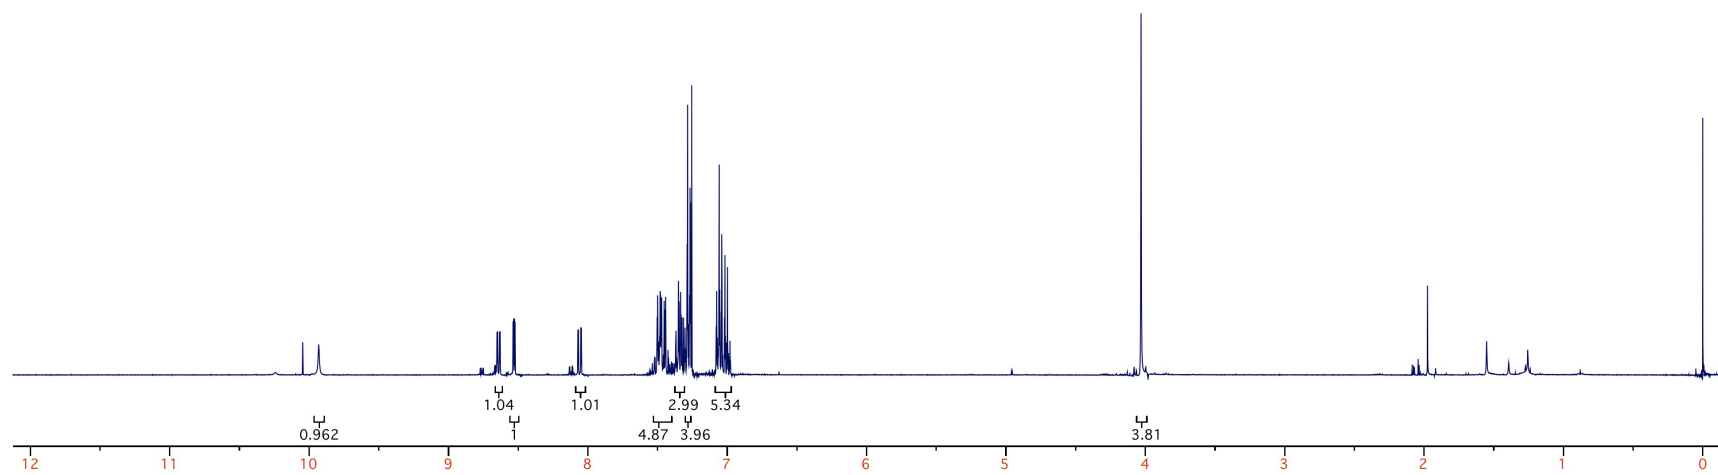

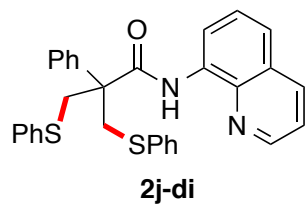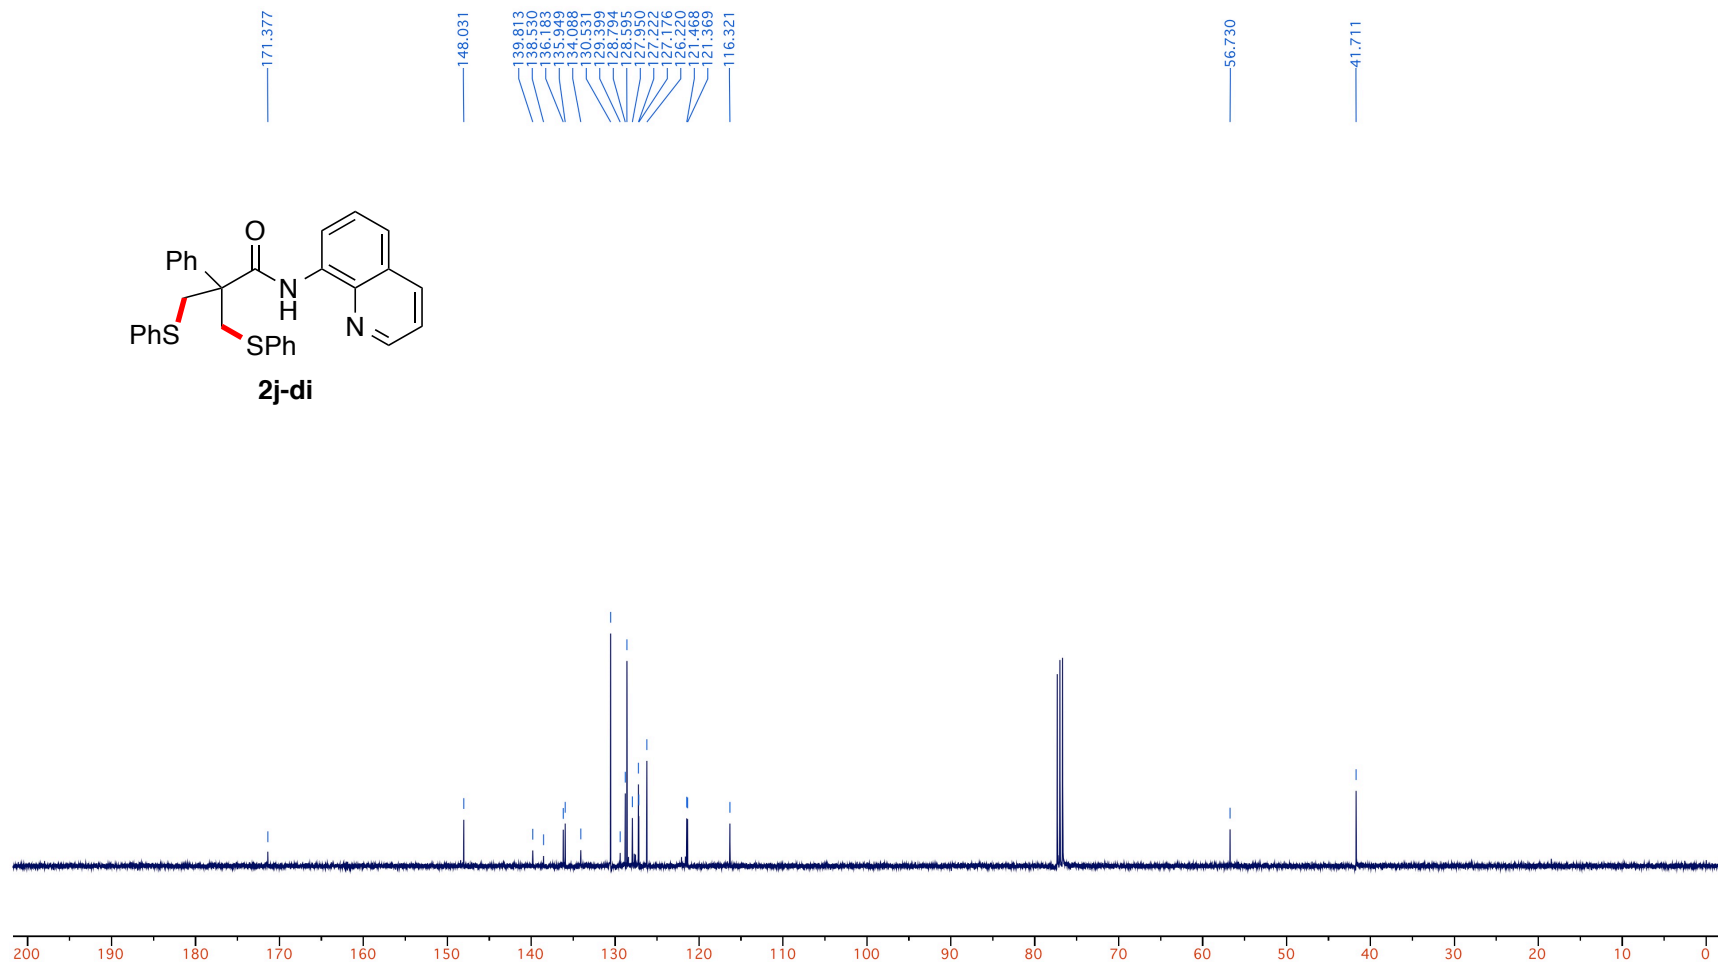



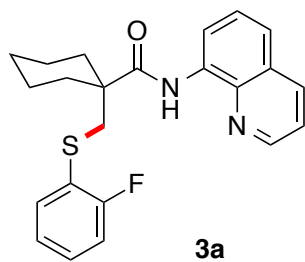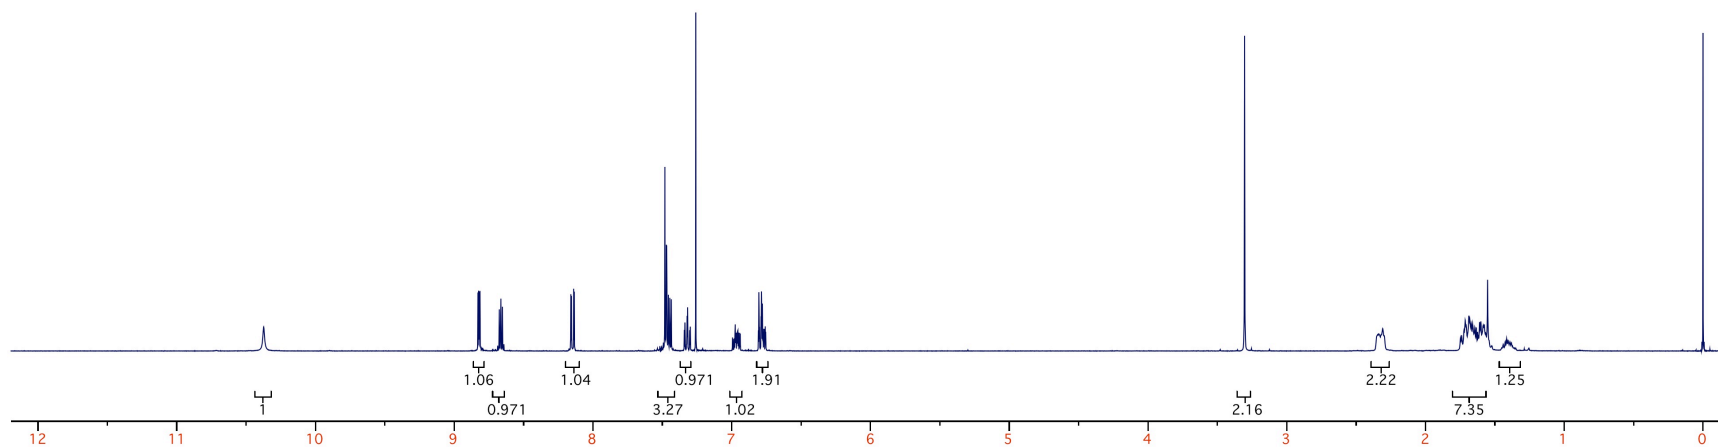

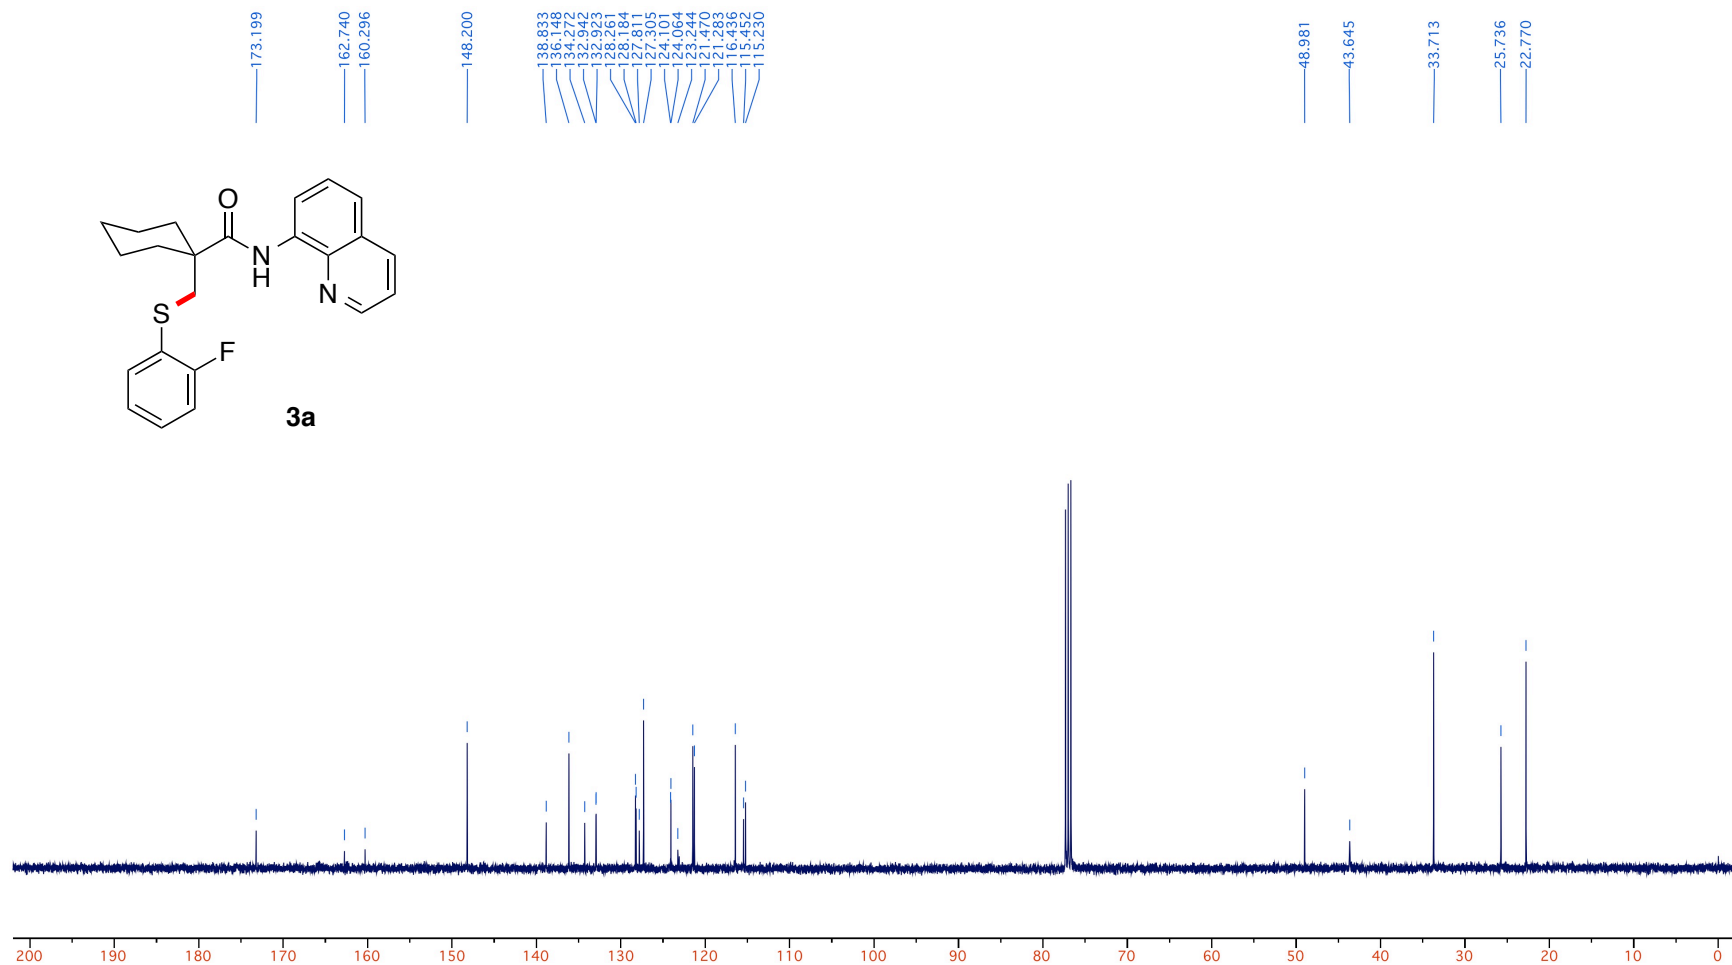

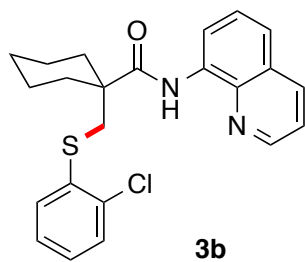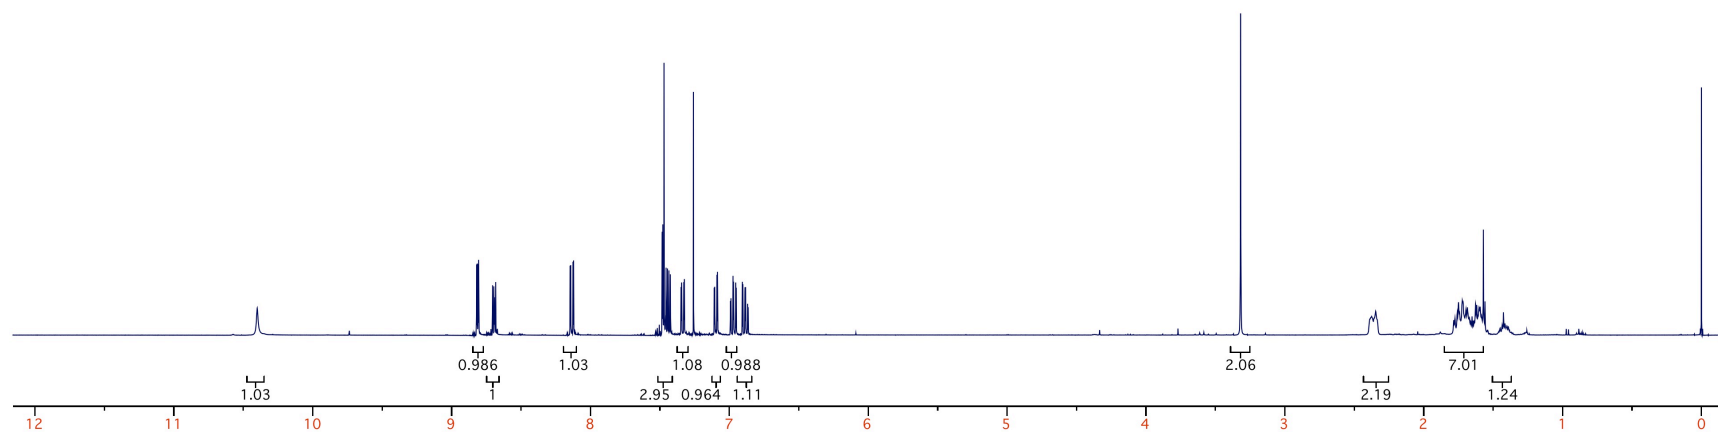

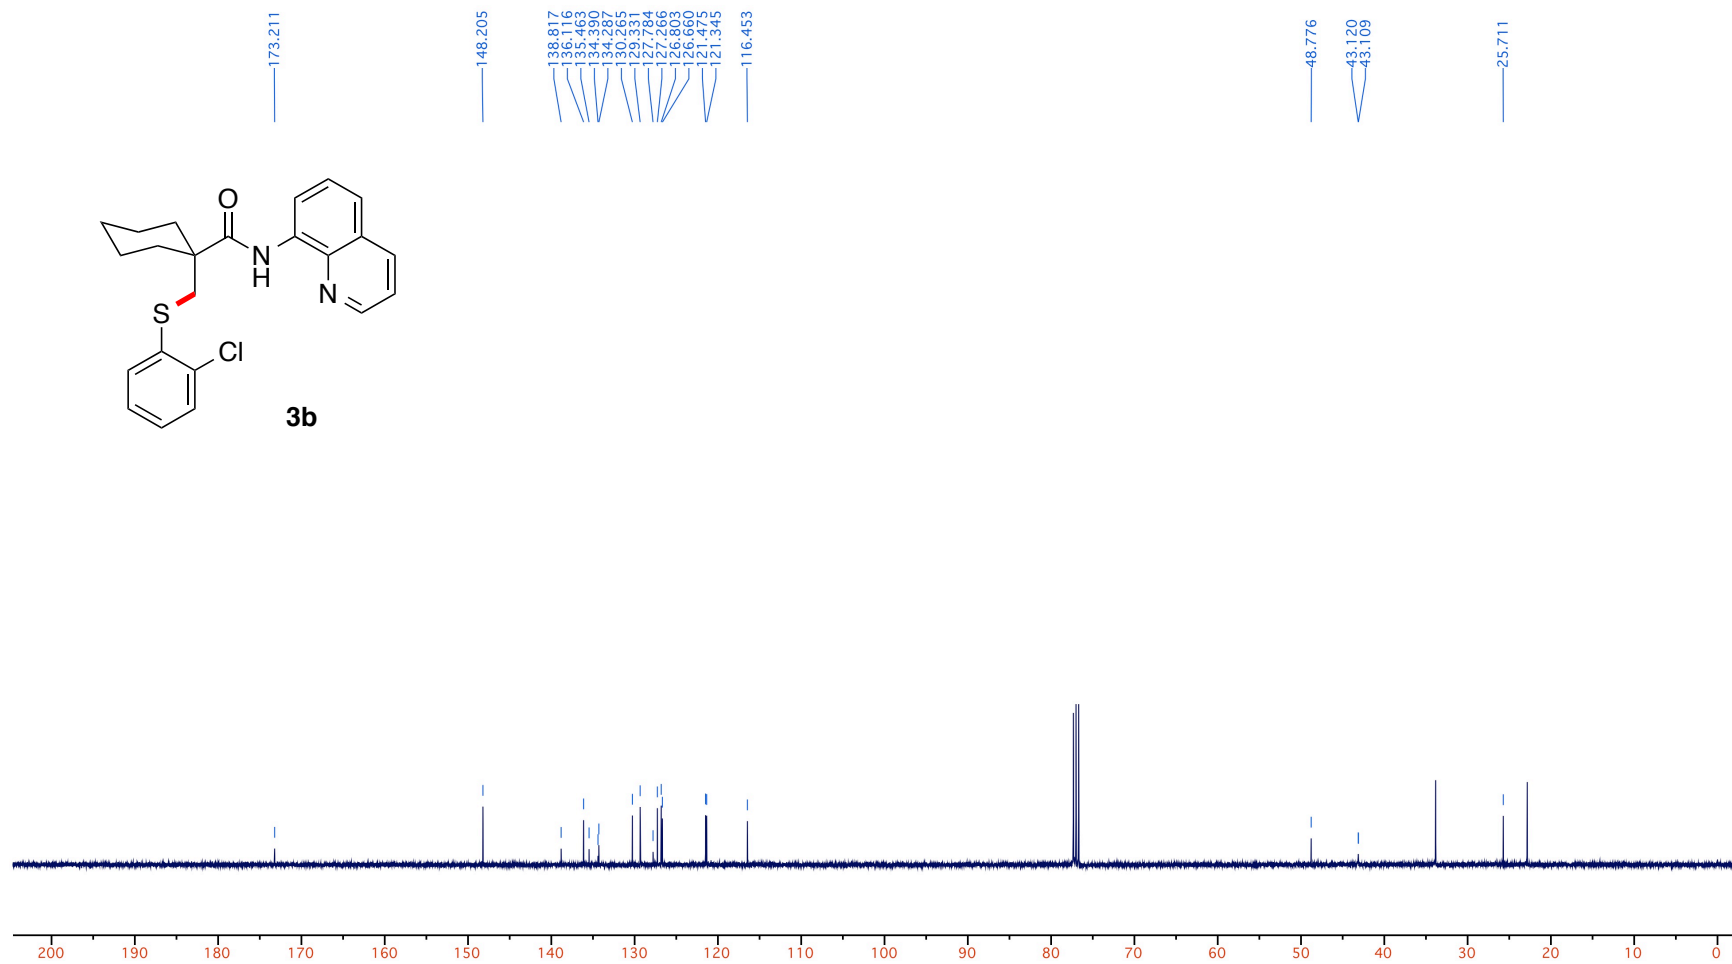

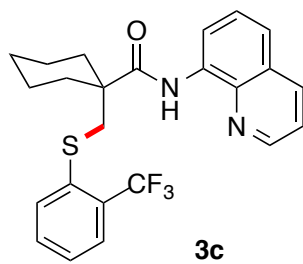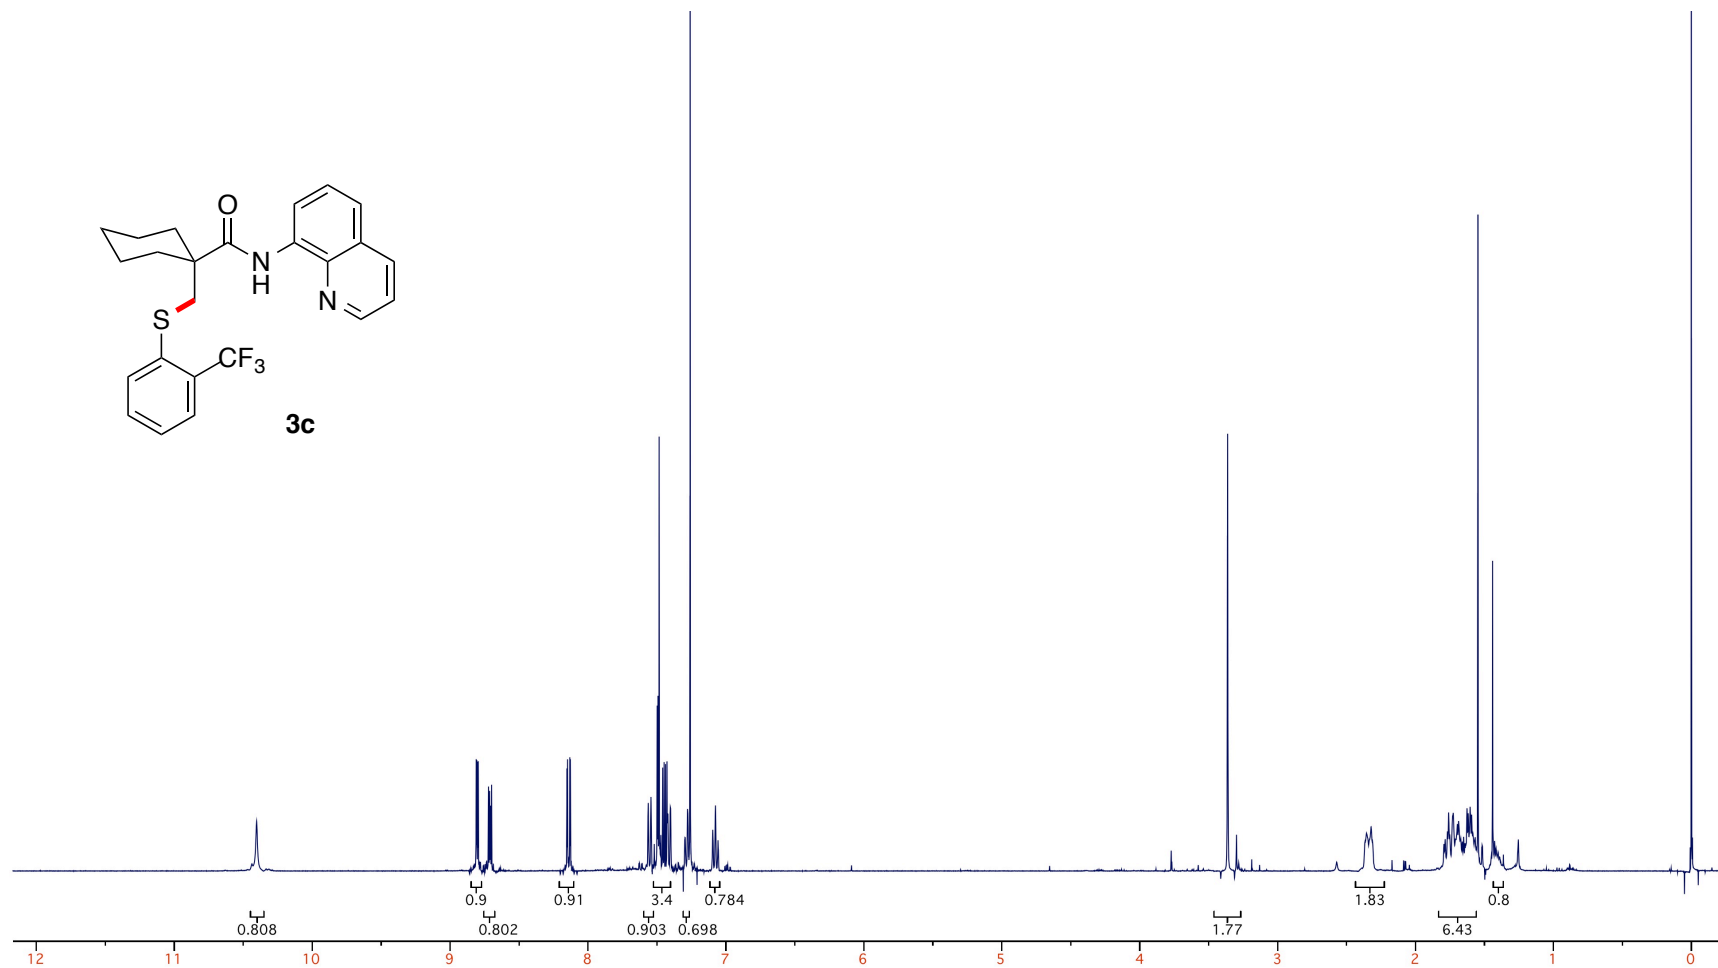

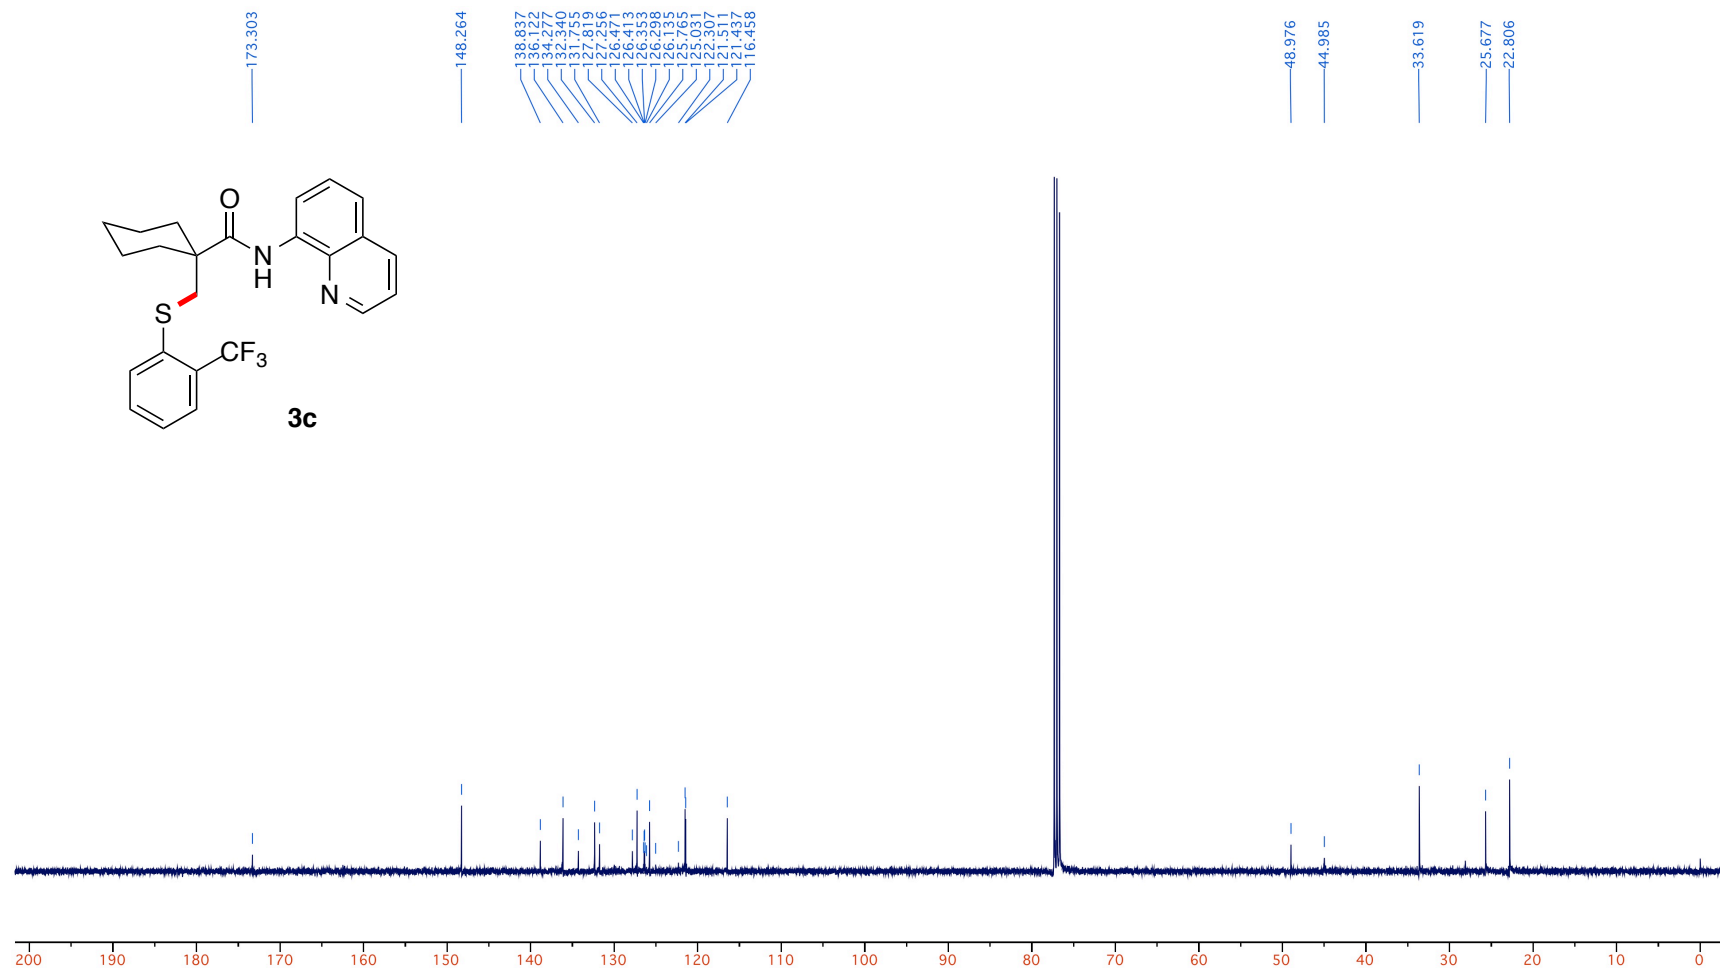

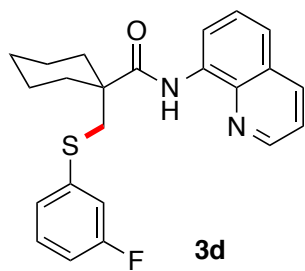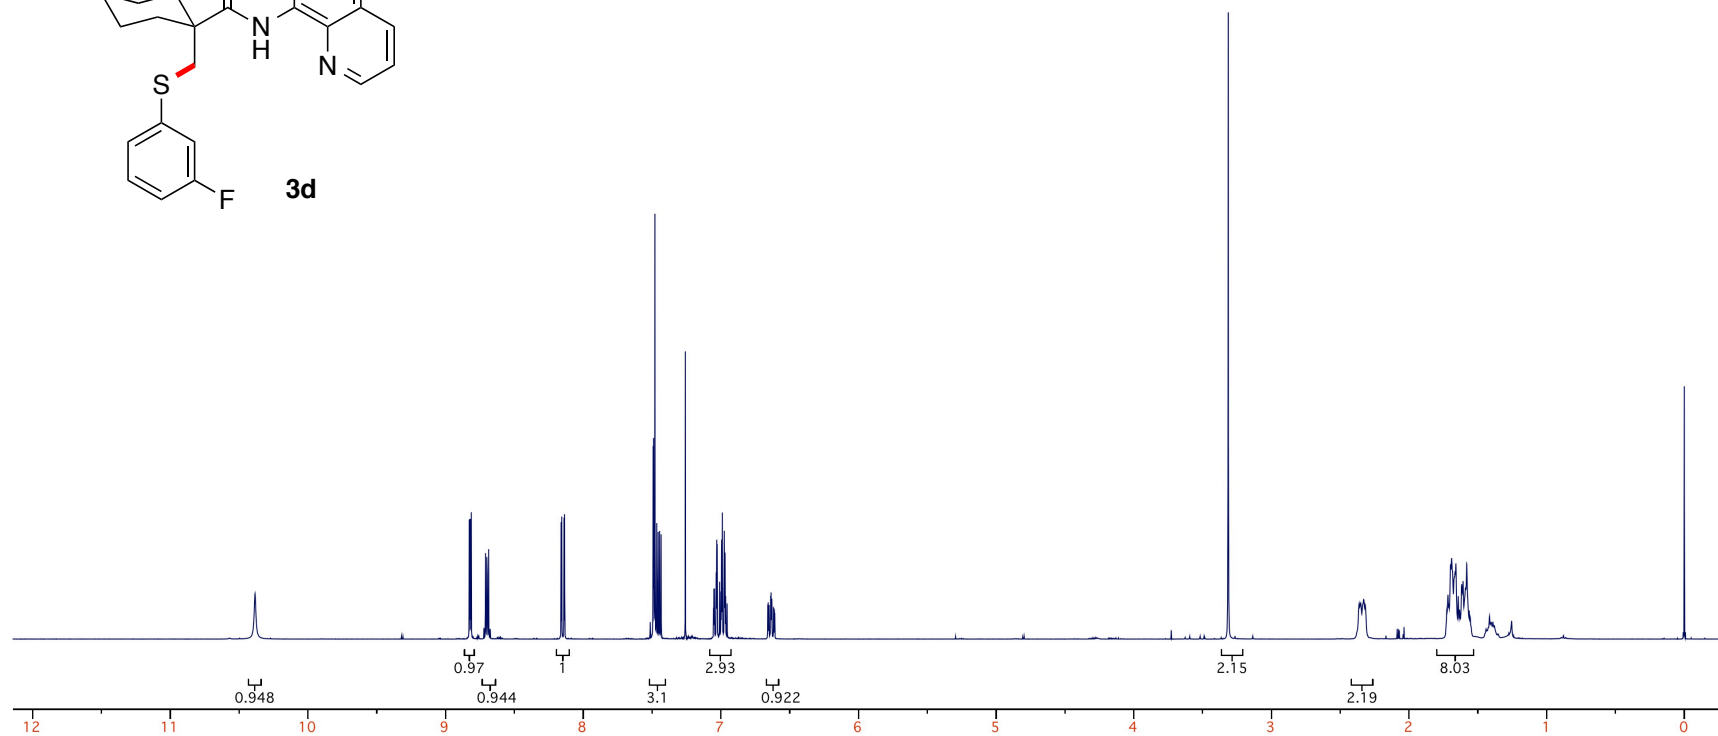

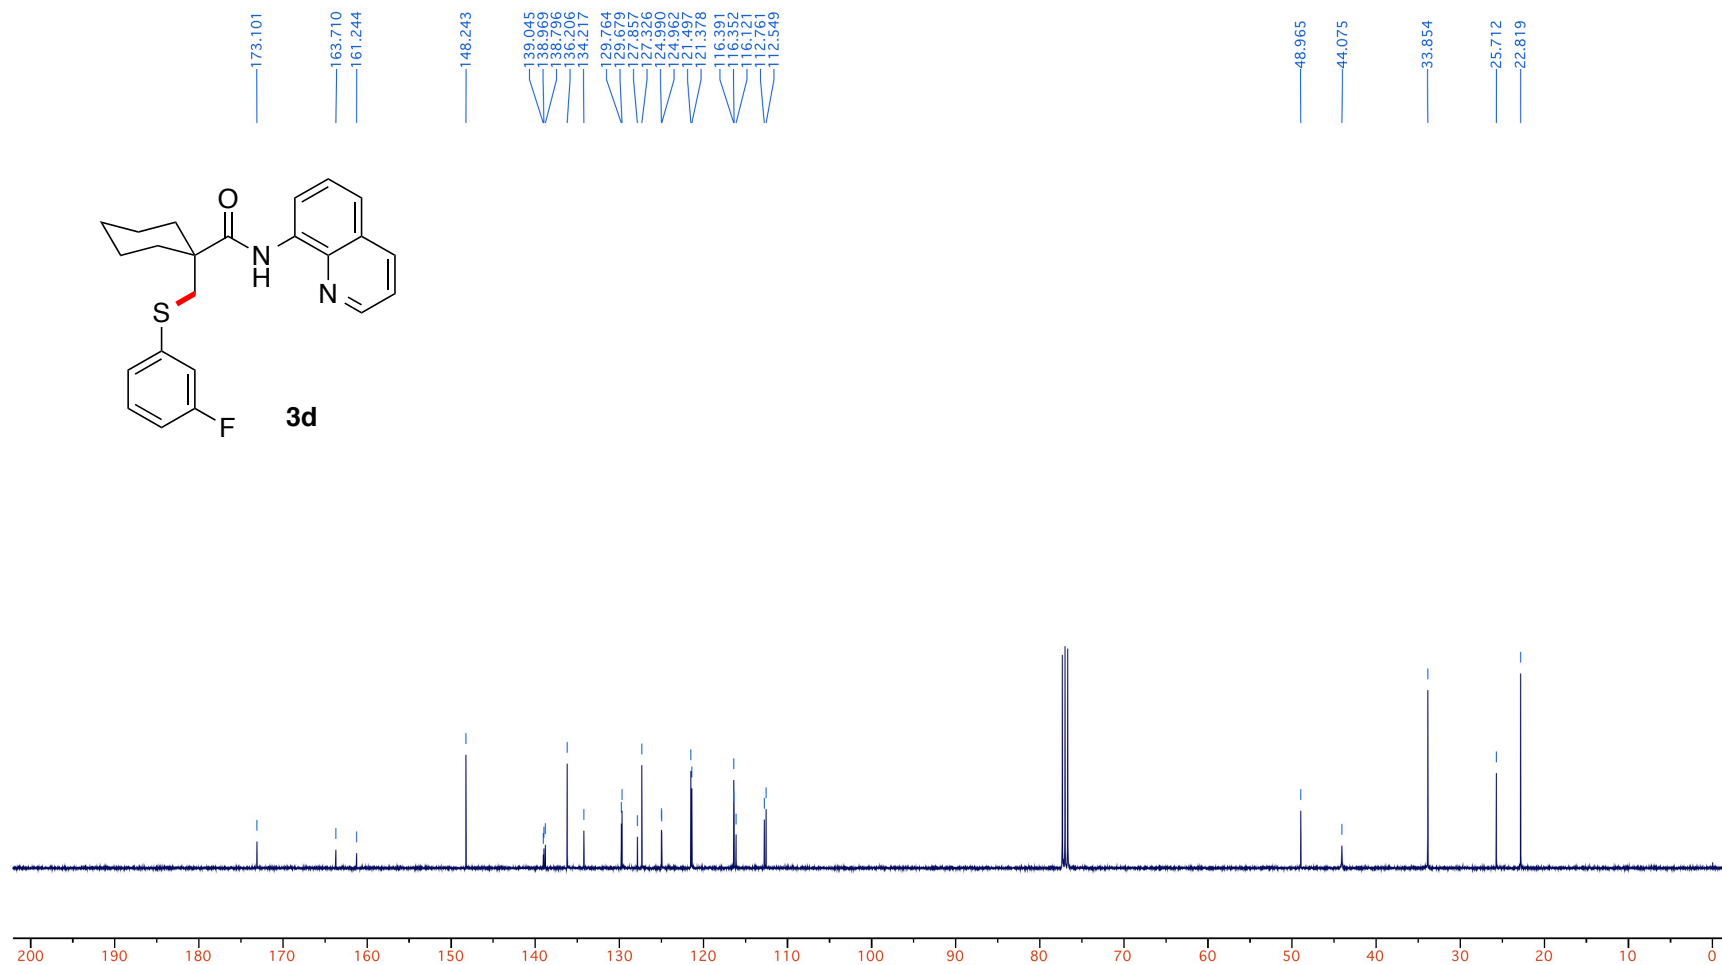



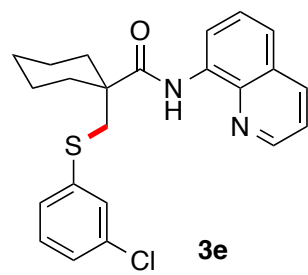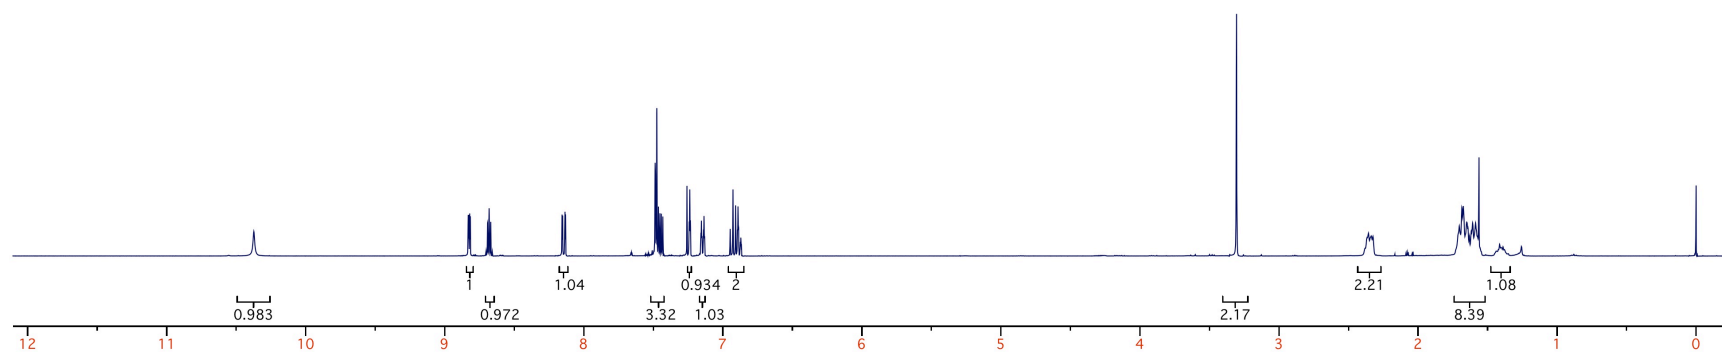

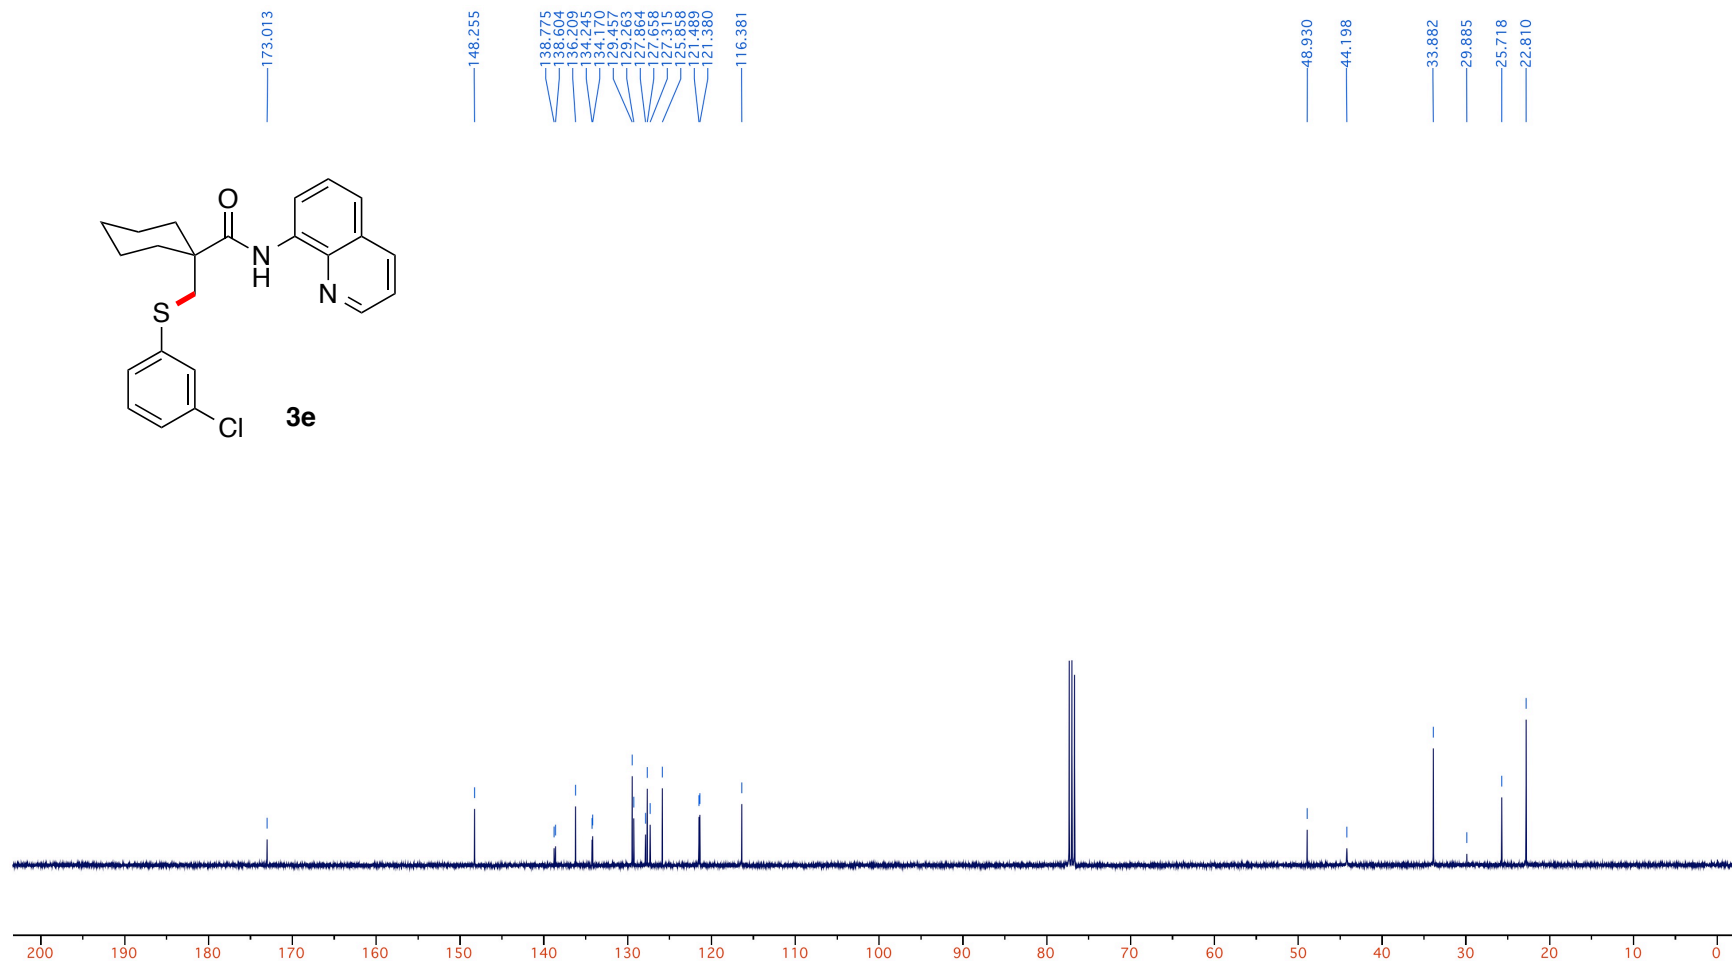

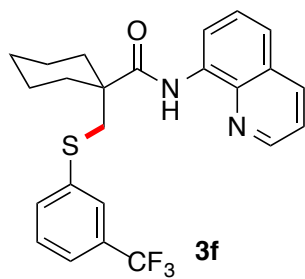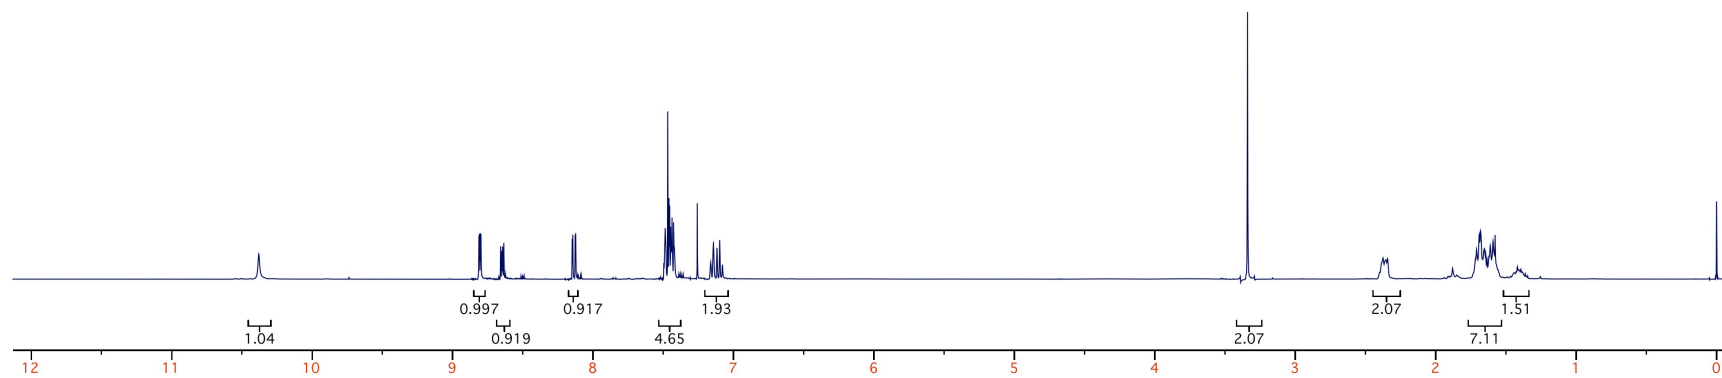

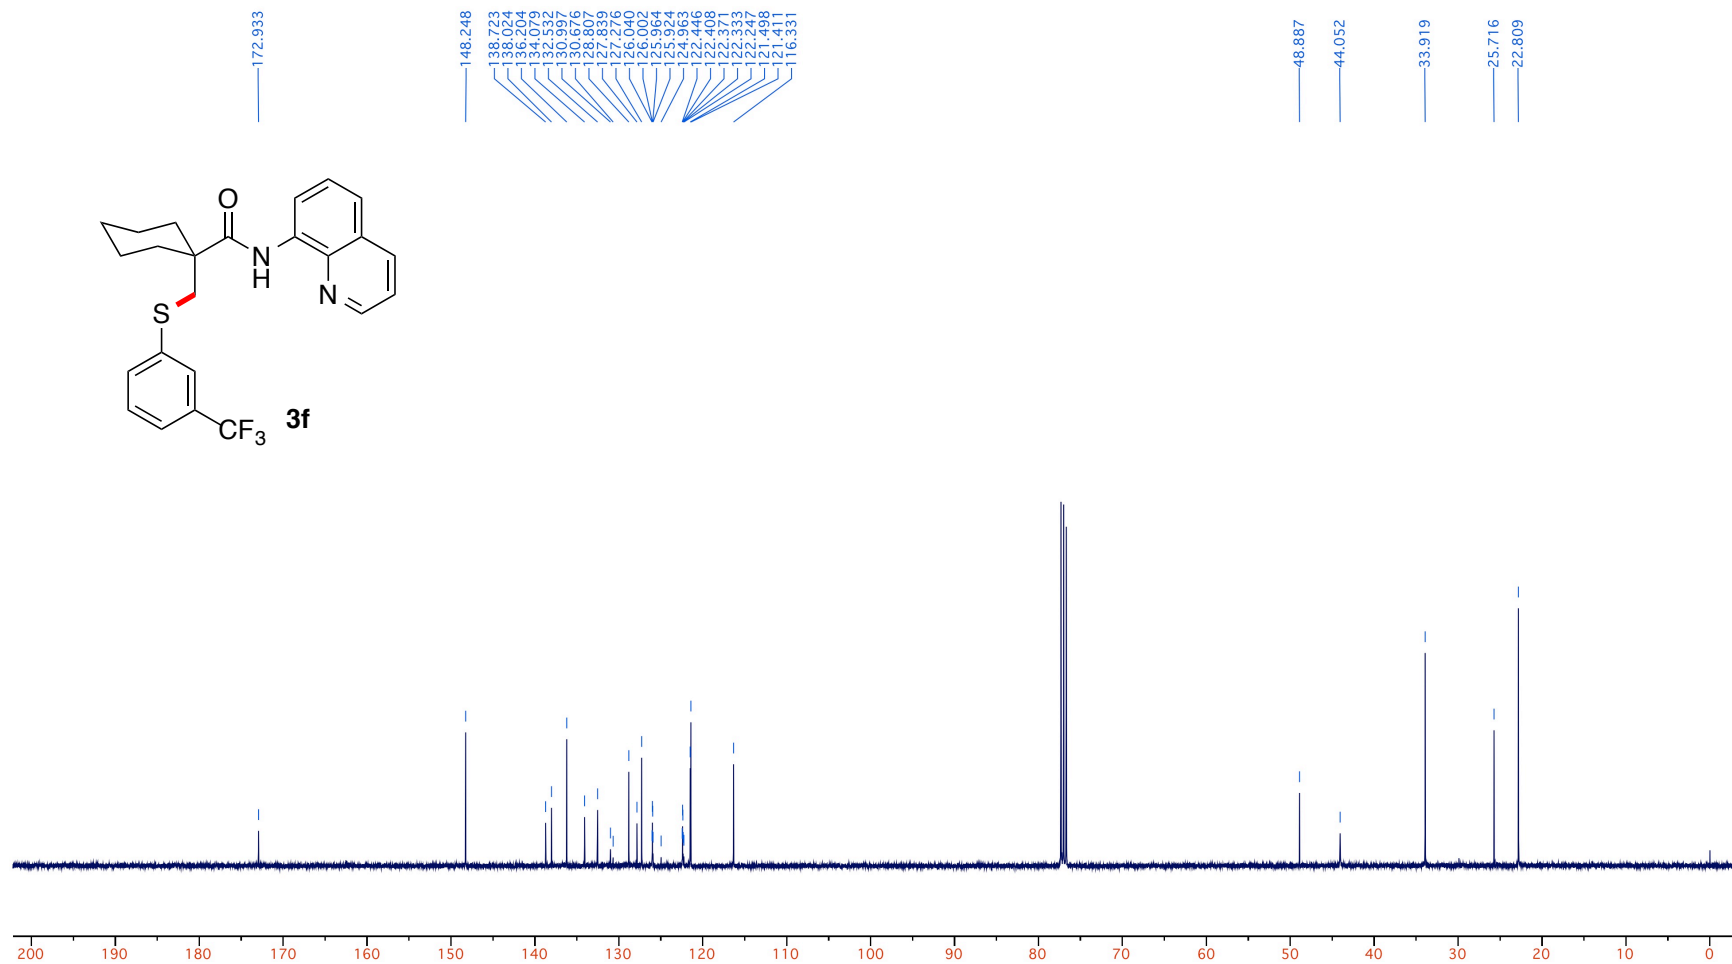

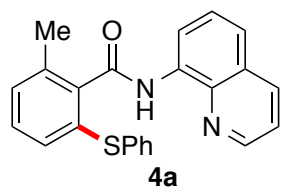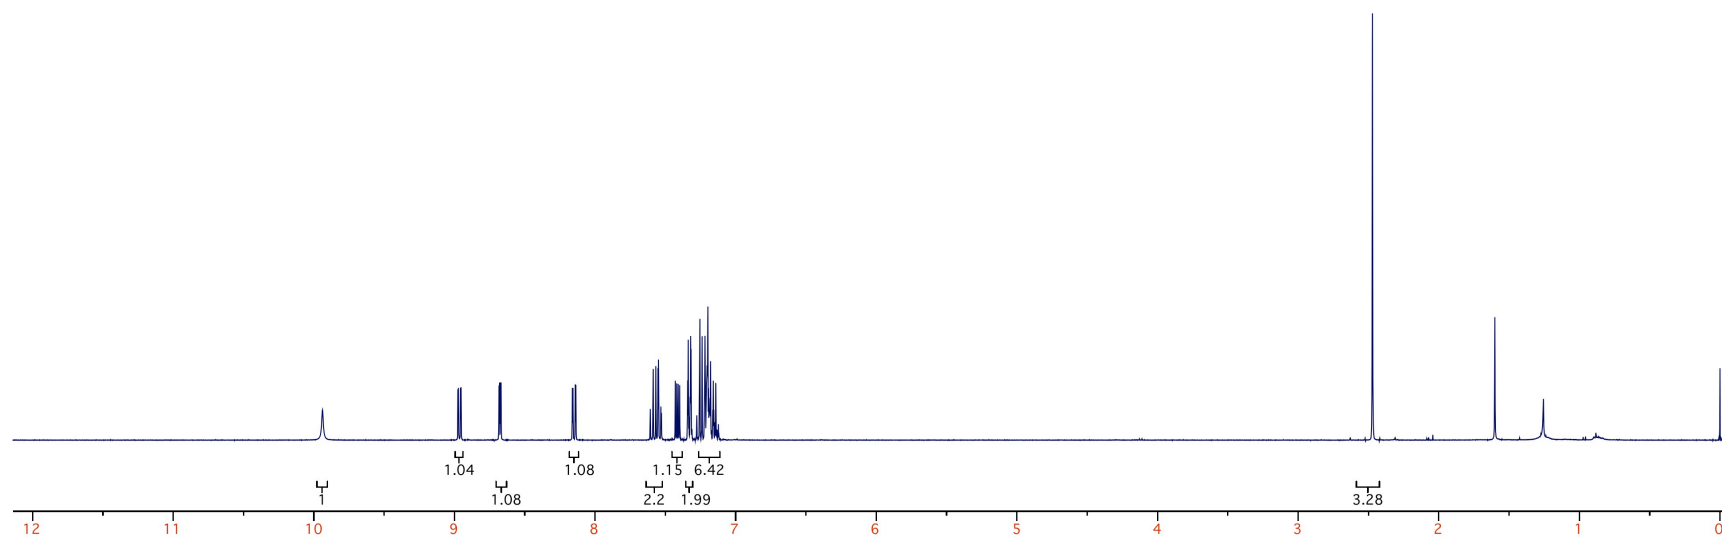

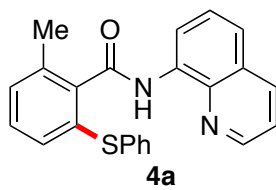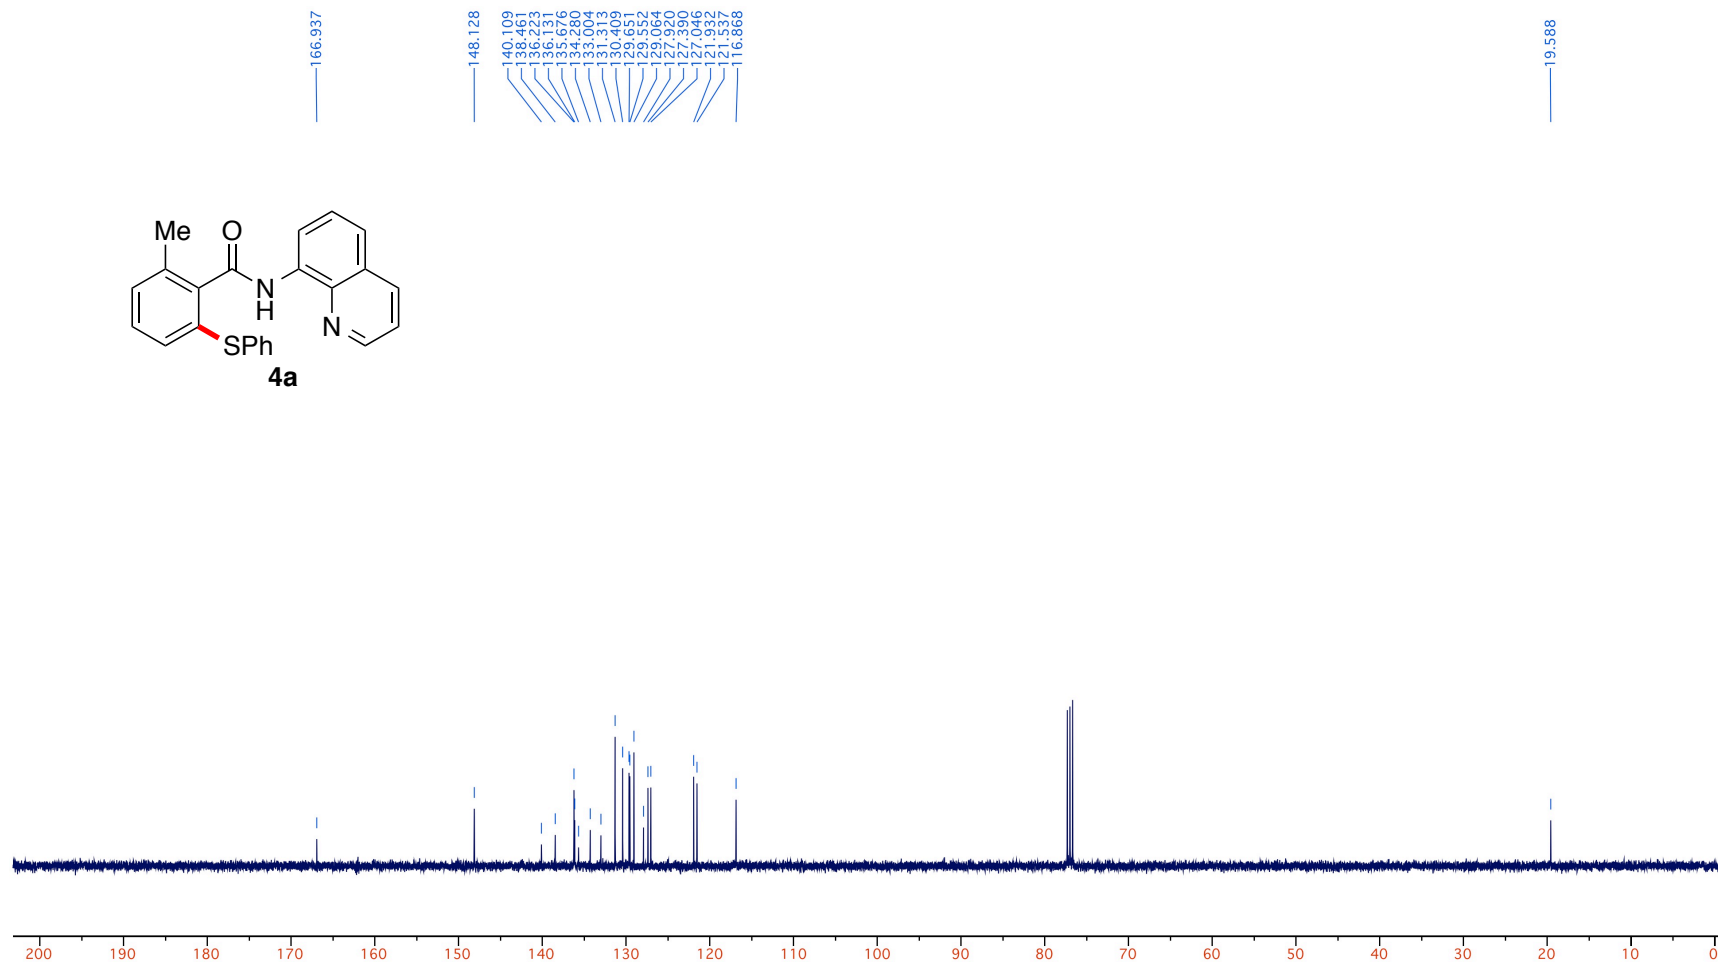

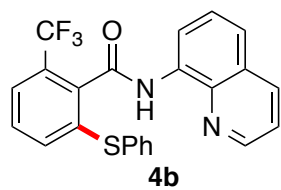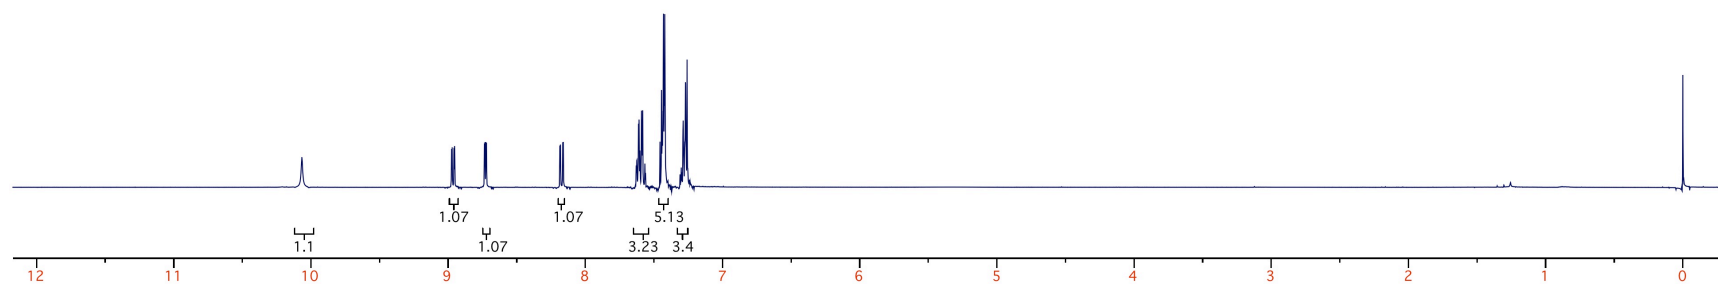

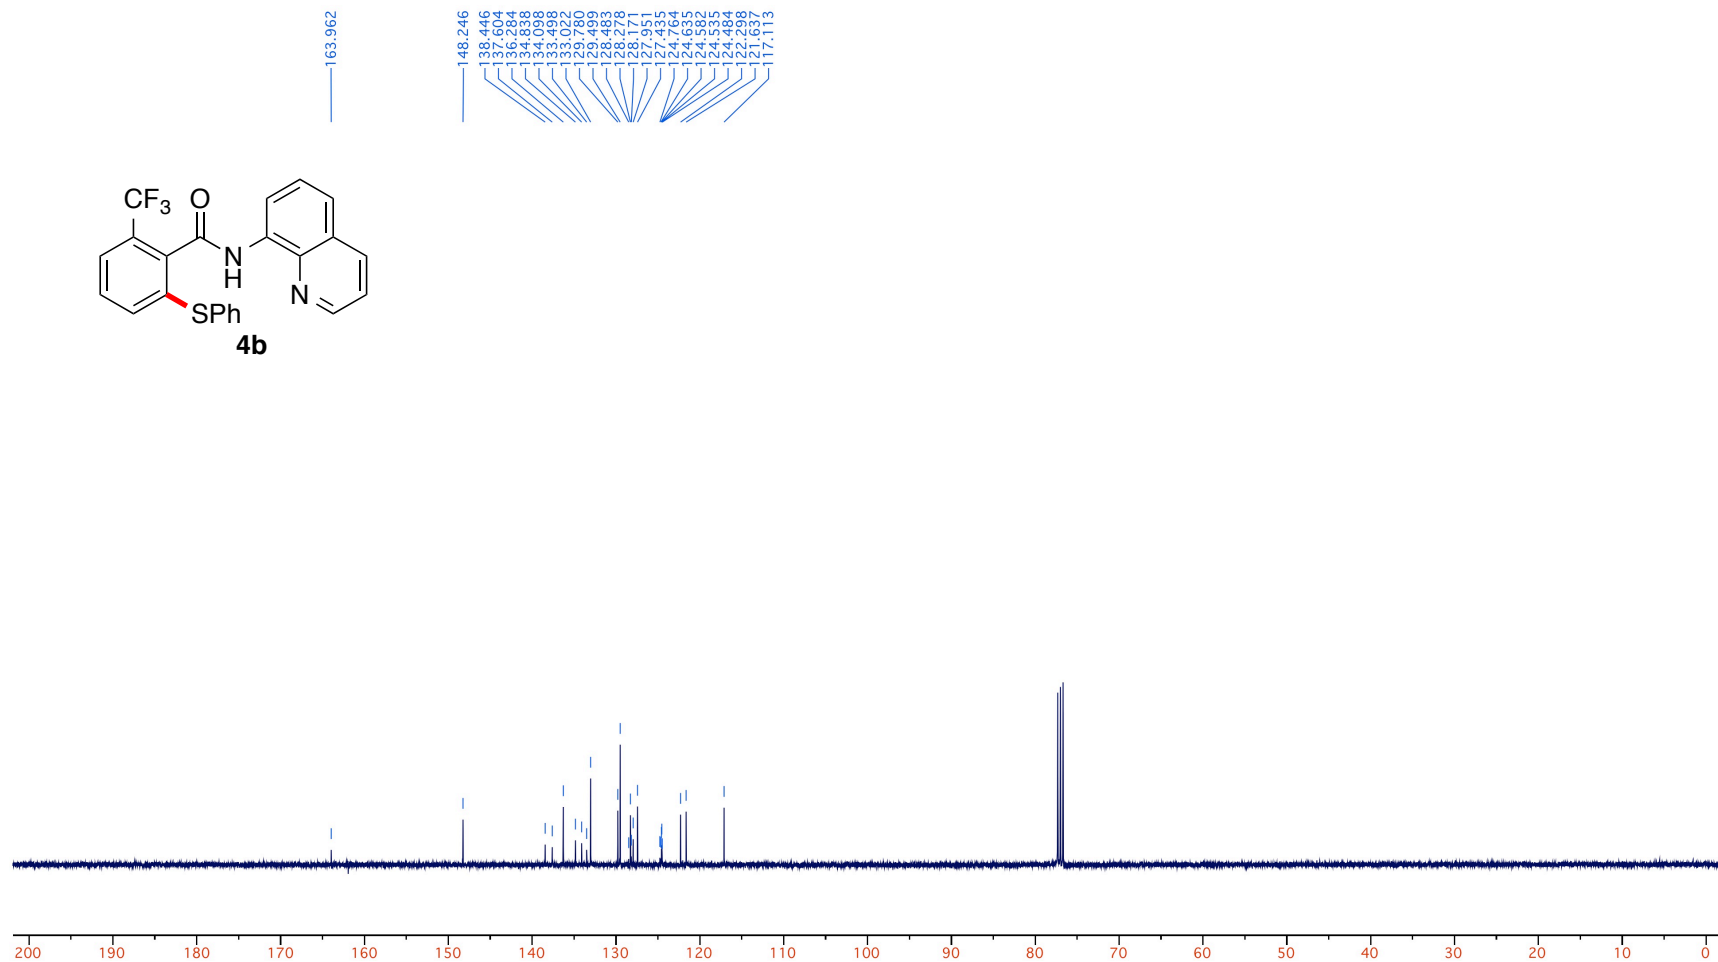



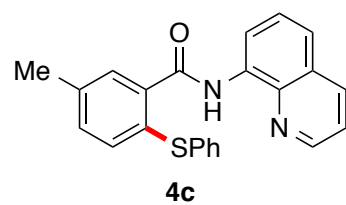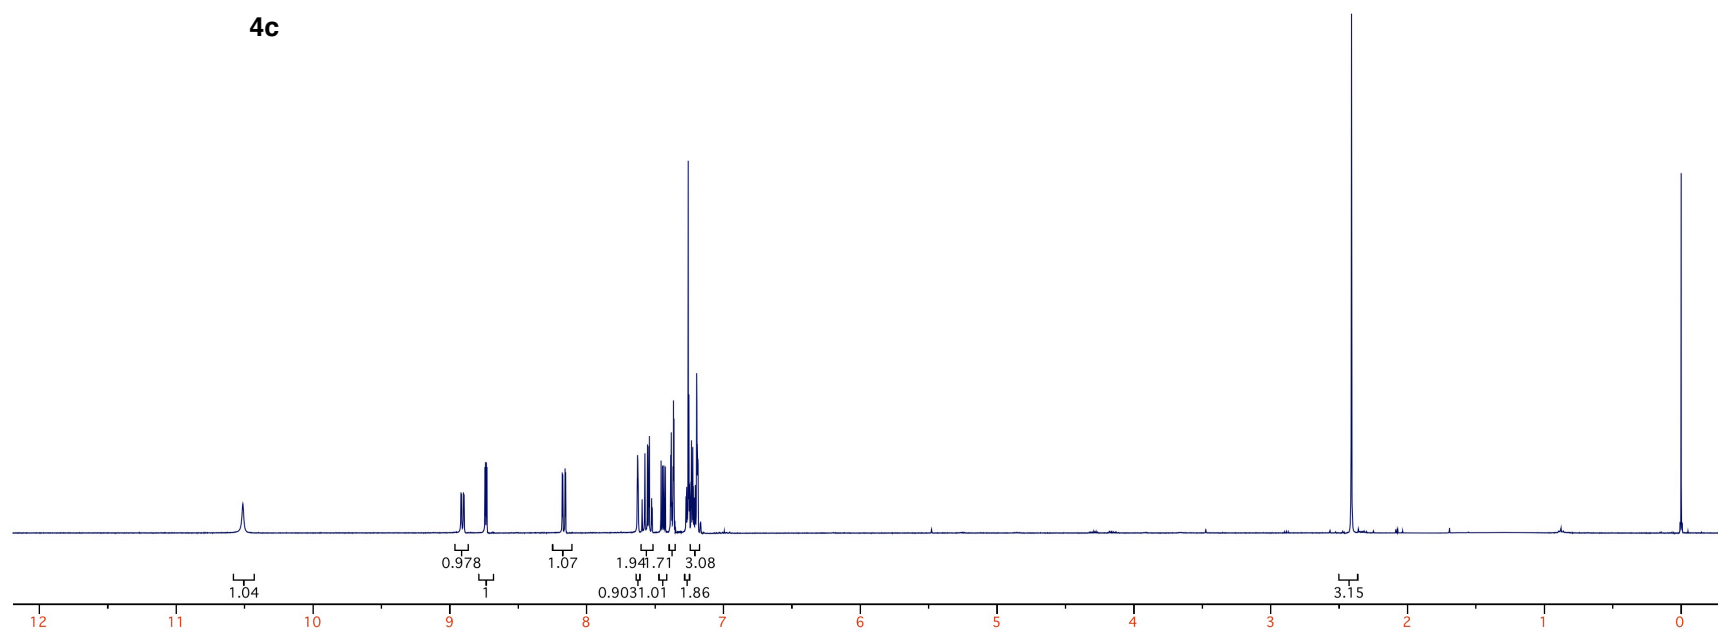

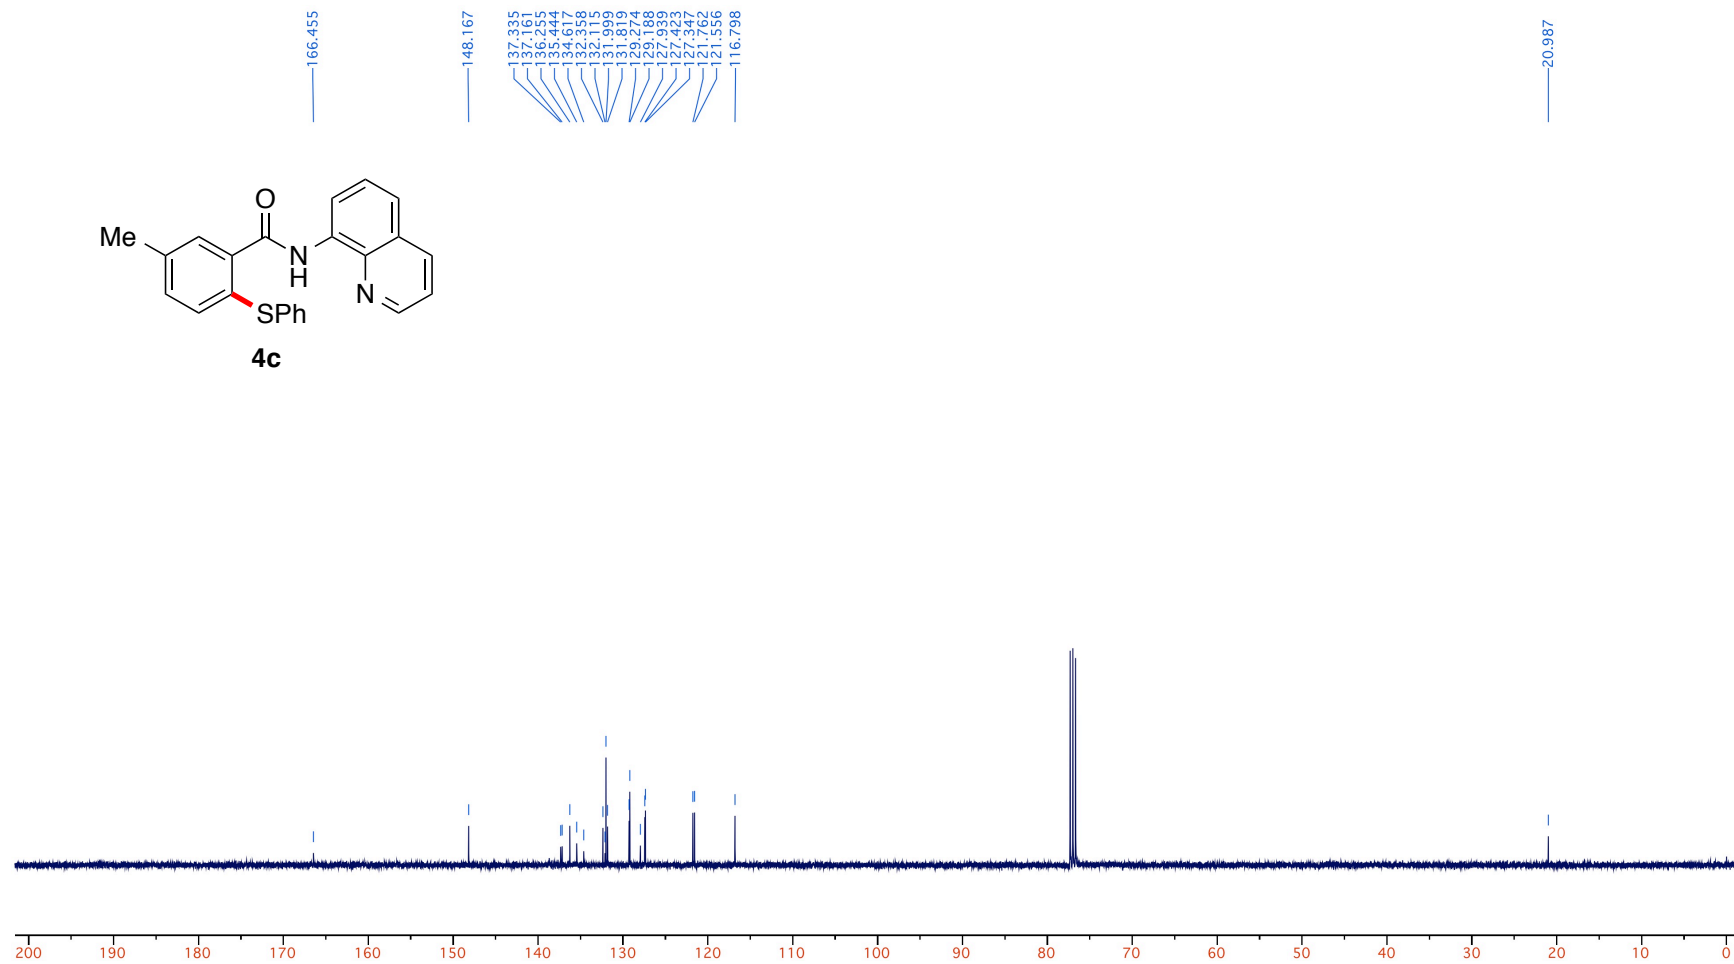

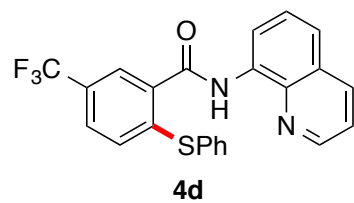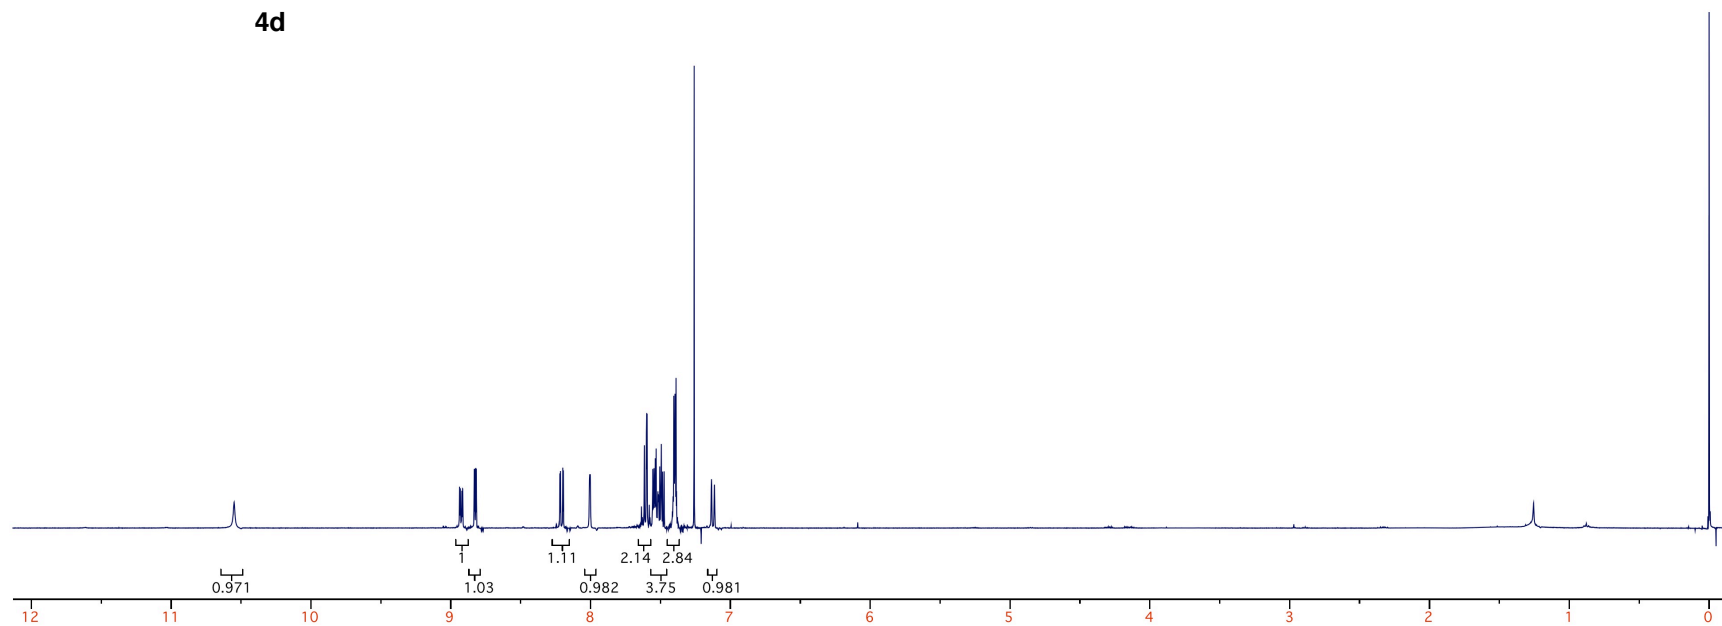

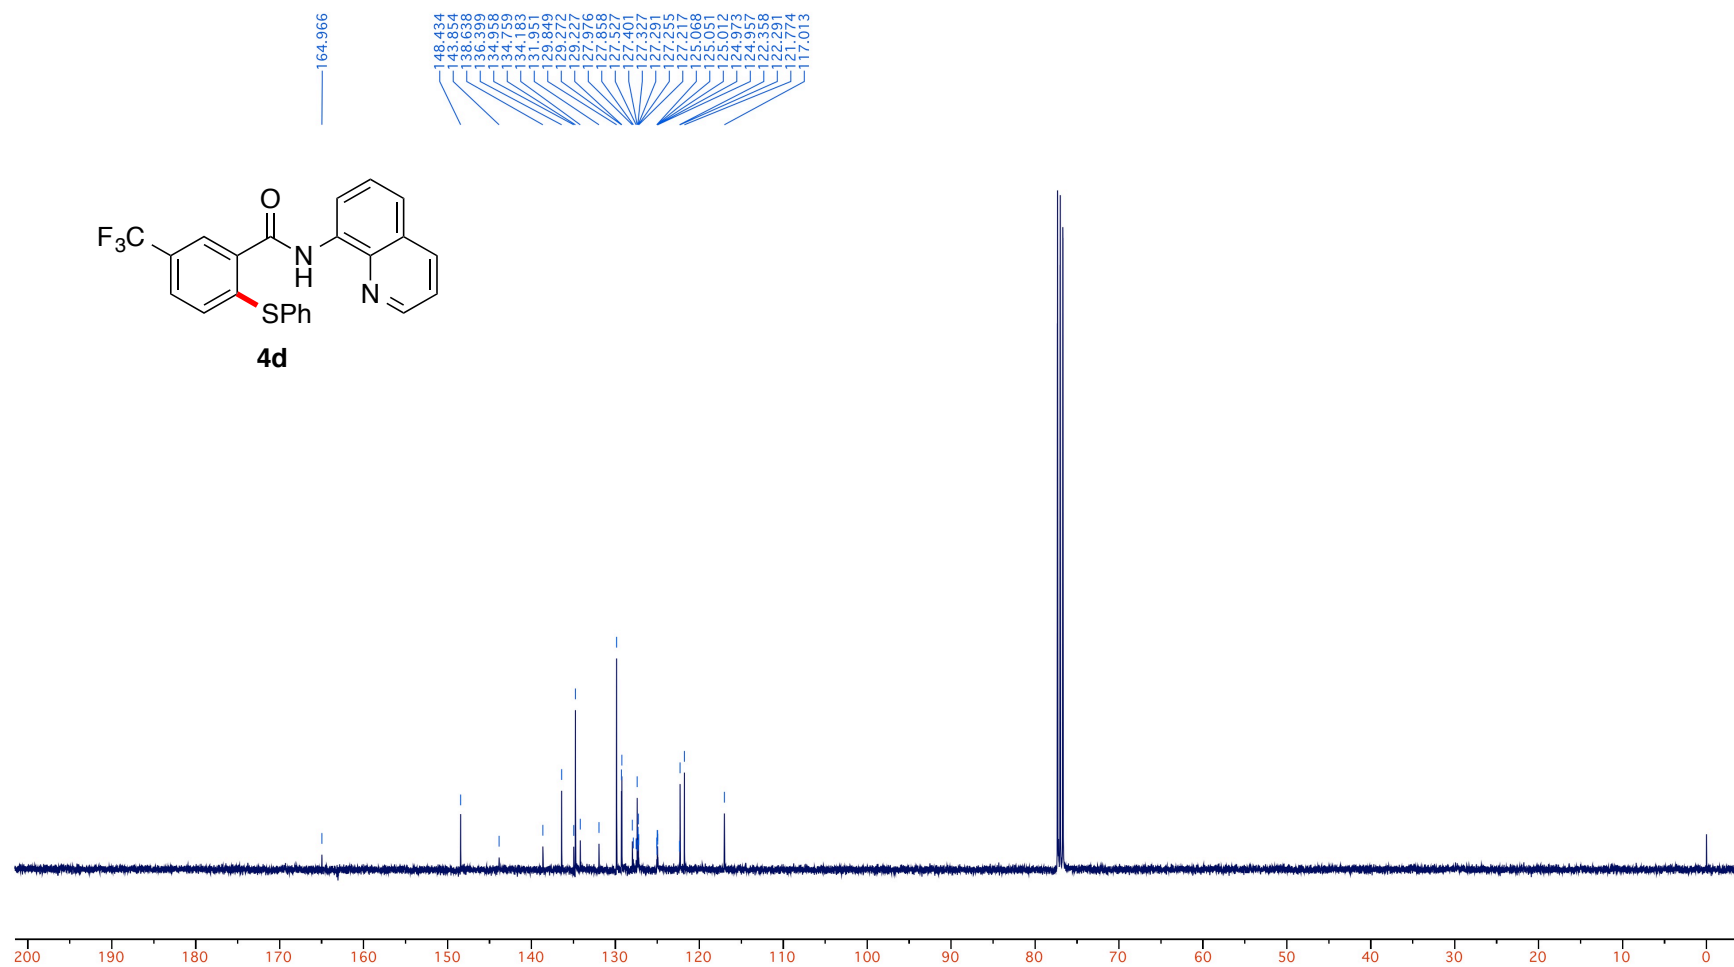

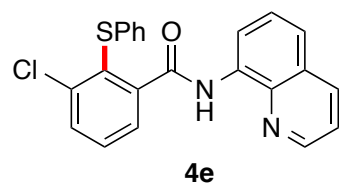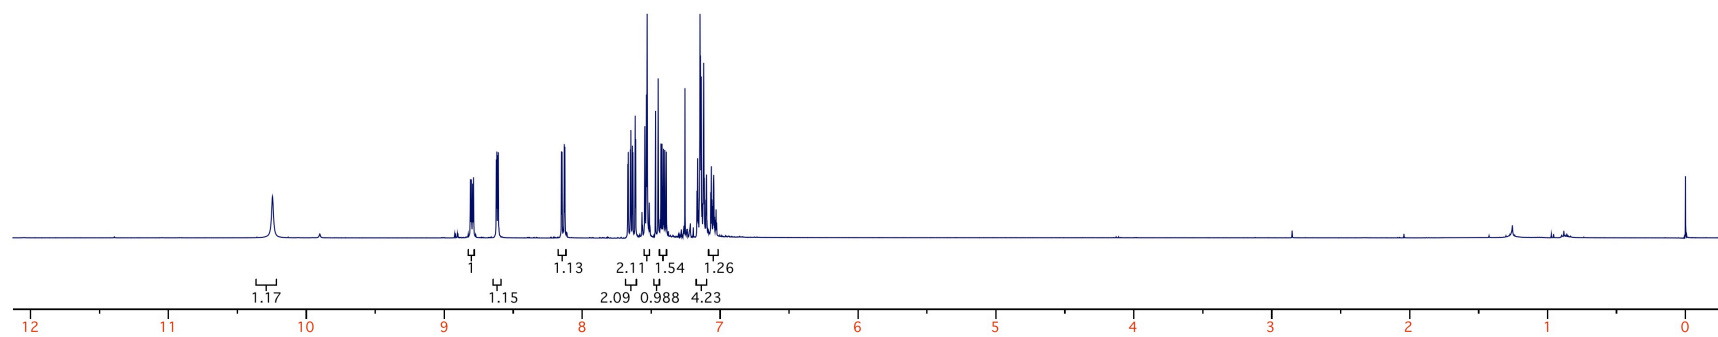

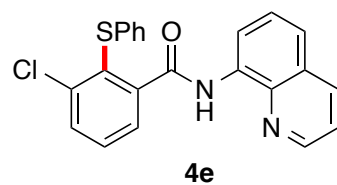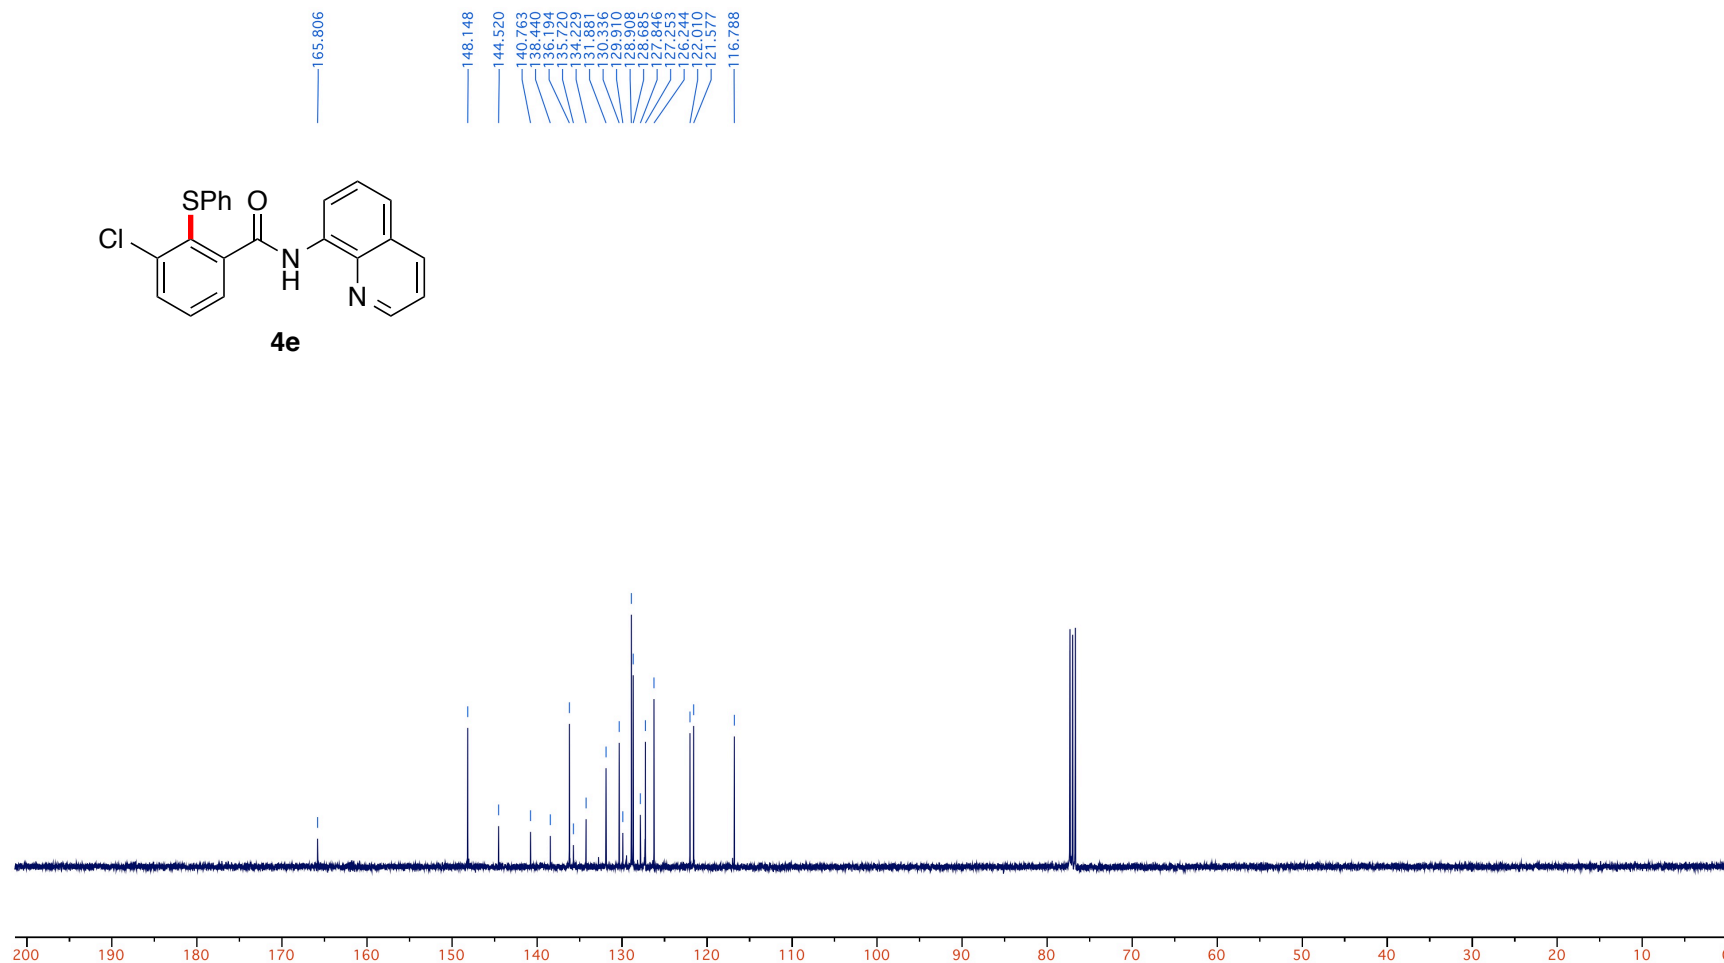

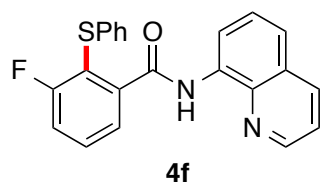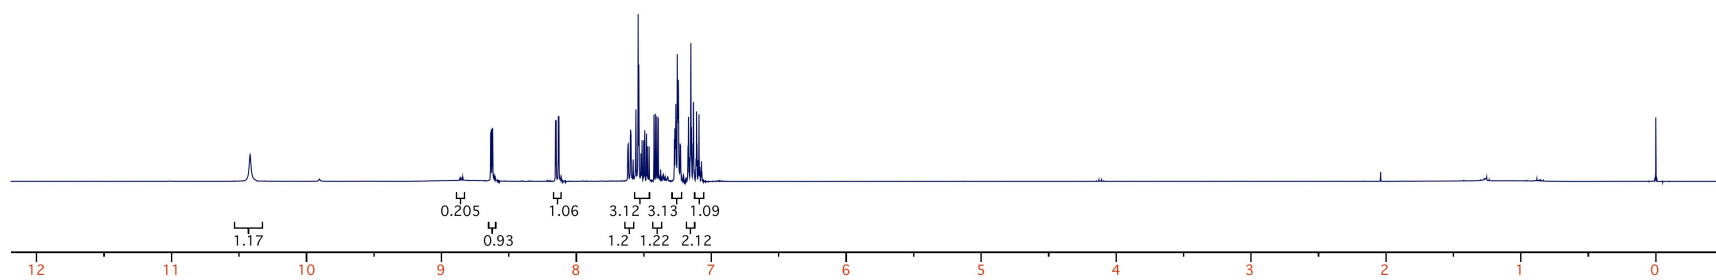

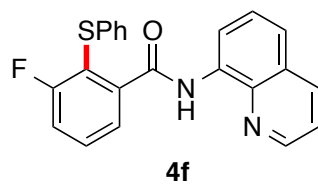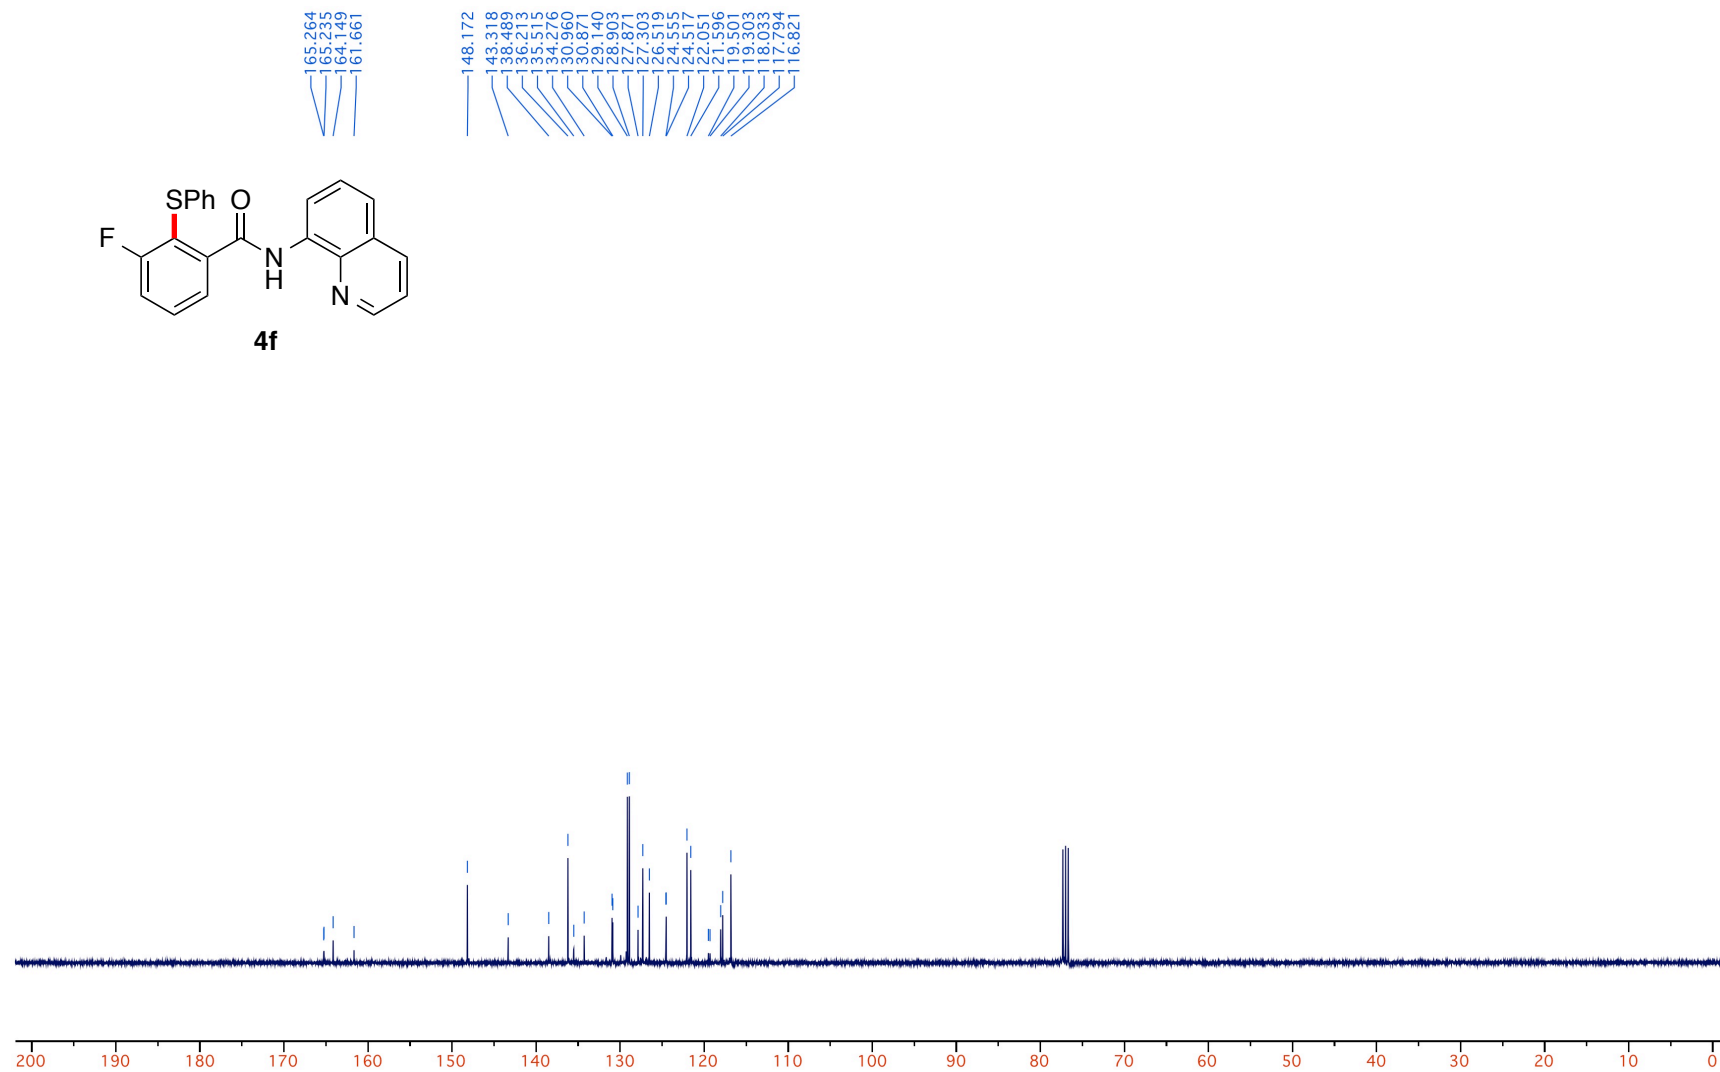



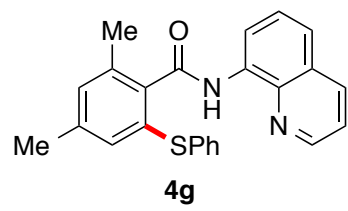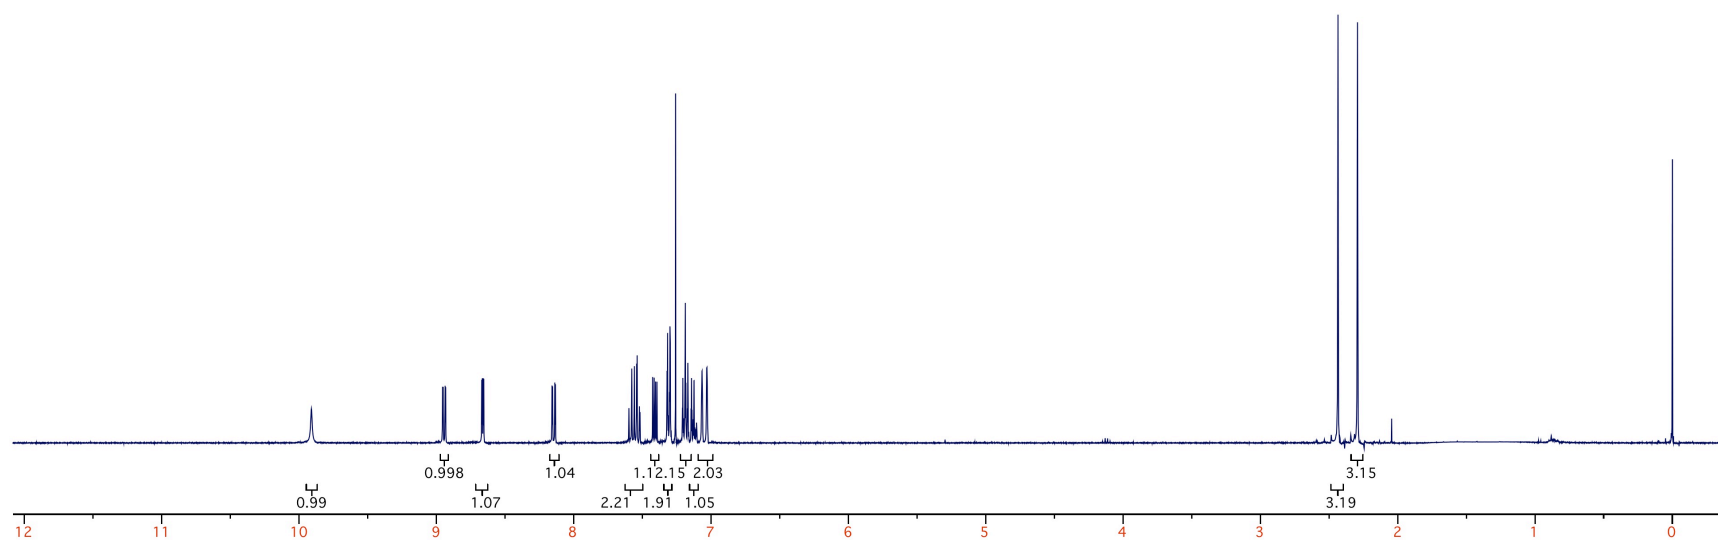

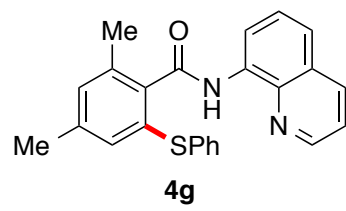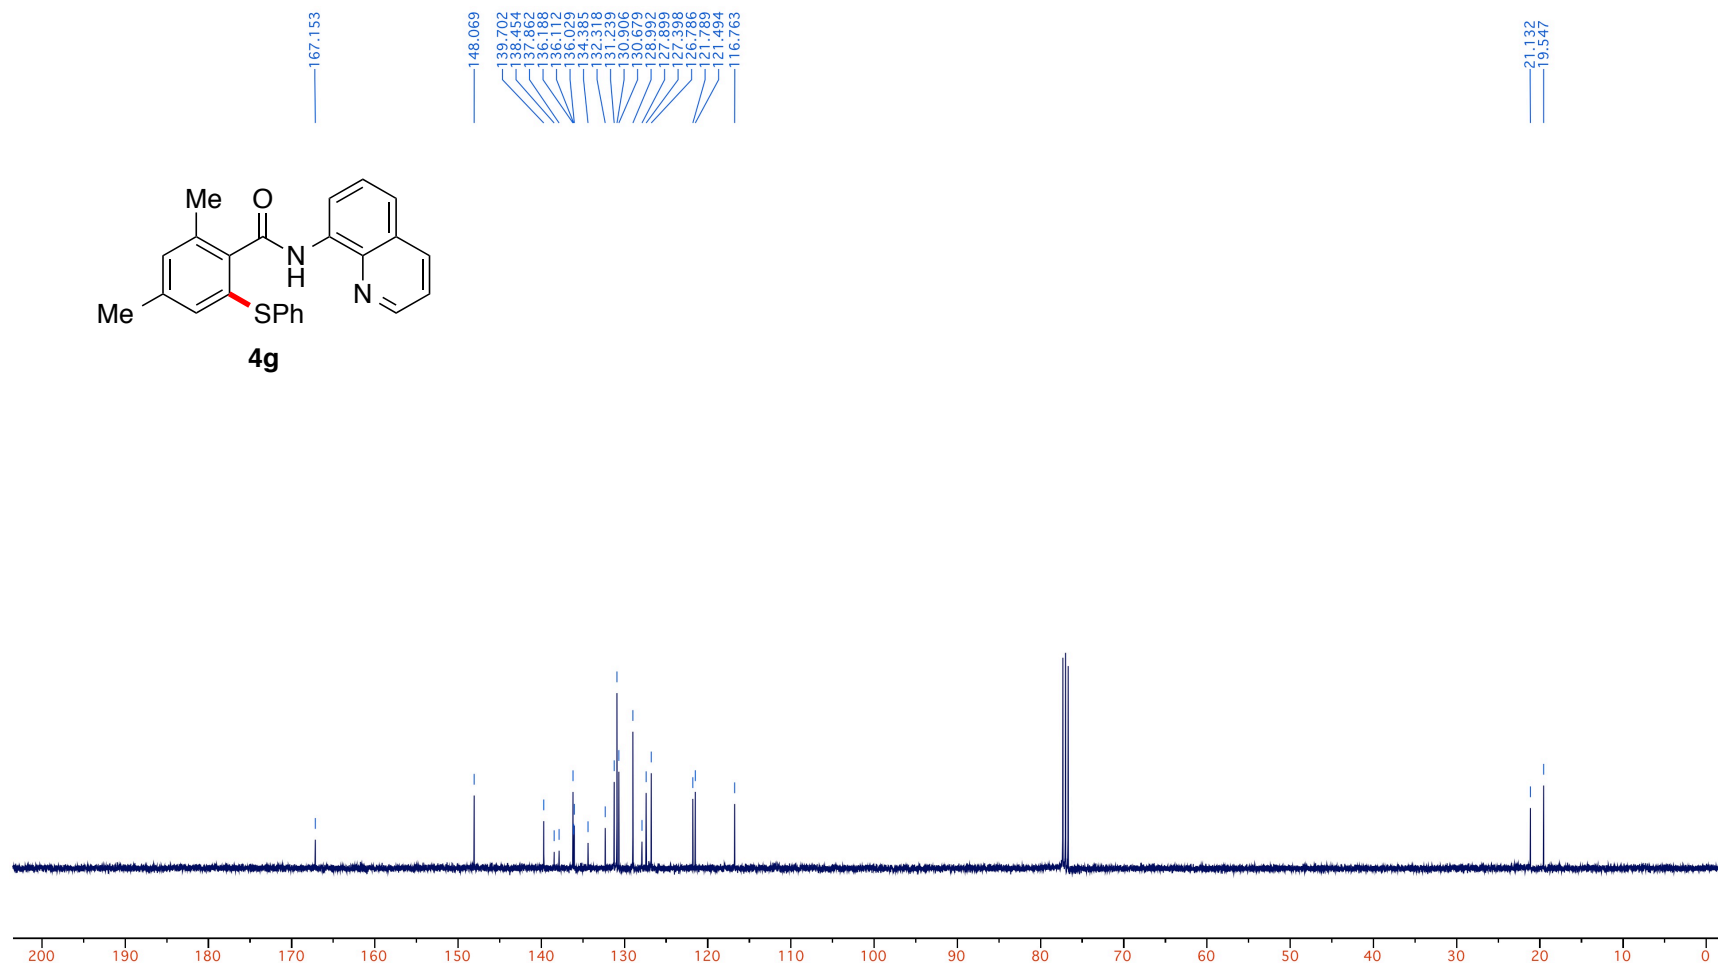

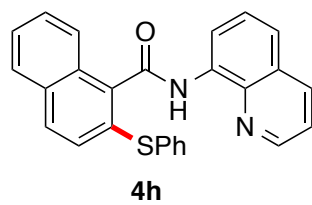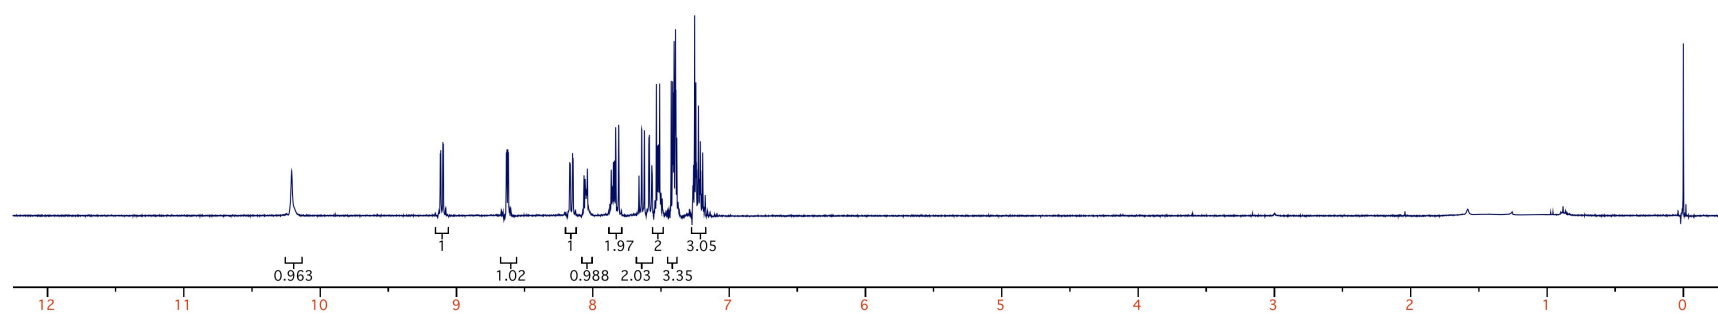

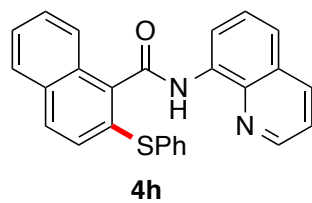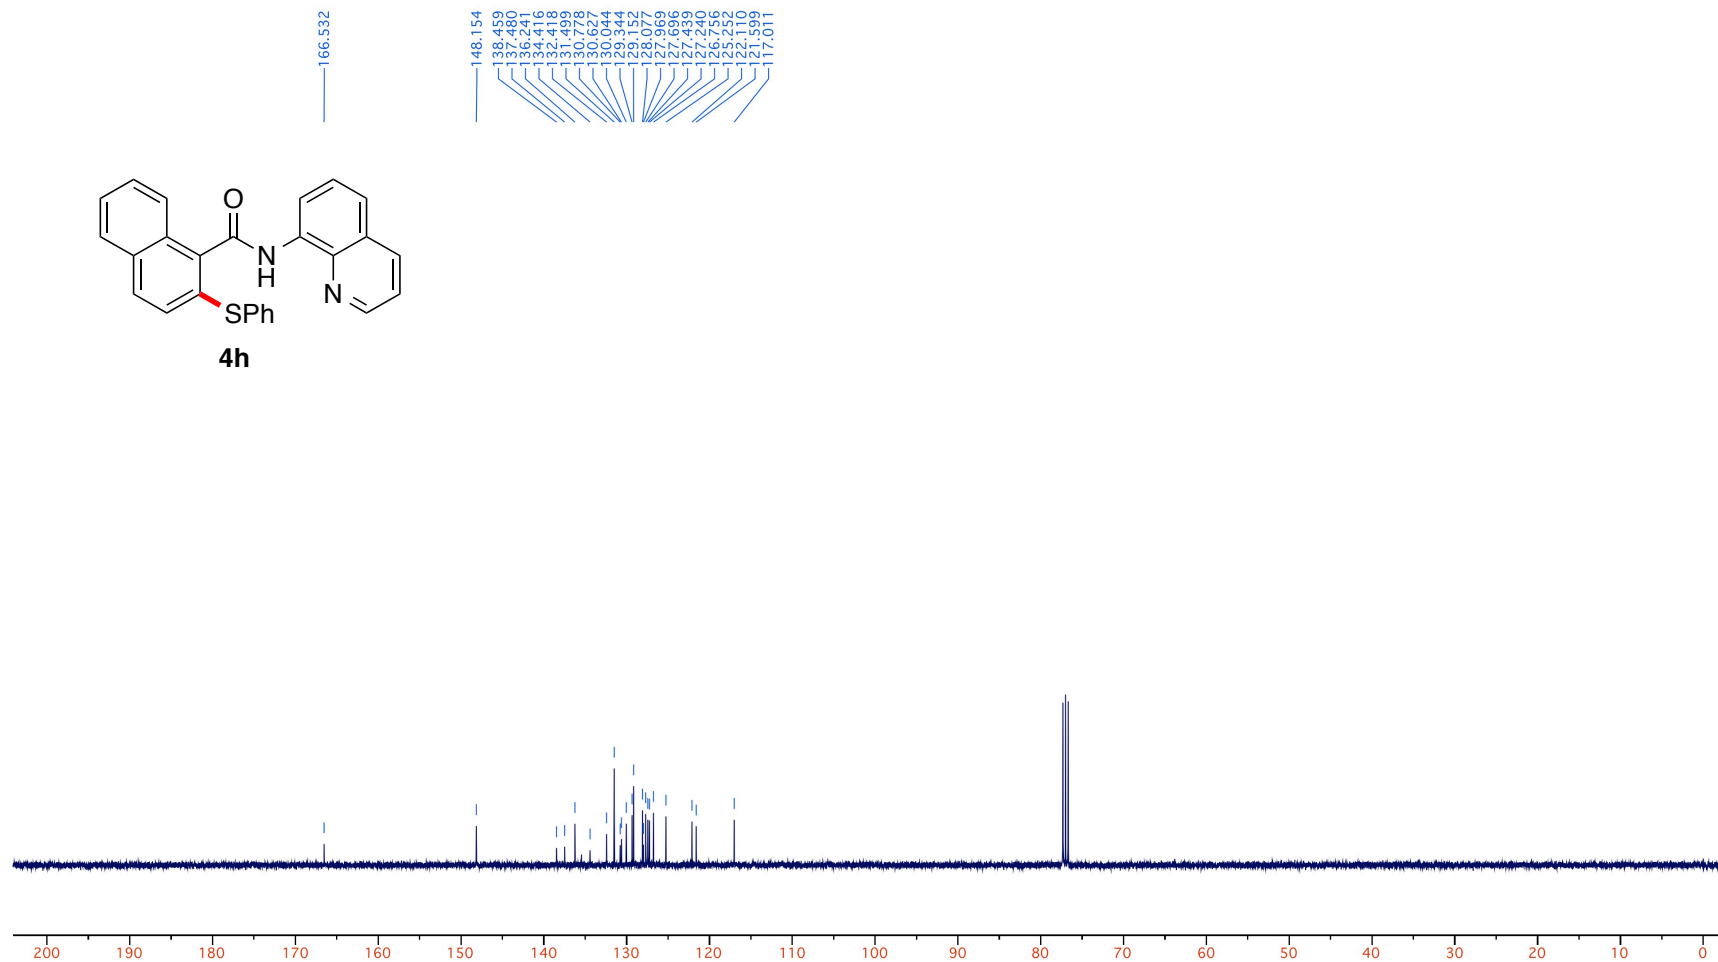

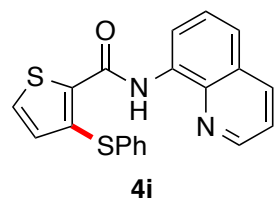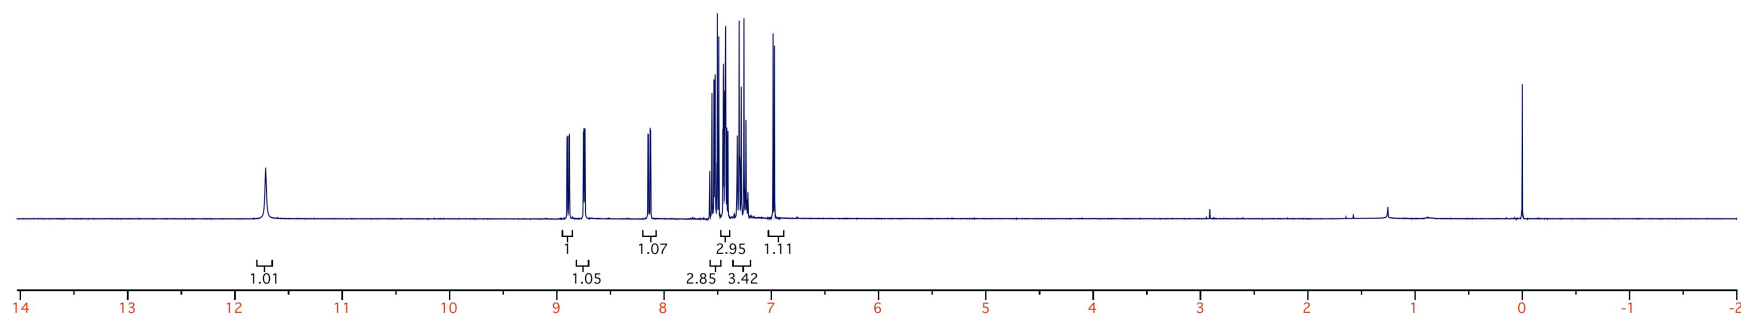

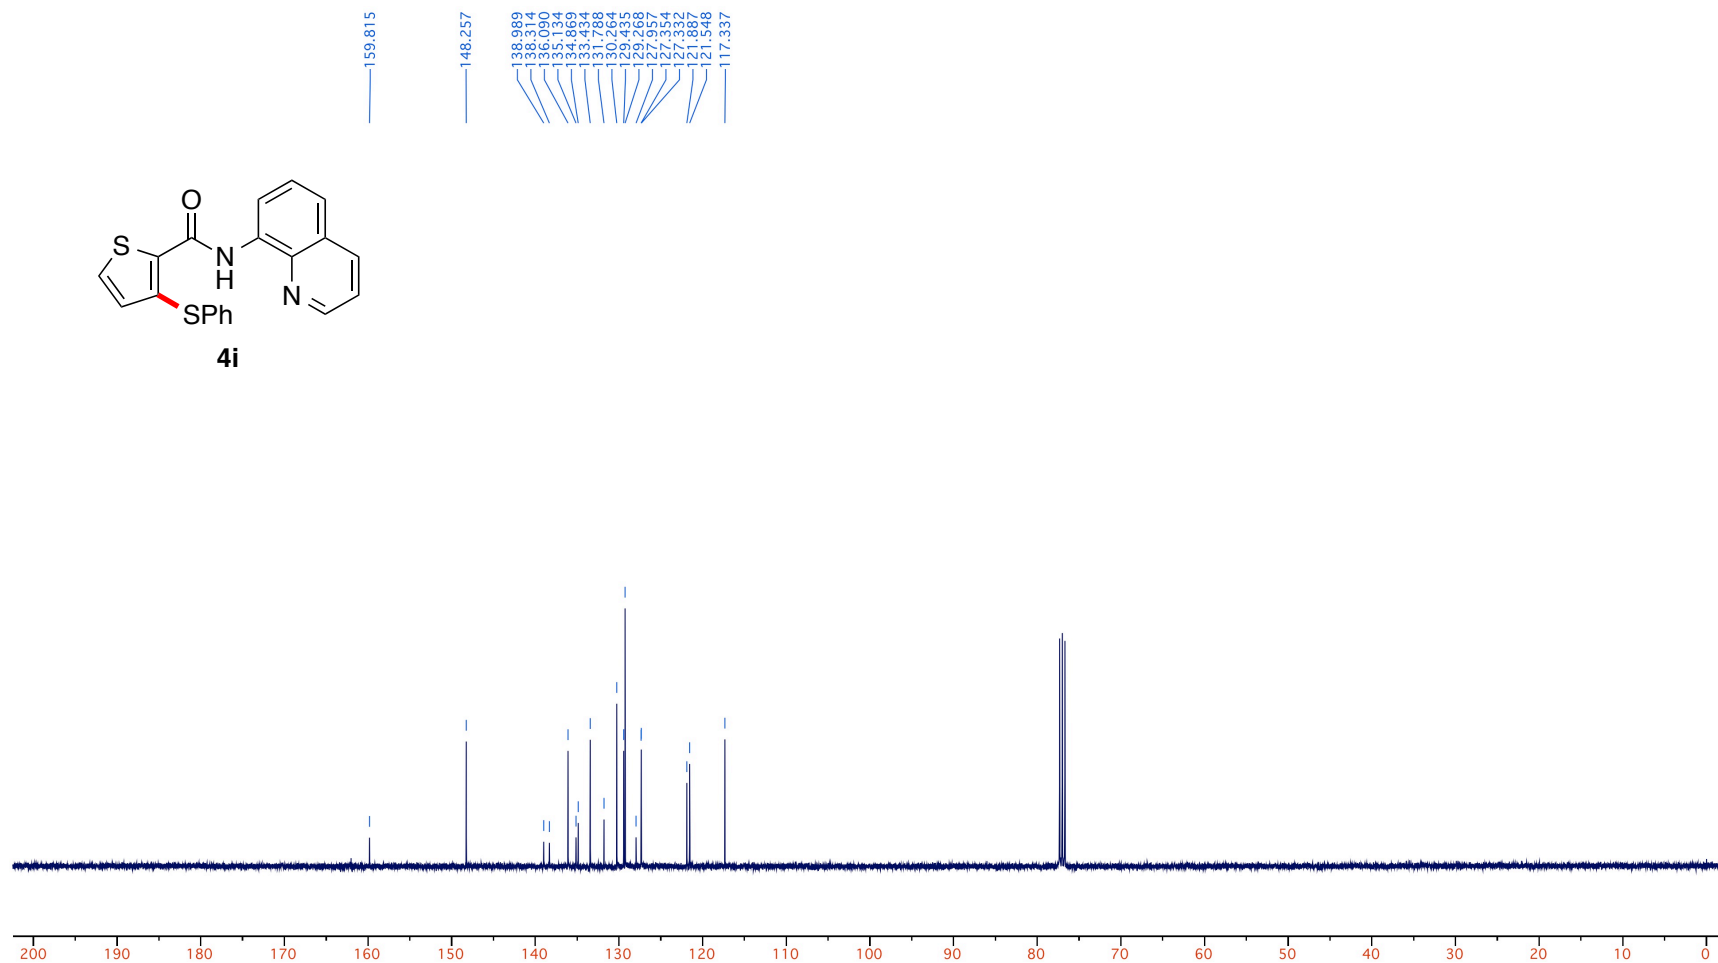

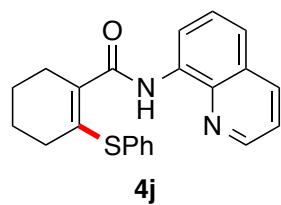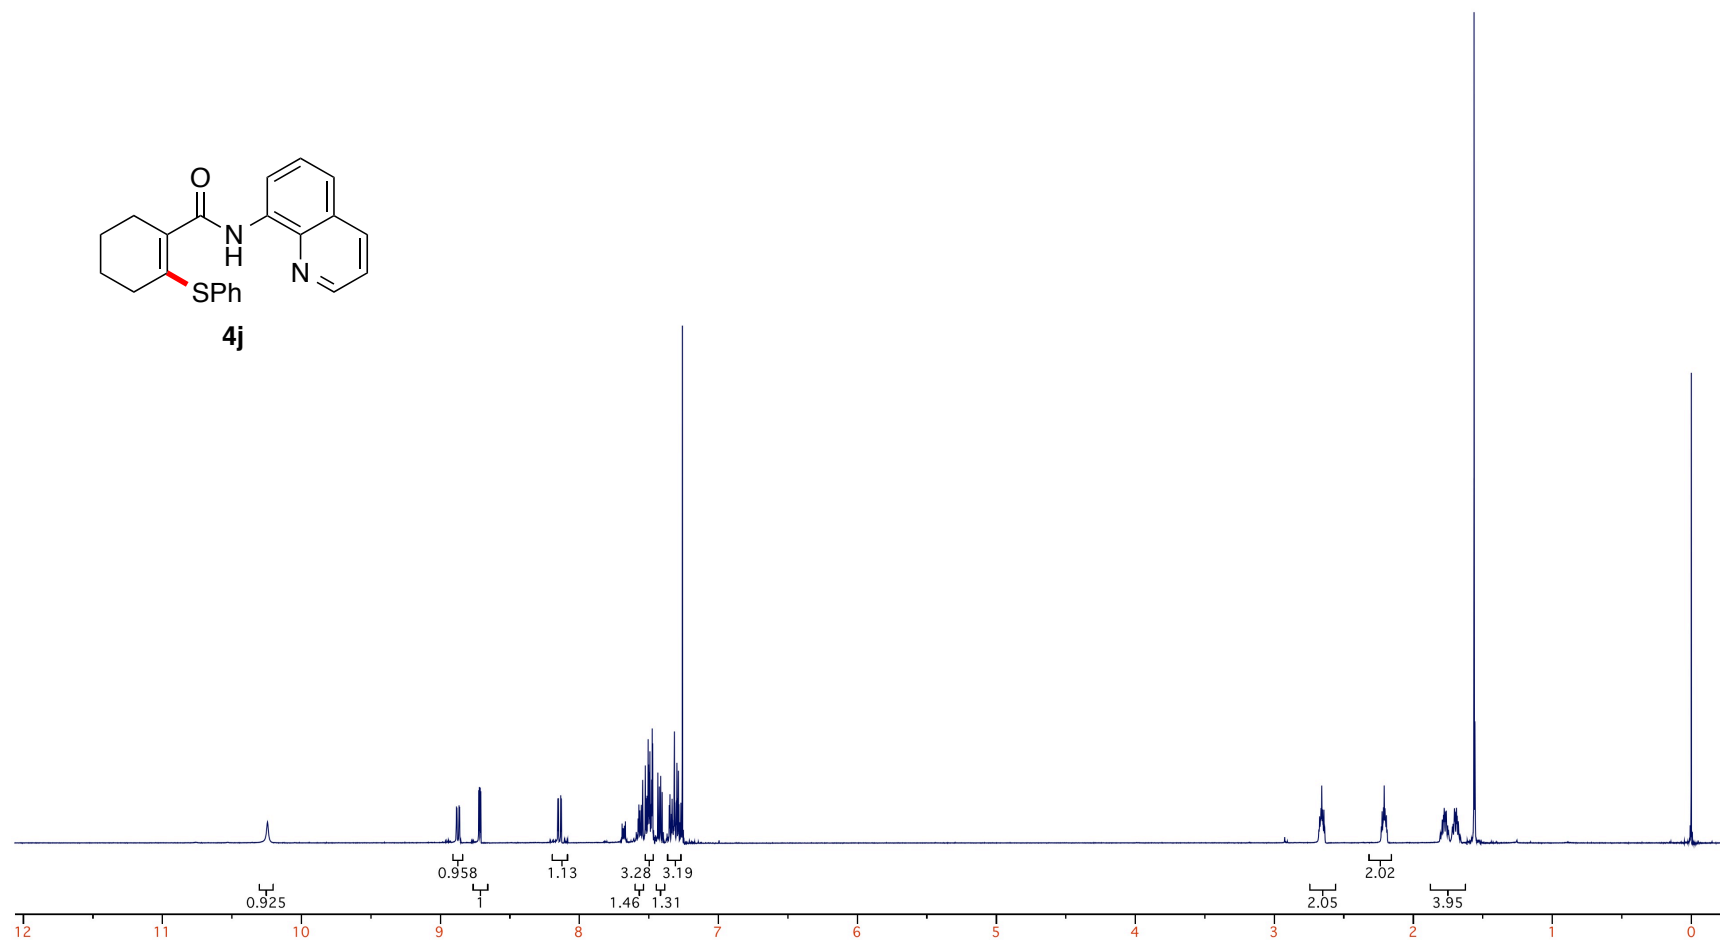

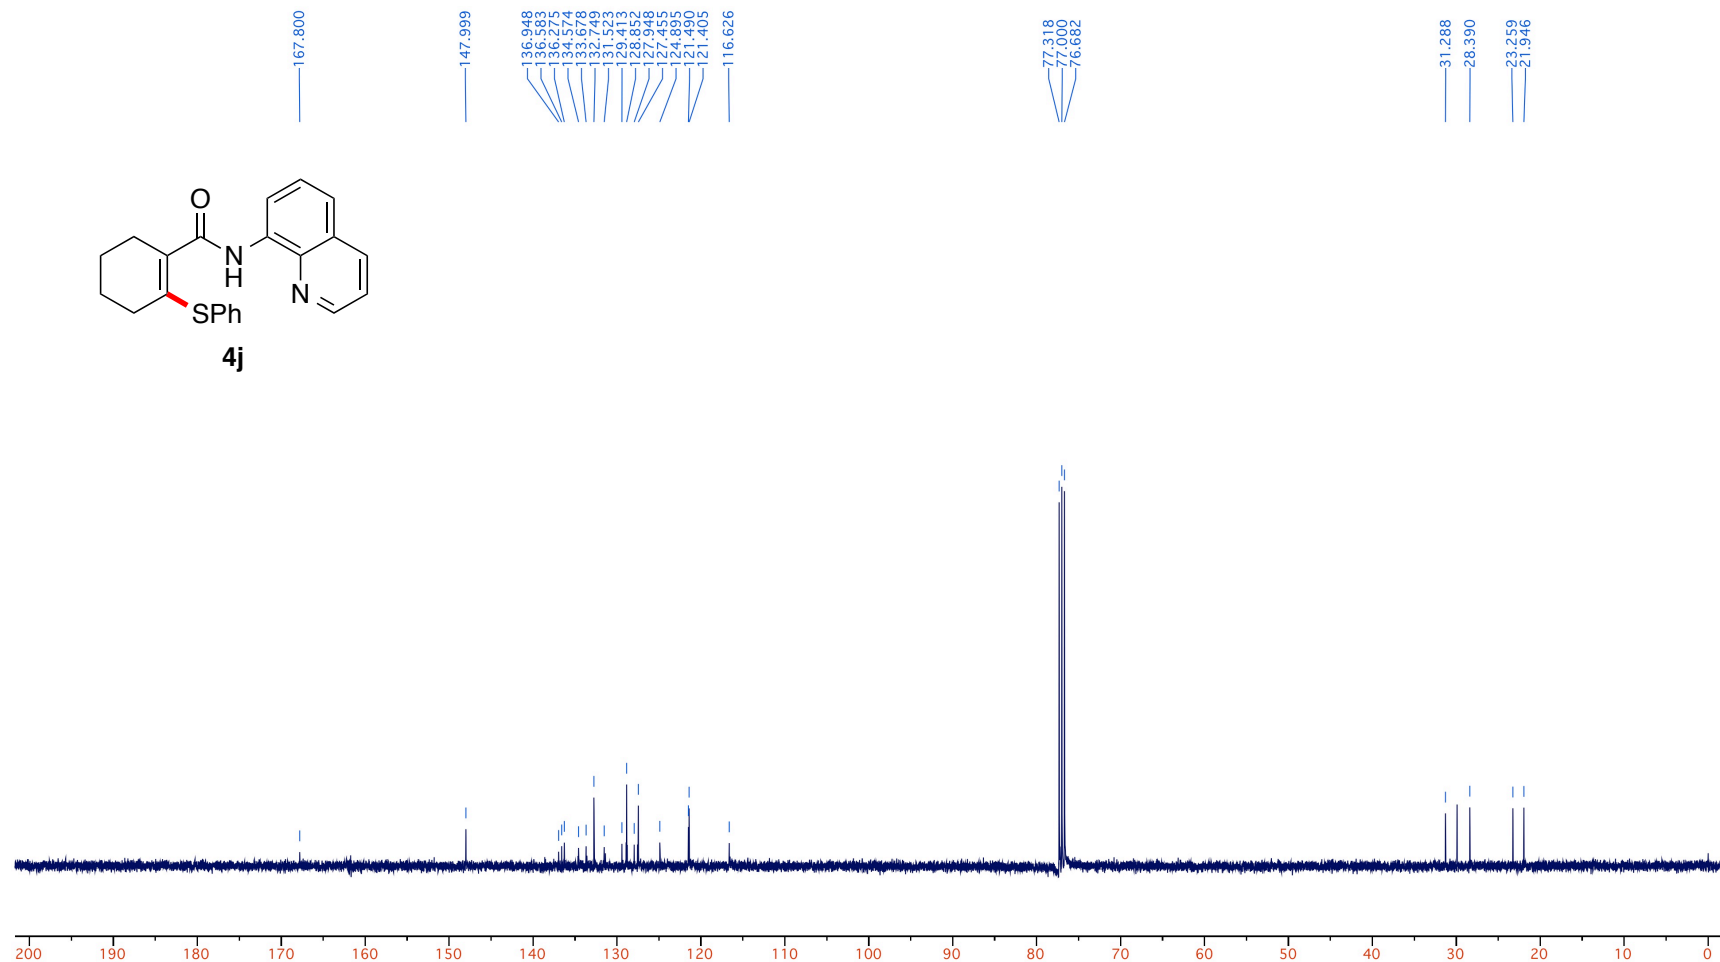



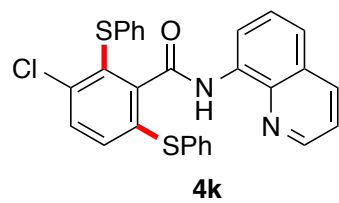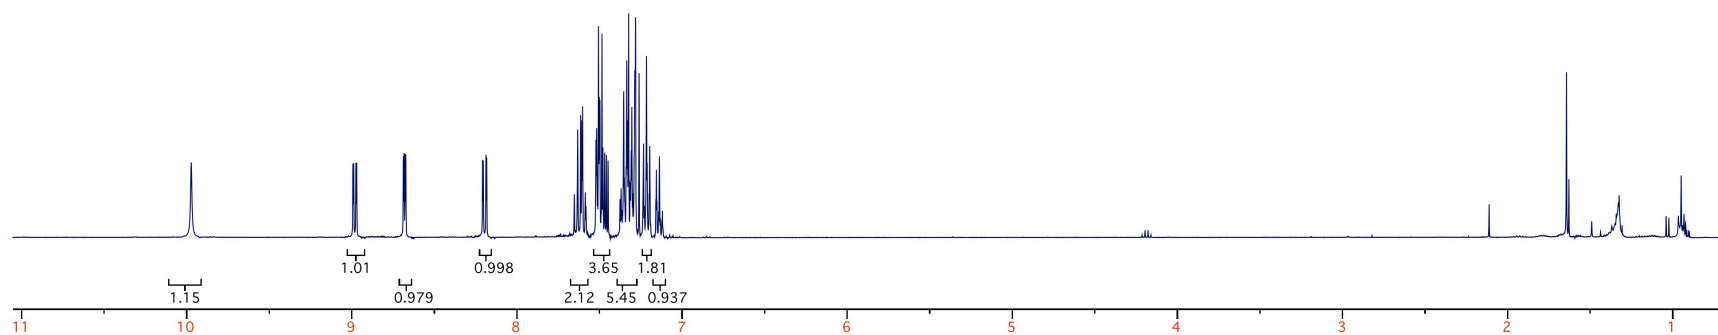

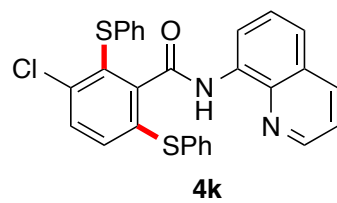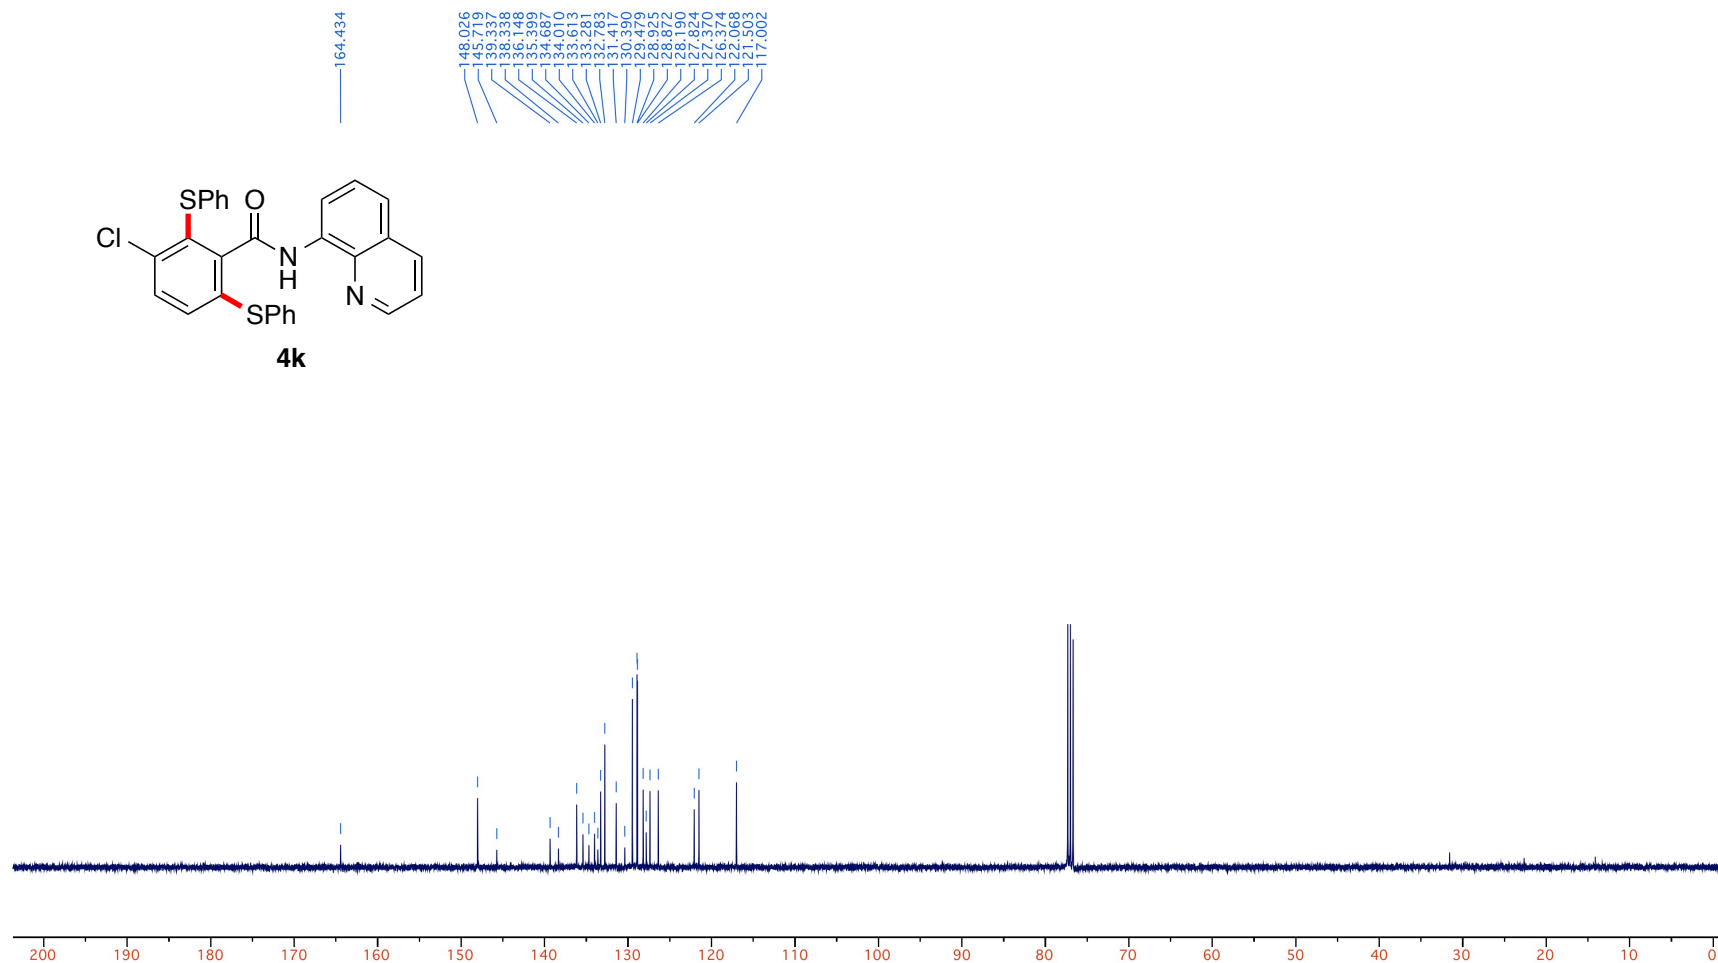

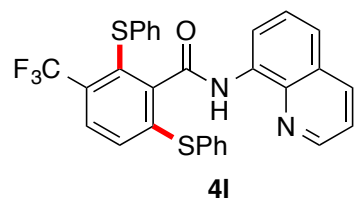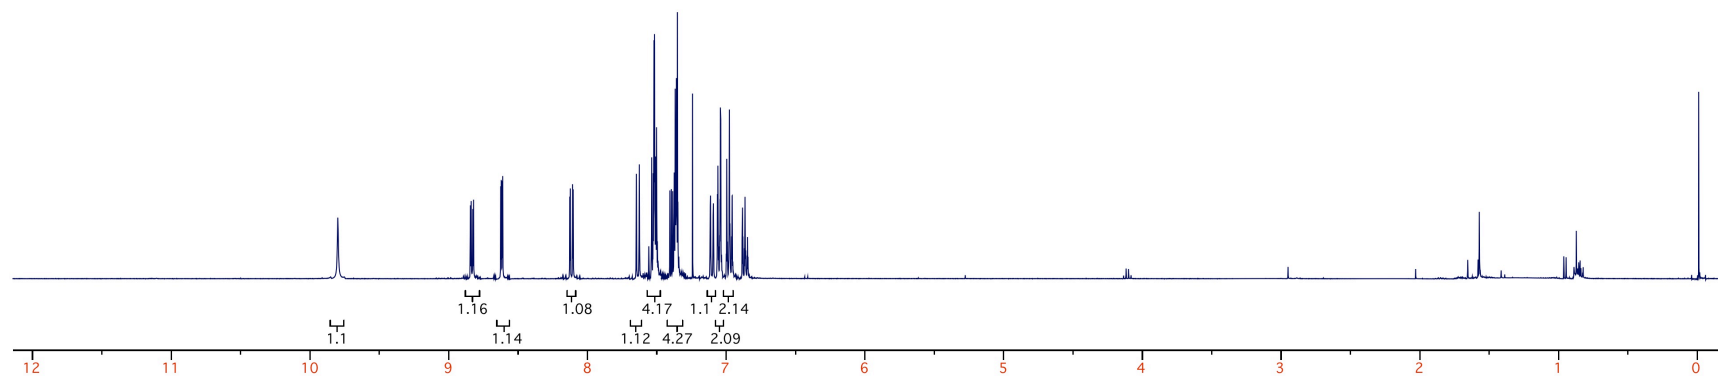

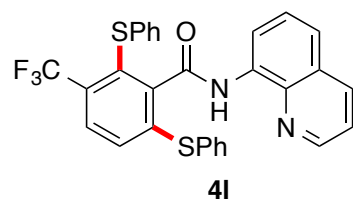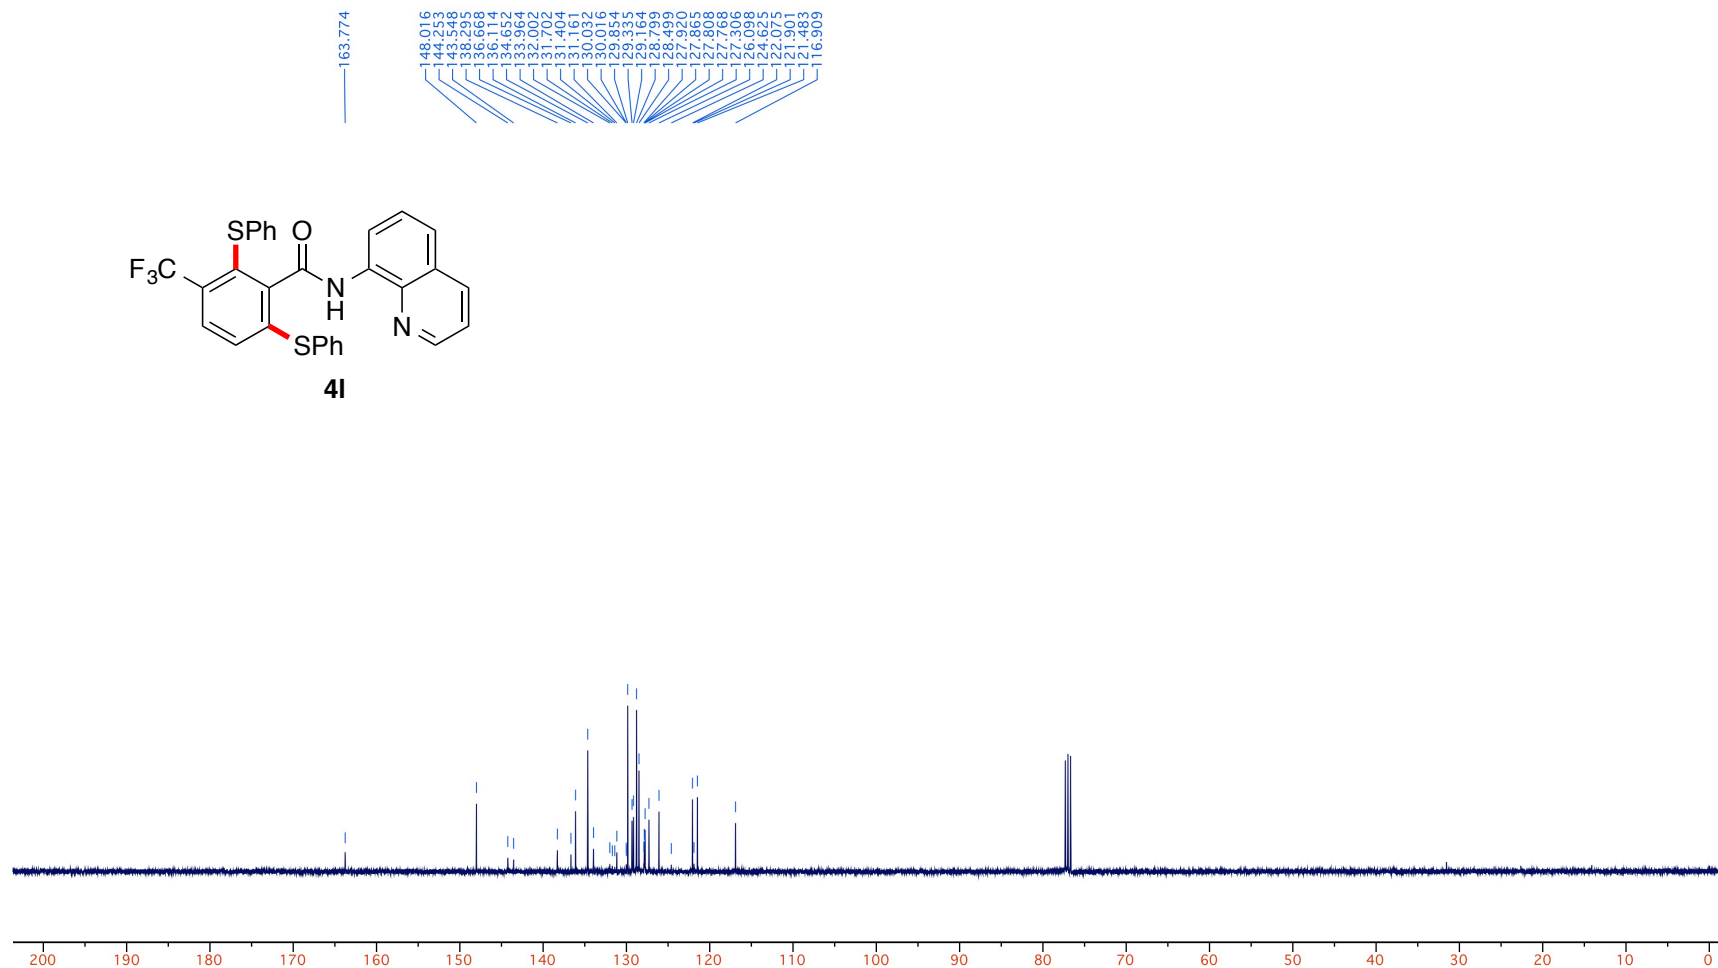

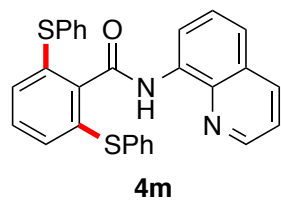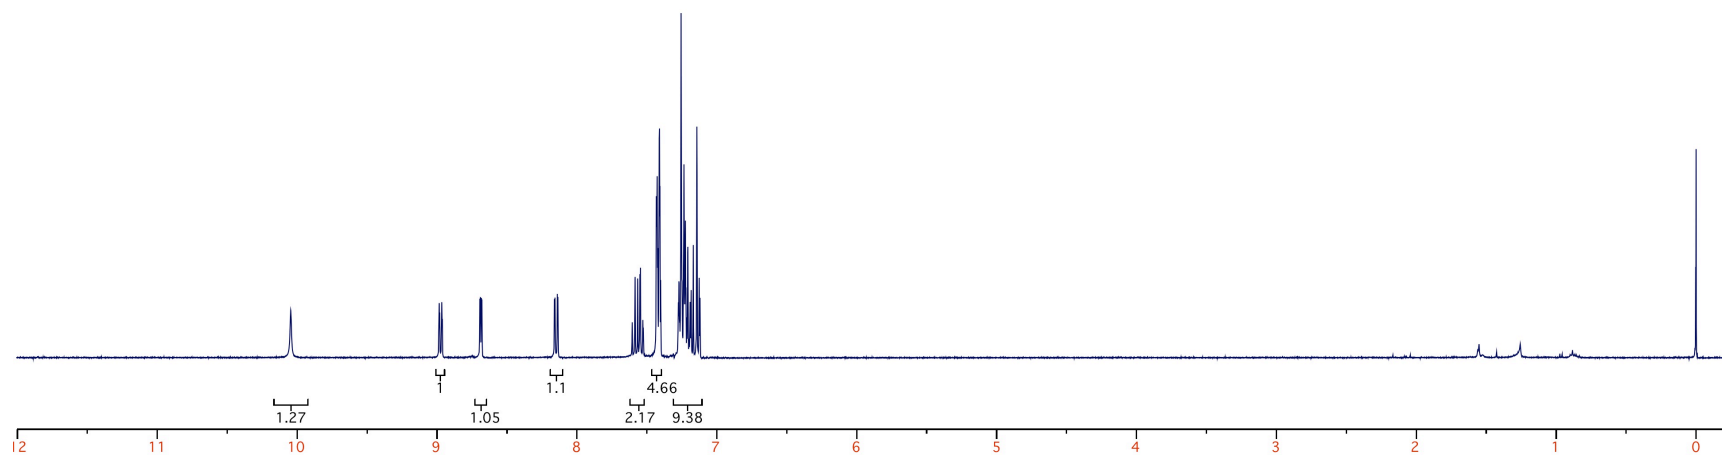

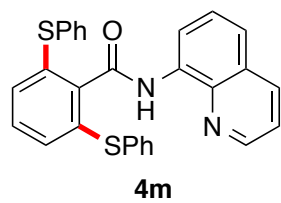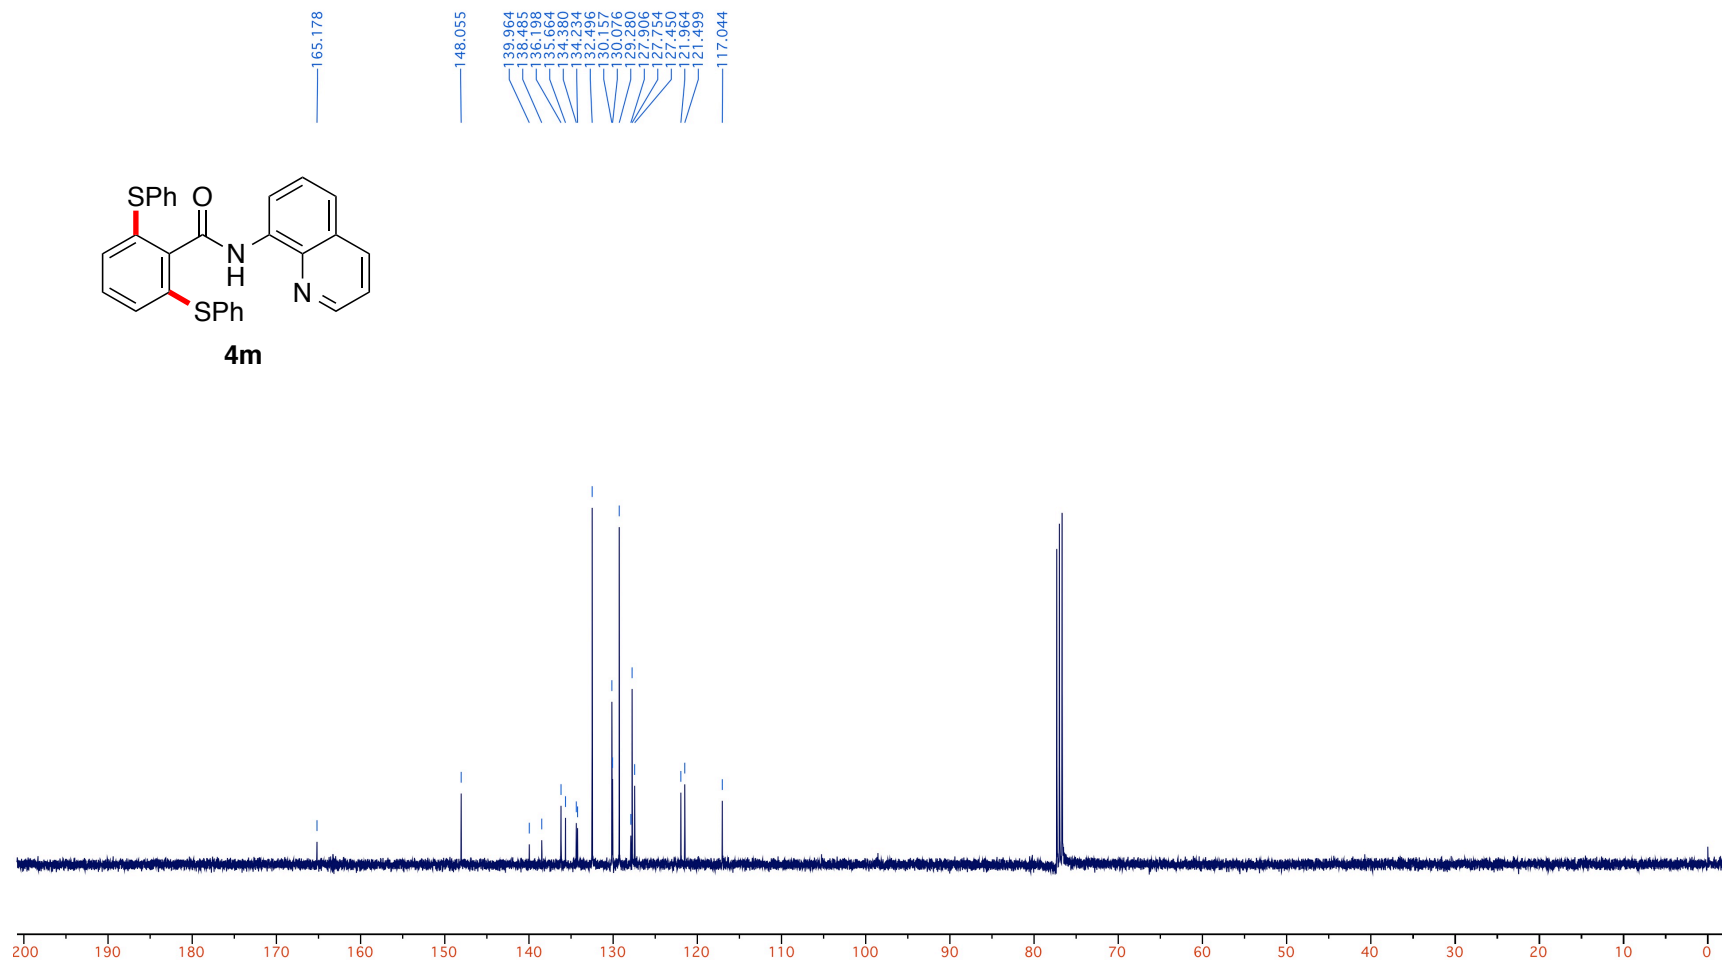

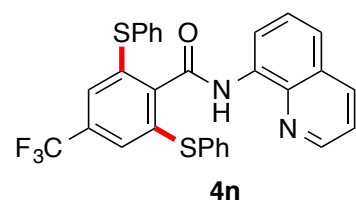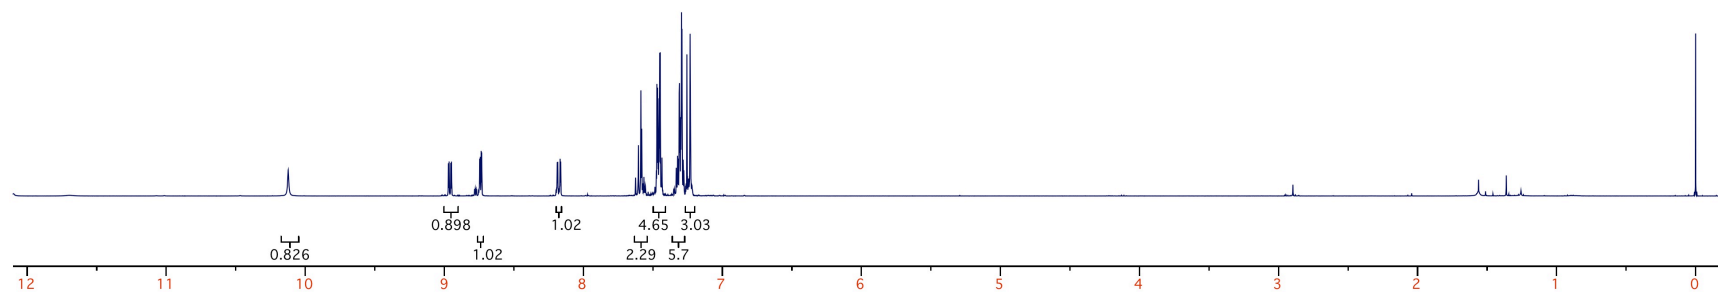

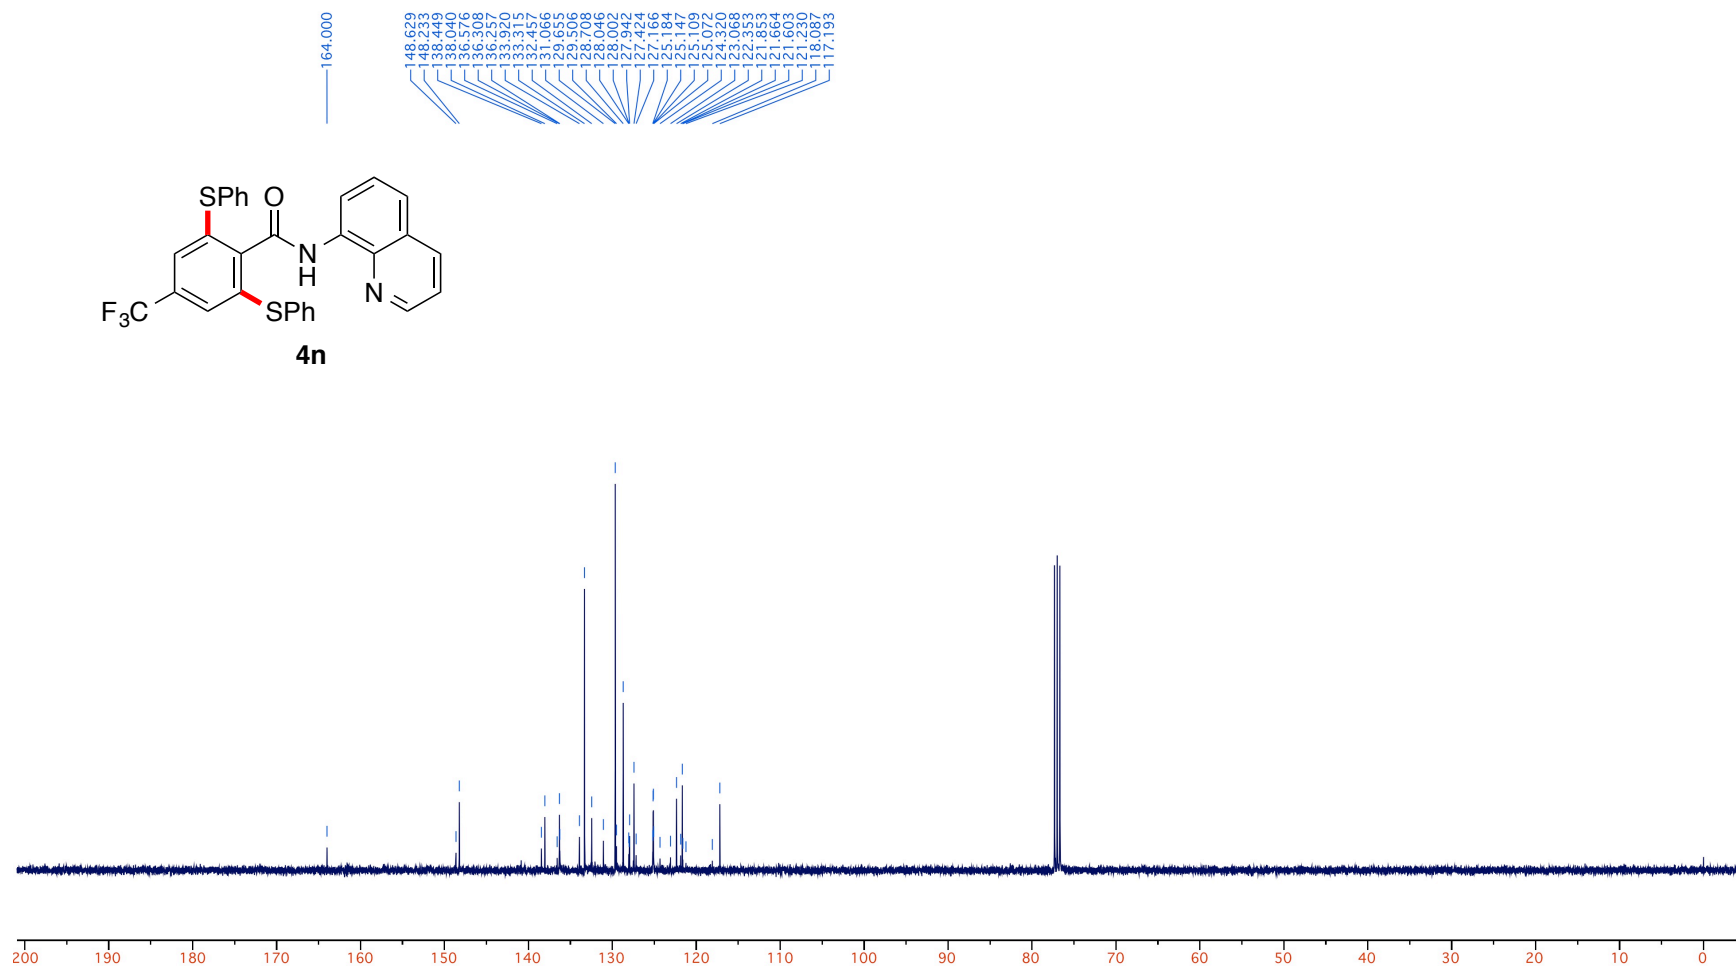



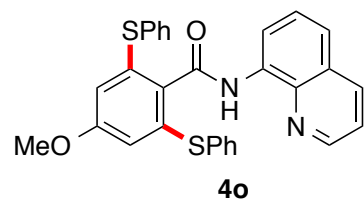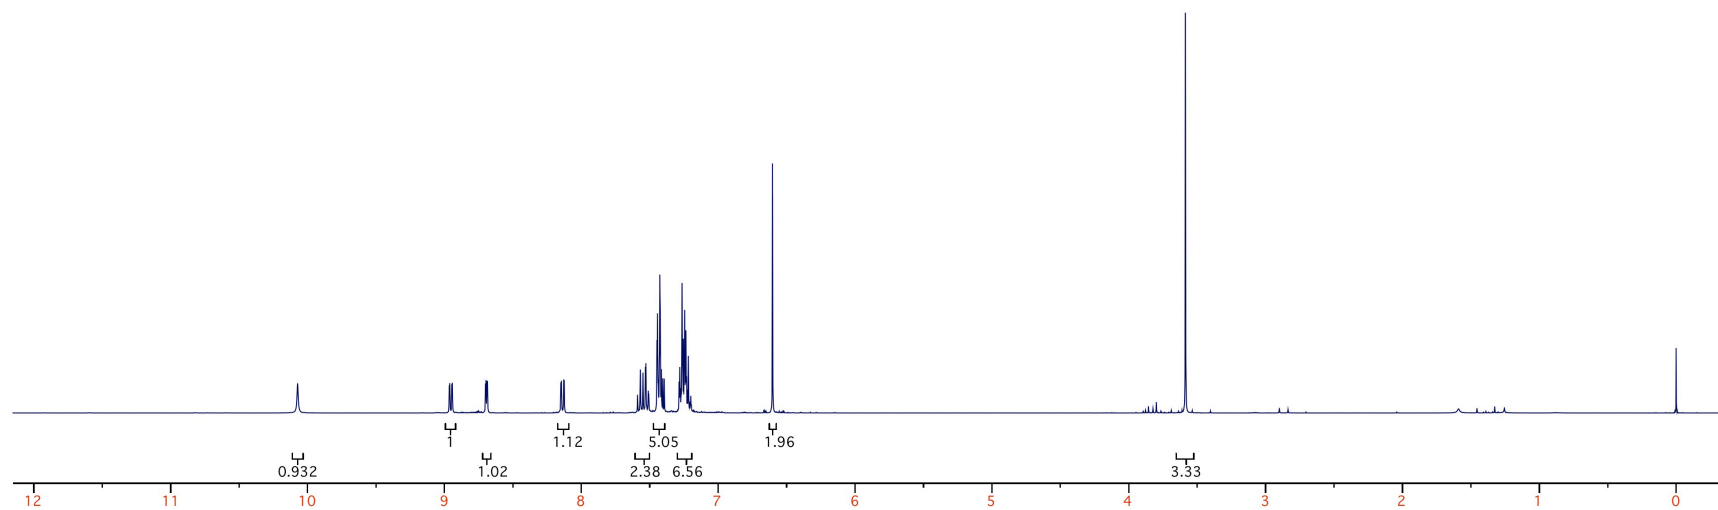

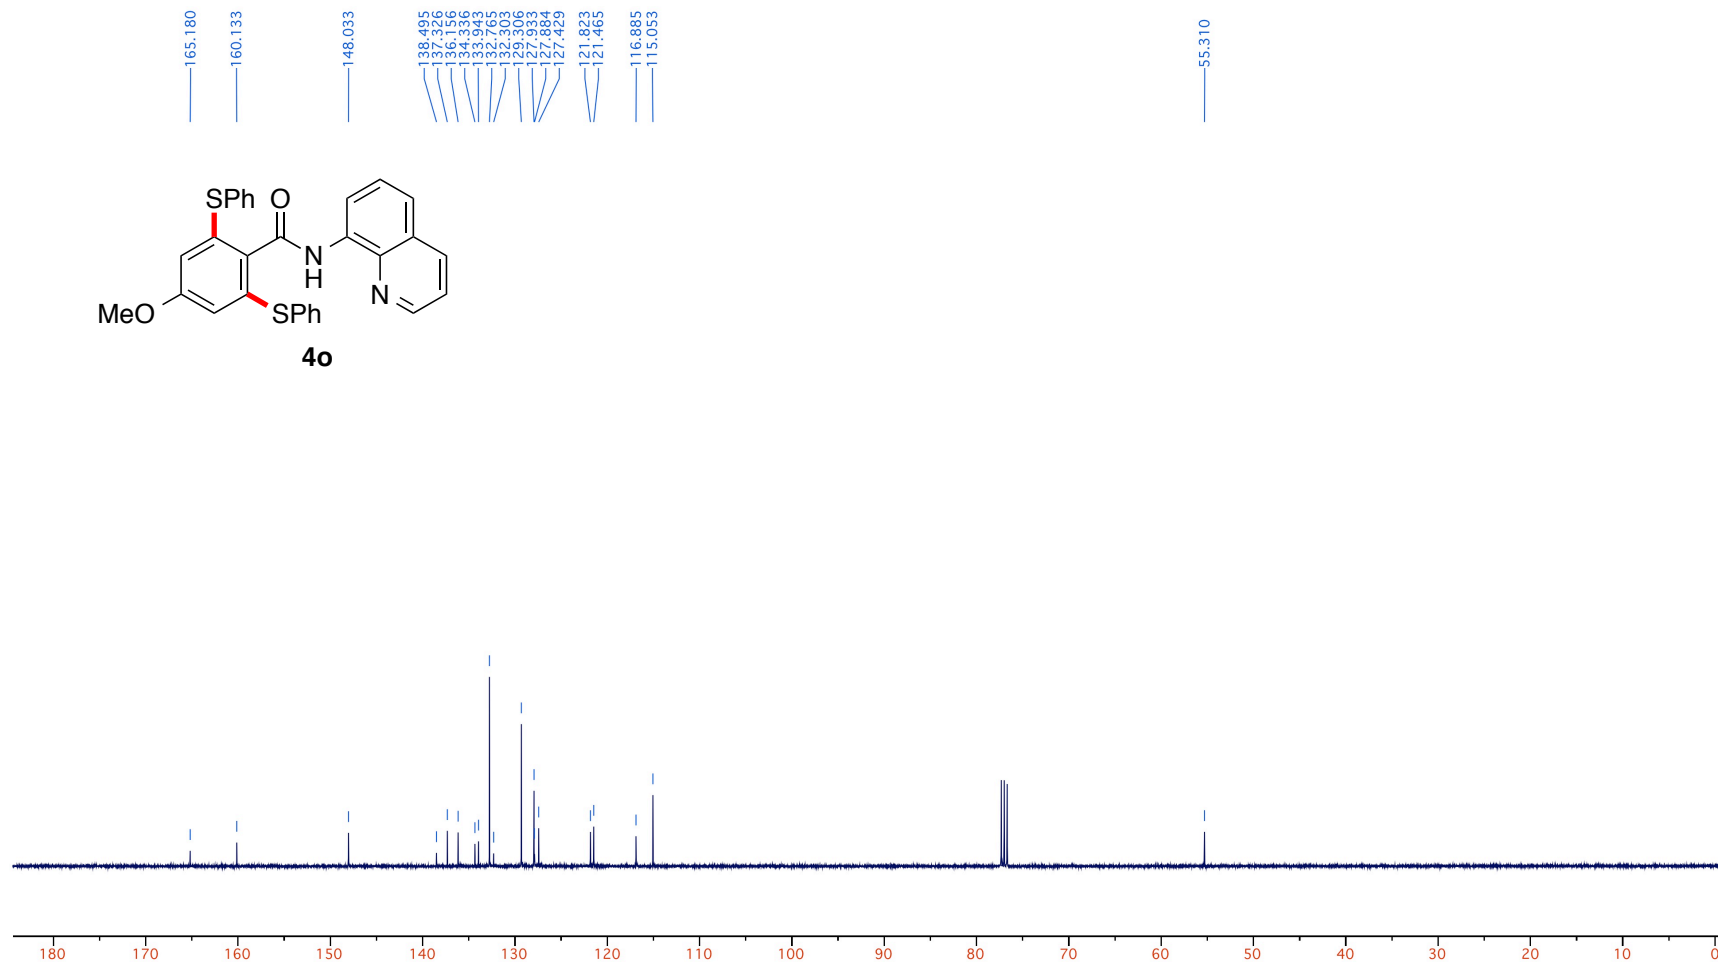

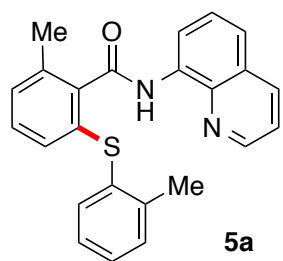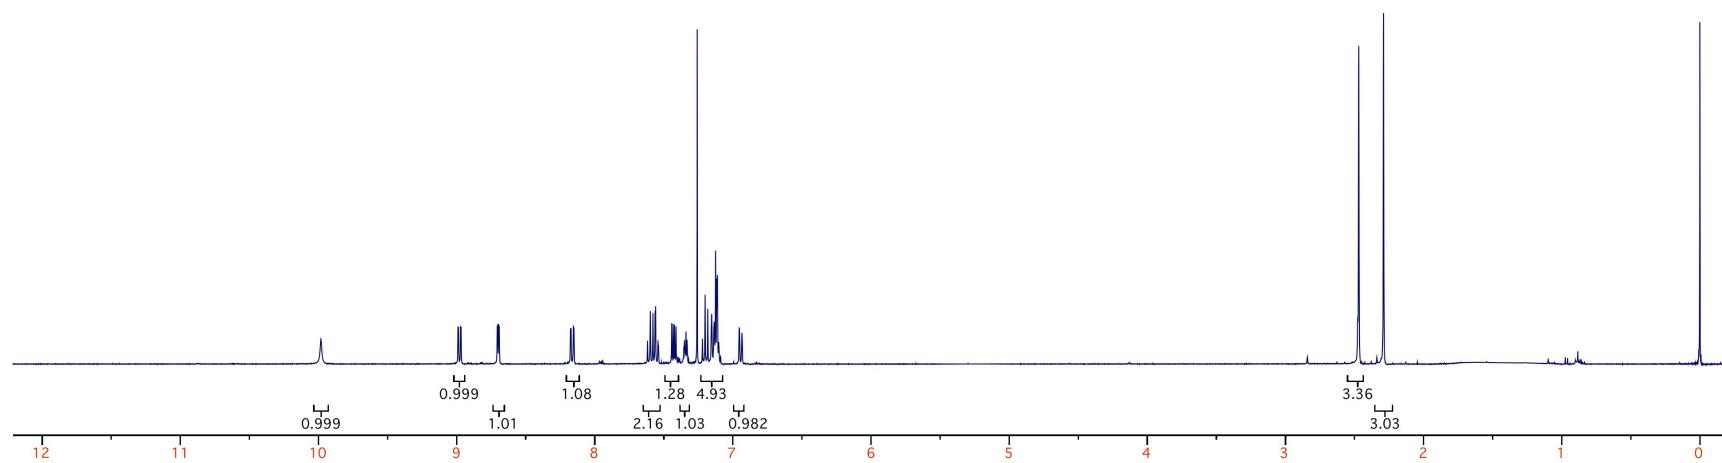

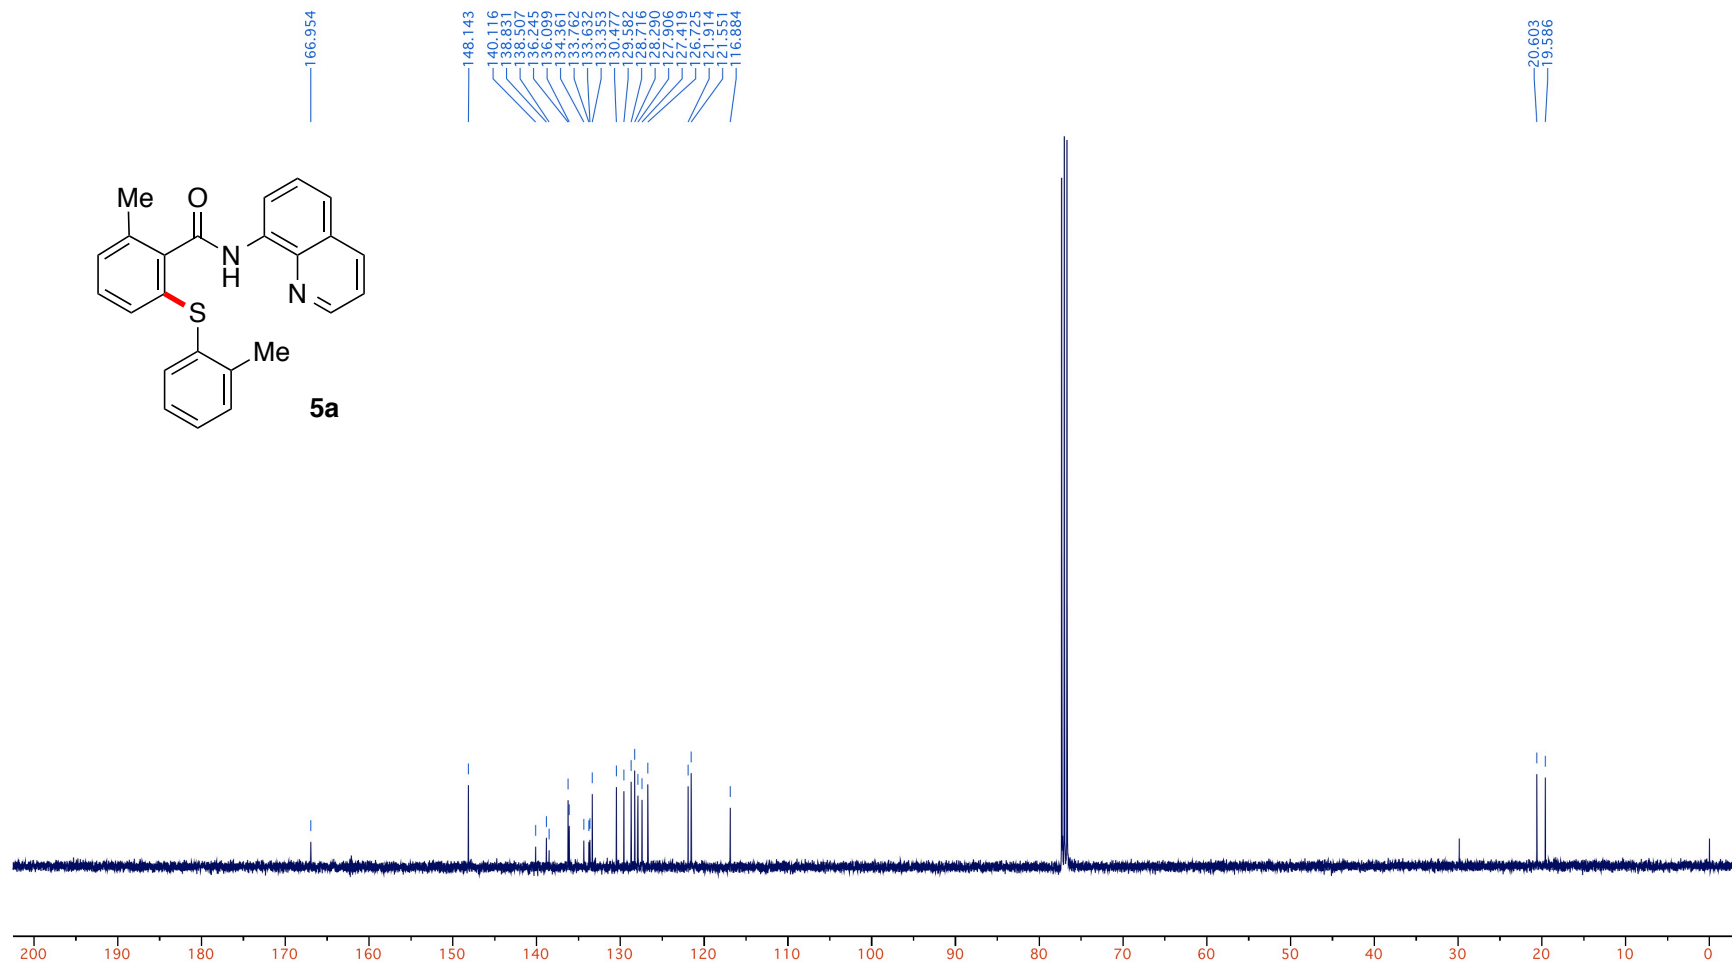

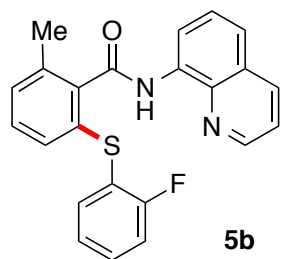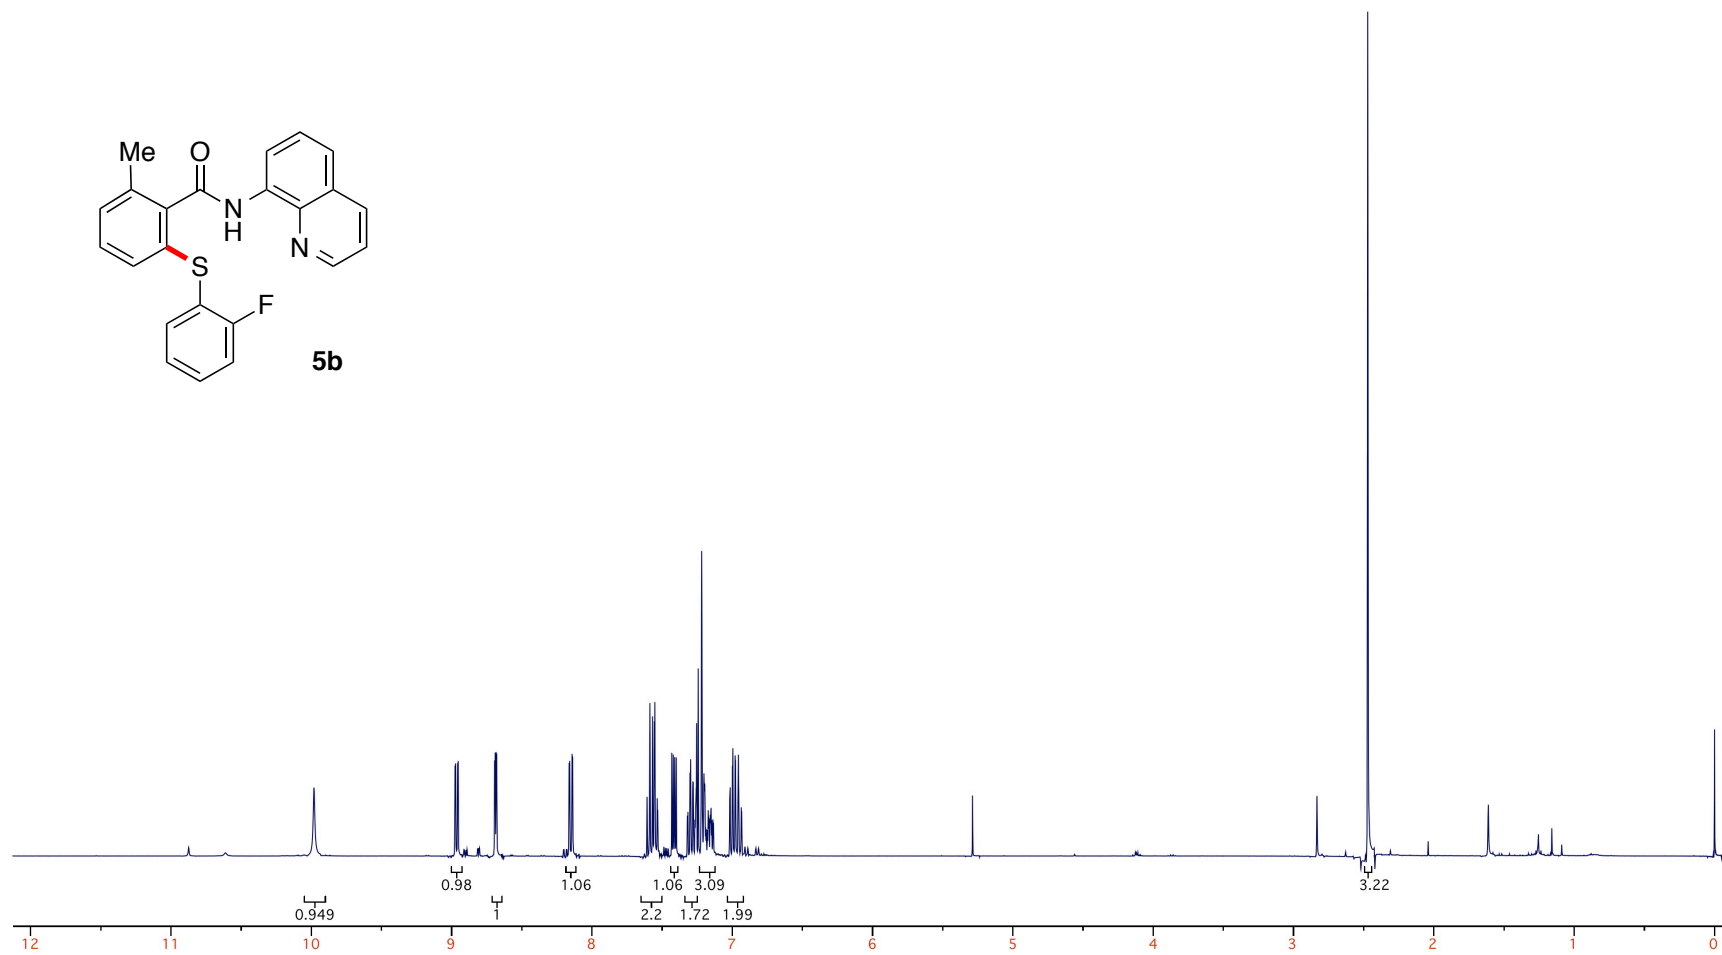

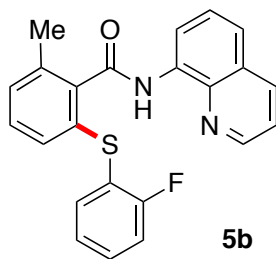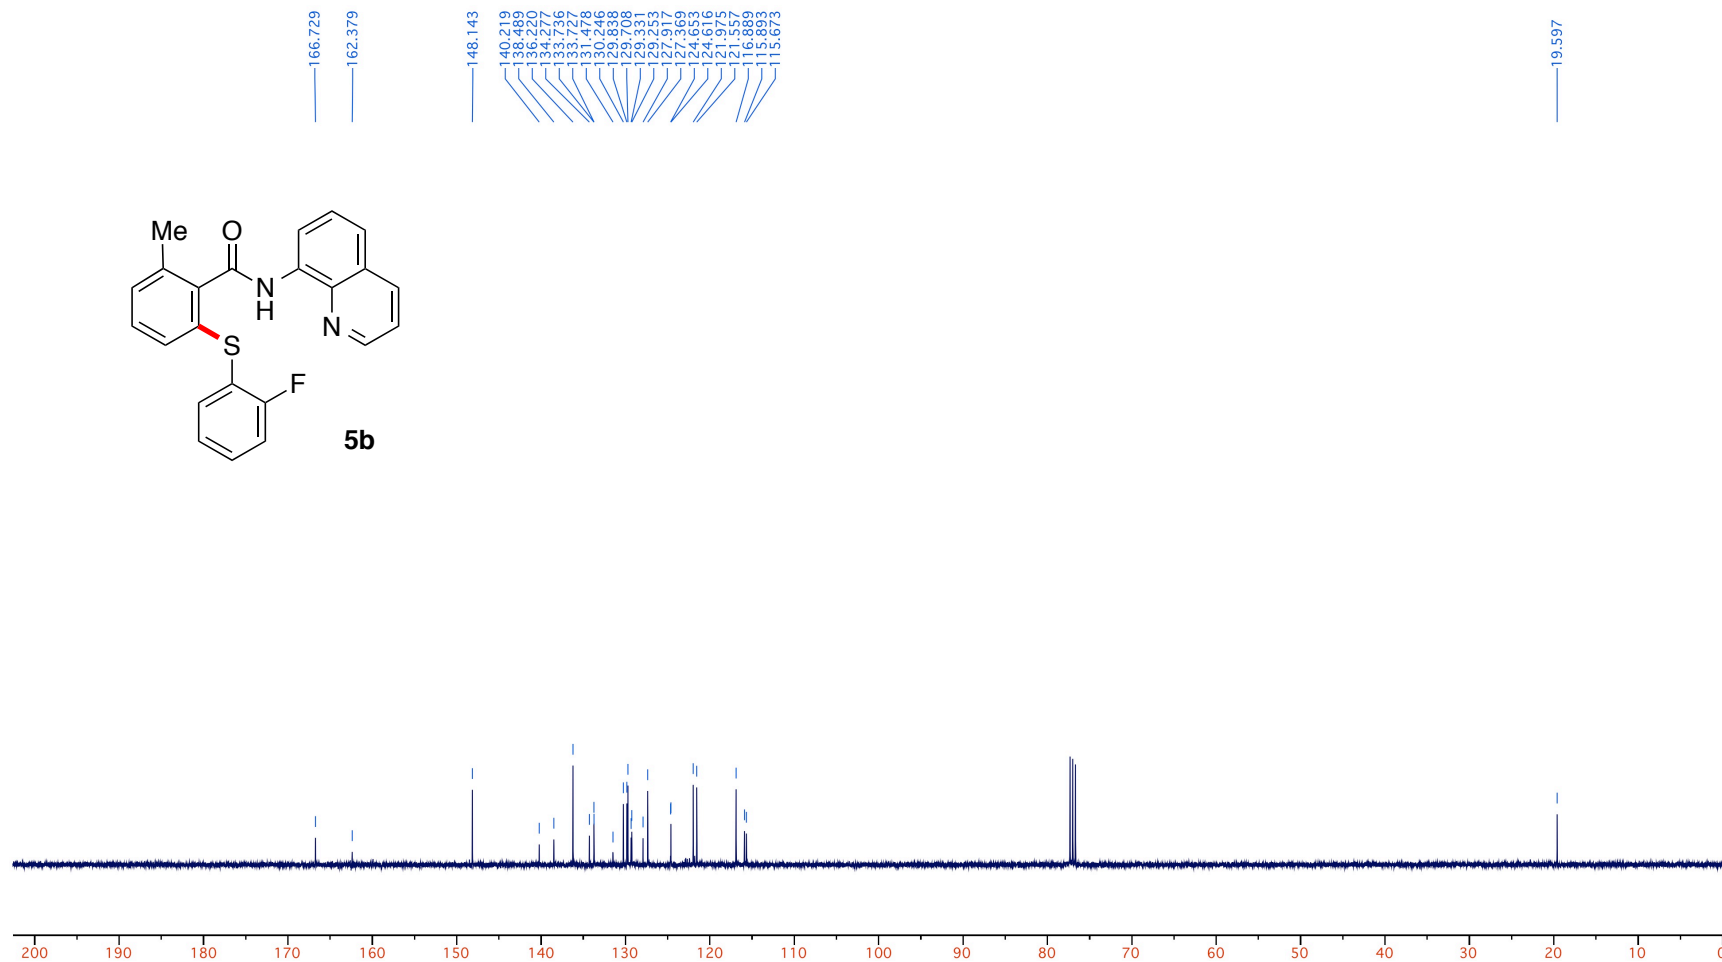

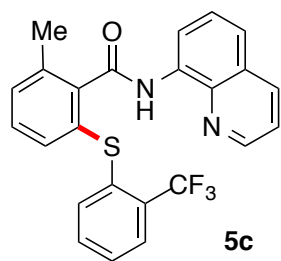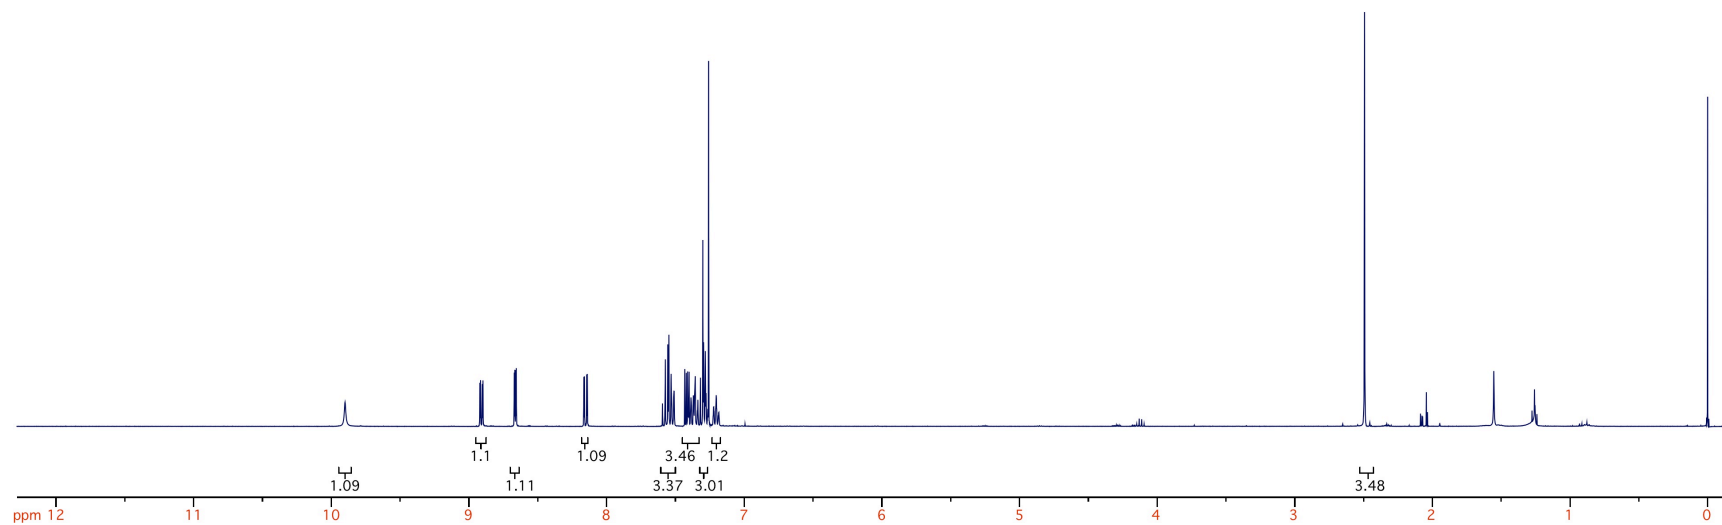

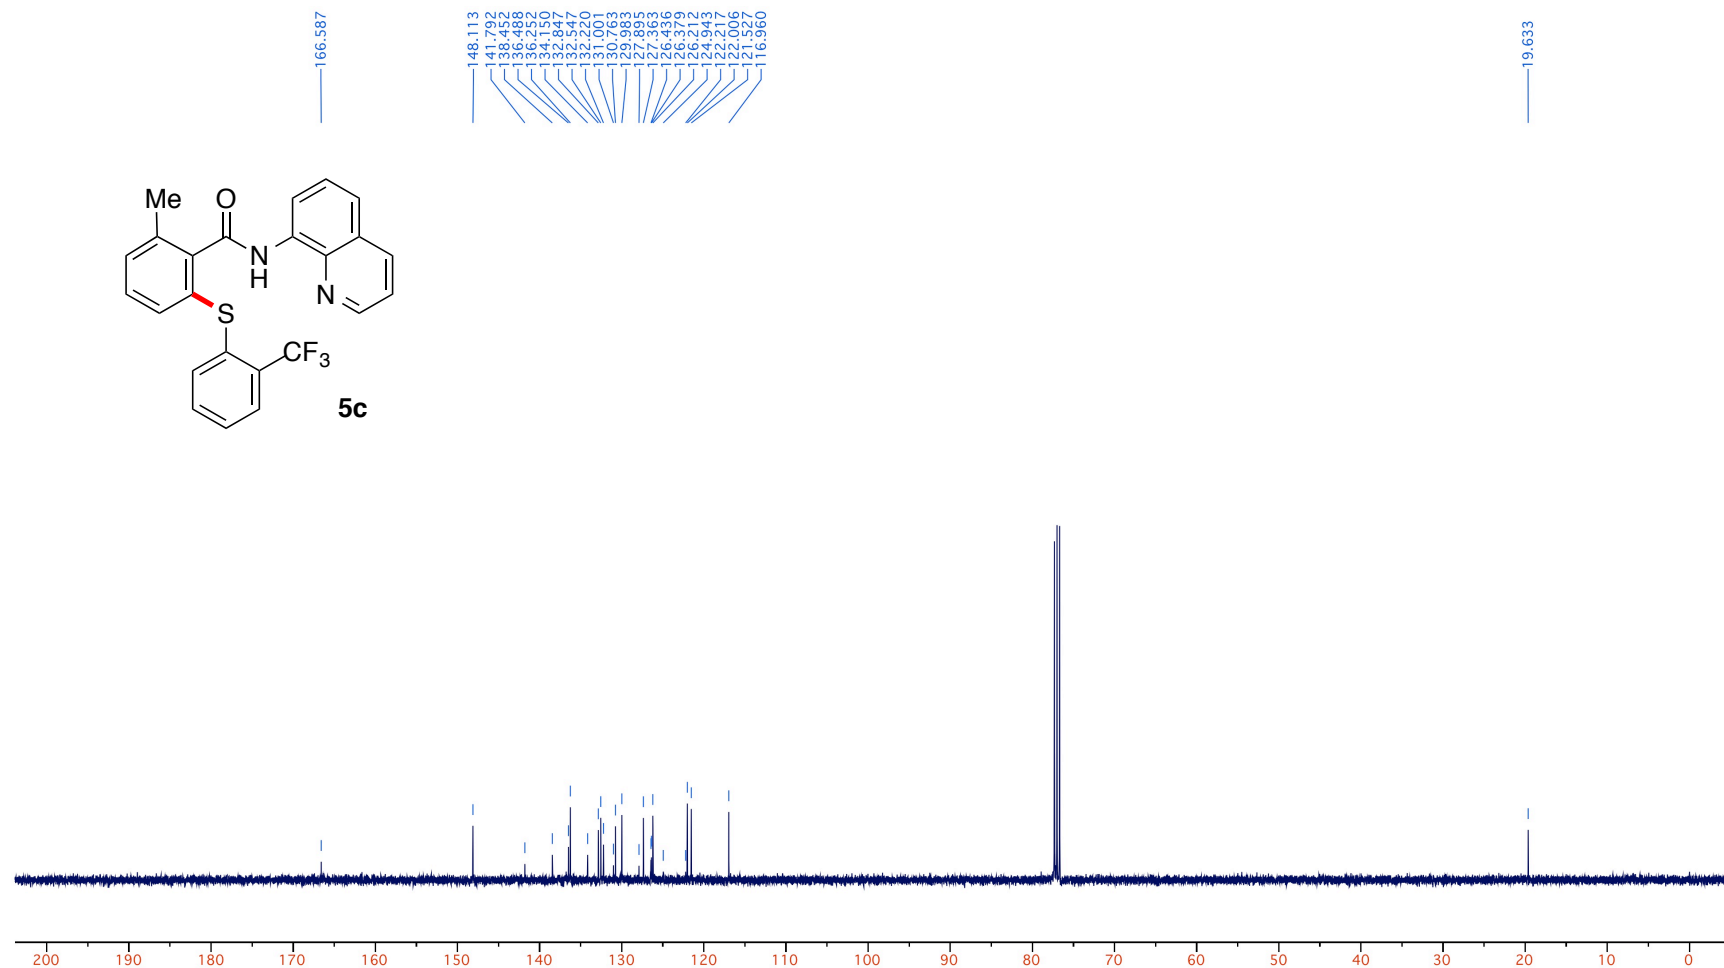



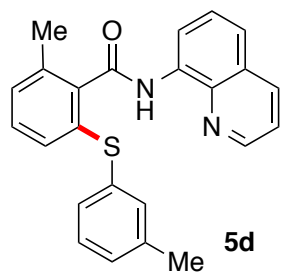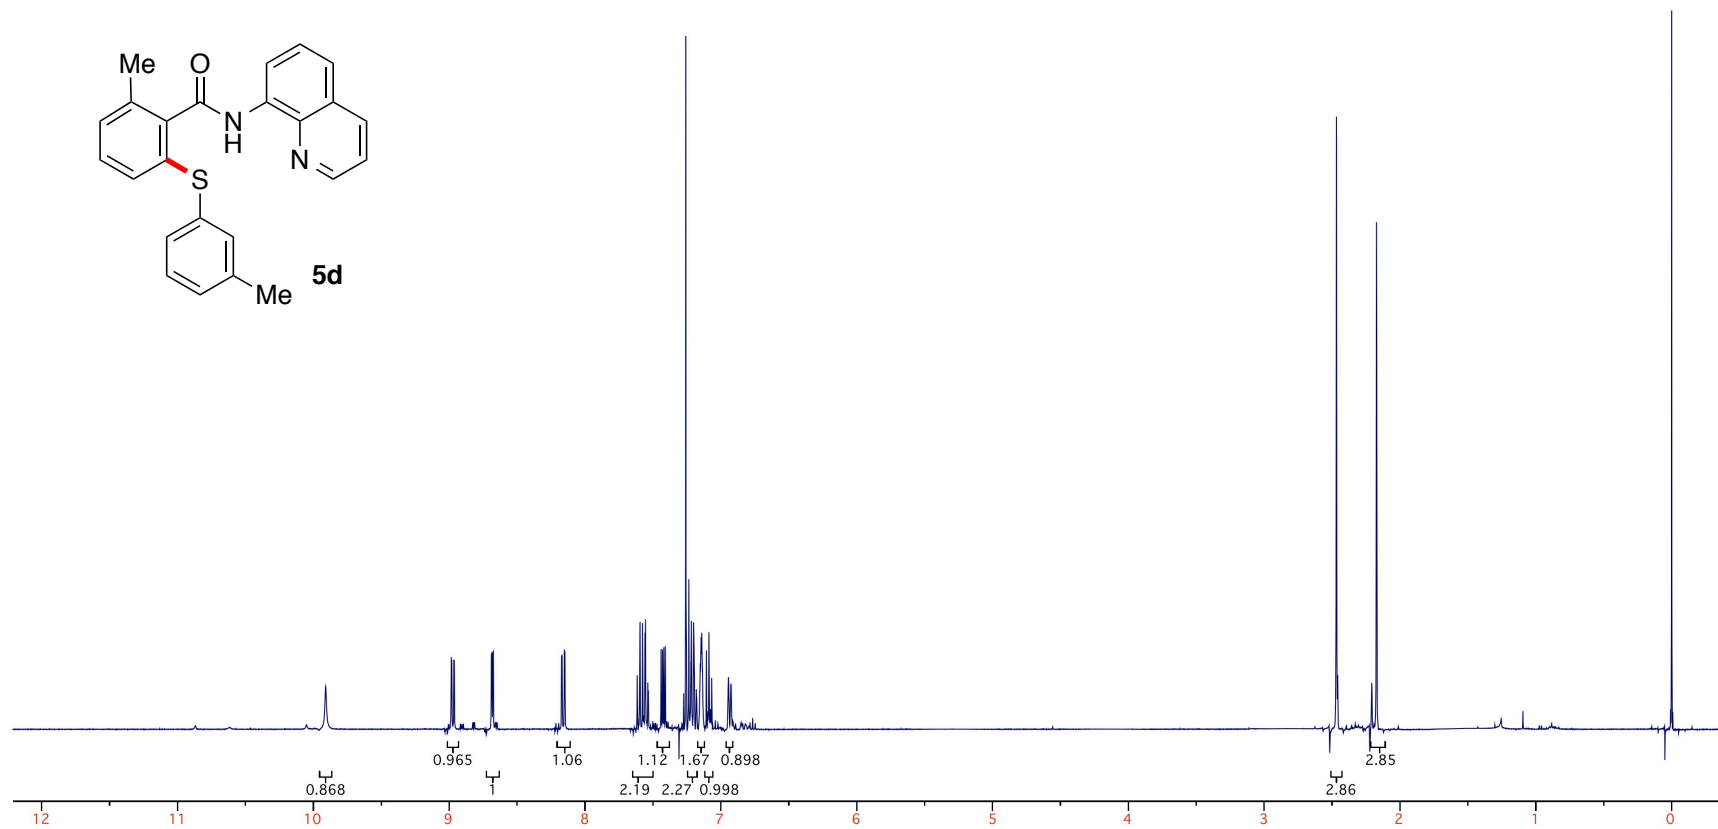

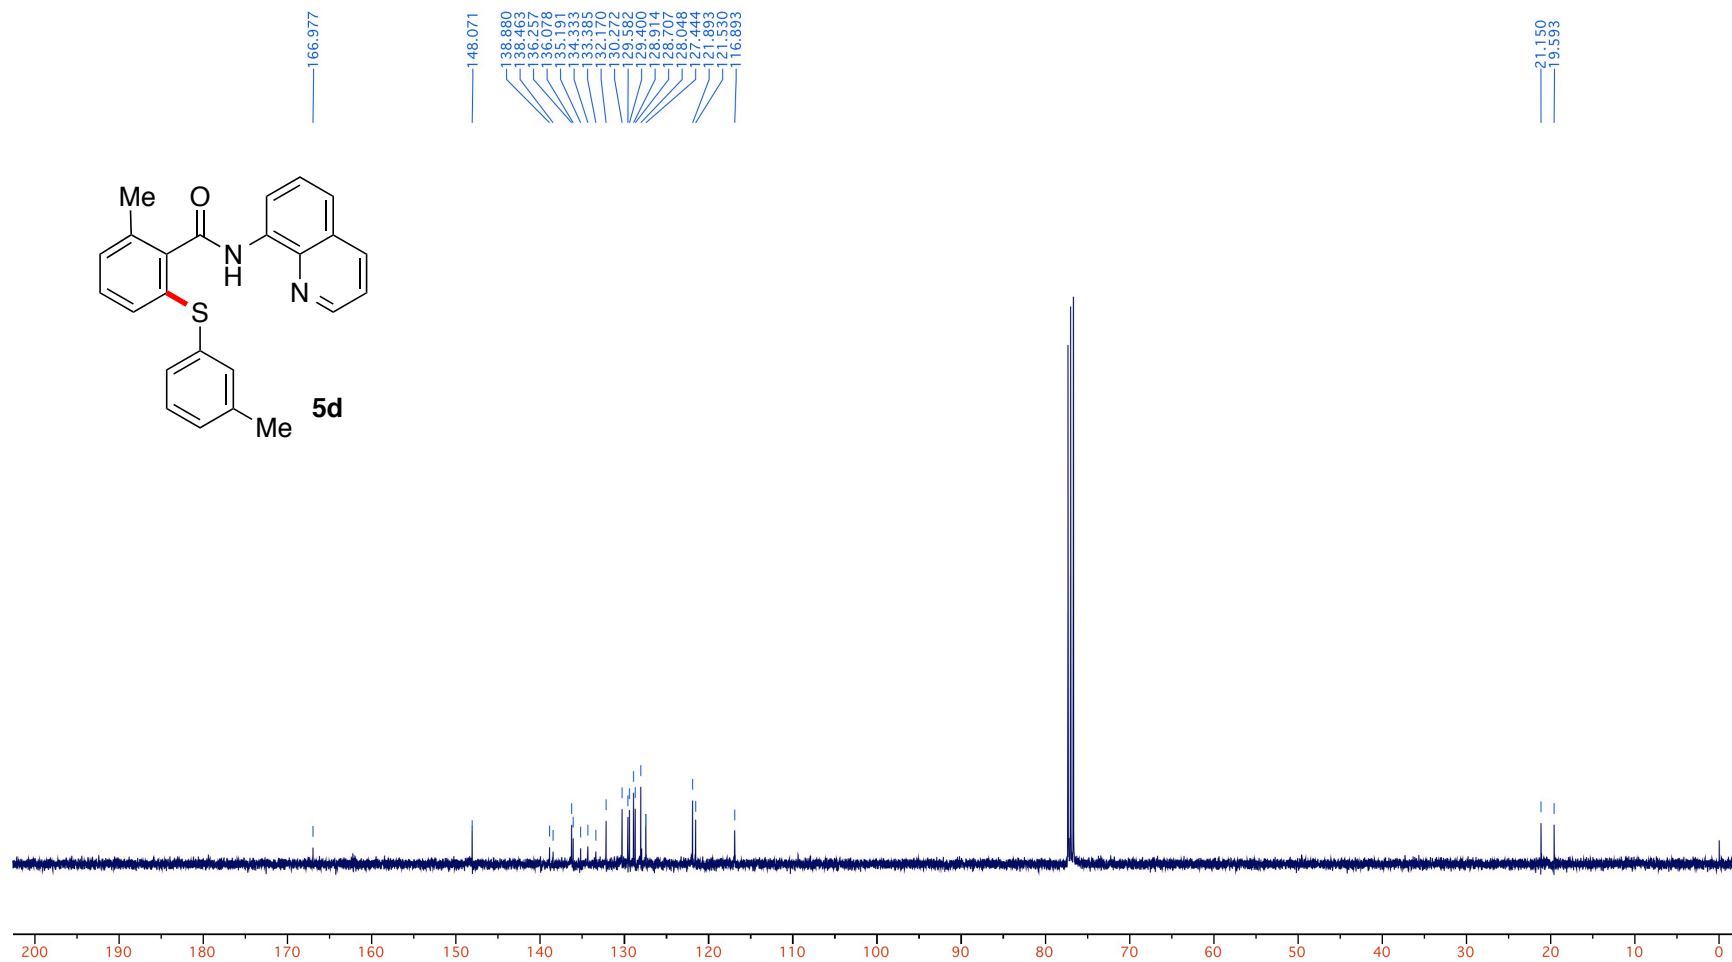

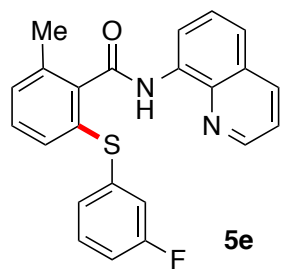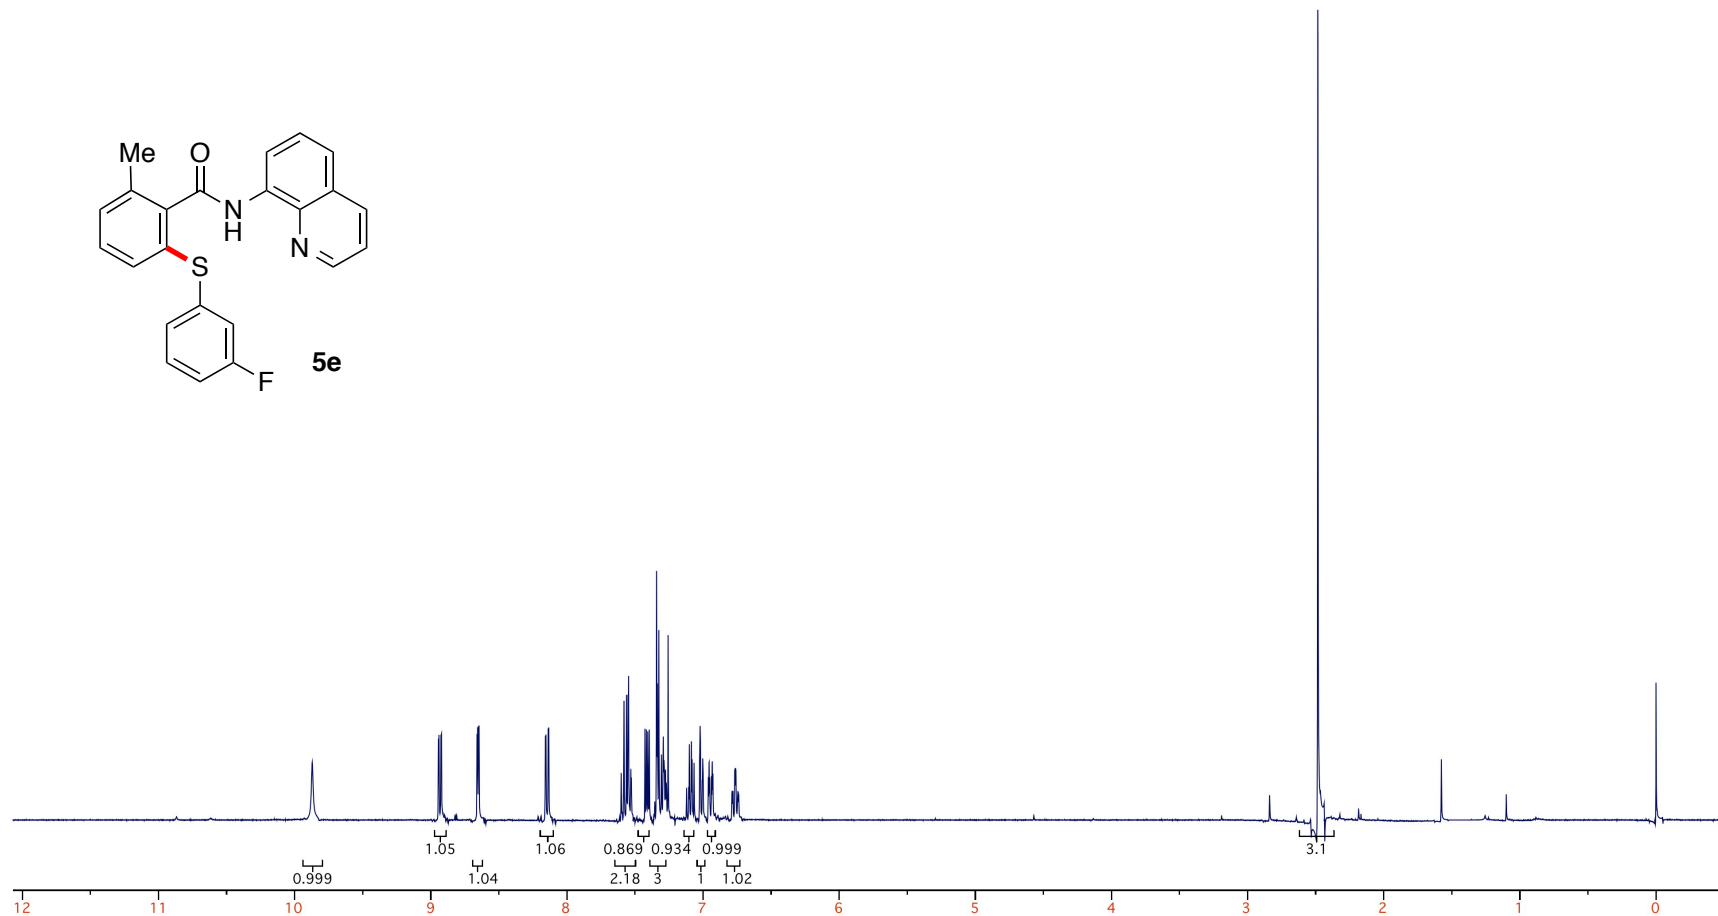

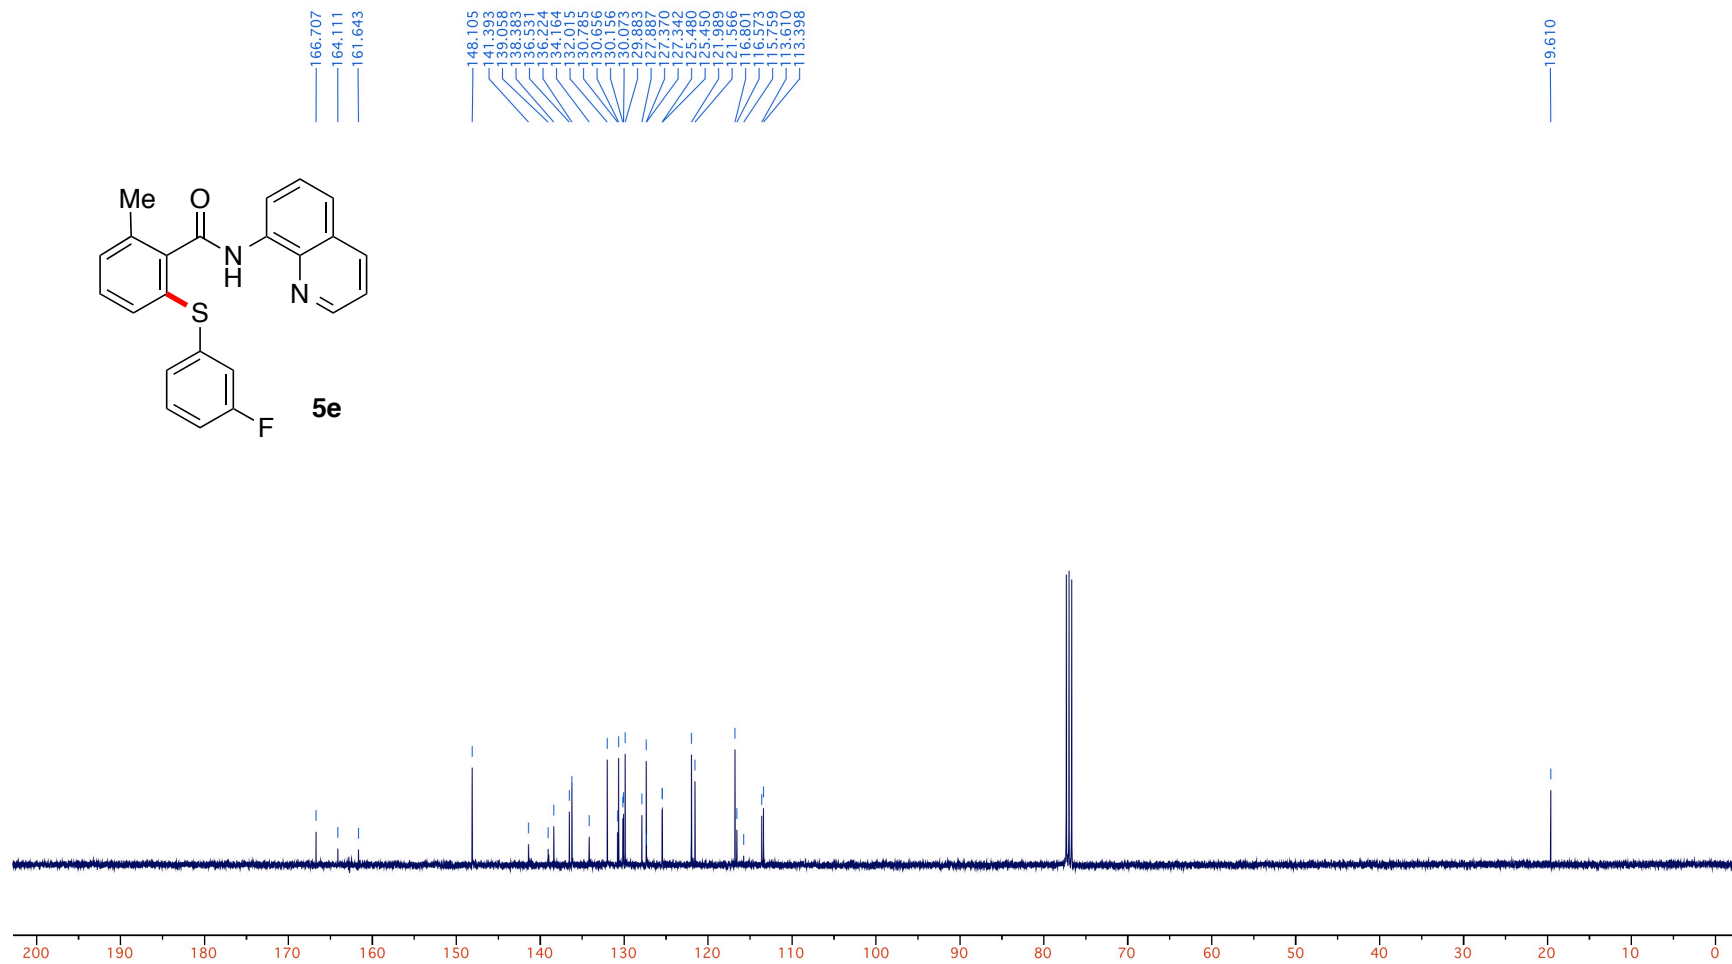

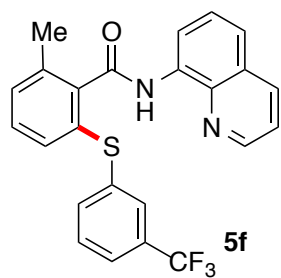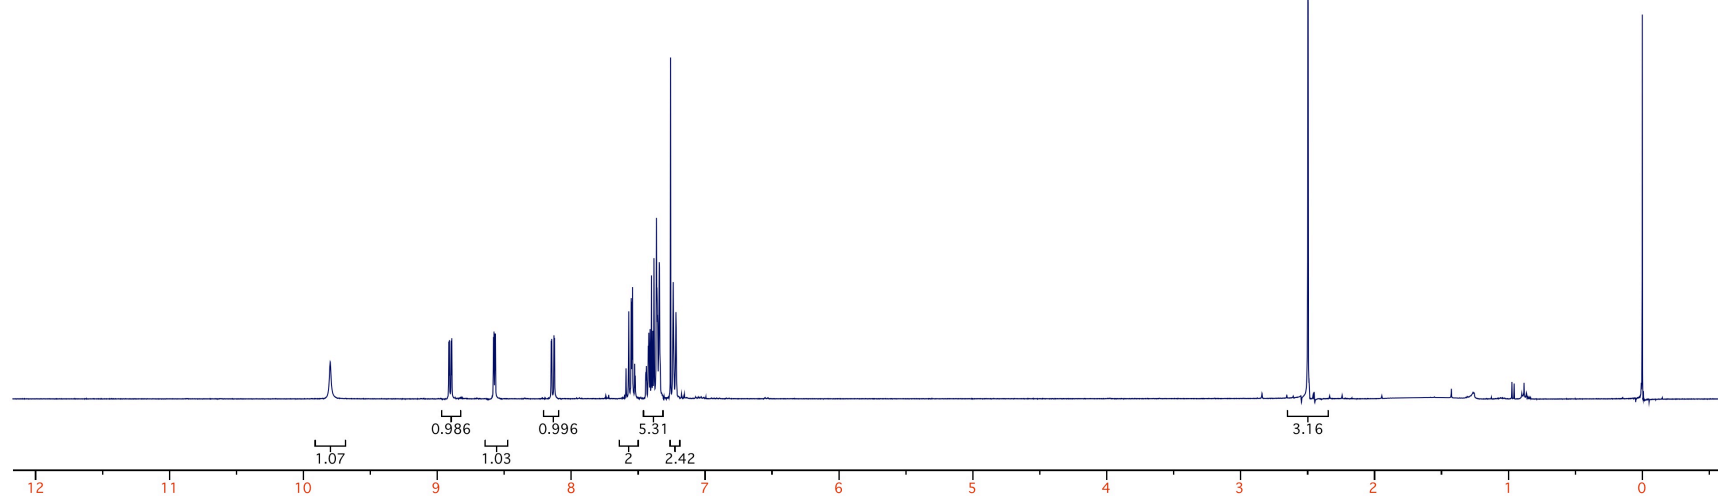

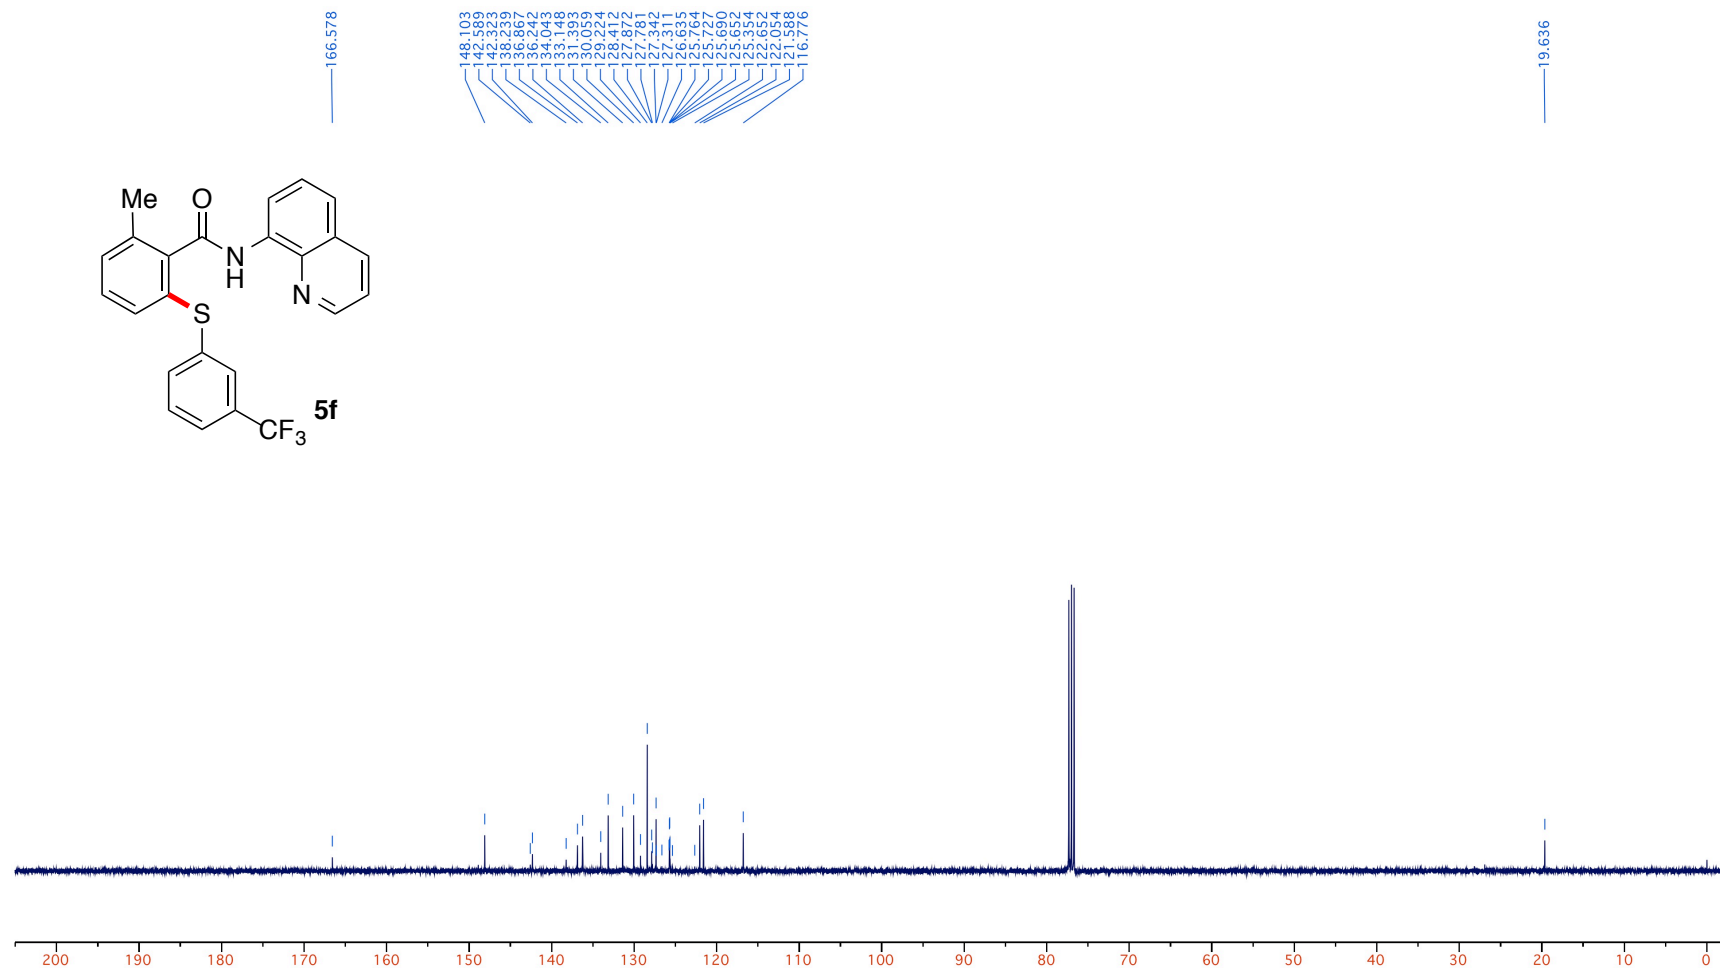

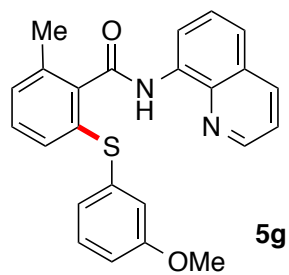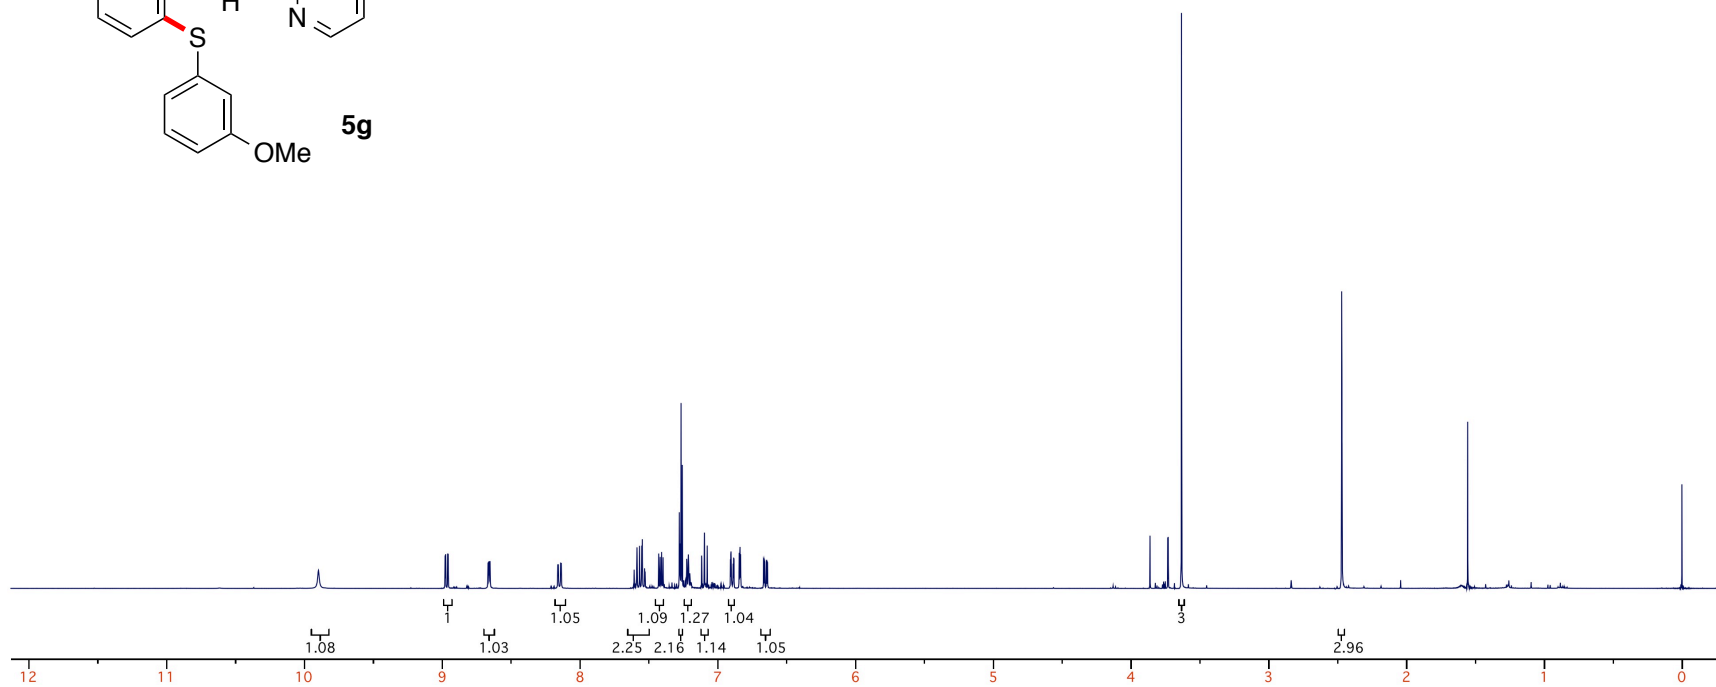

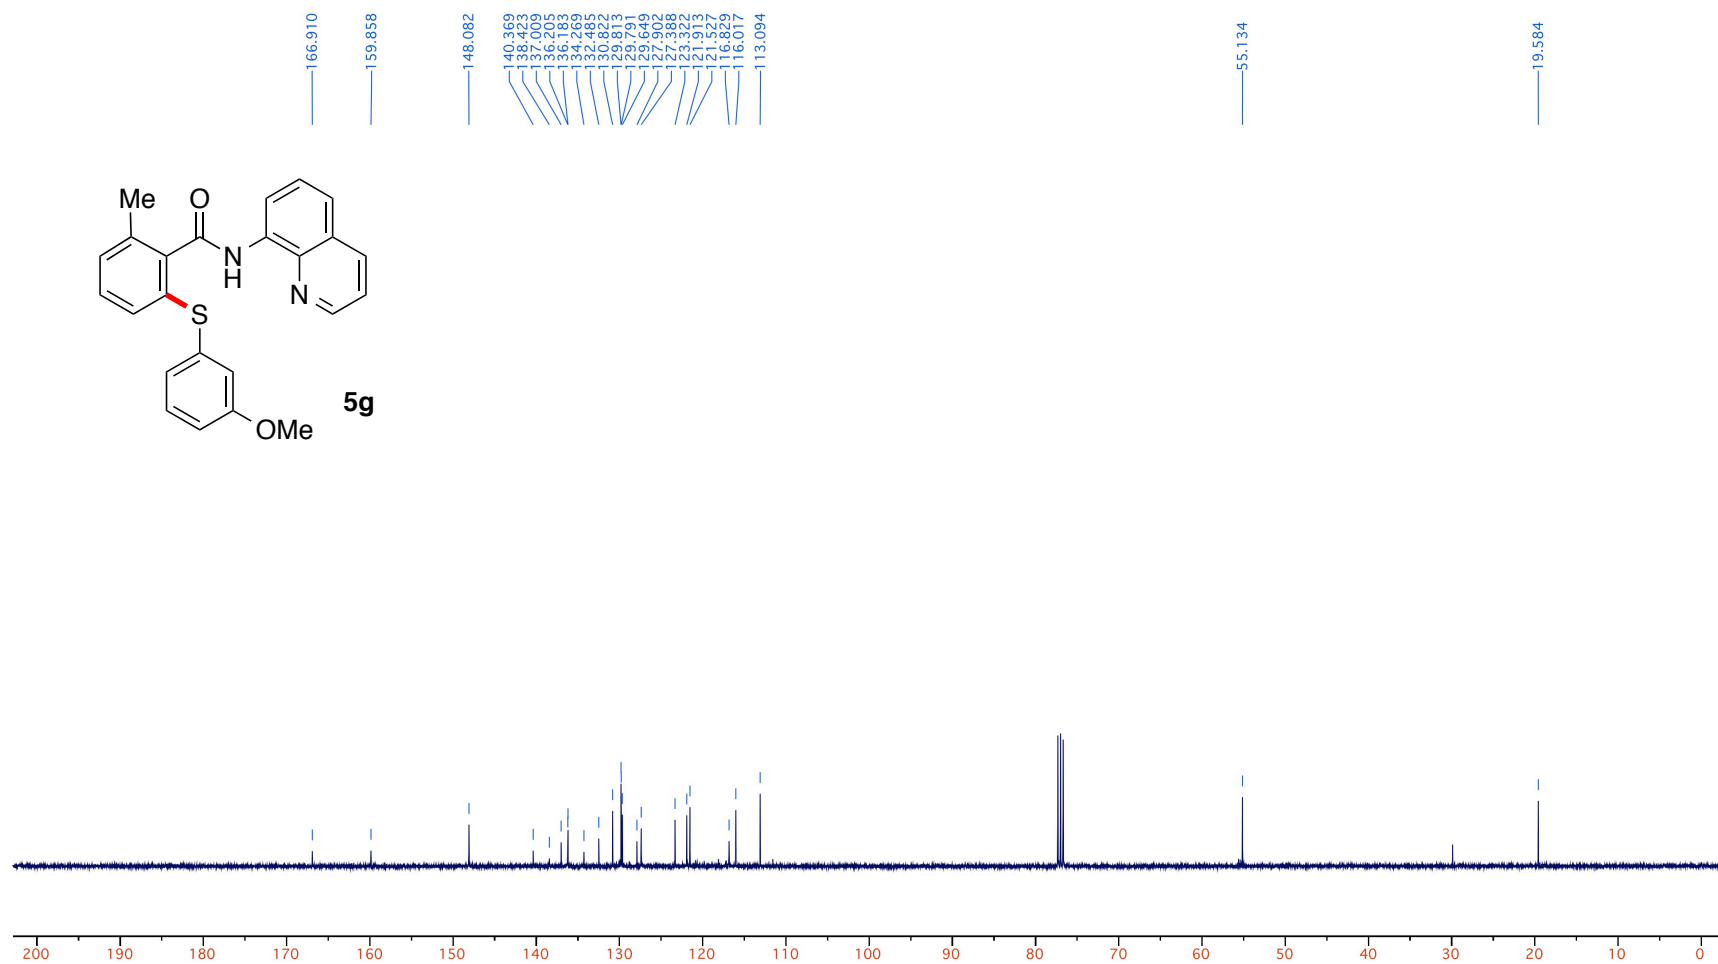



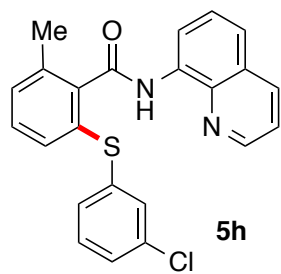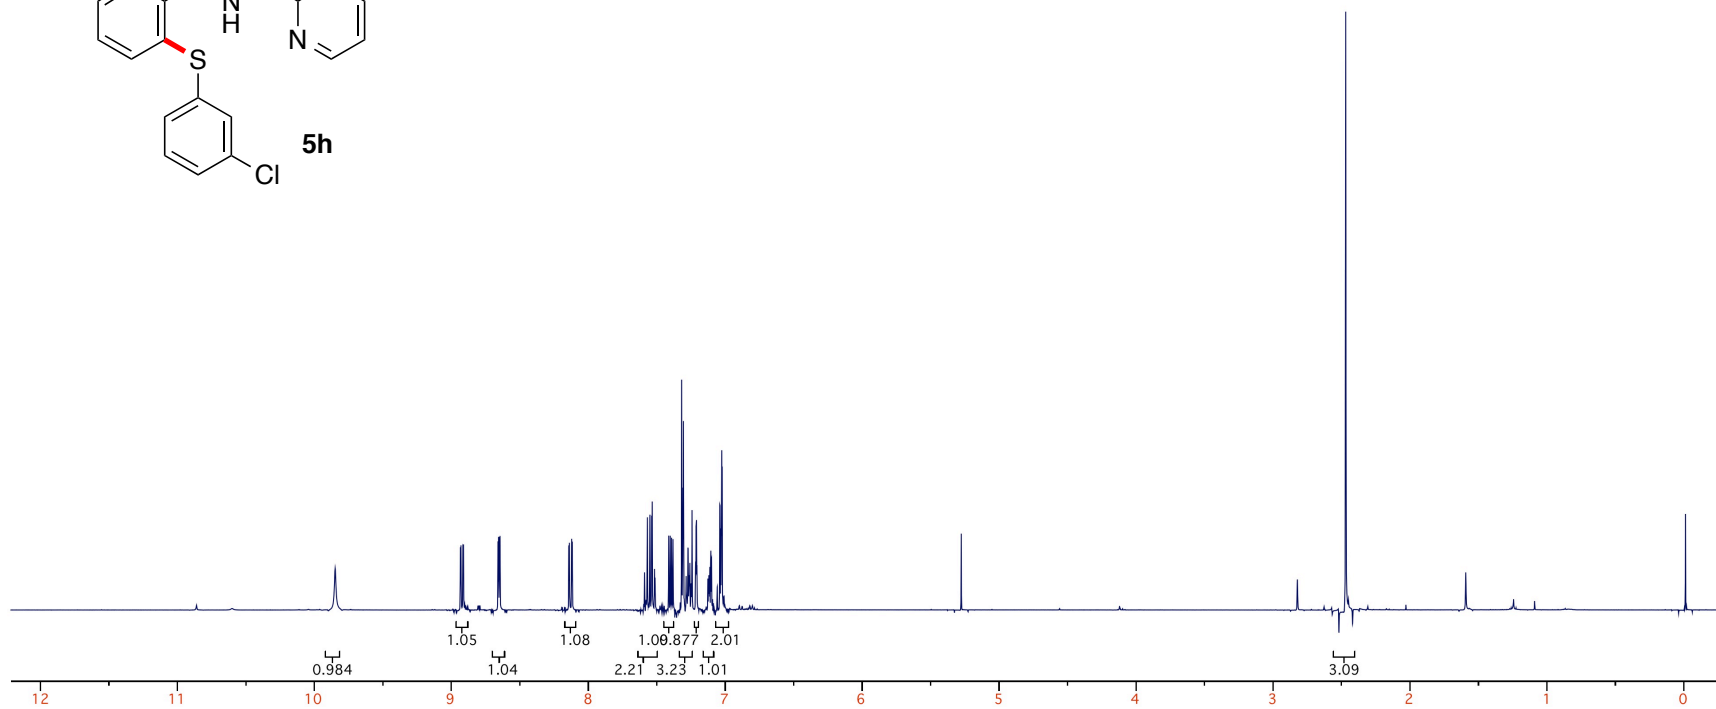

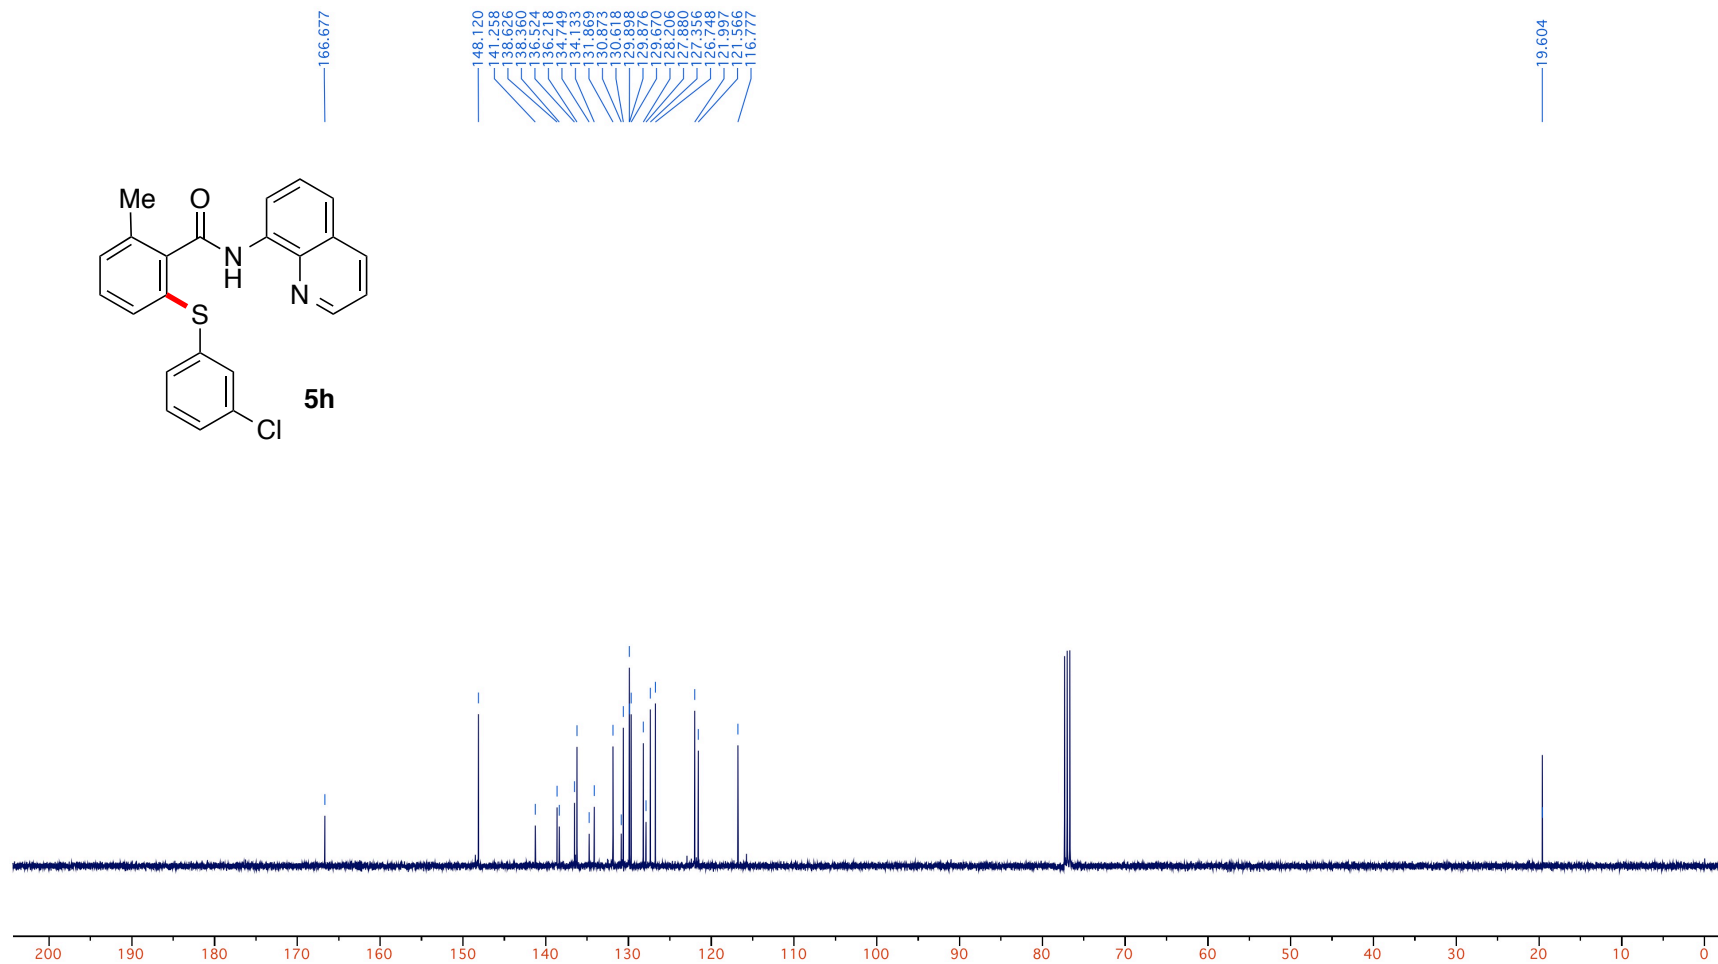

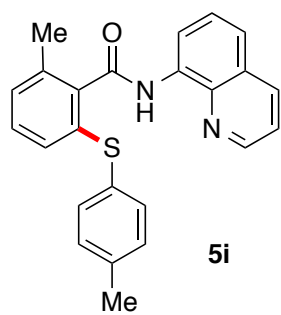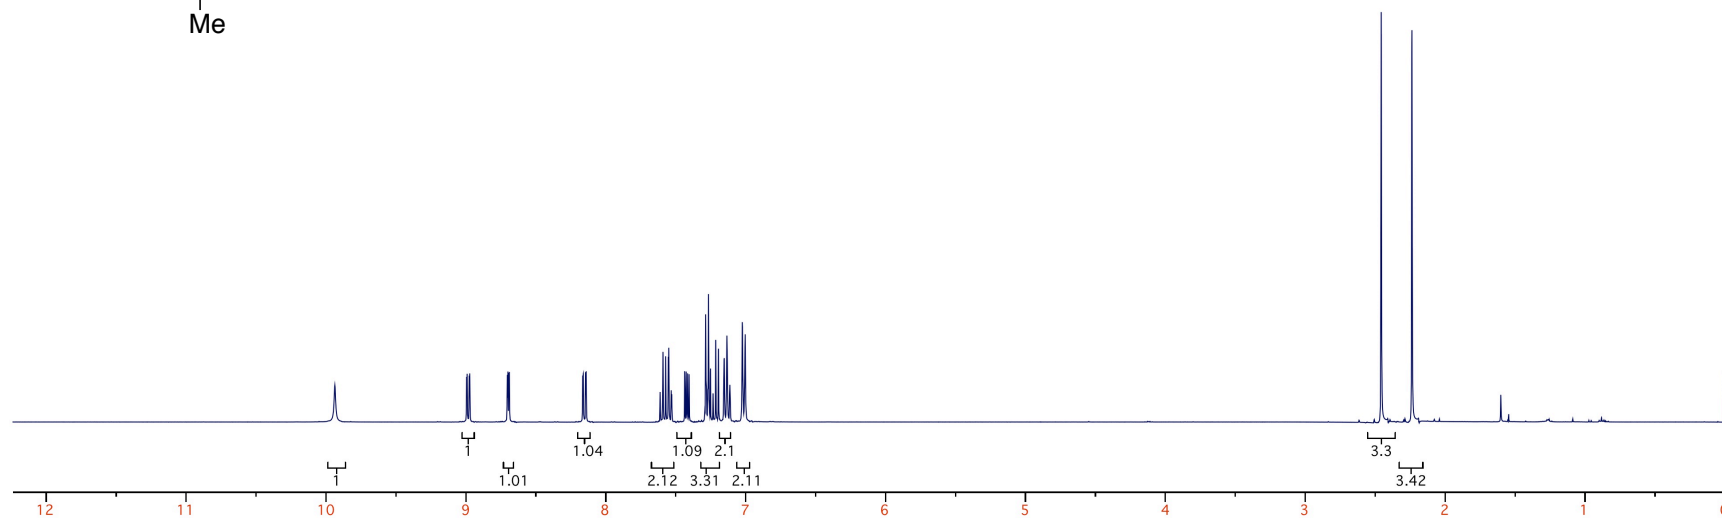

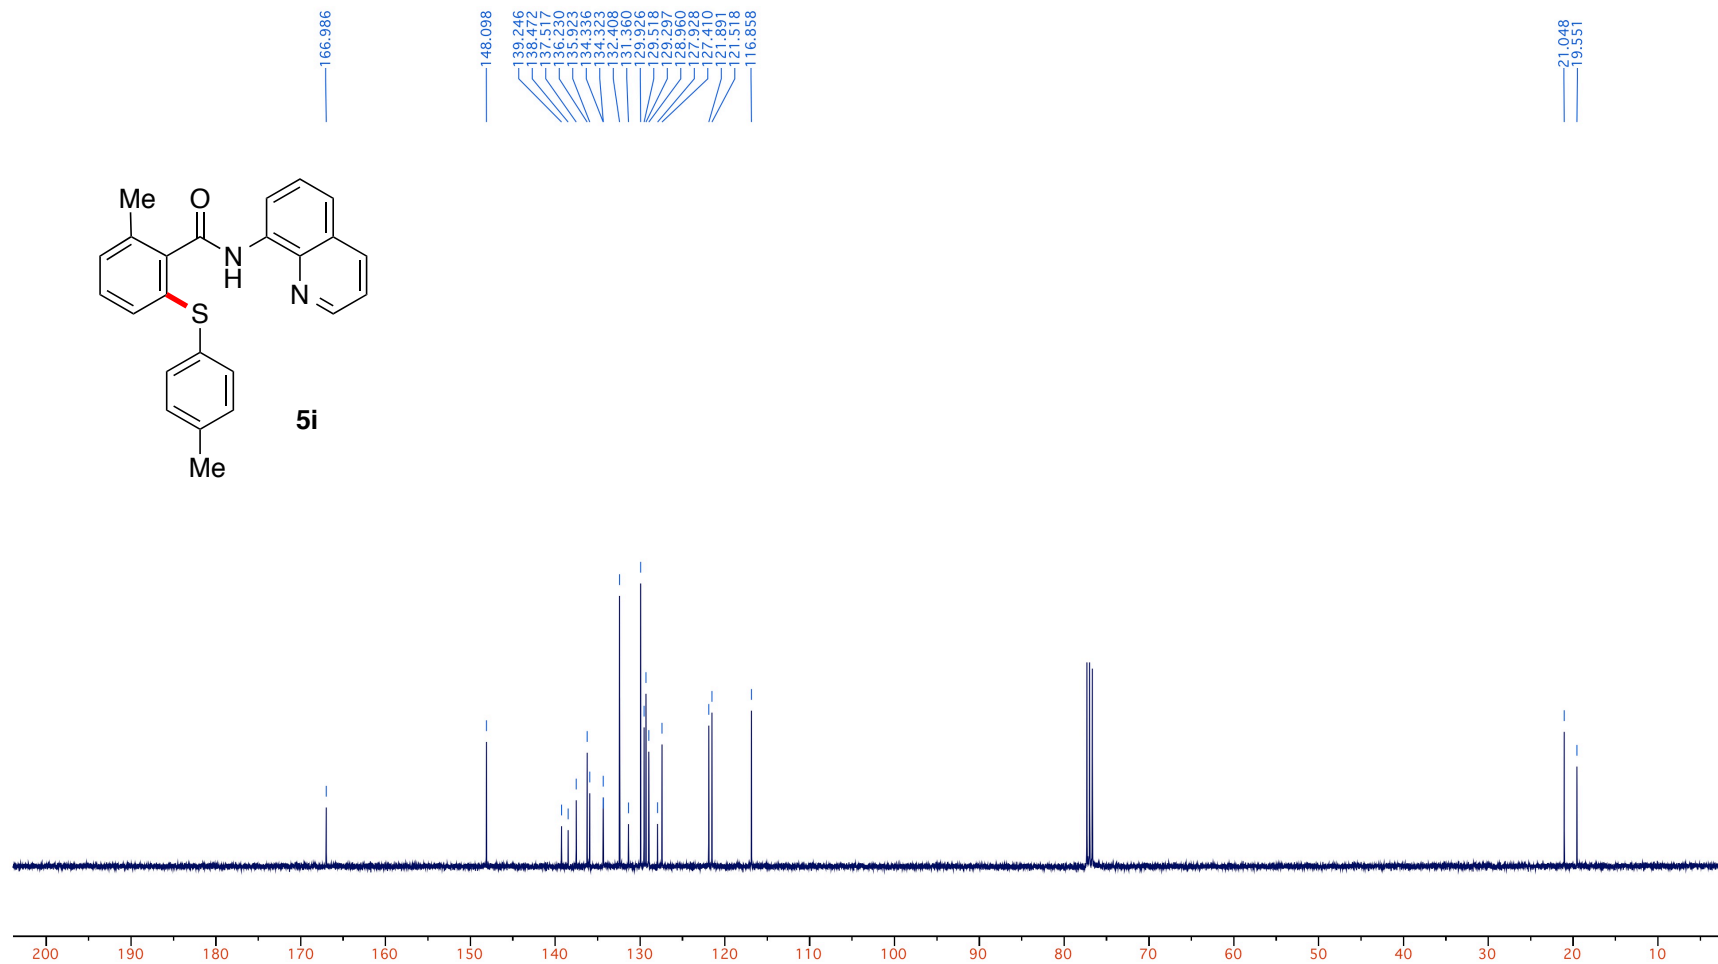

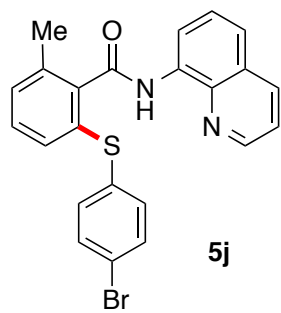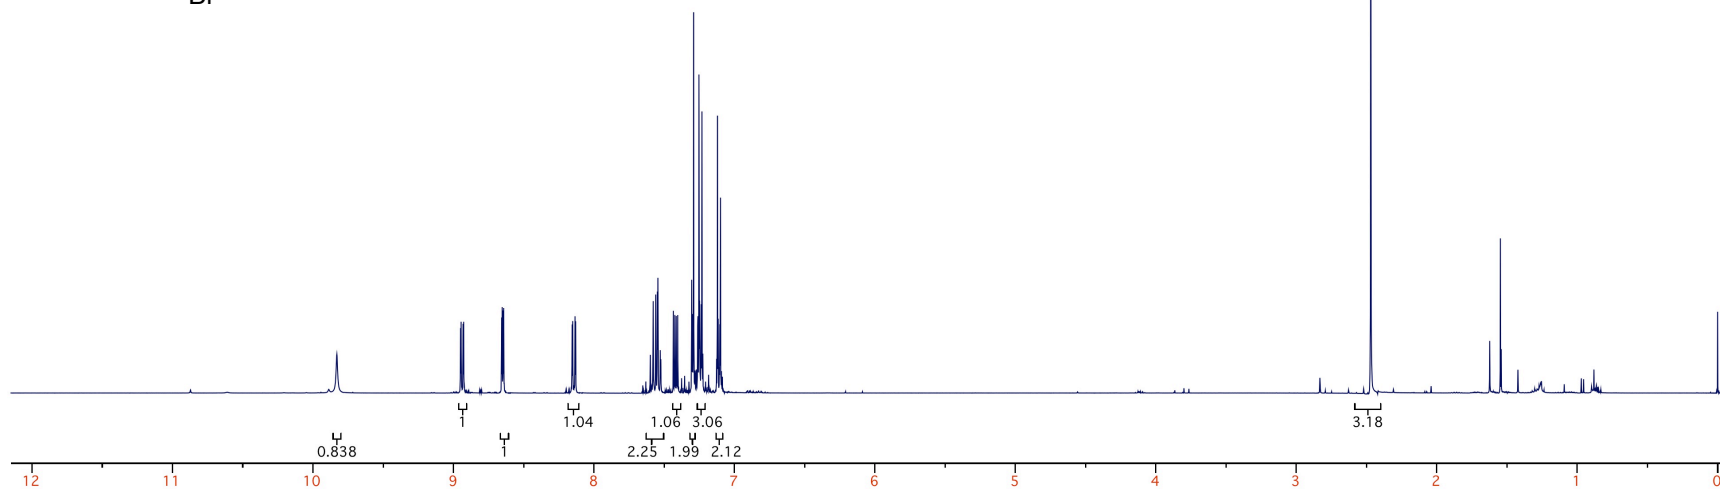

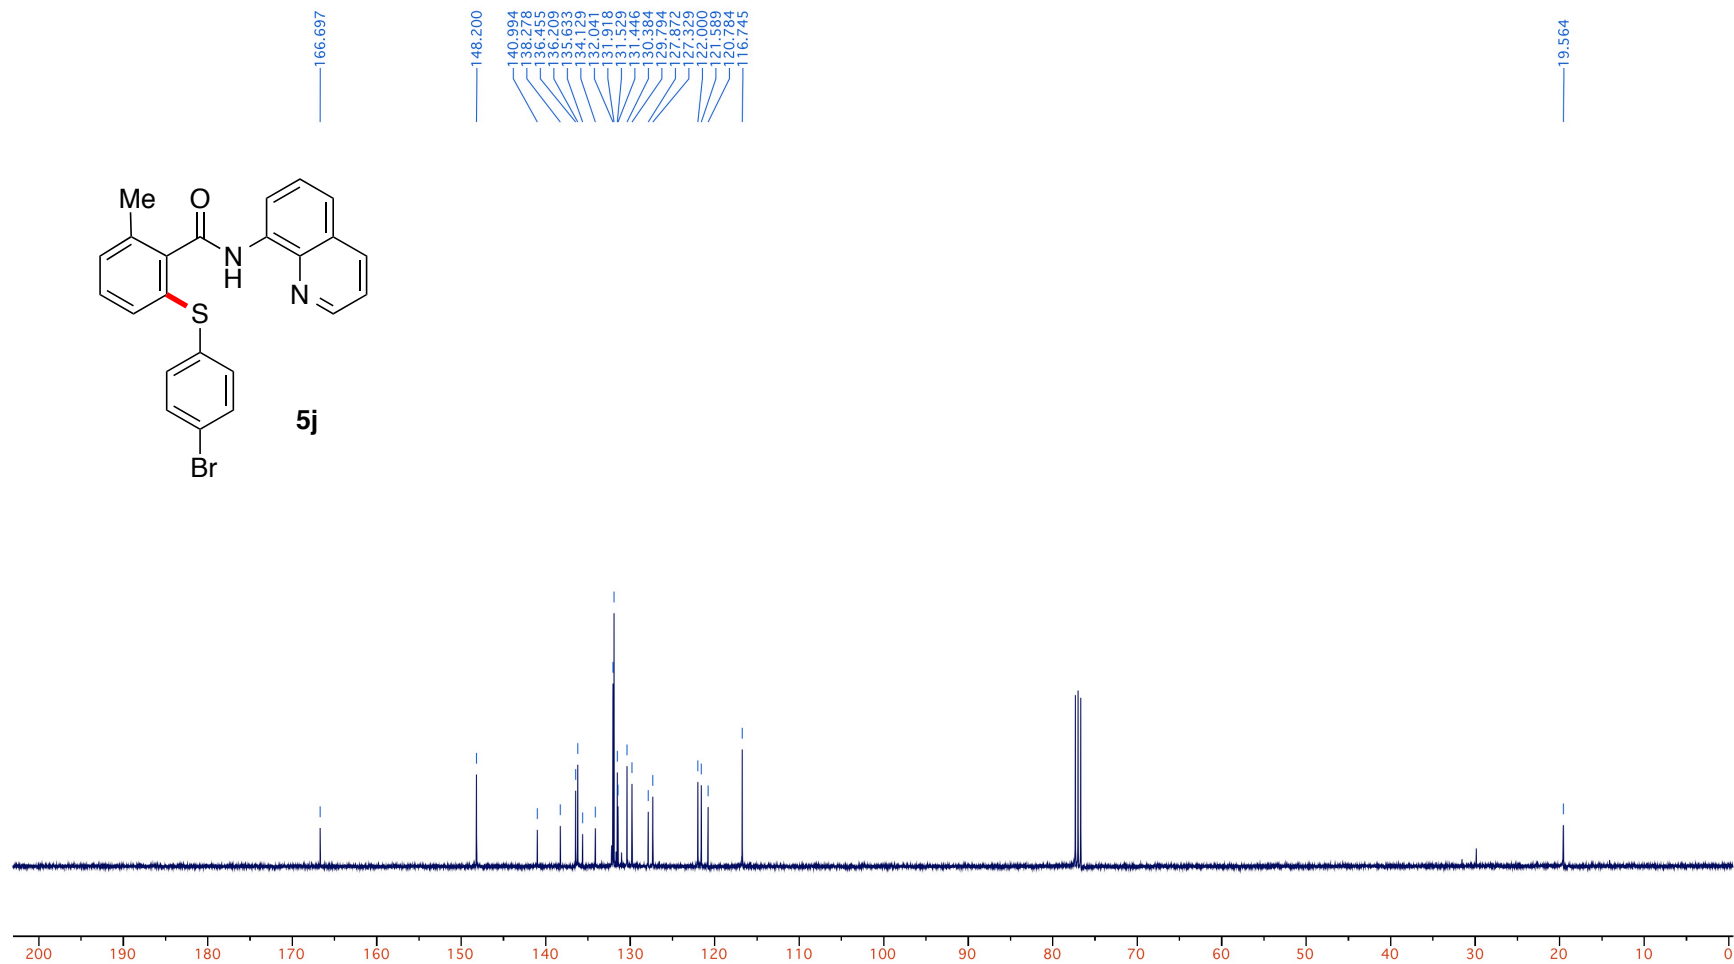

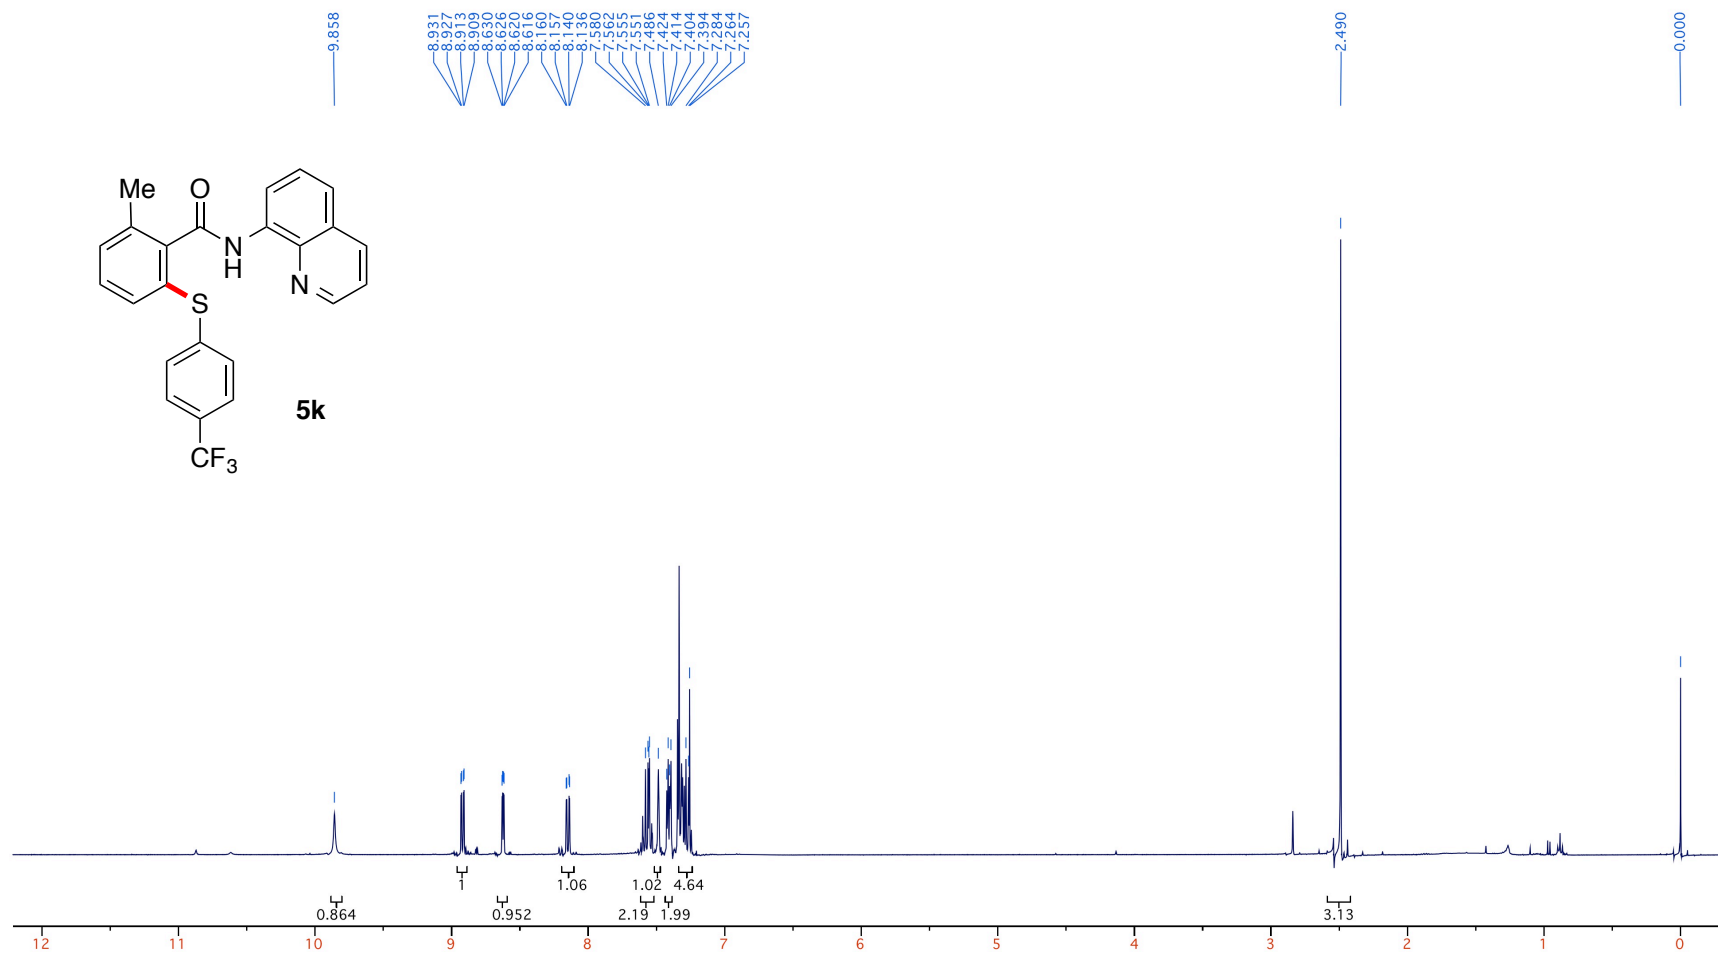

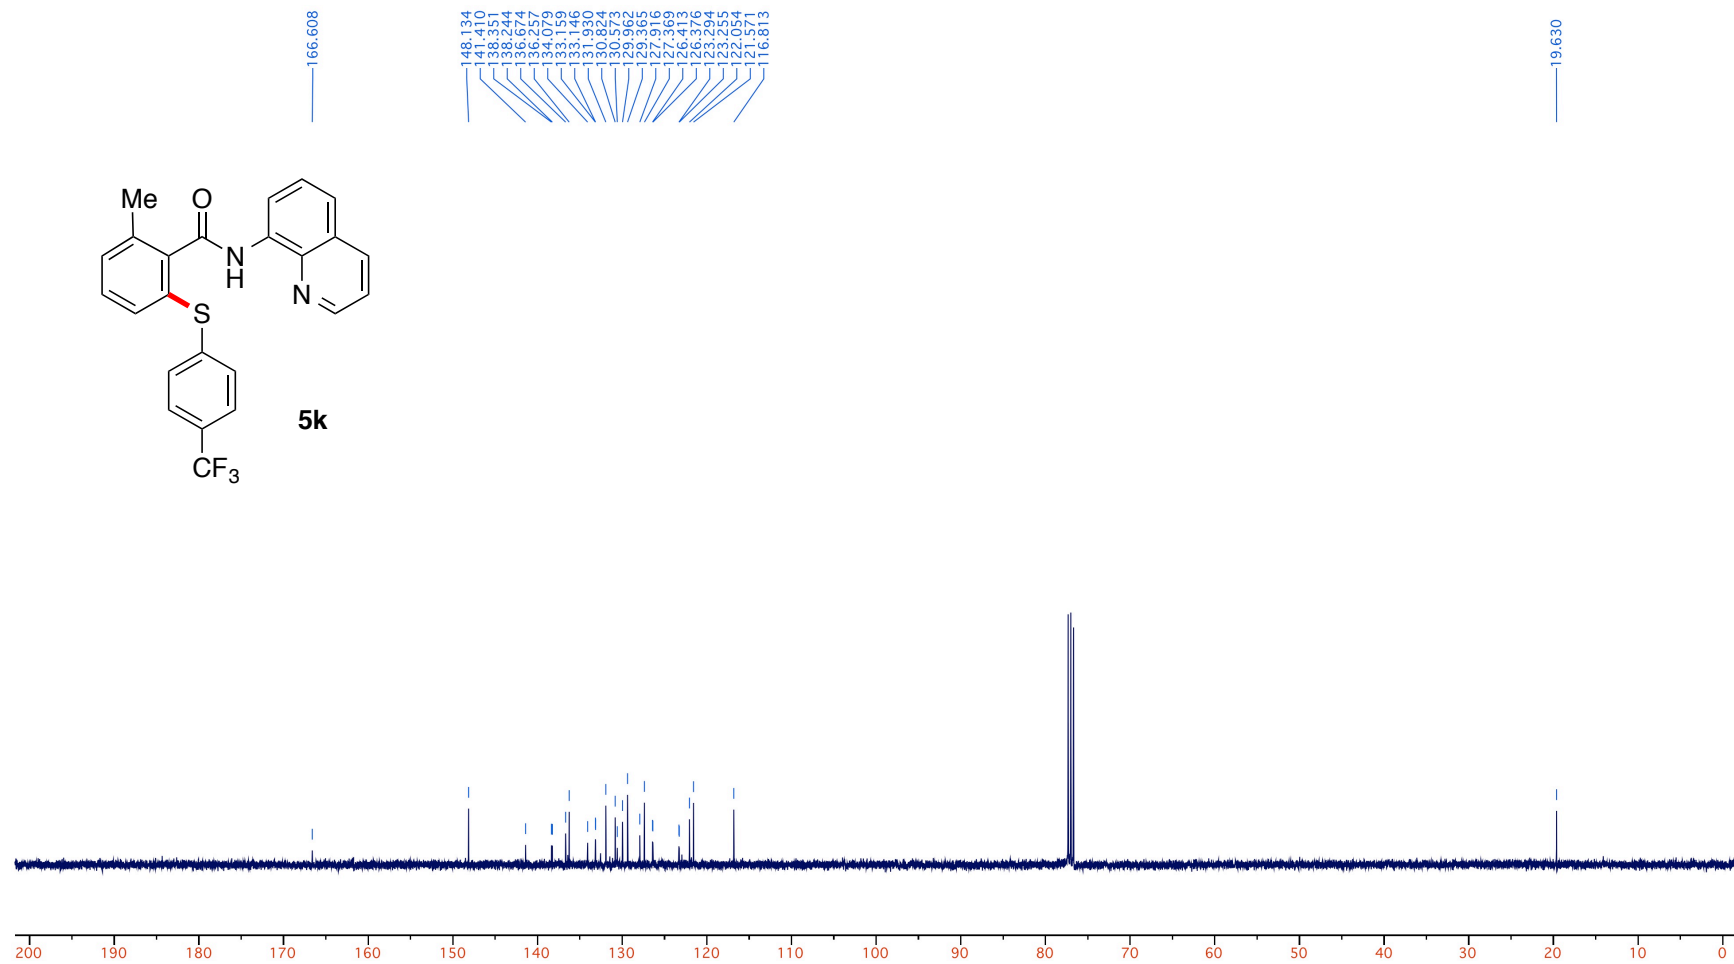



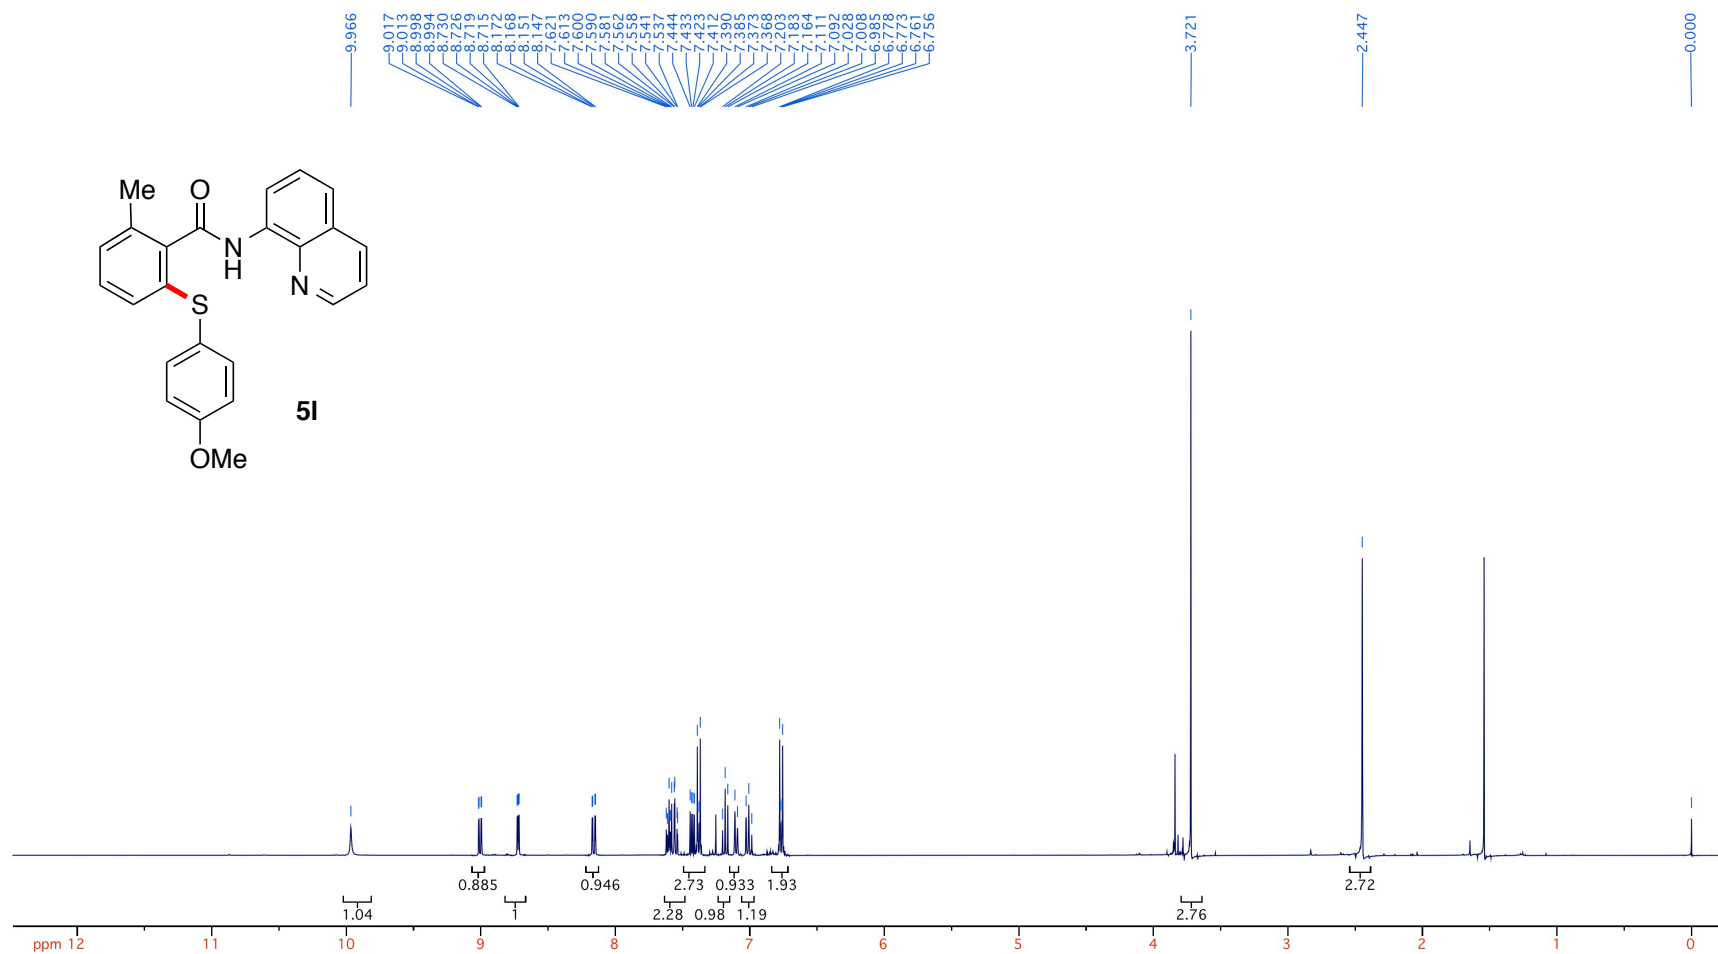

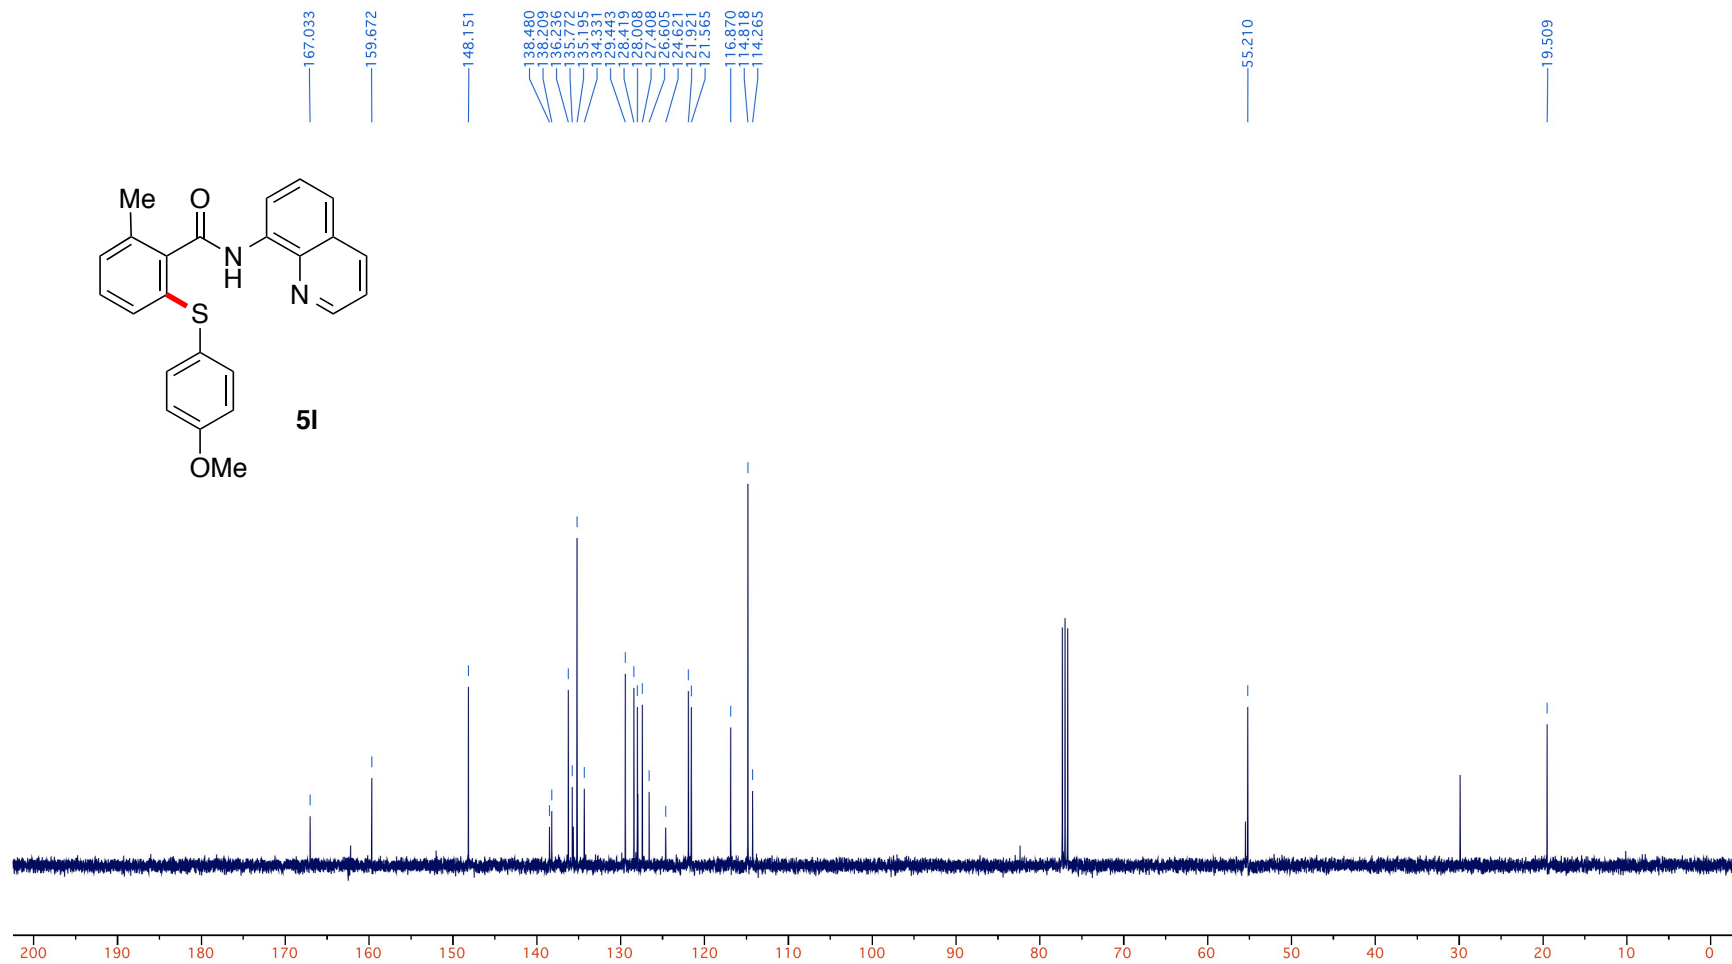

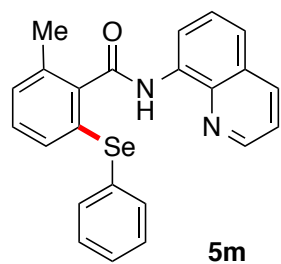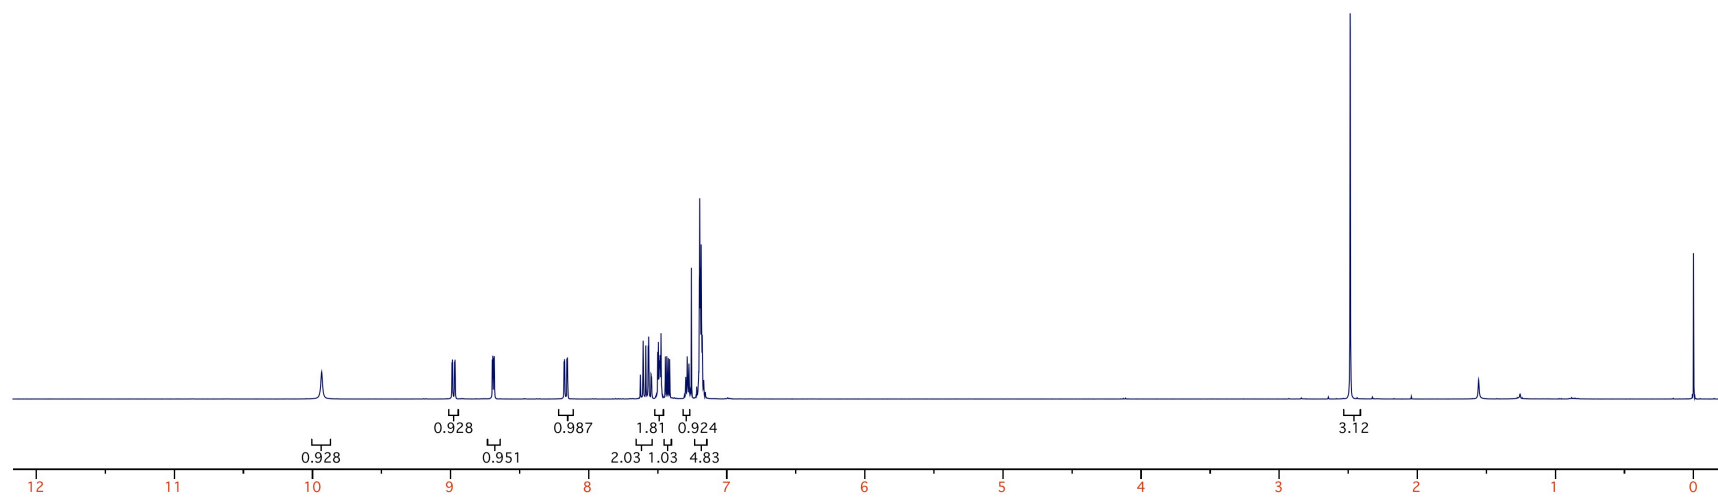

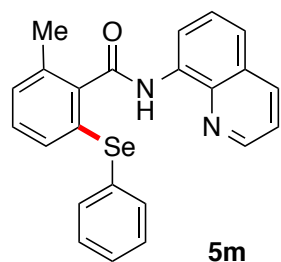

5m

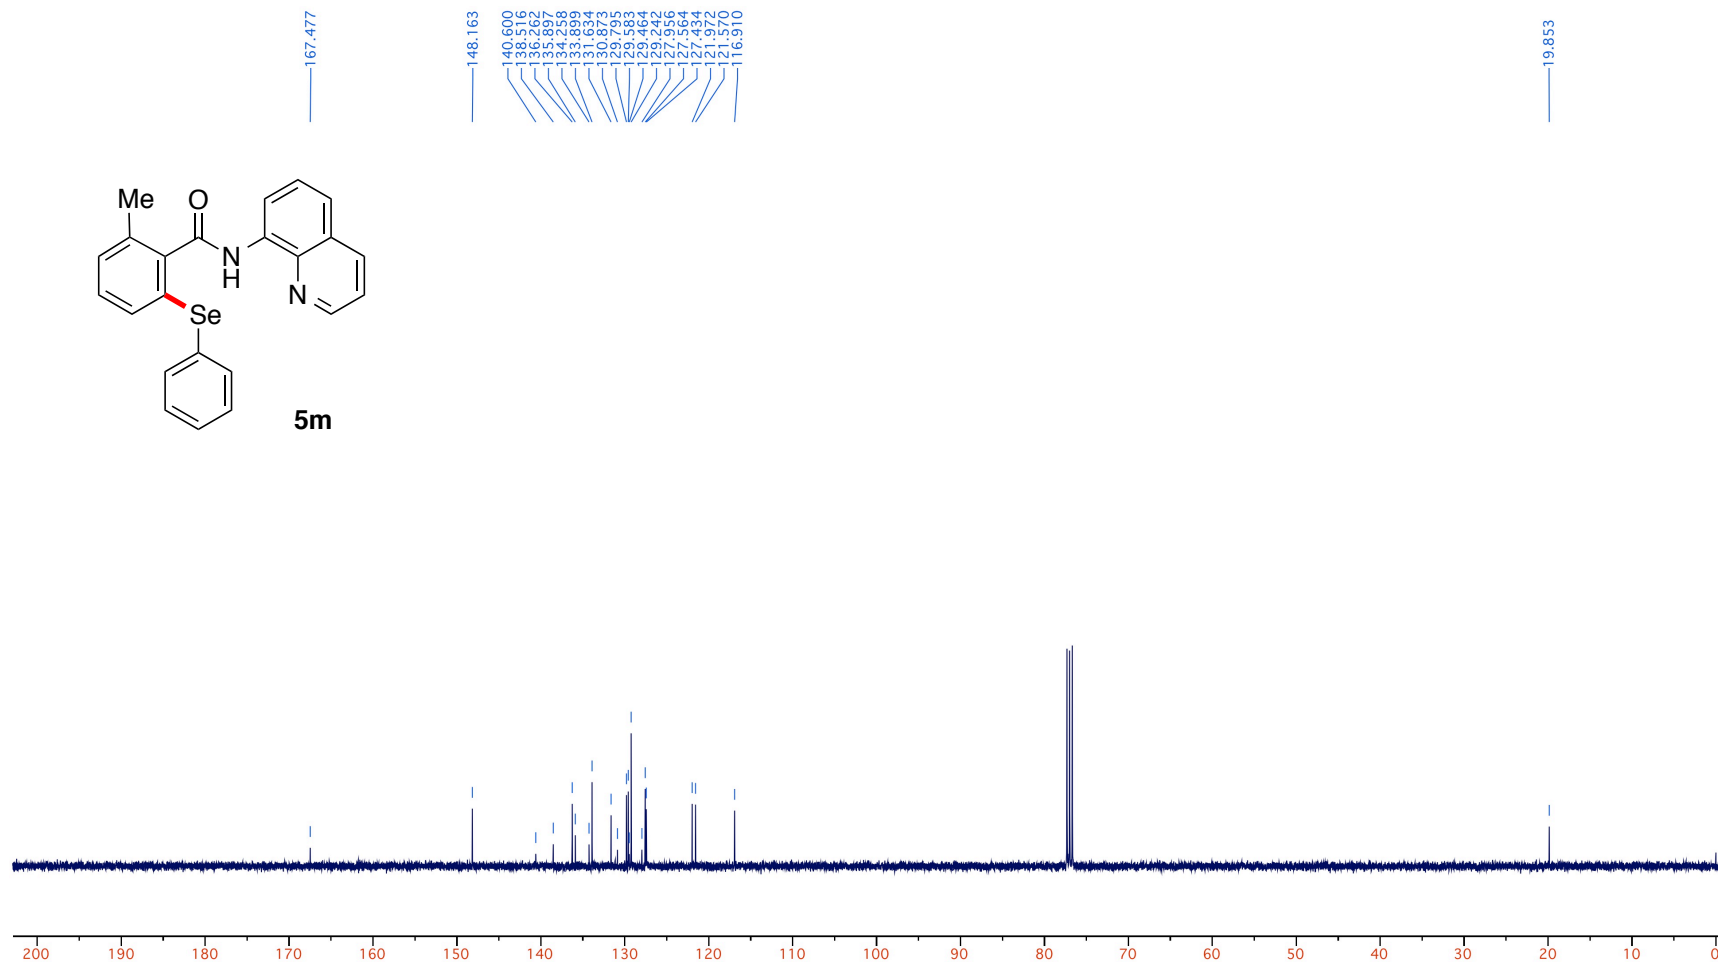

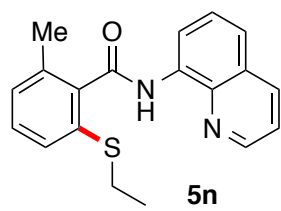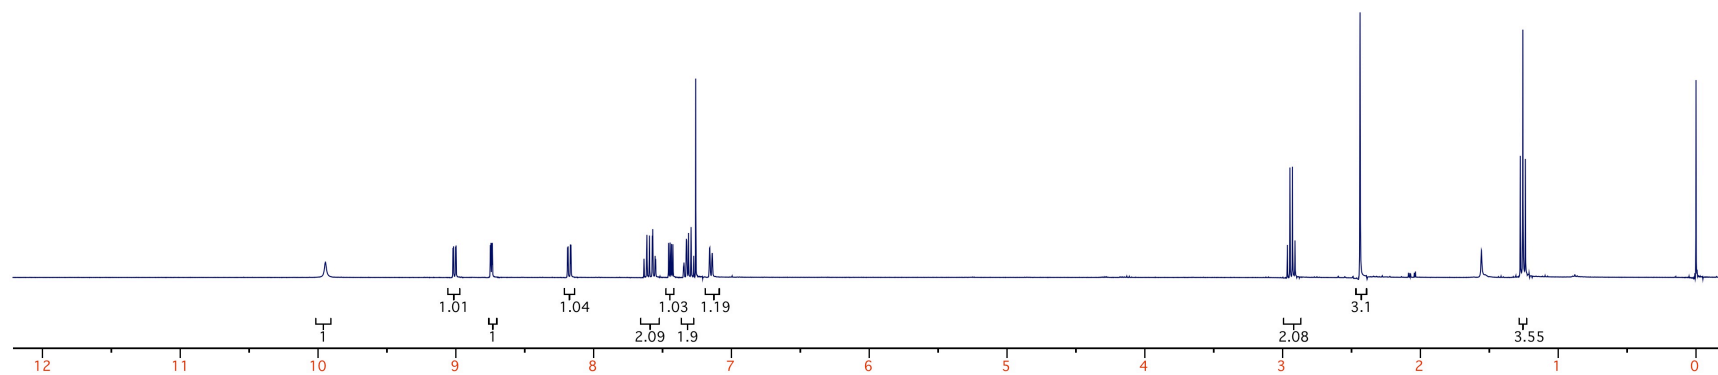

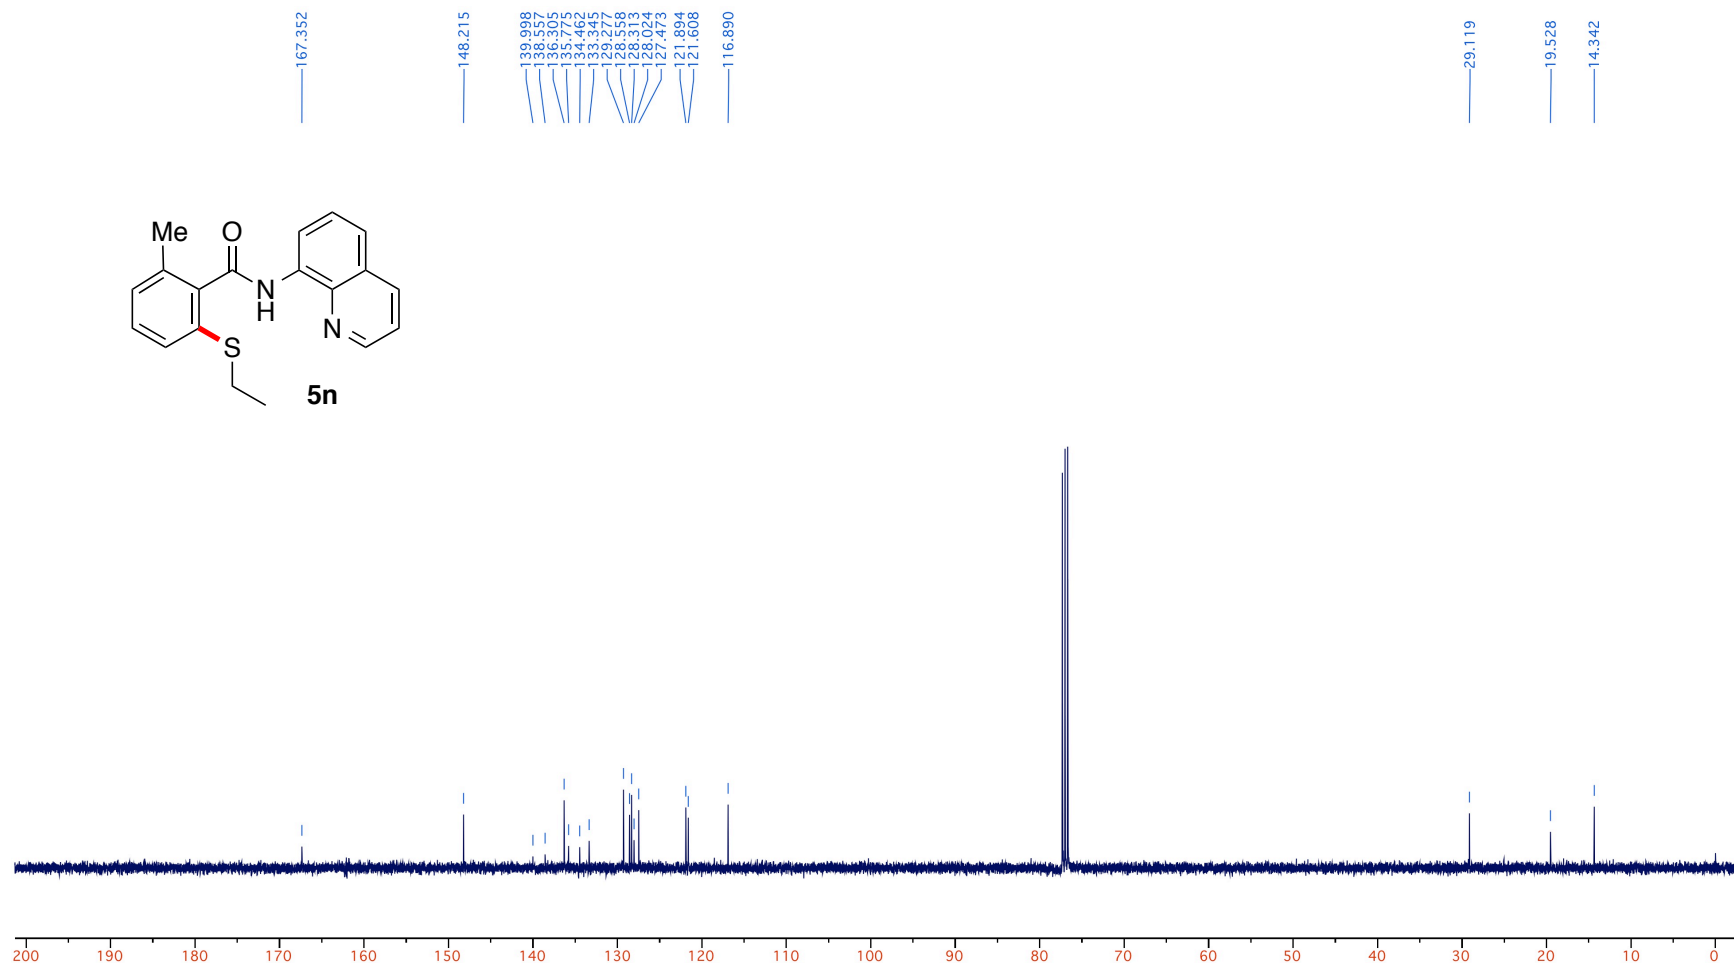

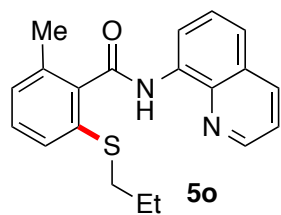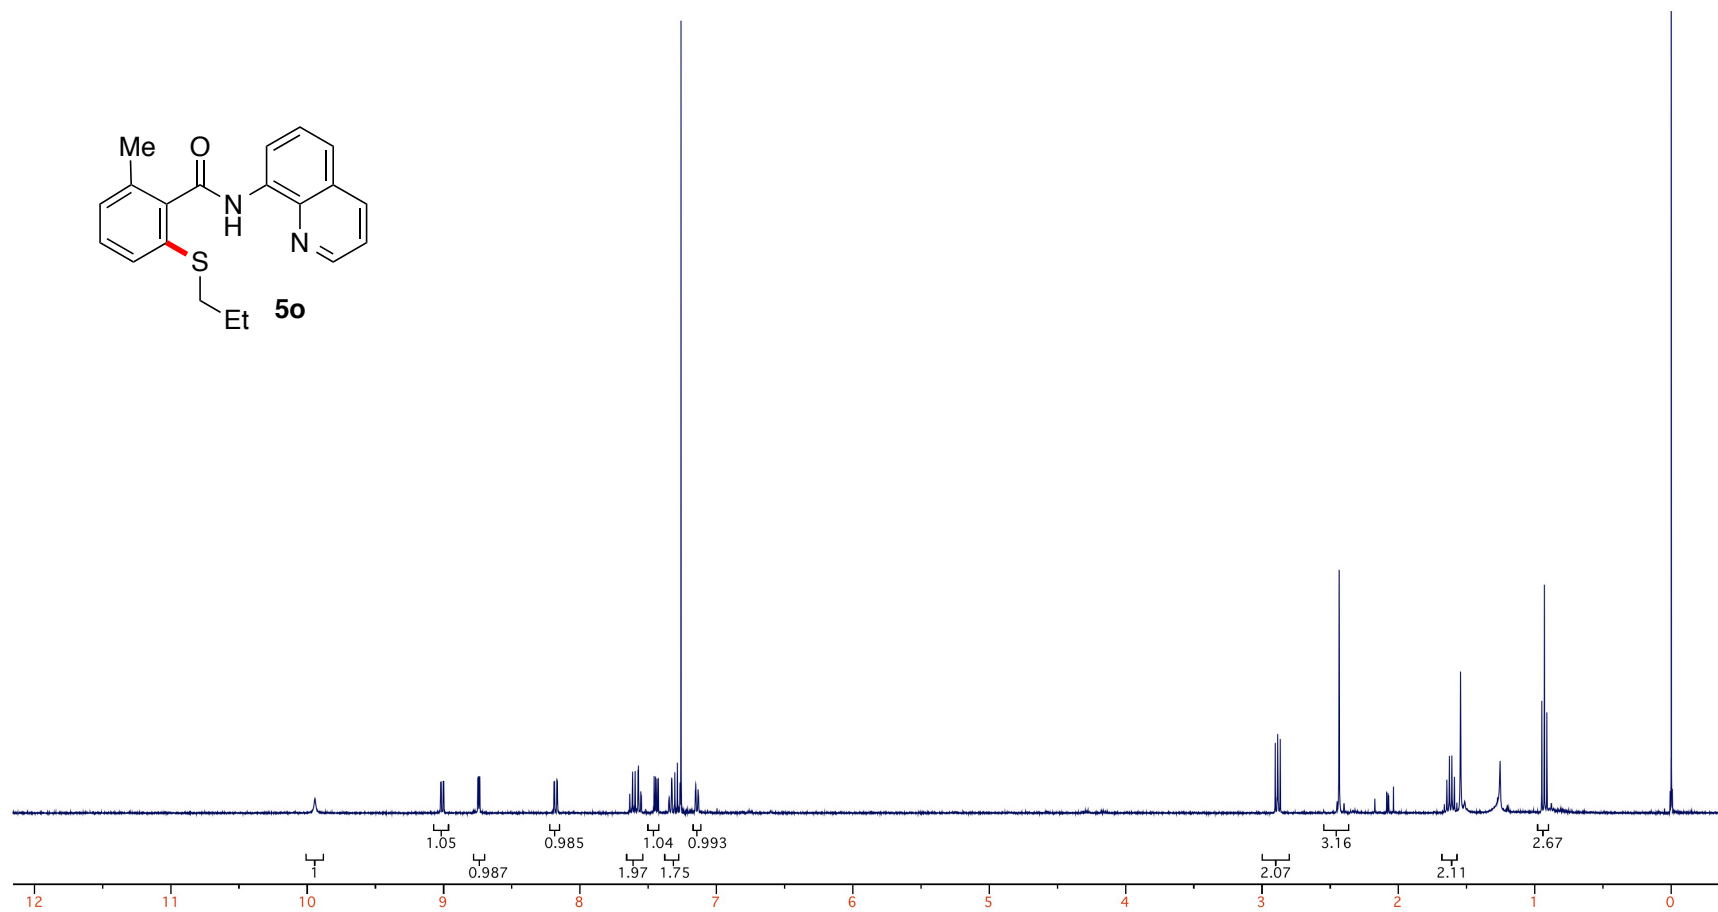

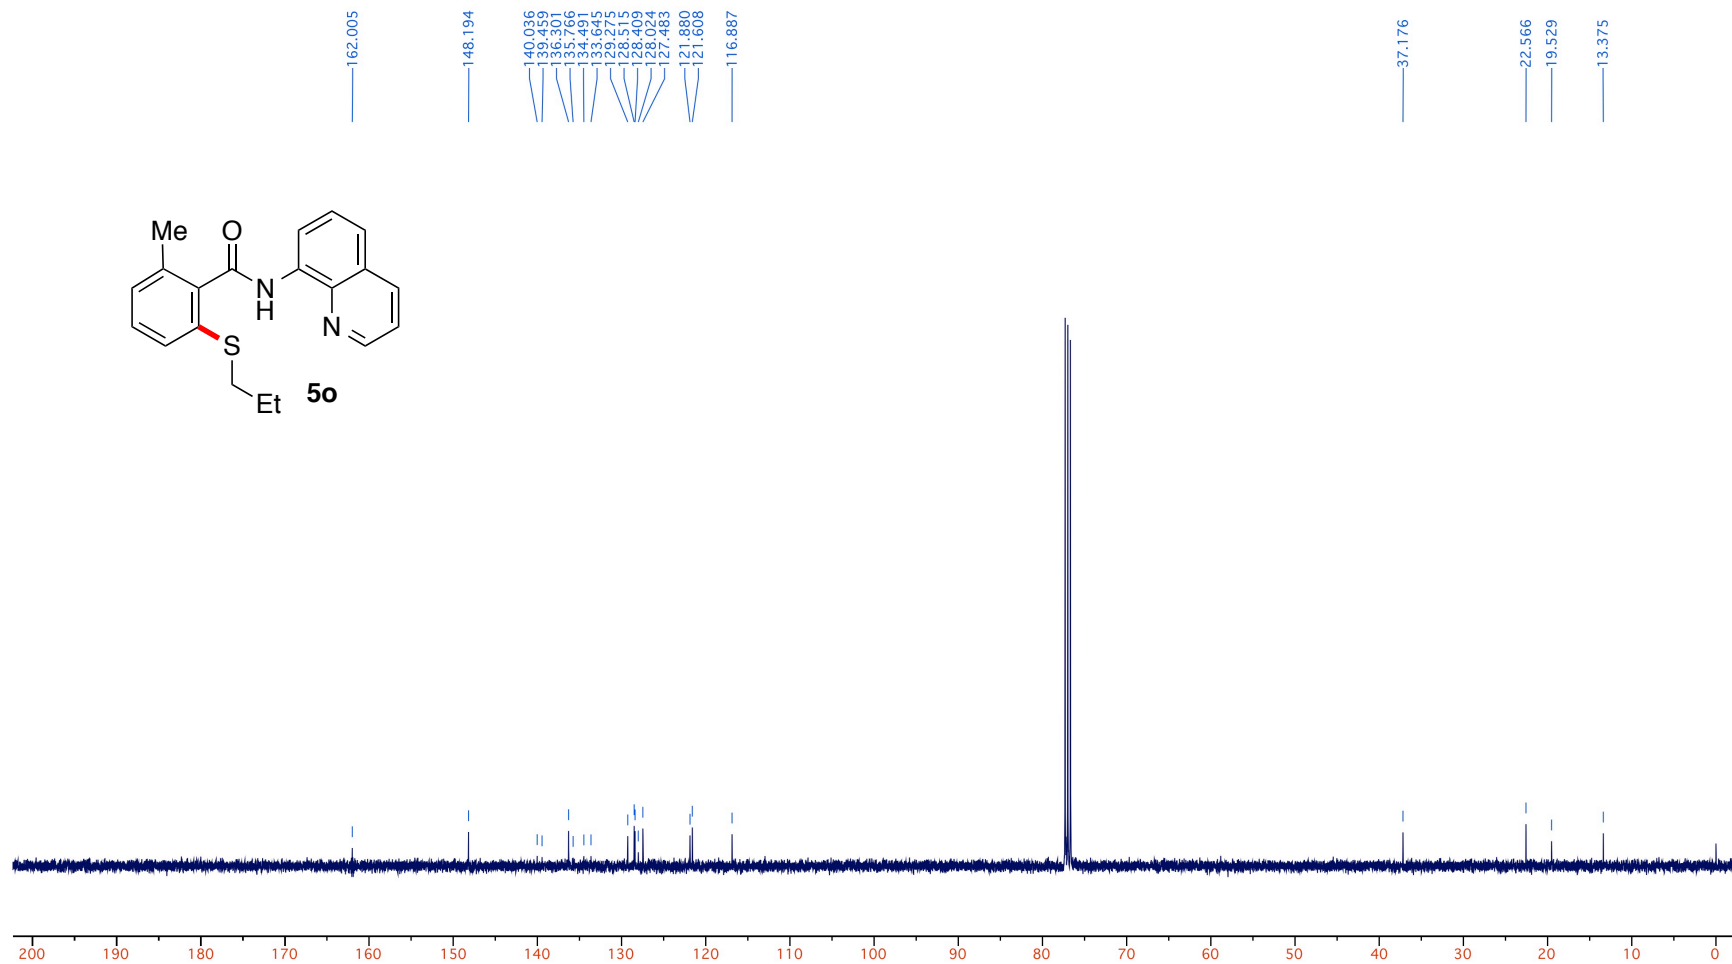



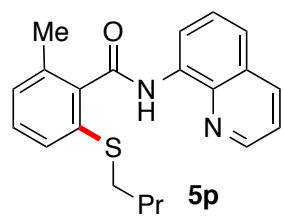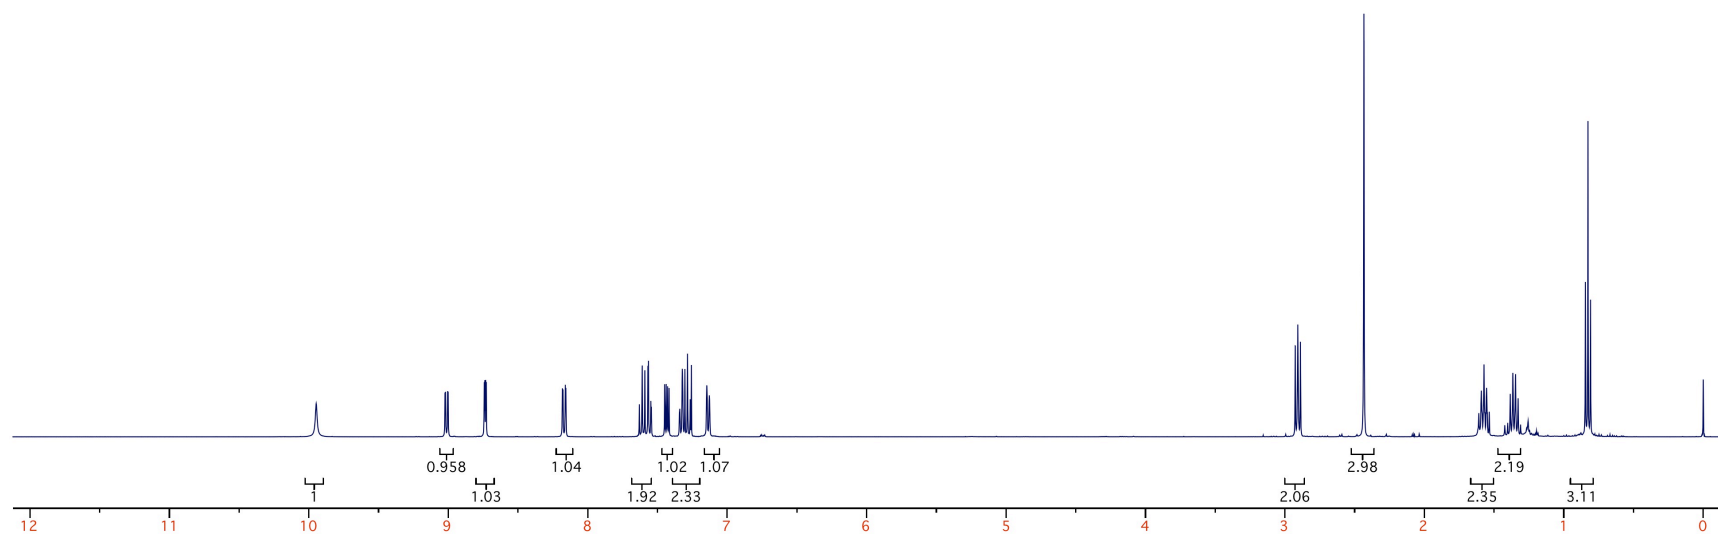

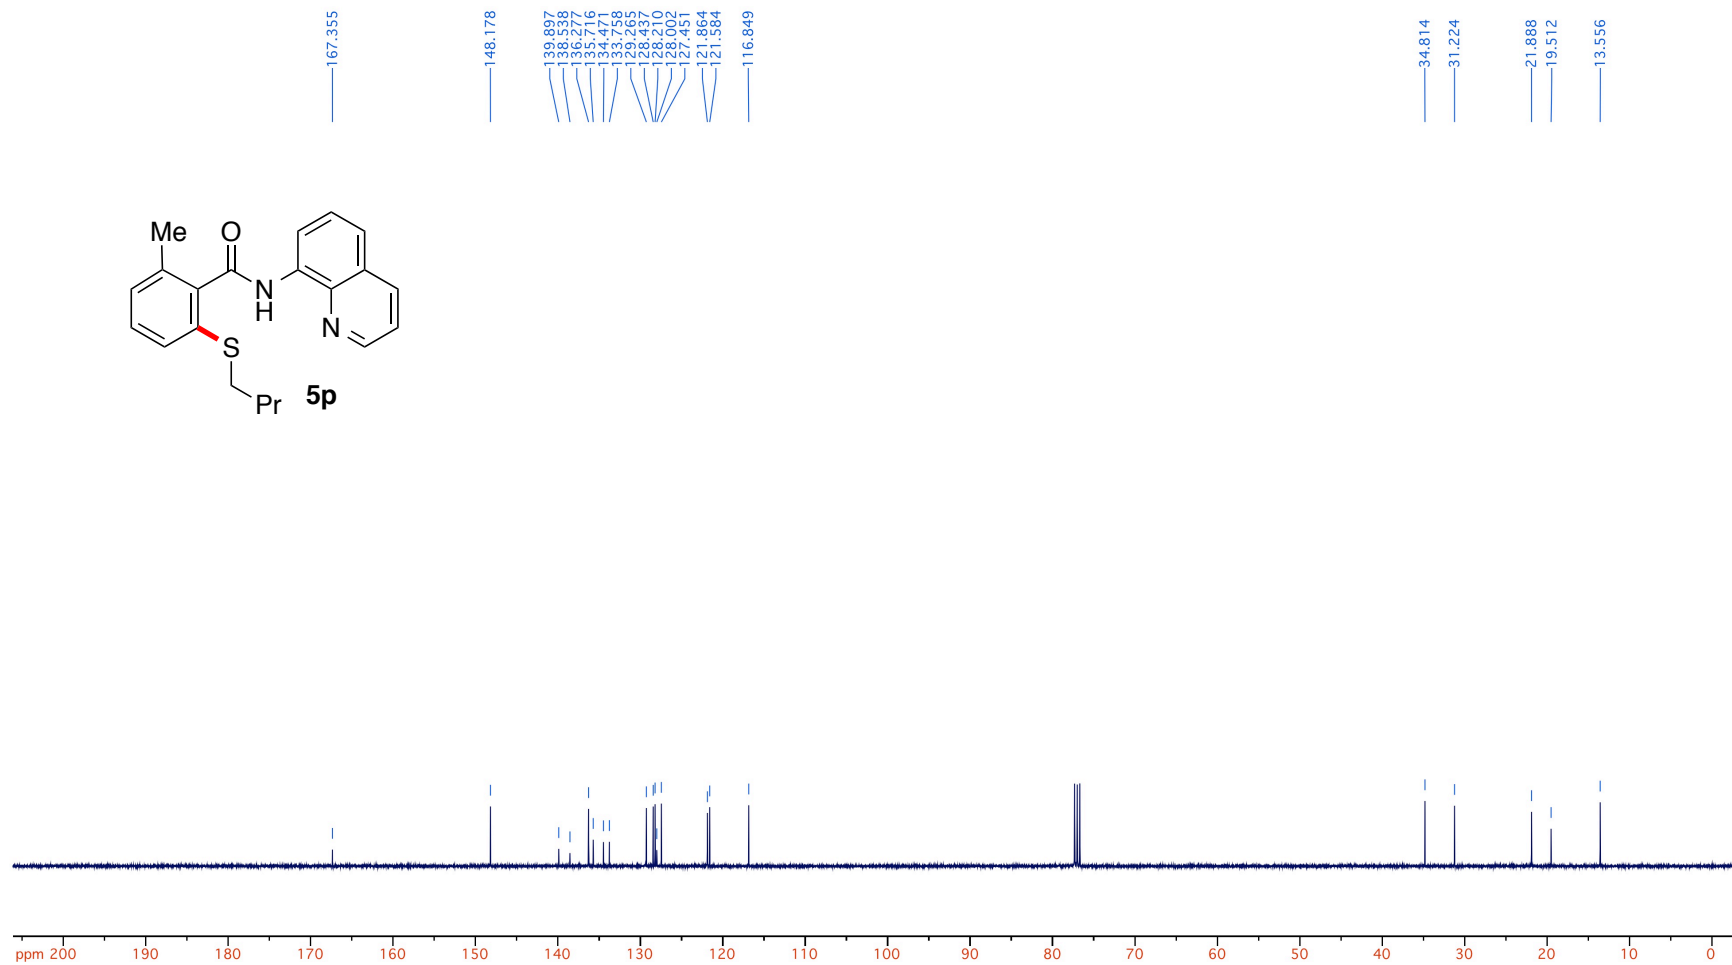

Supplement: c5cc01970b1.pdf [file c5cc01970b1.pdf]
